# Supplementary material for: FBXL19 recruits CDK-Mediator to CpG islands of developmental genes priming them for activation during lineage commitment
Source: eLife journal article supplement (doi:10.7554/elife.37084), 2018-05-29
Supplement: supp [file elife-37084-supp-v1.zip]

Archive with 10 entries (10 files):
- elife_poa_e37084_Figure_2_figure_supplement_1.pdf
- elife_poa_e37084_Figure_6_source_data_1.xlsx
- elife_poa_e37084_Transparent_Reporting_File.pdf
- elife_poa_e37084_Figure_1_figure_supplement_1.pdf
- elife_poa_e37084_Figure_4_figure_supplement_1.pdf
- elife_poa_e37084_Figure_6_figure_supplement_1.pdf
- elife_poa_e37084_Figure_2_source_data_1.xls
- elife_poa_e37084_Figure_7_figure_supplement_1.pdf
- elife_poa_e37084_Figure_5_figure_supplement_1.pdf
- elife_poa_e37084_Figure_3_figure_supplement_1.pdf
