# Supplementary material for: FBXL19 recruits CDK-Mediator to CpG islands of developmental genes priming them for activation during lineage commitment
Source: eLife journal article supplement (doi:10.7554/elife.37084), 2018-05-29
Supplement: supp [file elife-37084-supp-v1.zip › elife_poa_e37084_Figure_2_source_data_1.xls]

## Sheet: EV_1
User	bmk
Search title	QE0325_EDimitrova_rerun_1.mgf
MS data file	D:\MGFs\11_2014\QE0325_EDimitrova_rerun_1.mgf
Database	UniProt_SwissProt 20131208
Taxonomy	Mus musculus (house mouse) (16,642 sequences)
Timestamp	25 Nov 2014 at 10:07:41 GMT
Type of search	MS/MS Ion Search
Enzyme	Trypsin
Fixed modifications	Carbamidomethyl (C)
Variable modifications	Deamidated (N),Deamidated (Q),Oxidation (M)
Mass values	Monoisotopic
Protein mass	Unrestricted
Peptide mass tolerance	10 ppm
Fragment mass tolerance	0.05 Da
Max missed cleavages	1
Instrument type	Q-Exactive
Number of queries	7820
Significance threshold p<	0.001351
Max. number of families	AUTO
Ions score or expect cut-off	20
Preferred taxonomy	All entries
Show Percolator scores?	no
Family	Member	Database	Accession	Score	Mass	Num. of matches	Num. of significant matches	Num. of sequences	Num. of significant sequences	emPAI	Description
3	1	UniProt_SwissProt	P62806	271	11360	22	15	10	8	38.88	RecName: Full=Histone H4;
1	1	UniProt_SwissProt	P53395	680	53555	75	47	28	21	6.66	RecName: Full=Lipoamide acyltransferase component of branched-chain alpha-keto acid dehydrogenase complex, mitochondrial; EC=2.3.1.168; AltName: Full=Branched-chain alpha-keto acid dehydrogenase complex component E2; Short=BCKAD-E2; Short=BCKADE2; AltName: Full=Dihydrolipoamide acetyltransferase component of branched-chain alpha-keto acid dehydrogenase complex; AltName: Full=Dihydrolipoamide bran…
4	1	UniProt_SwissProt	P60710	236	42052	22	16	19	14	4.4	RecName: Full=Actin, cytoplasmic 1; AltName: Full=Beta-actin; Contains: RecName: Full=Actin, cytoplasmic 1, N-terminally processed;
18	1	UniProt_SwissProt	Q6ZWY9	145	13898	10	7	6	5	4.36	RecName: Full=Histone H2B type 1-C/E/G;
18	2	UniProt_SwissProt	Q64524	141	13985	7	7	5	5	4.29	RecName: Full=Histone H2B type 2-E; AltName: Full=H2b 613;
60	1	UniProt_SwissProt	P02301	58	15363	13	5	7	5	3.59	RecName: Full=Histone H3.3C; AltName: Full=Embryonic;
50	1	UniProt_SwissProt	P62264	64	16434	5	4	5	4	2.12	RecName: Full=40S ribosomal protein S14;
12	1	UniProt_SwissProt	P15864	168	21254	7	6	6	5	2.03	RecName: Full=Histone H1.2; AltName: Full=H1 VAR.1; AltName: Full=H1c;
15	1	UniProt_SwissProt	Q9WTX5	159	18831	6	4	5	4	1.7	RecName: Full=S-phase kinase-associated protein 1; AltName: Full=Cyclin-A/CDK2-associated protein p19; AltName: Full=S-phase kinase-associated protein 1A; AltName: Full=p19A; AltName: Full=p19skp1;
30	1	UniProt_SwissProt	Q8BFU2	90	14113	6	3	5	3	1.7	RecName: Full=Histone H2A type 3;
14	1	UniProt_SwissProt	Q9EQU5	162	33358	23	10	16	7	1.69	RecName: Full=Protein SET; AltName: Full=Phosphatase 2A inhibitor I2PP2A; Short=I-2PP2A; AltName: Full=Template-activating factor I; Short=TAF-I;
2	1	UniProt_SwissProt	Q3ULD5	453	61910	17	13	13	10	1.51	RecName: Full=Methylcrotonoyl-CoA carboxylase beta chain, mitochondrial; Short=MCCase subunit beta; EC=6.4.1.4; AltName: Full=3-methylcrotonyl-CoA carboxylase 2; AltName: Full=3-methylcrotonyl-CoA carboxylase non-biotin-containing subunit; AltName: Full=3-methylcrotonyl-CoA:carbon dioxide ligase subunit beta; Flags: Precursor;
32	1	UniProt_SwissProt	P61358	86	15788	6	3	5	3	1.43	RecName: Full=60S ribosomal protein L27;
5	1	UniProt_SwissProt	P10126	218	50424	22	12	15	9	1.33	RecName: Full=Elongation factor 1-alpha 1; Short=EF-1-alpha-1; AltName: Full=Elongation factor Tu; Short=EF-Tu; AltName: Full=Eukaryotic elongation factor 1 A-1; Short=eEF1A-1;
10	1	UniProt_SwissProt	P63017	176	71055	21	12	17	12	1.23	RecName: Full=Heat shock cognate 71 kDa protein; AltName: Full=Heat shock 70 kDa protein 8;
70	1	UniProt_SwissProt	Q9D1R9	55	13513	3	2	3	2	0.99	RecName: Full=60S ribosomal protein L34;
23	1	UniProt_SwissProt	Q9Z204	117	34421	9	5	7	5	0.99	RecName: Full=Heterogeneous nuclear ribonucleoproteins C1/C2; Short=hnRNP C1/C2;
13	1	UniProt_SwissProt	Q99MR8	167	79692	25	11	20	11	0.93	RecName: Full=Methylcrotonoyl-CoA carboxylase subunit alpha, mitochondrial; Short=MCCase subunit alpha; EC=6.4.1.4; AltName: Full=3-methylcrotonyl-CoA carboxylase 1; AltName: Full=3-methylcrotonyl-CoA carboxylase biotin-containing subunit; AltName: Full=3-methylcrotonyl-CoA:carbon dioxide ligase subunit alpha; Flags: Precursor;
9	1	UniProt_SwissProt	Q91ZA3	180	80498	22	12	20	11	0.91	RecName: Full=Propionyl-CoA carboxylase alpha chain, mitochondrial; Short=PCCase subunit alpha; EC=6.4.1.3; AltName: Full=Propanoyl-CoA:carbon dioxide ligase subunit alpha; Flags: Precursor;
21	1	UniProt_SwissProt	O88569	119	37437	11	5	8	4	0.88	RecName: Full=Heterogeneous nuclear ribonucleoproteins A2/B1; Short=hnRNP A2/B1;
42	1	UniProt_SwissProt	Q9R224	69	15224	4	2	4	2	0.85	RecName: Full=Protein BEX1; AltName: Full=Brain-expressed X-linked protein 1 homolog; AltName: Full=Reduced expression protein 3; Short=REX-3;
20	1	UniProt_SwissProt	O55028	141	46786	15	8	10	5	0.84	RecName: Full=[3-methyl-2-oxobutanoate dehydrogenase [lipoamide]] kinase, mitochondrial; EC=2.7.11.4; AltName: Full=Branched-chain alpha-ketoacid dehydrogenase kinase; Short=BCKD-kinase; Short=BCKDHKIN; Flags: Precursor;
8	1	UniProt_SwissProt	Q8VEK3	189	88661	23	12	17	10	0.8	RecName: Full=Heterogeneous nuclear ribonucleoprotein U; Short=hnRNP U; AltName: Full=Scaffold attachment factor A; Short=SAF-A;
88	1	UniProt_SwissProt	P62858	49	7893	1	1	1	1	0.79	RecName: Full=40S ribosomal protein S28;
53	1	UniProt_SwissProt	Q9CZX8	61	16076	3	2	3	2	0.79	RecName: Full=40S ribosomal protein S19;
57	1	UniProt_SwissProt	Q99LP6	59	24520	7	3	6	3	0.78	RecName: Full=GrpE protein homolog 1, mitochondrial; AltName: Full=Mt-GrpE#1; Flags: Precursor;
31	1	UniProt_SwissProt	P14206	87	32931	5	4	5	4	0.77	RecName: Full=40S ribosomal protein SA; AltName: Full=37 kDa laminin receptor precursor; Short=37LRP; AltName: Full=37 kDa oncofetal antigen; AltName: Full=37/67 kDa laminin receptor; Short=LRP/LR; AltName: Full=67 kDa laminin receptor; Short=67LR; AltName: Full=Laminin receptor 1; Short=LamR; AltName: Full=Laminin-binding protein precursor p40; Short=LBP/p40; AltName: Full=OFA/iLRP;
7	1	UniProt_SwissProt	Q7TPV4	195	152854	43	20	36	17	0.75	RecName: Full=Myb-binding protein 1A; AltName: Full=Myb-binding protein of 160 kDa;
21	2	UniProt_SwissProt	P49312	113	34289	8	4	6	4	0.73	RecName: Full=Heterogeneous nuclear ribonucleoprotein A1; Short=hnRNP A1; AltName: Full=HDP-1; AltName: Full=Helix-destabilizing protein; AltName: Full=Single-strand-binding protein; AltName: Full=Topoisomerase-inhibitor suppressed; AltName: Full=hnRNP core protein A1; Contains: RecName: Full=Heterogeneous nuclear ribonucleoprotein A1, N-terminally processed;
26	1	UniProt_SwissProt	P47962	97	34607	6	5	5	4	0.73	RecName: Full=60S ribosomal protein L5;
17	4	UniProt_SwissProt	Q922U2	102	61957	11	8	10	7	0.71	RecName: Full=Keratin, type II cytoskeletal 5; AltName: Full=Cytokeratin-5; Short=CK-5; AltName: Full=Keratin-5; Short=K5; AltName: Full=Type-II keratin Kb5;
46	1	UniProt_SwissProt	P62983	67	18282	4	2	4	2	0.67	RecName: Full=Ubiquitin-40S ribosomal protein S27a; AltName: Full=Ubiquitin carboxyl extension protein 80; Contains: RecName: Full=Ubiquitin; Contains: RecName: Full=40S ribosomal protein S27a; Flags: Precursor;
143	1	UniProt_SwissProt	Q9CQR2	39	9250	1	1	1	1	0.65	RecName: Full=40S ribosomal protein S21;
39	1	UniProt_SwissProt	P60335	73	37987	4	4	3	3	0.65	RecName: Full=Poly(rC)-binding protein 1; AltName: Full=Alpha-CP1; AltName: Full=Heterogeneous nuclear ribonucleoprotein E1; Short=hnRNP E1;
16	1	UniProt_SwissProt	P02535	156	57906	10	6	8	5	0.63	RecName: Full=Keratin, type I cytoskeletal 10; AltName: Full=56 kDa cytokeratin; AltName: Full=Cytokeratin-10; Short=CK-10; AltName: Full=Keratin, type I cytoskeletal 59 kDa; AltName: Full=Keratin-10; Short=K10;
22	1	UniProt_SwissProt	Q61656	119	69760	12	7	10	7	0.61	RecName: Full=Probable ATP-dependent RNA helicase DDX5; EC=3.6.4.13; AltName: Full=DEAD box RNA helicase DEAD1; Short=mDEAD1; AltName: Full=DEAD box protein 5; AltName: Full=RNA helicase p68;
129	1	UniProt_SwissProt	Q6ZWU9	43	9797	1	1	1	1	0.6	RecName: Full=40S ribosomal protein S27;
6	1	UniProt_SwissProt	Q7TQH0	195	110865	20	11	18	11	0.6	RecName: Full=Ataxin-2-like protein;
21	4	UniProt_SwissProt	Q9CX86	62	30683	4	3	3	3	0.59	RecName: Full=Heterogeneous nuclear ribonucleoprotein A0; Short=hnRNP A0;
29	1	UniProt_SwissProt	P57776	93	31388	3	3	3	3	0.57	RecName: Full=Elongation factor 1-delta; Short=EF-1-delta;
19	1	UniProt_SwissProt	P09405	145	76734	14	7	13	7	0.54	RecName: Full=Nucleolin; AltName: Full=Protein C23;
38	1	UniProt_SwissProt	Q61937	74	32711	8	3	7	3	0.54	RecName: Full=Nucleophosmin; Short=NPM; AltName: Full=Nucleolar phosphoprotein B23; AltName: Full=Nucleolar protein NO38; AltName: Full=Numatrin;
12	2	UniProt_SwissProt	P43275	79	21772	3	2	3	2	0.54	RecName: Full=Histone H1.1; AltName: Full=H1 VAR.3; AltName: Full=Histone H1a; Short=H1a;
49	1	UniProt_SwissProt	Q9D0R8	66	21972	2	2	2	2	0.53	RecName: Full=Protein LSM12 homolog;
16	2	UniProt_SwissProt	P19001	86	44515	6	4	6	4	0.53	RecName: Full=Keratin, type I cytoskeletal 19; AltName: Full=Cytokeratin-19; Short=CK-19; AltName: Full=Keratin-19; Short=K19;
12	3	UniProt_SwissProt	P43276	61	22562	4	2	4	2	0.52	RecName: Full=Histone H1.5; AltName: Full=H1 VAR.5; AltName: Full=H1b;
11	1	UniProt_SwissProt	P38647	169	73701	16	6	14	6	0.47	RecName: Full=Stress-70 protein, mitochondrial; AltName: Full=75 kDa glucose-regulated protein; Short=GRP-75; AltName: Full=Heat shock 70 kDa protein 9; AltName: Full=Mortalin; AltName: Full=Peptide-binding protein 74; Short=PBP74; AltName: Full=p66 MOT; Flags: Precursor;
72	1	UniProt_SwissProt	P50136	55	50624	7	4	7	4	0.45	RecName: Full=2-oxoisovalerate dehydrogenase subunit alpha, mitochondrial; EC=1.2.4.4; AltName: Full=Branched-chain alpha-keto acid dehydrogenase E1 component alpha chain; Short=BCKDE1A; Short=BCKDH E1-alpha; Flags: Precursor;
183	1	UniProt_SwissProt	O55142	31	12660	2	1	2	1	0.44	RecName: Full=60S ribosomal protein L35a;
41	1	UniProt_SwissProt	P83882	69	12718	1	1	1	1	0.44	RecName: Full=60S ribosomal protein L36a; AltName: Full=60S ribosomal protein L44;
21	3	UniProt_SwissProt	Q8BG05	84	39856	4	3	3	3	0.43	RecName: Full=Heterogeneous nuclear ribonucleoprotein A3; Short=hnRNP A3;
24	1	UniProt_SwissProt	P14733	111	66973	9	5	9	5	0.43	RecName: Full=Lamin-B1; Flags: Precursor;
147	1	UniProt_SwissProt	P62315	39	13273	2	1	2	1	0.42	RecName: Full=Small nuclear ribonucleoprotein Sm D1; Short=Sm-D1; AltName: Full=Sm-D autoantigen; AltName: Full=snRNP core protein D1;
170	1	UniProt_SwissProt	P0C0S6	34	13545	5	1	3	1	0.41	RecName: Full=Histone H2A.Z; Short=H2A/z;
85	1	UniProt_SwissProt	P62852	50	13791	1	1	1	1	0.4	RecName: Full=40S ribosomal protein S25;
102	1	UniProt_SwissProt	P40630	47	28198	4	2	4	2	0.4	RecName: Full=Transcription factor A, mitochondrial; Short=mtTFA; AltName: Full=Testis-specific high mobility group protein; Short=TS-HMG; Flags: Precursor;
17	1	UniProt_SwissProt	Q3TTY5	153	71336	7	6	6	5	0.39	RecName: Full=Keratin, type II cytoskeletal 2 epidermal; AltName: Full=Cytokeratin-2e; Short=CK-2e; AltName: Full=Epithelial keratin-2e; AltName: Full=Keratin-2 epidermis; AltName: Full=Keratin-2e; Short=K2e; AltName: Full=Type-II keratin Kb2;
121	1	UniProt_SwissProt	P62900	44	14454	2	1	2	1	0.38	RecName: Full=60S ribosomal protein L31;
40	1	UniProt_SwissProt	Q99MN9	71	58999	13	5	12	4	0.38	RecName: Full=Propionyl-CoA carboxylase beta chain, mitochondrial; Short=PCCase subunit beta; EC=6.4.1.3; AltName: Full=Propanoyl-CoA:carbon dioxide ligase subunit beta; Flags: Precursor;
118	1	UniProt_SwissProt	Q6ZWV7	45	14544	1	1	1	1	0.38	RecName: Full=60S ribosomal protein L35;
17	2	UniProt_SwissProt	Q6NXH9	136	59502	4	4	4	4	0.38	RecName: Full=Keratin, type II cytoskeletal 73; AltName: Full=Cytokeratin-73; Short=CK-73; AltName: Full=Keratin-73; Short=K73; AltName: Full=Type II inner root sheath-specific keratin-K6irs3; AltName: Full=Type-II keratin Kb36;
128	1	UniProt_SwissProt	P67984	43	14807	1	1	1	1	0.37	RecName: Full=60S ribosomal protein L22; AltName: Full=Heparin-binding protein HBp15;
51	1	UniProt_SwissProt	P62702	63	29807	4	2	4	2	0.37	RecName: Full=40S ribosomal protein S4, X isoform;
151	1	UniProt_SwissProt	P63323	38	14858	2	1	2	1	0.37	RecName: Full=40S ribosomal protein S12;
173	1	UniProt_SwissProt	P62830	33	14970	1	1	1	1	0.37	RecName: Full=60S ribosomal protein L23;
73	1	UniProt_SwissProt	P60843	55	46353	6	3	6	3	0.36	RecName: Full=Eukaryotic initiation factor 4A-I; Short=eIF-4A-I; Short=eIF4A-I; EC=3.6.4.13; AltName: Full=ATP-dependent RNA helicase eIF4A-1;
133	1	UniProt_SwissProt	P63276	41	15571	1	1	1	1	0.35	RecName: Full=40S ribosomal protein S17;
16	3	UniProt_SwissProt	Q9QWL7	51	48417	4	3	4	3	0.34	RecName: Full=Keratin, type I cytoskeletal 17; AltName: Full=Cytokeratin-17; Short=CK-17; AltName: Full=Keratin-17; Short=K17;
17	3	UniProt_SwissProt	P04104	115	66079	6	4	5	4	0.33	RecName: Full=Keratin, type II cytoskeletal 1; AltName: Full=67 kDa cytokeratin; AltName: Full=Cytokeratin-1; Short=CK-1; AltName: Full=Keratin-1; Short=K1; AltName: Full=Type-II keratin Kb1;
25	1	UniProt_SwissProt	P99024	108	50095	5	3	4	3	0.33	RecName: Full=Tubulin beta-5 chain;
158	1	UniProt_SwissProt	P14115	37	16709	1	1	1	1	0.32	RecName: Full=60S ribosomal protein L27a; AltName: Full=L29;
34	1	UniProt_SwissProt	Q80UW2	86	33940	2	2	2	2	0.32	RecName: Full=F-box only protein 2;
100	1	UniProt_SwissProt	P61255	47	17248	4	1	4	1	0.31	RecName: Full=60S ribosomal protein L26; AltName: Full=Silica-induced gene 20 protein; Short=SIG-20;
90	1	UniProt_SwissProt	P47915	49	17633	1	1	1	1	0.3	RecName: Full=60S ribosomal protein L29;
81	1	UniProt_SwissProt	P62270	51	17708	3	1	3	1	0.3	RecName: Full=40S ribosomal protein S18; AltName: Full=Ke-3; Short=Ke3;
136	1	UniProt_SwissProt	Q8BP67	40	17882	1	1	1	1	0.3	RecName: Full=60S ribosomal protein L24;
10	2	UniProt_SwissProt	P20029	64	72492	7	4	6	4	0.3	RecName: Full=78 kDa glucose-regulated protein; Short=GRP-78; AltName: Full=Heat shock 70 kDa protein 5; AltName: Full=Immunoglobulin heavy chain-binding protein; Short=BiP; Flags: Precursor;
22	3	UniProt_SwissProt	Q62167	47	73455	7	4	6	4	0.29	RecName: Full=ATP-dependent RNA helicase DDX3X; EC=3.6.4.13; AltName: Full=D1Pas1-related sequence 2; AltName: Full=DEAD box RNA helicase DEAD3; Short=mDEAD3; AltName: Full=DEAD box protein 3, X-chromosomal; AltName: Full=Embryonic RNA helicase;
169	1	UniProt_SwissProt	P63325	35	18904	1	1	1	1	0.28	RecName: Full=40S ribosomal protein S10;
83	1	UniProt_SwissProt	P62137	51	38257	3	2	2	2	0.28	RecName: Full=Serine/threonine-protein phosphatase PP1-alpha catalytic subunit; Short=PP-1A; EC=3.1.3.16;
17	5	UniProt_SwissProt	Q8VED5	78	57802	4	3	4	3	0.28	RecName: Full=Keratin, type II cytoskeletal 79; AltName: Full=Cytokeratin-79; Short=CK-79; AltName: Full=Keratin-79; Short=K79; AltName: Full=Type-II keratin Kb38;
156	1	UniProt_SwissProt	P84104	37	19546	4	1	4	1	0.27	RecName: Full=Serine/arginine-rich splicing factor 3; AltName: Full=Pre-mRNA-splicing factor SRP20; AltName: Full=Protein X16; AltName: Full=Splicing factor, arginine/serine-rich 3;
69	1	UniProt_SwissProt	P80318	56	61162	4	3	4	3	0.26	RecName: Full=T-complex protein 1 subunit gamma; Short=TCP-1-gamma; AltName: Full=CCT-gamma; AltName: Full=Matricin; AltName: Full=mTRiC-P5;
131	1	UniProt_SwissProt	Q8VCM4	42	42746	2	2	2	2	0.25	RecName: Full=Lipoyltransferase 1, mitochondrial; EC=2.3.1.-; AltName: Full=Lipoate biosynthesis protein; AltName: Full=Lipoate-protein ligase; AltName: Full=Lipoyl ligase; Flags: Precursor;
112	1	UniProt_SwissProt	Q7TNV0	45	43360	2	2	2	2	0.24	RecName: Full=Protein DEK;
165	1	UniProt_SwissProt	Q61171	35	21936	1	1	1	1	0.24	RecName: Full=Peroxiredoxin-2; EC=1.11.1.15; AltName: Full=Thiol-specific antioxidant protein; Short=TSA; AltName: Full=Thioredoxin peroxidase 1; AltName: Full=Thioredoxin-dependent peroxide reductase 1;
33	1	UniProt_SwissProt	Q9CY58	86	44801	5	2	5	2	0.23	RecName: Full=Plasminogen activator inhibitor 1 RNA-binding protein; AltName: Full=PAI1 RNA-binding protein 1; Short=PAI-RBP1; AltName: Full=SERPINE1 mRNA-binding protein 1;
113	1	UniProt_SwissProt	Q6ZWN5	45	22635	3	1	3	1	0.23	RecName: Full=40S ribosomal protein S9;
63	1	UniProt_SwissProt	Q9D1J3	57	23575	3	1	3	1	0.22	RecName: Full=SAP domain-containing ribonucleoprotein; AltName: Full=Nuclear protein Hcc-1;
79	1	UniProt_SwissProt	P84099	52	23565	1	1	1	1	0.22	RecName: Full=60S ribosomal protein L19;
115	1	UniProt_SwissProt	O88574	45	23559	2	1	2	1	0.22	RecName: Full=Histone deacetylase complex subunit SAP30; AltName: Full=30 kDa Sin3-associated polypeptide; AltName: Full=Sin3 corepressor complex subunit SAP30; AltName: Full=Sin3-associated polypeptide p30;
45	1	UniProt_SwissProt	Q9CR57	67	23663	2	1	2	1	0.22	RecName: Full=60S ribosomal protein L14;
87	1	UniProt_SwissProt	P27048	50	23811	1	1	1	1	0.22	RecName: Full=Small nuclear ribonucleoprotein-associated protein B; Short=snRNP-B; Short=snRPB; AltName: Full=Sm protein B; Short=Sm-B; Short=SmB;
98	1	UniProt_SwissProt	P47963	48	24348	2	1	2	1	0.21	RecName: Full=60S ribosomal protein L13; AltName: Full=A52;
110	1	UniProt_SwissProt	Q9D2G2	45	49306	6	2	5	2	0.21	RecName: Full=Dihydrolipoyllysine-residue succinyltransferase component of 2-oxoglutarate dehydrogenase complex, mitochondrial; EC=2.3.1.61; AltName: Full=2-oxoglutarate dehydrogenase complex component E2; Short=OGDC-E2; AltName: Full=Dihydrolipoamide succinyltransferase component of 2-oxoglutarate dehydrogenase complex; AltName: Full=E2K; Flags: Precursor;
36	1	UniProt_SwissProt	Q8VDW0	82	49549	2	2	2	2	0.21	RecName: Full=ATP-dependent RNA helicase DDX39A; EC=3.6.4.13; AltName: Full=DEAD box protein 39;
75	1	UniProt_SwissProt	P70333	54	49533	2	2	2	2	0.21	RecName: Full=Heterogeneous nuclear ribonucleoprotein H2; Short=hnRNP H2; AltName: Full=Heterogeneous nuclear ribonucleoprotein H'; Short=hnRNP H'; Contains: RecName: Full=Heterogeneous nuclear ribonucleoprotein H2, N-terminally processed;
146	1	UniProt_SwissProt	O70251	39	24849	3	1	3	1	0.21	RecName: Full=Elongation factor 1-beta; Short=EF-1-beta;
27	1	UniProt_SwissProt	Q8VIJ6	94	75508	7	3	7	3	0.21	RecName: Full=Splicing factor, proline- and glutamine-rich; AltName: Full=DNA-binding p52/p100 complex, 100 kDa subunit; AltName: Full=Polypyrimidine tract-binding protein-associated-splicing factor; Short=PSF; Short=PTB-associated-splicing factor;
68	1	UniProt_SwissProt	Q9D8N0	56	50371	6	2	6	2	0.21	RecName: Full=Elongation factor 1-gamma; Short=EF-1-gamma; AltName: Full=eEF-1B gamma;
166	1	UniProt_SwissProt	P53026	35	25072	1	1	1	1	0.21	RecName: Full=60S ribosomal protein L10a; AltName: Full=CSA-19; AltName: Full=Neural precursor cell expressed developmentally down-regulated protein 6; Short=NEDD-6;
77	1	UniProt_SwissProt	P60122	53	50524	3	2	3	2	0.21	RecName: Full=RuvB-like 1; EC=3.6.4.12; AltName: Full=49 kDa TATA box-binding protein-interacting protein; Short=49 kDa TBP-interacting protein; AltName: Full=DNA helicase p50; AltName: Full=Pontin 52; AltName: Full=TIP49a;
71	1	UniProt_SwissProt	Q62093	55	25461	2	1	2	1	0.2	RecName: Full=Serine/arginine-rich splicing factor 2; AltName: Full=Protein PR264; AltName: Full=Putative myelin regulatory factor 1; Short=MRF-1; AltName: Full=Splicing component, 35 kDa; AltName: Full=Splicing factor SC35; Short=SC-35; AltName: Full=Splicing factor, arginine/serine-rich 2;
99	1	UniProt_SwissProt	Q9D0E1	48	77940	4	3	4	3	0.2	RecName: Full=Heterogeneous nuclear ribonucleoprotein M; Short=hnRNP M;
101	1	UniProt_SwissProt	P20152	47	53712	4	2	4	2	0.19	RecName: Full=Vimentin;
55	1	UniProt_SwissProt	P62908	61	26828	7	1	7	1	0.19	RecName: Full=40S ribosomal protein S3;
116	1	UniProt_SwissProt	O08583	45	26924	3	1	2	1	0.19	RecName: Full=THO complex subunit 4; Short=Tho4; AltName: Full=Ally of AML-1 and LEF-1; AltName: Full=Aly/REF export factor; AltName: Full=REF1-I; AltName: Full=RNA and export factor-binding protein 1; AltName: Full=Transcriptional coactivator Aly/REF;
92	1	UniProt_SwissProt	Q8K202	48	54513	4	2	4	2	0.19	RecName: Full=DNA-directed RNA polymerase I subunit RPA49; Short=RNA polymerase I subunit A49; AltName: Full=DNA-directed RNA polymerase I subunit E; AltName: Full=RNA polymerase I-associated factor 1; AltName: Full=RNA polymerase I-associated factor 53;
123	1	UniProt_SwissProt	P54823	44	54556	4	2	4	2	0.19	RecName: Full=Probable ATP-dependent RNA helicase DDX6; EC=3.6.4.13; AltName: Full=ATP-dependent RNA helicase p54; AltName: Full=DEAD box protein 6; AltName: Full=Oncogene RCK homolog;
164	1	UniProt_SwissProt	P62918	36	28235	1	1	1	1	0.18	RecName: Full=60S ribosomal protein L8;
54	1	UniProt_SwissProt	Q01320	61	173480	14	6	12	6	0.18	RecName: Full=DNA topoisomerase 2-alpha; EC=5.99.1.3; AltName: Full=DNA topoisomerase II, alpha isozyme;
76	1	UniProt_SwissProt	P62754	53	28834	3	1	3	1	0.18	RecName: Full=40S ribosomal protein S6; AltName: Full=Phosphoprotein NP33;
130	1	UniProt_SwissProt	P80317	42	58424	3	2	3	2	0.18	RecName: Full=T-complex protein 1 subunit zeta; Short=TCP-1-zeta; AltName: Full=CCT-zeta-1;
67	1	UniProt_SwissProt	Q99JF8	56	59774	2	2	2	2	0.17	RecName: Full=PC4 and SFRS1-interacting protein; AltName: Full=Lens epithelium-derived growth factor; Short=mLEDGF;
58	1	UniProt_SwissProt	Q62318	59	90558	8	3	6	3	0.17	RecName: Full=Transcription intermediary factor 1-beta; Short=TIF1-beta; AltName: Full=E3 SUMO-protein ligase TRIM28; EC=6.3.2.-; AltName: Full=KRAB-A-interacting protein; AltName: Full=KRIP-1; AltName: Full=Tripartite motif-containing protein 28;
150	1	UniProt_SwissProt	P12970	38	30129	3	1	3	1	0.17	RecName: Full=60S ribosomal protein L7a; AltName: Full=Surfeit locus protein 3;
161	1	UniProt_SwissProt	P97351	36	30094	2	1	2	1	0.17	RecName: Full=40S ribosomal protein S3a; AltName: Full=Protein TU-11;
157	1	UniProt_SwissProt	P14148	37	31457	2	1	2	1	0.16	RecName: Full=60S ribosomal protein L7;
139	1	UniProt_SwissProt	P25444	40	31497	1	1	1	1	0.16	RecName: Full=40S ribosomal protein S2; AltName: Full=40S ribosomal protein S4; AltName: Full=Protein LLRep3;
154	1	UniProt_SwissProt	O88477	37	63753	5	2	5	2	0.16	RecName: Full=Insulin-like growth factor 2 mRNA-binding protein 1; Short=IGF2 mRNA-binding protein 1; Short=IMP-1; AltName: Full=Coding region determinant-binding protein; Short=CRD-BP; AltName: Full=IGF-II mRNA-binding protein 1; AltName: Full=VICKZ family member 1; AltName: Full=Zipcode-binding protein 1; Short=ZBP-1;
126	1	UniProt_SwissProt	Q8CCS6	44	32391	1	1	1	1	0.16	RecName: Full=Polyadenylate-binding protein 2; Short=PABP-2; Short=Poly(A)-binding protein 2; AltName: Full=Nuclear poly(A)-binding protein 1; AltName: Full=Poly(A)-binding protein II; Short=PABII; AltName: Full=Polyadenylate-binding nuclear protein 1;
89	1	UniProt_SwissProt	Q64012	49	33339	3	1	3	1	0.15	RecName: Full=RNA-binding protein Raly; AltName: Full=Maternally-expressed hnRNP C-related protein; AltName: Full=hnRNP associated with lethal yellow protein;
163	1	UniProt_SwissProt	O55125	36	33570	1	1	1	1	0.15	RecName: Full=Protein NipSnap homolog 1; Short=NipSnap1;
174	1	UniProt_SwissProt	P62996	33	33760	2	1	2	1	0.15	RecName: Full=Transformer-2 protein homolog beta; Short=TRA-2 beta; Short=TRA2-beta; AltName: Full=Silica-induced gene 41 protein; Short=SIG-41; AltName: Full=Splicing factor, arginine/serine-rich 10; AltName: Full=Transformer-2 protein homolog B;
95	1	UniProt_SwissProt	P14869	48	34366	1	1	1	1	0.15	RecName: Full=60S acidic ribosomal protein P0; AltName: Full=60S ribosomal protein L10E;
61	1	UniProt_SwissProt	P29341	58	70854	4	2	4	2	0.14	RecName: Full=Polyadenylate-binding protein 1; Short=PABP-1; Short=Poly(A)-binding protein 1;
122	1	UniProt_SwissProt	P48036	44	35787	1	1	1	1	0.14	RecName: Full=Annexin A5; AltName: Full=Anchorin CII; AltName: Full=Annexin V; AltName: Full=Annexin-5; AltName: Full=Calphobindin I; Short=CBP-I; AltName: Full=Endonexin II; AltName: Full=Lipocortin V; AltName: Full=Placental anticoagulant protein 4; Short=PP4; AltName: Full=Placental anticoagulant protein I; Short=PAP-I; AltName: Full=Thromboplastin inhibitor; AltName: Full=Vascular anticoagula…
144	1	UniProt_SwissProt	P16858	39	36072	2	1	2	1	0.14	RecName: Full=Glyceraldehyde-3-phosphate dehydrogenase; Short=GAPDH; EC=1.2.1.12; AltName: Full=Peptidyl-cysteine S-nitrosylase GAPDH; EC=2.6.99.-;
82	1	UniProt_SwissProt	P70372	51	36317	6	1	6	1	0.14	RecName: Full=ELAV-like protein 1; AltName: Full=Elav-like generic protein; AltName: Full=Hu-antigen R; Short=HuR; AltName: Full=MelG;
22	2	UniProt_SwissProt	Q501J6	57	72981	3	2	2	2	0.14	RecName: Full=Probable ATP-dependent RNA helicase DDX17; EC=3.6.4.13; AltName: Full=DEAD box protein 17;
47	1	UniProt_SwissProt	Q5F2E7	66	75668	4	2	4	2	0.13	RecName: Full=Nuclear fragile X mental retardation-interacting protein 2; AltName: Full=82 kDa FMRP-interacting protein; Short=82-FIP; AltName: Full=FMRP-interacting protein 2;
119	1	UniProt_SwissProt	Q9JKB3	45	38790	1	1	1	1	0.13	RecName: Full=Y-box-binding protein 3; AltName: Full=Cold shock domain-containing protein A; AltName: Full=DNA-binding protein A; AltName: Full=Y-box protein 3;
108	1	UniProt_SwissProt	Q60865	46	78292	3	2	3	2	0.13	RecName: Full=Caprin-1; AltName: Full=Cytoplasmic activation- and proliferation-associated protein 1; AltName: Full=GPI-anchored membrane protein 1; AltName: Full=GPI-anchored protein p137; Short=GPI-p137; Short=p137GPI; AltName: Full=Membrane component chromosome 11 surface marker 1; AltName: Full=RNA granule protein 105;
64	1	UniProt_SwissProt	Q8BJM7	57	82858	2	2	2	2	0.12	RecName: Full=tRNA wybutosine-synthesizing protein 1 homolog; AltName: Full=Radical S-adenosyl methionine and flavodoxin domain-containing protein 1; AltName: Full=tRNA-yW-synthesizing protein;
65	1	UniProt_SwissProt	Q05920	57	130344	5	3	5	3	0.12	RecName: Full=Pyruvate carboxylase, mitochondrial; EC=6.4.1.1; AltName: Full=Pyruvic carboxylase; Short=PCB; Flags: Precursor;
80	1	UniProt_SwissProt	Q9CXY6	52	43263	1	1	1	1	0.12	RecName: Full=Interleukin enhancer-binding factor 2; AltName: Full=Nuclear factor of activated T-cells 45 kDa;
43	1	UniProt_SwissProt	Q8K4Z5	69	88546	7	2	7	2	0.11	RecName: Full=Splicing factor 3A subunit 1; AltName: Full=SF3a120;
138	1	UniProt_SwissProt	Q921F2	40	44918	2	1	2	1	0.11	RecName: Full=TAR DNA-binding protein 43; Short=TDP-43;
171	1	UniProt_SwissProt	Q8BG81	33	46332	1	1	1	1	0.11	RecName: Full=Polymerase delta-interacting protein 3; AltName: Full=S6K1 Aly/REF-like target; Short=SKAR;
149	1	UniProt_SwissProt	P27659	38	46366	2	1	2	1	0.11	RecName: Full=60S ribosomal protein L3; AltName: Full=J1 protein;
159	1	UniProt_SwissProt	Q91VC3	37	47095	3	1	3	1	0.11	RecName: Full=Eukaryotic initiation factor 4A-III; Short=eIF-4A-III; Short=eIF4A-III; EC=3.6.4.13; AltName: Full=ATP-dependent RNA helicase DDX48; AltName: Full=ATP-dependent RNA helicase eIF4A-3; AltName: Full=DEAD box protein 48; AltName: Full=Eukaryotic translation initiation factor 4A isoform 3; Contains: RecName: Full=Eukaryotic initiation factor 4A-III, N-terminally processed;
142	1	UniProt_SwissProt	Q9D8E6	39	47409	2	1	2	1	0.11	RecName: Full=60S ribosomal protein L4;
124	1	UniProt_SwissProt	P32067	44	47898	2	1	2	1	0.1	RecName: Full=Lupus La protein homolog; AltName: Full=La autoantigen homolog; AltName: Full=La ribonucleoprotein;
135	1	UniProt_SwissProt	Q9Z2N8	41	47931	5	1	4	1	0.1	RecName: Full=Actin-like protein 6A; AltName: Full=53 kDa BRG1-associated factor A; AltName: Full=Actin-related protein Baf53a; AltName: Full=BRG1-associated factor 53A; Short=BAF53A;
152	1	UniProt_SwissProt	Q60972	38	47911	1	1	1	1	0.1	RecName: Full=Histone-binding protein RBBP4; AltName: Full=Chromatin assembly factor 1 subunit C; Short=CAF-1 subunit C; AltName: Full=Chromatin assembly factor I p48 subunit; Short=CAF-I 48 kDa subunit; Short=CAF-I p48; AltName: Full=Nucleosome-remodeling factor subunit RBAP48; AltName: Full=Retinoblastoma-binding protein 4; Short=RBBP-4; AltName: Full=Retinoblastoma-binding protein p48;
155	1	UniProt_SwissProt	Q60749	37	48511	3	1	3	1	0.1	RecName: Full=KH domain-containing, RNA-binding, signal transduction-associated protein 1; AltName: Full=GAP-associated tyrosine phosphoprotein p62; AltName: Full=Src-associated in mitosis 68 kDa protein; Short=Sam68; AltName: Full=p21 Ras GTPase-activating protein-associated p62; AltName: Full=p68;
84	1	UniProt_SwissProt	P70168	51	98377	2	2	2	2	0.1	RecName: Full=Importin subunit beta-1; AltName: Full=Karyopherin subunit beta-1; AltName: Full=Nuclear factor p97; AltName: Full=Pore targeting complex 97 kDa subunit; Short=PTAC97; AltName: Full=SCG;
178	1	UniProt_SwissProt	Q60759	32	49088	1	1	1	1	0.1	RecName: Full=Glutaryl-CoA dehydrogenase, mitochondrial; Short=GCD; EC=1.3.8.6; Flags: Precursor;
56	1	UniProt_SwissProt	Q61029	59	50399	2	1	2	1	0.1	RecName: Full=Lamina-associated polypeptide 2, isoforms beta/delta/epsilon/gamma; AltName: Full=Thymopoietin isoforms beta/delta/epsilon/gamma; Short=TP beta/delta/epsilon/gamma;
184	1	UniProt_SwissProt	P61979	30	51230	1	1	1	1	0.1	RecName: Full=Heterogeneous nuclear ribonucleoprotein K; Short=hnRNP K;
105	1	UniProt_SwissProt	P97379	47	54112	2	1	2	1	0.09	RecName: Full=Ras GTPase-activating protein-binding protein 2; Short=G3BP-2; AltName: Full=GAP SH3 domain-binding protein 2;
114	1	UniProt_SwissProt	Q9DBR1	45	109588	3	2	3	2	0.09	RecName: Full=5'-3' exoribonuclease 2; EC=3.1.13.-; AltName: Full=Protein Dhm1;
109	1	UniProt_SwissProt	O09106	46	55610	4	1	4	1	0.09	RecName: Full=Histone deacetylase 1; Short=HD1; EC=3.5.1.98;
132	1	UniProt_SwissProt	Q99KP6	42	55661	2	1	2	1	0.09	RecName: Full=Pre-mRNA-processing factor 19; AltName: Full=Nuclear matrix protein 200; AltName: Full=PRP19/PSO4 homolog; AltName: Full=Senescence evasion factor;
97	1	UniProt_SwissProt	P56480	48	56265	1	1	1	1	0.09	RecName: Full=ATP synthase subunit beta, mitochondrial; EC=3.6.3.14; Flags: Precursor;
160	1	UniProt_SwissProt	P17225	36	56671	4	1	3	1	0.09	RecName: Full=Polypyrimidine tract-binding protein 1; Short=PTB; AltName: Full=Heterogeneous nuclear ribonucleoprotein I; Short=hnRNP I;
35	1	UniProt_SwissProt	P16546	84	285221	12	5	12	5	0.09	RecName: Full=Spectrin alpha chain, non-erythrocytic 1; AltName: Full=Alpha-II spectrin; AltName: Full=Fodrin alpha chain;
74	1	UniProt_SwissProt	P52293	55	58234	3	1	3	1	0.08	RecName: Full=Importin subunit alpha-1; AltName: Full=Importin alpha P1; AltName: Full=Karyopherin subunit alpha-2; AltName: Full=Pendulin; AltName: Full=Pore targeting complex 58 kDa subunit; Short=PTAC58; AltName: Full=RAG cohort protein 1; AltName: Full=SRP1-alpha;
167	1	UniProt_SwissProt	P80315	35	58543	5	1	5	1	0.08	RecName: Full=T-complex protein 1 subunit delta; Short=TCP-1-delta; AltName: Full=A45; AltName: Full=CCT-delta;
37	1	UniProt_SwissProt	Q60597	76	117572	7	2	7	2	0.08	RecName: Full=2-oxoglutarate dehydrogenase, mitochondrial; EC=1.2.4.2; AltName: Full=2-oxoglutarate dehydrogenase complex component E1; Short=OGDC-E1; AltName: Full=Alpha-ketoglutarate dehydrogenase; Flags: Precursor;
134	1	UniProt_SwissProt	Q8VH51	41	59655	1	1	1	1	0.08	RecName: Full=RNA-binding protein 39; AltName: Full=Coactivator of activating protein 1 and estrogen receptors; Short=Coactivator of AP-1 and ERs; AltName: Full=RNA-binding motif protein 39; AltName: Full=RNA-binding region-containing protein 2; AltName: Full=Transcription coactivator CAPER;
91	1	UniProt_SwissProt	P80316	49	60042	1	1	1	1	0.08	RecName: Full=T-complex protein 1 subunit epsilon; Short=TCP-1-epsilon; AltName: Full=CCT-epsilon;
106	1	UniProt_SwissProt	Q3TKT4	46	181827	8	3	7	3	0.08	RecName: Full=Transcription activator BRG1; EC=3.6.4.-; AltName: Full=ATP-dependent helicase SMARCA4; AltName: Full=BRG1-associated factor 190A; Short=BAF190A; AltName: Full=Protein brahma homolog 1; AltName: Full=SNF2-beta; AltName: Full=SWI/SNF-related matrix-associated actin-dependent regulator of chromatin subfamily A member 4;
181	1	UniProt_SwissProt	P11983	31	60867	1	1	1	1	0.08	RecName: Full=T-complex protein 1 subunit alpha; Short=TCP-1-alpha; AltName: Full=CCT-alpha; AltName: Full=Tailless complex polypeptide 1A; Short=TCP-1-A; AltName: Full=Tailless complex polypeptide 1B; Short=TCP-1-B;
66	1	UniProt_SwissProt	P63038	56	61088	3	1	3	1	0.08	RecName: Full=60 kDa heat shock protein, mitochondrial; AltName: Full=60 kDa chaperonin; AltName: Full=Chaperonin 60; Short=CPN60; AltName: Full=HSP-65; AltName: Full=Heat shock protein 60; Short=HSP-60; Short=Hsp60; AltName: Full=Mitochondrial matrix protein P1; Flags: Precursor;
175	1	UniProt_SwissProt	P46061	33	64005	2	1	2	1	0.08	RecName: Full=Ran GTPase-activating protein 1; Short=RanGAP1;
162	1	UniProt_SwissProt	Q8R081	36	64550	3	1	3	1	0.08	RecName: Full=Heterogeneous nuclear ribonucleoprotein L; Short=hnRNP L;
103	1	UniProt_SwissProt	Q9D6Z1	47	64880	1	1	1	1	0.08	RecName: Full=Nucleolar protein 56; AltName: Full=Nucleolar protein 5A;
141	1	UniProt_SwissProt	Q7TSY8	40	131850	6	2	6	2	0.07	RecName: Full=Shugoshin-like 2; AltName: Full=Shugoshin-2; Short=Sgo2;
44	1	UniProt_SwissProt	O08784	67	135035	6	2	6	2	0.07	RecName: Full=Treacle protein; AltName: Full=Treacher Collins syndrome protein homolog;
177	1	UniProt_SwissProt	Q8CHY6	32	67634	2	1	2	1	0.07	RecName: Full=Transcriptional repressor p66 alpha; AltName: Full=GATA zinc finger domain-containing protein 2A;
127	1	UniProt_SwissProt	Q9JLZ6	43	67694	1	1	1	1	0.07	RecName: Full=Hypermethylated in cancer 2 protein; Short=Hic-2;
78	1	UniProt_SwissProt	Q9EQ61	53	68209	1	1	1	1	0.07	RecName: Full=Pescadillo homolog;
179	1	UniProt_SwissProt	Q8C2Q3	32	69577	2	1	2	1	0.07	RecName: Full=RNA-binding protein 14; AltName: Full=RNA-binding motif protein 14;
28	1	UniProt_SwissProt	P07724	94	70700	1	1	1	1	0.07	RecName: Full=Serum albumin; Flags: Precursor;
140	1	UniProt_SwissProt	Q99K43	40	70930	3	1	3	1	0.07	RecName: Full=Protein regulator of cytokinesis 1;
153	1	UniProt_SwissProt	Q3U9G9	38	71965	1	1	1	1	0.07	RecName: Full=Lamin-B receptor; AltName: Full=Integral nuclear envelope inner membrane protein;
59	1	UniProt_SwissProt	Q61464	59	219196	4	3	3	2	0.07	RecName: Full=Zinc finger protein 638; AltName: Full=Nuclear protein 220; AltName: Full=Zinc finger matrin-like protein;
117	1	UniProt_SwissProt	Q99NB9	45	146465	3	2	3	2	0.07	RecName: Full=Splicing factor 3B subunit 1; AltName: Full=Pre-mRNA-splicing factor SF3b 155 kDa subunit; Short=SF3b155; AltName: Full=Spliceosome-associated protein 155; Short=SAP 155;
125	1	UniProt_SwissProt	Q9QWT9	44	74678	8	1	8	1	0.07	RecName: Full=Kinesin-like protein KIFC1;
168	1	UniProt_SwissProt	O70133	35	150692	6	2	6	2	0.07	RecName: Full=ATP-dependent RNA helicase A; Short=RHA; EC=3.6.4.13; AltName: Full=DEAH box protein 9; Short=mHEL-5; AltName: Full=Nuclear DNA helicase II; Short=NDH II;
111	1	UniProt_SwissProt	P11499	45	83571	4	1	4	1	0.06	RecName: Full=Heat shock protein HSP 90-beta; AltName: Full=Heat shock 84 kDa; Short=HSP 84; Short=HSP84; AltName: Full=Tumor-specific transplantation 84 kDa antigen; Short=TSTA;
48	1	UniProt_SwissProt	Q8BJL1	66	84573	1	1	1	1	0.06	RecName: Full=F-box only protein 30;
52	1	UniProt_SwissProt	Q1HFZ0	62	86252	1	1	1	1	0.06	RecName: Full=tRNA (cytosine(34)-C(5))-methyltransferase; EC=2.1.1.203; AltName: Full=Myc-induced SUN domain-containing protein; Short=Misu; AltName: Full=NOL1/NOP2/Sun domain family member 2;
185	1	UniProt_SwissProt	Q9WTX6	30	90319	2	1	2	1	0.05	RecName: Full=Cullin-1; Short=CUL-1;
86	1	UniProt_SwissProt	Q62261	50	274908	13	3	12	3	0.05	RecName: Full=Spectrin beta chain, non-erythrocytic 1; AltName: Full=Beta-II spectrin; AltName: Full=Embryonic liver fodrin; AltName: Full=Fodrin beta chain;
172	1	UniProt_SwissProt	Q9JIK5	33	94120	5	1	5	1	0.05	RecName: Full=Nucleolar RNA helicase 2; EC=3.6.4.13; AltName: Full=DEAD box protein 21; AltName: Full=Gu-alpha; AltName: Full=Nucleolar RNA helicase Gu; AltName: Full=Nucleolar RNA helicase II; AltName: Full=RH II/Gu;
137	1	UniProt_SwissProt	Q8K310	40	95085	2	1	2	1	0.05	RecName: Full=Matrin-3;
145	1	UniProt_SwissProt	P57780	39	105368	4	1	4	1	0.05	RecName: Full=Alpha-actinin-4; AltName: Full=F-actin cross-linking protein; AltName: Full=Non-muscle alpha-actinin 4;
107	1	UniProt_SwissProt	Q9R1C7	46	108698	2	1	2	1	0.04	RecName: Full=Pre-mRNA-processing factor 40 homolog A; AltName: Full=Formin-binding protein 11; Short=FBP-11; AltName: Full=Formin-binding protein 3;
182	1	UniProt_SwissProt	P11103	31	113827	4	1	4	1	0.04	RecName: Full=Poly [ADP-ribose] polymerase 1; Short=PARP-1; EC=2.4.2.30; AltName: Full=ADP-ribosyltransferase diphtheria toxin-like 1; Short=ARTD1; AltName: Full=NAD(+) ADP-ribosyltransferase 1; Short=ADPRT 1; AltName: Full=Poly[ADP-ribose] synthase 1; Short=msPARP;
94	1	UniProt_SwissProt	Q8BX22	48	114635	4	1	4	1	0.04	RecName: Full=Sal-like protein 4; AltName: Full=Zinc finger protein SALL4;
180	1	UniProt_SwissProt	P97496	31	123326	7	1	6	1	0.04	RecName: Full=SWI/SNF complex subunit SMARCC1; AltName: Full=BRG1-associated factor 155; AltName: Full=SWI/SNF complex 155 kDa subunit; AltName: Full=SWI/SNF-related matrix-associated actin-dependent regulator of chromatin subfamily C member 1; AltName: Full=SWI3-related protein; Short=BAF155;
148	1	UniProt_SwissProt	Q921M3	38	136548	2	1	2	1	0.04	RecName: Full=Splicing factor 3B subunit 3; AltName: Full=Pre-mRNA-splicing factor SF3b 130 kDa subunit; Short=SF3b130; AltName: Full=Spliceosome-associated protein 130; Short=SAP 130;
93	1	UniProt_SwissProt	Q99PV0	48	274754	5	2	5	2	0.04	RecName: Full=Pre-mRNA-processing-splicing factor 8; AltName: Full=Splicing factor Prp8;
176	1	UniProt_SwissProt	Q6PDQ2	33	219096	3	1	3	1	0.02	RecName: Full=Chromodomain-helicase-DNA-binding protein 4; Short=CHD-4; EC=3.6.4.12;
62	1	UniProt_SwissProt	P60330	58	236765	2	1	2	1	0.02	RecName: Full=Separin; EC=3.4.22.49; AltName: Full=Caspase-like protein ESPL1; AltName: Full=Extra spindle poles-like 1 protein; AltName: Full=Separase;
120	1	UniProt_SwissProt	Q6P4T2	44	246045	2	1	2	1	0.02	RecName: Full=U5 small nuclear ribonucleoprotein 200 kDa helicase; EC=3.6.4.13; AltName: Full=BRR2 homolog; AltName: Full=U5 snRNP-specific 200 kDa protein; Short=U5-200KD;
104	1	UniProt_SwissProt	Q8C9B9	47	248621	1	1	1	1	0.02	RecName: Full=Death-inducer obliterator 1; Short=DIO-1; AltName: Full=Death-associated transcription factor 1; Short=DATF-1;
96	1	UniProt_SwissProt	Q6PR54	48	268116	6	1	6	1	0.02	RecName: Full=Telomere-associated protein RIF1; AltName: Full=Rap1-interacting factor 1 homolog; Short=mRif1;

## Sheet: EV_2
User	bmk
Search title	QE0325_EDimitrova_rerun_9.mgf
MS data file	D:\MGFs\11_2014\QE0325_EDimitrova_rerun_9.mgf
Database	UniProt_SwissProt 20131208
Taxonomy	Mus musculus (house mouse) (16,642 sequences)
Timestamp	25 Nov 2014 at 09:26:50 GMT
Type of search	MS/MS Ion Search
Enzyme	Trypsin
Fixed modifications	Carbamidomethyl (C)
Variable modifications	Deamidated (N),Deamidated (Q),Oxidation (M)
Mass values	Monoisotopic
Protein mass	Unrestricted
Peptide mass tolerance	10 ppm
Fragment mass tolerance	0.05 Da
Max missed cleavages	1
Instrument type	Q-Exactive
Number of queries	5148
Significance threshold p<	0.000701
Max. number of families	AUTO
Ions score or expect cut-off	20
Preferred taxonomy	All entries
Show Percolator scores?	no
Family	Member	Database	Accession	Score	Mass	Num. of matches	Num. of significant matches	Num. of sequences	Num. of significant sequences	emPAI	Description
1	1	UniProt_SwissProt	P53395	525	53555	69	34	22	18	4.84	RecName: Full=Lipoamide acyltransferase component of branched-chain alpha-keto acid dehydrogenase complex, mitochondrial; EC=2.3.1.168; AltName: Full=Branched-chain alpha-keto acid dehydrogenase complex component E2; Short=BCKAD-E2; Short=BCKADE2; AltName: Full=Dihydrolipoamide acetyltransferase component of branched-chain alpha-keto acid dehydrogenase complex; AltName: Full=Dihydrolipoamide bran…
34	1	UniProt_SwissProt	P62806	73	11360	8	6	6	4	4.13	RecName: Full=Histone H4;
2	1	UniProt_SwissProt	Q3ULD5	414	61910	44	22	24	15	2.66	RecName: Full=Methylcrotonoyl-CoA carboxylase beta chain, mitochondrial; Short=MCCase subunit beta; EC=6.4.1.4; AltName: Full=3-methylcrotonyl-CoA carboxylase 2; AltName: Full=3-methylcrotonyl-CoA carboxylase non-biotin-containing subunit; AltName: Full=3-methylcrotonyl-CoA:carbon dioxide ligase subunit beta; Flags: Precursor;
6	1	UniProt_SwissProt	Q99MR8	209	79692	42	21	26	17	2.09	RecName: Full=Methylcrotonoyl-CoA carboxylase subunit alpha, mitochondrial; Short=MCCase subunit alpha; EC=6.4.1.4; AltName: Full=3-methylcrotonyl-CoA carboxylase 1; AltName: Full=3-methylcrotonyl-CoA carboxylase biotin-containing subunit; AltName: Full=3-methylcrotonyl-CoA:carbon dioxide ligase subunit alpha; Flags: Precursor;
4	1	UniProt_SwissProt	Q91ZA3	372	80498	45	22	28	17	1.88	RecName: Full=Propionyl-CoA carboxylase alpha chain, mitochondrial; Short=PCCase subunit alpha; EC=6.4.1.3; AltName: Full=Propanoyl-CoA:carbon dioxide ligase subunit alpha; Flags: Precursor;
12	1	UniProt_SwissProt	Q9WTX5	118	18831	5	4	5	4	1.69	RecName: Full=S-phase kinase-associated protein 1; AltName: Full=Cyclin-A/CDK2-associated protein p19; AltName: Full=S-phase kinase-associated protein 1A; AltName: Full=p19A; AltName: Full=p19skp1;
3	1	UniProt_SwissProt	Q99MN9	376	58999	26	15	18	10	1.61	RecName: Full=Propionyl-CoA carboxylase beta chain, mitochondrial; Short=PCCase subunit beta; EC=6.4.1.3; AltName: Full=Propanoyl-CoA:carbon dioxide ligase subunit beta; Flags: Precursor;
38	1	UniProt_SwissProt	Q99LP6	71	24520	14	5	9	5	1.6	RecName: Full=GrpE protein homolog 1, mitochondrial; AltName: Full=Mt-GrpE#1; Flags: Precursor;
43	1	UniProt_SwissProt	P18608	62	10146	4	2	3	2	1.49	RecName: Full=Non-histone chromosomal protein HMG-14; AltName: Full=High mobility group nucleosome-binding domain-containing protein 1;
5	1	UniProt_SwissProt	P02535	229	57906	22	13	9	8	1.26	RecName: Full=Keratin, type I cytoskeletal 10; AltName: Full=56 kDa cytokeratin; AltName: Full=Cytokeratin-10; Short=CK-10; AltName: Full=Keratin, type I cytoskeletal 59 kDa; AltName: Full=Keratin-10; Short=K10;
15	1	UniProt_SwissProt	O88569	111	37437	13	7	11	5	1.13	RecName: Full=Heterogeneous nuclear ribonucleoproteins A2/B1; Short=hnRNP A2/B1;
5	3	UniProt_SwissProt	P19001	161	44515	13	7	8	6	1.1	RecName: Full=Keratin, type I cytoskeletal 19; AltName: Full=Cytokeratin-19; Short=CK-19; AltName: Full=Keratin-19; Short=K19;
5	2	UniProt_SwissProt	Q9Z2K1	187	51973	15	10	7	6	1.07	RecName: Full=Keratin, type I cytoskeletal 16; AltName: Full=Cytokeratin-16; Short=CK-16; AltName: Full=Keratin-16; Short=K16;
5	4	UniProt_SwissProt	P08730	112	48066	15	7	8	7	0.99	RecName: Full=Keratin, type I cytoskeletal 13; AltName: Full=47 kDa cytokeratin; AltName: Full=Cytokeratin-13; Short=CK-13; AltName: Full=Keratin-13; Short=K13;
21	1	UniProt_SwissProt	Q6ZWY9	93	13898	8	3	4	2	0.95	RecName: Full=Histone H2B type 1-C/E/G;
19	1	UniProt_SwissProt	Q61937	97	32711	10	4	8	4	0.78	RecName: Full=Nucleophosmin; Short=NPM; AltName: Full=Nucleolar phosphoprotein B23; AltName: Full=Nucleolar protein NO38; AltName: Full=Numatrin;
17	1	UniProt_SwissProt	P60710	105	42052	10	5	9	5	0.75	RecName: Full=Actin, cytoplasmic 1; AltName: Full=Beta-actin; Contains: RecName: Full=Actin, cytoplasmic 1, N-terminally processed;
15	2	UniProt_SwissProt	P49312	64	34289	10	5	7	4	0.73	RecName: Full=Heterogeneous nuclear ribonucleoprotein A1; Short=hnRNP A1; AltName: Full=HDP-1; AltName: Full=Helix-destabilizing protein; AltName: Full=Single-strand-binding protein; AltName: Full=Topoisomerase-inhibitor suppressed; AltName: Full=hnRNP core protein A1; Contains: RecName: Full=Heterogeneous nuclear ribonucleoprotein A1, N-terminally processed;
30	1	UniProt_SwissProt	Q61656	77	69760	16	8	15	8	0.72	RecName: Full=Probable ATP-dependent RNA helicase DDX5; EC=3.6.4.13; AltName: Full=DEAD box RNA helicase DEAD1; Short=mDEAD1; AltName: Full=DEAD box protein 5; AltName: Full=RNA helicase p68;
8	1	UniProt_SwissProt	P09405	178	76734	16	8	14	8	0.64	RecName: Full=Nucleolin; AltName: Full=Protein C23;
5	5	UniProt_SwissProt	Q9QWL7	108	48417	11	5	9	5	0.63	RecName: Full=Keratin, type I cytoskeletal 17; AltName: Full=Cytokeratin-17; Short=CK-17; AltName: Full=Keratin-17; Short=K17;
92	1	UniProt_SwissProt	P62307	45	9776	1	1	1	1	0.6	RecName: Full=Small nuclear ribonucleoprotein F; Short=snRNP-F; AltName: Full=Sm protein F; Short=Sm-F; Short=SmF;
9	1	UniProt_SwissProt	P10126	151	50424	21	6	16	5	0.6	RecName: Full=Elongation factor 1-alpha 1; Short=EF-1-alpha-1; AltName: Full=Elongation factor Tu; Short=EF-Tu; AltName: Full=Eukaryotic elongation factor 1 A-1; Short=eEF1A-1;
7	2	UniProt_SwissProt	Q3TTY5	160	71336	14	9	9	6	0.59	RecName: Full=Keratin, type II cytoskeletal 2 epidermal; AltName: Full=Cytokeratin-2e; Short=CK-2e; AltName: Full=Epithelial keratin-2e; AltName: Full=Keratin-2 epidermis; AltName: Full=Keratin-2e; Short=K2e; AltName: Full=Type-II keratin Kb2;
7	3	UniProt_SwissProt	Q6IFZ6	150	61379	10	7	8	6	0.59	RecName: Full=Keratin, type II cytoskeletal 1b; AltName: Full=Cytokeratin-1B; Short=CK-1B; AltName: Full=Embryonic type II keratin-1; AltName: Full=Keratin-77; Short=K77; AltName: Full=Type-II keratin Kb39;
14	1	UniProt_SwissProt	P38647	114	73701	14	7	12	7	0.57	RecName: Full=Stress-70 protein, mitochondrial; AltName: Full=75 kDa glucose-regulated protein; Short=GRP-75; AltName: Full=Heat shock 70 kDa protein 9; AltName: Full=Mortalin; AltName: Full=Peptide-binding protein 74; Short=PBP74; AltName: Full=p66 MOT; Flags: Precursor;
96	1	UniProt_SwissProt	P15864	42	21254	5	2	4	2	0.56	RecName: Full=Histone H1.2; AltName: Full=H1 VAR.1; AltName: Full=H1c;
7	1	UniProt_SwissProt	P04104	197	66079	12	9	6	6	0.54	RecName: Full=Keratin, type II cytoskeletal 1; AltName: Full=67 kDa cytokeratin; AltName: Full=Cytokeratin-1; Short=CK-1; AltName: Full=Keratin-1; Short=K1; AltName: Full=Type-II keratin Kb1;
67	1	UniProt_SwissProt	Q9EQU5	53	33358	8	3	5	3	0.53	RecName: Full=Protein SET; AltName: Full=Phosphatase 2A inhibitor I2PP2A; Short=I-2PP2A; AltName: Full=Template-activating factor I; Short=TAF-I;
47	1	UniProt_SwissProt	P31266	61	59241	7	5	7	5	0.49	RecName: Full=Recombining binding protein suppressor of hairless; AltName: Full=J kappa-recombination signal-binding protein; AltName: Full=RBP-J kappa;
7	4	UniProt_SwissProt	P50446	97	59641	14	5	11	5	0.49	RecName: Full=Keratin, type II cytoskeletal 6A; AltName: Full=Cytokeratin-6A; Short=CK-6A; AltName: Full=Keratin-6-alpha; Short=mK6-alpha; AltName: Full=Keratin-6A; Short=K6A;
64	1	UniProt_SwissProt	P27048	53	23811	3	2	3	2	0.48	RecName: Full=Small nuclear ribonucleoprotein-associated protein B; Short=snRNP-B; Short=snRPB; AltName: Full=Sm protein B; Short=Sm-B; Short=SmB;
7	5	UniProt_SwissProt	Q922U2	87	61957	17	5	16	5	0.46	RecName: Full=Keratin, type II cytoskeletal 5; AltName: Full=Cytokeratin-5; Short=CK-5; AltName: Full=Keratin-5; Short=K5; AltName: Full=Type-II keratin Kb5;
26	1	UniProt_SwissProt	Q8VEK3	85	88661	23	7	17	7	0.45	RecName: Full=Heterogeneous nuclear ribonucleoprotein U; Short=hnRNP U; AltName: Full=Scaffold attachment factor A; Short=SAF-A;
106	1	UniProt_SwissProt	P83940	43	12636	1	1	1	1	0.44	RecName: Full=Transcription elongation factor B polypeptide 1; AltName: Full=Elongin 15 kDa subunit; AltName: Full=Elongin-C; Short=EloC; AltName: Full=RNA polymerase II transcription factor SIII subunit C; AltName: Full=SIII p15; AltName: Full=Stromal membrane-associated protein SMAP1B homolog;
10	1	UniProt_SwissProt	Q05920	144	130344	20	10	19	10	0.44	RecName: Full=Pyruvate carboxylase, mitochondrial; EC=6.4.1.1; AltName: Full=Pyruvic carboxylase; Short=PCB; Flags: Precursor;
54	1	UniProt_SwissProt	O08583	57	26924	4	3	3	2	0.42	RecName: Full=THO complex subunit 4; Short=Tho4; AltName: Full=Ally of AML-1 and LEF-1; AltName: Full=Aly/REF export factor; AltName: Full=REF1-I; AltName: Full=RNA and export factor-binding protein 1; AltName: Full=Transcriptional coactivator Aly/REF;
16	1	UniProt_SwissProt	Q7TQH0	109	110865	16	8	15	8	0.41	RecName: Full=Ataxin-2-like protein;
93	1	UniProt_SwissProt	P40630	45	28198	7	2	7	2	0.4	RecName: Full=Transcription factor A, mitochondrial; Short=mtTFA; AltName: Full=Testis-specific high mobility group protein; Short=TS-HMG; Flags: Precursor;
42	1	UniProt_SwissProt	P62320	63	14021	1	1	1	1	0.39	RecName: Full=Small nuclear ribonucleoprotein Sm D3; Short=Sm-D3; AltName: Full=snRNP core protein D3;
95	1	UniProt_SwissProt	Q8BFU2	45	14113	6	1	4	1	0.39	RecName: Full=Histone H2A type 3;
15	3	UniProt_SwissProt	Q9CX86	61	30683	5	3	4	2	0.36	RecName: Full=Heterogeneous nuclear ribonucleoprotein A0; Short=hnRNP A0;
55	1	UniProt_SwissProt	Q99020	56	30926	3	2	2	2	0.35	RecName: Full=Heterogeneous nuclear ribonucleoprotein A/B; Short=hnRNP A/B; AltName: Full=CArG-binding factor-A; Short=CBF-A;
46	1	UniProt_SwissProt	O55028	62	46786	9	3	5	2	0.35	RecName: Full=[3-methyl-2-oxobutanoate dehydrogenase [lipoamide]] kinase, mitochondrial; EC=2.7.11.4; AltName: Full=Branched-chain alpha-ketoacid dehydrogenase kinase; Short=BCKD-kinase; Short=BCKDHKIN; Flags: Precursor;
110	1	UniProt_SwissProt	P61358	41	15788	2	1	2	1	0.34	RecName: Full=60S ribosomal protein L27;
78	1	UniProt_SwissProt	Q62189	50	31814	5	2	5	2	0.34	RecName: Full=U1 small nuclear ribonucleoprotein A; Short=U1 snRNP A; Short=U1-A; Short=U1A;
28	1	UniProt_SwissProt	Q8R081	81	64550	7	4	6	4	0.34	RecName: Full=Heterogeneous nuclear ribonucleoprotein L; Short=hnRNP L;
48	1	UniProt_SwissProt	Q64012	61	33339	3	2	3	2	0.33	RecName: Full=RNA-binding protein Raly; AltName: Full=Maternally-expressed hnRNP C-related protein; AltName: Full=hnRNP associated with lethal yellow protein;
33	1	UniProt_SwissProt	Q99K48	73	54620	8	3	7	3	0.3	RecName: Full=Non-POU domain-containing octamer-binding protein; Short=NonO protein;
18	1	UniProt_SwissProt	Q62167	101	73455	13	4	12	4	0.29	RecName: Full=ATP-dependent RNA helicase DDX3X; EC=3.6.4.13; AltName: Full=D1Pas1-related sequence 2; AltName: Full=DEAD box RNA helicase DEAD3; Short=mDEAD3; AltName: Full=DEAD box protein 3, X-chromosomal; AltName: Full=Embryonic RNA helicase;
102	1	UniProt_SwissProt	P62983	44	18282	2	1	1	1	0.29	RecName: Full=Ubiquitin-40S ribosomal protein S27a; AltName: Full=Ubiquitin carboxyl extension protein 80; Contains: RecName: Full=Ubiquitin; Contains: RecName: Full=40S ribosomal protein S27a; Flags: Precursor;
15	4	UniProt_SwissProt	Q8BG05	44	39856	6	3	5	2	0.27	RecName: Full=Heterogeneous nuclear ribonucleoprotein A3; Short=hnRNP A3;
7	6	UniProt_SwissProt	Q3UV17	60	63319	8	3	6	3	0.25	RecName: Full=Keratin, type II cytoskeletal 2 oral; AltName: Full=Keratin-76; Short=K76; AltName: Full=Type-II keratin Kb9;
36	1	UniProt_SwissProt	Q9D0R8	71	21972	1	1	1	1	0.24	RecName: Full=Protein LSM12 homolog;
23	1	UniProt_SwissProt	P14733	87	66973	9	3	9	3	0.24	RecName: Full=Lamin-B1; Flags: Precursor;
39	1	UniProt_SwissProt	P63017	70	71055	12	3	11	3	0.22	RecName: Full=Heat shock cognate 71 kDa protein; AltName: Full=Heat shock 70 kDa protein 8;
81	1	UniProt_SwissProt	P84099	49	23565	1	1	1	1	0.22	RecName: Full=60S ribosomal protein L19;
108	1	UniProt_SwissProt	Q9D1J3	41	23575	3	1	3	1	0.22	RecName: Full=SAP domain-containing ribonucleoprotein; AltName: Full=Nuclear protein Hcc-1;
29	1	UniProt_SwissProt	Q9Z2N8	77	47931	4	2	3	2	0.22	RecName: Full=Actin-like protein 6A; AltName: Full=53 kDa BRG1-associated factor A; AltName: Full=Actin-related protein Baf53a; AltName: Full=BRG1-associated factor 53A; Short=BAF53A;
30	2	UniProt_SwissProt	Q501J6	76	72981	8	3	8	3	0.21	RecName: Full=Probable ATP-dependent RNA helicase DDX17; EC=3.6.4.13; AltName: Full=DEAD box protein 17;
88	1	UniProt_SwissProt	Q8VDW0	46	49549	4	3	3	2	0.21	RecName: Full=ATP-dependent RNA helicase DDX39A; EC=3.6.4.13; AltName: Full=DEAD box protein 39;
113	1	UniProt_SwissProt	O35737	41	49454	5	2	5	2	0.21	RecName: Full=Heterogeneous nuclear ribonucleoprotein H; Short=hnRNP H; Contains: RecName: Full=Heterogeneous nuclear ribonucleoprotein H, N-terminally processed;
13	1	UniProt_SwissProt	Q6PB97	116	75508	9	4	8	3	0.21	RecName: Full=F-box/LRR-repeat protein 19; AltName: Full=F-box and leucine-rich repeat protein 19;
33	2	UniProt_SwissProt	Q8VIJ6	53	75508	10	3	9	3	0.21	RecName: Full=Splicing factor, proline- and glutamine-rich; AltName: Full=DNA-binding p52/p100 complex, 100 kDa subunit; AltName: Full=Polypyrimidine tract-binding protein-associated-splicing factor; Short=PSF; Short=PTB-associated-splicing factor;
60	1	UniProt_SwissProt	P60122	56	50524	3	2	3	2	0.21	RecName: Full=RuvB-like 1; EC=3.6.4.12; AltName: Full=49 kDa TATA box-binding protein-interacting protein; Short=49 kDa TBP-interacting protein; AltName: Full=DNA helicase p50; AltName: Full=Pontin 52; AltName: Full=TIP49a;
20	1	UniProt_SwissProt	Q7TPV4	95	152854	12	6	11	6	0.2	RecName: Full=Myb-binding protein 1A; AltName: Full=Myb-binding protein of 160 kDa;
90	1	UniProt_SwissProt	Q62093	46	25461	1	1	1	1	0.2	RecName: Full=Serine/arginine-rich splicing factor 2; AltName: Full=Protein PR264; AltName: Full=Putative myelin regulatory factor 1; Short=MRF-1; AltName: Full=Splicing component, 35 kDa; AltName: Full=Splicing factor SC35; Short=SC-35; AltName: Full=Splicing factor, arginine/serine-rich 2;
71	1	UniProt_SwissProt	O09106	52	55610	4	2	3	2	0.19	RecName: Full=Histone deacetylase 1; Short=HD1; EC=3.5.1.98;
83	1	UniProt_SwissProt	Q9D883	48	28311	1	1	1	1	0.18	RecName: Full=Splicing factor U2AF 35 kDa subunit; AltName: Full=U2 auxiliary factor 35 kDa subunit; AltName: Full=U2 snRNP auxiliary factor small subunit;
7	7	UniProt_SwissProt	Q9Z2T6	42	57377	2	2	2	2	0.18	RecName: Full=Keratin, type II cuticular Hb5; AltName: Full=Keratin-85; Short=K85; AltName: Full=Type II hair keratin Hb5; AltName: Full=Type-II keratin Kb25;
73	1	UniProt_SwissProt	P80315	51	58543	2	2	2	2	0.18	RecName: Full=T-complex protein 1 subunit delta; Short=TCP-1-delta; AltName: Full=A45; AltName: Full=CCT-delta;
31	1	UniProt_SwissProt	Q99JF8	76	59774	2	2	2	2	0.17	RecName: Full=PC4 and SFRS1-interacting protein; AltName: Full=Lens epithelium-derived growth factor; Short=mLEDGF;
74	1	UniProt_SwissProt	P62702	50	29807	2	1	2	1	0.17	RecName: Full=40S ribosomal protein S4, X isoform;
27	1	UniProt_SwissProt	Q62318	83	90558	10	3	8	3	0.17	RecName: Full=Transcription intermediary factor 1-beta; Short=TIF1-beta; AltName: Full=E3 SUMO-protein ligase TRIM28; EC=6.3.2.-; AltName: Full=KRAB-A-interacting protein; AltName: Full=KRIP-1; AltName: Full=Tripartite motif-containing protein 28;
58	1	UniProt_SwissProt	P63038	56	61088	3	2	3	2	0.17	RecName: Full=60 kDa heat shock protein, mitochondrial; AltName: Full=60 kDa chaperonin; AltName: Full=Chaperonin 60; Short=CPN60; AltName: Full=HSP-65; AltName: Full=Heat shock protein 60; Short=HSP-60; Short=Hsp60; AltName: Full=Mitochondrial matrix protein P1; Flags: Precursor;
123	1	UniProt_SwissProt	P25444	36	31497	1	1	1	1	0.16	RecName: Full=40S ribosomal protein S2; AltName: Full=40S ribosomal protein S4; AltName: Full=Protein LLRep3;
32	1	UniProt_SwissProt	O88477	75	63753	5	2	5	2	0.16	RecName: Full=Insulin-like growth factor 2 mRNA-binding protein 1; Short=IGF2 mRNA-binding protein 1; Short=IMP-1; AltName: Full=Coding region determinant-binding protein; Short=CRD-BP; AltName: Full=IGF-II mRNA-binding protein 1; AltName: Full=VICKZ family member 1; AltName: Full=Zipcode-binding protein 1; Short=ZBP-1;
119	1	UniProt_SwissProt	Q9Z2D8	38	32376	2	1	2	1	0.16	RecName: Full=Methyl-CpG-binding domain protein 3; AltName: Full=Methyl-CpG-binding protein MBD3;
114	1	UniProt_SwissProt	P14206	40	32931	1	1	1	1	0.15	RecName: Full=40S ribosomal protein SA; AltName: Full=37 kDa laminin receptor precursor; Short=37LRP; AltName: Full=37 kDa oncofetal antigen; AltName: Full=37/67 kDa laminin receptor; Short=LRP/LR; AltName: Full=67 kDa laminin receptor; Short=67LR; AltName: Full=Laminin receptor 1; Short=LamR; AltName: Full=Laminin-binding protein precursor p40; Short=LBP/p40; AltName: Full=OFA/iLRP;
112	1	UniProt_SwissProt	Q9Z204	41	34421	7	1	5	1	0.15	RecName: Full=Heterogeneous nuclear ribonucleoproteins C1/C2; Short=hnRNP C1/C2;
94	1	UniProt_SwissProt	P16858	45	36072	1	1	1	1	0.14	RecName: Full=Glyceraldehyde-3-phosphate dehydrogenase; Short=GAPDH; EC=1.2.1.12; AltName: Full=Peptidyl-cysteine S-nitrosylase GAPDH; EC=2.6.99.-;
39	2	UniProt_SwissProt	P20029	50	72492	5	2	5	2	0.14	RecName: Full=78 kDa glucose-regulated protein; Short=GRP-78; AltName: Full=Heat shock 70 kDa protein 5; AltName: Full=Immunoglobulin heavy chain-binding protein; Short=BiP; Flags: Precursor;
22	1	UniProt_SwissProt	Q3TKT4	89	181827	12	5	12	5	0.14	RecName: Full=Transcription activator BRG1; EC=3.6.4.-; AltName: Full=ATP-dependent helicase SMARCA4; AltName: Full=BRG1-associated factor 190A; Short=BAF190A; AltName: Full=Protein brahma homolog 1; AltName: Full=SNF2-beta; AltName: Full=SWI/SNF-related matrix-associated actin-dependent regulator of chromatin subfamily A member 4;
70	1	UniProt_SwissProt	P70372	52	36317	3	1	3	1	0.14	RecName: Full=ELAV-like protein 1; AltName: Full=Elav-like generic protein; AltName: Full=Hu-antigen R; Short=HuR; AltName: Full=MelG;
52	1	UniProt_SwissProt	P60335	58	37987	4	1	4	1	0.13	RecName: Full=Poly(rC)-binding protein 1; AltName: Full=Alpha-CP1; AltName: Full=Heterogeneous nuclear ribonucleoprotein E1; Short=hnRNP E1;
76	1	UniProt_SwissProt	P62137	50	38257	1	1	1	1	0.13	RecName: Full=Serine/threonine-protein phosphatase PP1-alpha catalytic subunit; Short=PP-1A; EC=3.1.3.16;
68	1	UniProt_SwissProt	Q02257	53	82490	4	2	4	2	0.12	RecName: Full=Junction plakoglobin; AltName: Full=Desmoplakin III; AltName: Full=Desmoplakin-3;
89	1	UniProt_SwissProt	Q8C570	46	41566	1	1	1	1	0.12	RecName: Full=mRNA export factor; AltName: Full=Rae1 protein homolog; AltName: Full=mRNA-associated protein mrnp 41;
101	1	UniProt_SwissProt	P60762	44	41581	2	1	2	1	0.12	RecName: Full=Mortality factor 4-like protein 1; AltName: Full=MORF-related gene 15 protein; AltName: Full=Testis-expressed gene 189 protein; AltName: Full=Transcription factor-like protein MRG15;
61	1	UniProt_SwissProt	Q8VCM4	55	42746	3	1	3	1	0.12	RecName: Full=Lipoyltransferase 1, mitochondrial; EC=2.3.1.-; AltName: Full=Lipoate biosynthesis protein; AltName: Full=Lipoate-protein ligase; AltName: Full=Lipoyl ligase; Flags: Precursor;
85	1	UniProt_SwissProt	Q6P3A8	48	43651	2	1	1	1	0.11	RecName: Full=2-oxoisovalerate dehydrogenase subunit beta, mitochondrial; EC=1.2.4.4; AltName: Full=Branched-chain alpha-keto acid dehydrogenase E1 component beta chain; Short=BCKDE1B; Short=BCKDH E1-beta; Flags: Precursor;
11	1	UniProt_SwissProt	Q6PR54	125	268116	13	6	12	6	0.11	RecName: Full=Telomere-associated protein RIF1; AltName: Full=Rap1-interacting factor 1 homolog; Short=mRif1;
82	1	UniProt_SwissProt	Q921F2	48	44918	2	1	2	1	0.11	RecName: Full=TAR DNA-binding protein 43; Short=TDP-43;
111	1	UniProt_SwissProt	Q9D7N3	41	45243	1	1	1	1	0.11	RecName: Full=28S ribosomal protein S9, mitochondrial; Short=MRP-S9; Short=S9mt; Flags: Precursor;
66	1	UniProt_SwissProt	Q61103	53	45342	1	1	1	1	0.11	RecName: Full=Zinc finger protein ubi-d4; AltName: Full=Apoptosis response zinc finger protein; AltName: Full=BRG1-associated factor 45D; Short=BAF45D; AltName: Full=D4, zinc and double PHD fingers family 2; AltName: Full=Protein requiem;
109	1	UniProt_SwissProt	Q9Z2X1	41	46043	3	1	3	1	0.11	RecName: Full=Heterogeneous nuclear ribonucleoprotein F; Short=hnRNP F; Contains: RecName: Full=Heterogeneous nuclear ribonucleoprotein F, N-terminally processed;
118	1	UniProt_SwissProt	Q8BG81	38	46332	2	1	2	1	0.11	RecName: Full=Polymerase delta-interacting protein 3; AltName: Full=S6K1 Aly/REF-like target; Short=SKAR;
116	1	UniProt_SwissProt	P60843	40	46353	3	1	3	1	0.11	RecName: Full=Eukaryotic initiation factor 4A-I; Short=eIF-4A-I; Short=eIF4A-I; EC=3.6.4.13; AltName: Full=ATP-dependent RNA helicase eIF4A-1;
57	1	UniProt_SwissProt	Q60972	56	47911	3	1	3	1	0.1	RecName: Full=Histone-binding protein RBBP4; AltName: Full=Chromatin assembly factor 1 subunit C; Short=CAF-1 subunit C; AltName: Full=Chromatin assembly factor I p48 subunit; Short=CAF-I 48 kDa subunit; Short=CAF-I p48; AltName: Full=Nucleosome-remodeling factor subunit RBAP48; AltName: Full=Retinoblastoma-binding protein 4; Short=RBBP-4; AltName: Full=Retinoblastoma-binding protein p48;
122	1	UniProt_SwissProt	P56671	37	49708	2	1	2	1	0.1	RecName: Full=Myc-associated zinc finger protein; Short=MAZI; AltName: Full=Pur-1; AltName: Full=Purine-binding transcription factor;
79	1	UniProt_SwissProt	Q8BFR5	50	49876	1	1	1	1	0.1	RecName: Full=Elongation factor Tu, mitochondrial; Flags: Precursor;
25	1	UniProt_SwissProt	Q62203	85	49994	1	1	1	1	0.1	RecName: Full=Splicing factor 3A subunit 2; AltName: Full=SF3a66; AltName: Full=Spliceosome-associated protein 62; Short=SAP 62;
40	1	UniProt_SwissProt	Q61029	69	50399	2	1	2	1	0.1	RecName: Full=Lamina-associated polypeptide 2, isoforms beta/delta/epsilon/gamma; AltName: Full=Thymopoietin isoforms beta/delta/epsilon/gamma; Short=TP beta/delta/epsilon/gamma;
105	1	UniProt_SwissProt	Q9D8N0	43	50371	3	1	3	1	0.1	RecName: Full=Elongation factor 1-gamma; Short=EF-1-gamma; AltName: Full=eEF-1B gamma;
117	1	UniProt_SwissProt	P50136	39	50624	3	1	3	1	0.1	RecName: Full=2-oxoisovalerate dehydrogenase subunit alpha, mitochondrial; EC=1.2.4.4; AltName: Full=Branched-chain alpha-keto acid dehydrogenase E1 component alpha chain; Short=BCKDE1A; Short=BCKDH E1-alpha; Flags: Precursor;
69	1	UniProt_SwissProt	P05213	52	50804	2	1	2	1	0.1	RecName: Full=Tubulin alpha-1B chain; AltName: Full=Alpha-tubulin 2; AltName: Full=Alpha-tubulin isotype M-alpha-2; AltName: Full=Tubulin alpha-2 chain;
121	1	UniProt_SwissProt	P61979	37	51230	2	1	2	1	0.1	RecName: Full=Heterogeneous nuclear ribonucleoprotein K; Short=hnRNP K;
75	1	UniProt_SwissProt	O08749	50	54751	2	1	2	1	0.09	RecName: Full=Dihydrolipoyl dehydrogenase, mitochondrial; EC=1.8.1.4; AltName: Full=Dihydrolipoamide dehydrogenase; Flags: Precursor;
44	1	UniProt_SwissProt	Q8VE97	62	56061	1	1	1	1	0.09	RecName: Full=Serine/arginine-rich splicing factor 4; AltName: Full=Splicing factor, arginine/serine-rich 4;
72	1	UniProt_SwissProt	Q8BHD7	51	56950	1	1	1	1	0.09	RecName: Full=Polypyrimidine tract-binding protein 3; AltName: Full=Regulator of differentiation 1; Short=Rod1;
97	1	UniProt_SwissProt	Q8BX22	45	114635	7	2	7	2	0.09	RecName: Full=Sal-like protein 4; AltName: Full=Zinc finger protein SALL4;
124	1	UniProt_SwissProt	Q61390	34	58661	2	1	2	1	0.08	RecName: Full=T-complex protein 1 subunit zeta-2; Short=TCP-1-zeta-2; AltName: Full=CCT-zeta-2; Short=Cctz-2;
98	1	UniProt_SwissProt	Q9D554	45	59147	5	1	5	1	0.08	RecName: Full=Splicing factor 3A subunit 3; AltName: Full=SF3a60; AltName: Full=Spliceosome-associated protein 61; Short=SAP 61;
87	1	UniProt_SwissProt	Q03265	47	59830	3	1	3	1	0.08	RecName: Full=ATP synthase subunit alpha, mitochondrial; Flags: Precursor;
53	1	UniProt_SwissProt	P80318	58	61162	3	1	3	1	0.08	RecName: Full=T-complex protein 1 subunit gamma; Short=TCP-1-gamma; AltName: Full=CCT-gamma; AltName: Full=Matricin; AltName: Full=mTRiC-P5;
51	1	UniProt_SwissProt	Q9CSN1	58	61495	1	1	1	1	0.08	RecName: Full=SNW domain-containing protein 1; AltName: Full=Nuclear protein SkiP; AltName: Full=Ski-interacting protein;
35	1	UniProt_SwissProt	P97496	73	123326	7	2	7	2	0.08	RecName: Full=SWI/SNF complex subunit SMARCC1; AltName: Full=BRG1-associated factor 155; AltName: Full=SWI/SNF complex 155 kDa subunit; AltName: Full=SWI/SNF-related matrix-associated actin-dependent regulator of chromatin subfamily C member 1; AltName: Full=SWI3-related protein; Short=BAF155;
100	1	UniProt_SwissProt	Q91W39	44	65508	1	1	1	1	0.07	RecName: Full=Nuclear receptor coactivator 5; Short=NCoA-5; AltName: Full=Coactivator independent of AF-2; Short=CIA;
62	1	UniProt_SwissProt	Q8CHY6	55	67634	3	1	3	1	0.07	RecName: Full=Transcriptional repressor p66 alpha; AltName: Full=GATA zinc finger domain-containing protein 2A;
63	1	UniProt_SwissProt	Q9JLZ6	54	67694	1	1	1	1	0.07	RecName: Full=Hypermethylated in cancer 2 protein; Short=Hic-2;
120	1	UniProt_SwissProt	Q7TMK9	38	69818	3	1	3	1	0.07	RecName: Full=Heterogeneous nuclear ribonucleoprotein Q; Short=hnRNP Q; AltName: Full=Glycine- and tyrosine-rich RNA-binding protein; Short=GRY-RBP; AltName: Full=NS1-associated protein 1; AltName: Full=Synaptotagmin-binding, cytoplasmic RNA-interacting protein; AltName: Full=pp68;
49	1	UniProt_SwissProt	P07724	60	70700	1	1	1	1	0.07	RecName: Full=Serum albumin; Flags: Precursor;
65	1	UniProt_SwissProt	Q9QWT9	53	74678	6	1	6	1	0.07	RecName: Full=Kinesin-like protein KIFC1;
24	1	UniProt_SwissProt	O70133	86	150692	3	2	3	2	0.06	RecName: Full=ATP-dependent RNA helicase A; Short=RHA; EC=3.6.4.13; AltName: Full=DEAH box protein 9; Short=mHEL-5; AltName: Full=Nuclear DNA helicase II; Short=NDH II;
77	1	UniProt_SwissProt	Q3U0V1	50	77184	2	1	2	1	0.06	RecName: Full=Far upstream element-binding protein 2; Short=FUSE-binding protein 2; AltName: Full=KH type-splicing regulatory protein; Short=KSRP;
86	1	UniProt_SwissProt	P48972	48	79738	1	1	1	1	0.06	RecName: Full=Myb-related protein B; Short=B-Myb; AltName: Full=Myb-like protein 2;
115	1	UniProt_SwissProt	O89090	40	81310	1	1	1	1	0.06	RecName: Full=Transcription factor Sp1;
45	1	UniProt_SwissProt	Q8K4B0	62	81432	4	1	4	1	0.06	RecName: Full=Metastasis-associated protein MTA1;
99	1	UniProt_SwissProt	Q8R2M2	44	84682	1	1	1	1	0.06	RecName: Full=Deoxynucleotidyltransferase terminal-interacting protein 2;
50	1	UniProt_SwissProt	Q01320	59	173480	12	2	12	2	0.06	RecName: Full=DNA topoisomerase 2-alpha; EC=5.99.1.3; AltName: Full=DNA topoisomerase II, alpha isozyme;
56	1	UniProt_SwissProt	Q7JJ13	56	88298	1	1	1	1	0.06	RecName: Full=Bromodomain-containing protein 2; AltName: Full=Female sterile homeotic-related protein 1; AltName: Full=Fsrg-1; AltName: Full=Protein RING3;
91	1	UniProt_SwissProt	Q8K4Z5	45	88546	6	1	5	1	0.05	RecName: Full=Splicing factor 3A subunit 1; AltName: Full=SF3a120;
107	1	UniProt_SwissProt	Q8K327	42	88703	1	1	1	1	0.05	RecName: Full=Chromosome alignment-maintaining phosphoprotein 1; AltName: Full=Zinc finger protein 828;
84	1	UniProt_SwissProt	Q61191	48	212188	6	2	5	2	0.05	RecName: Full=Host cell factor 1; Short=HCF; Short=HCF-1; AltName: Full=C1 factor; Contains: RecName: Full=HCF N-terminal chain 1; Contains: RecName: Full=HCF N-terminal chain 2; Contains: RecName: Full=HCF N-terminal chain 3; Contains: RecName: Full=HCF N-terminal chain 4; Contains: RecName: Full=HCF N-terminal chain 5; Contains: RecName: Full=HCF N-terminal chain 6; Contains: RecName: Full=HCF …
104	1	UniProt_SwissProt	Q6PDQ2	43	219096	6	2	6	2	0.04	RecName: Full=Chromodomain-helicase-DNA-binding protein 4; Short=CHD-4; EC=3.6.4.12;
41	1	UniProt_SwissProt	Q9DBR1	65	109588	2	1	2	1	0.04	RecName: Full=5'-3' exoribonuclease 2; EC=3.1.13.-; AltName: Full=Protein Dhm1;
103	1	UniProt_SwissProt	Q9ESZ8	44	112708	2	1	2	1	0.04	RecName: Full=General transcription factor II-I; Short=GTFII-I; Short=TFII-I; AltName: Full=Bruton tyrosine kinase-associated protein 135; Short=BAP-135; Short=BTK-associated protein 135;
59	1	UniProt_SwissProt	Q7TSY8	56	131850	3	1	3	1	0.04	RecName: Full=Shugoshin-like 2; AltName: Full=Shugoshin-2; Short=Sgo2;
37	1	UniProt_SwissProt	Q9ESU6	71	156311	3	1	3	1	0.03	RecName: Full=Bromodomain-containing protein 4; AltName: Full=Mitotic chromosome-associated protein; Short=MCAP;
80	1	UniProt_SwissProt	Q3UQ28	49	167621	1	1	1	1	0.03	RecName: Full=Peroxidasin homolog; EC=1.11.1.7; Flags: Precursor;

## Sheet: FS2-FBXL19_1
User	bmk
Search title	QE0325_EDimitrova_rerun_7.mgf
MS data file	D:\MGFs\11_2014\QE0325_EDimitrova_rerun_7.mgf
Database	UniProt_SwissProt 20131208
Taxonomy	Mus musculus (house mouse) (16,642 sequences)
Timestamp	25 Nov 2014 at 09:31:18 GMT
Type of search	MS/MS Ion Search
Enzyme	Trypsin
Fixed modifications	Carbamidomethyl (C)
Variable modifications	Deamidated (N),Deamidated (Q),Oxidation (M)
Mass values	Monoisotopic
Protein mass	Unrestricted
Peptide mass tolerance	10 ppm
Fragment mass tolerance	0.05 Da
Max missed cleavages	1
Instrument type	Q-Exactive
Number of queries	9193
Significance threshold p<	0.001251
Max. number of families	AUTO
Ions score or expect cut-off	20
Preferred taxonomy	All entries
Show Percolator scores?	no
Family	Member	Database	Accession	Score	Mass	Num. of matches	Num. of significant matches	Num. of sequences	Num. of significant sequences	emPAI	Description
4	1	UniProt_SwissProt	Q9WTX5	606	18831	49	25	14	11	18.56	RecName: Full=S-phase kinase-associated protein 1; AltName: Full=Cyclin-A/CDK2-associated protein p19; AltName: Full=S-phase kinase-associated protein 1A; AltName: Full=p19A; AltName: Full=p19skp1;
1	1	UniProt_SwissProt	Q6PB97	3969	75508	344	208	49	40	15.78	RecName: Full=F-box/LRR-repeat protein 19; AltName: Full=F-box and leucine-rich repeat protein 19;
2	1	UniProt_SwissProt	Q3ULD5	892	61910	60	41	30	24	8.14	RecName: Full=Methylcrotonoyl-CoA carboxylase beta chain, mitochondrial; Short=MCCase subunit beta; EC=6.4.1.4; AltName: Full=3-methylcrotonyl-CoA carboxylase 2; AltName: Full=3-methylcrotonyl-CoA carboxylase non-biotin-containing subunit; AltName: Full=3-methylcrotonyl-CoA:carbon dioxide ligase subunit beta; Flags: Precursor;
6	1	UniProt_SwissProt	Q99MR8	585	79692	70	40	38	28	6.09	RecName: Full=Methylcrotonoyl-CoA carboxylase subunit alpha, mitochondrial; Short=MCCase subunit alpha; EC=6.4.1.4; AltName: Full=3-methylcrotonyl-CoA carboxylase 1; AltName: Full=3-methylcrotonyl-CoA carboxylase biotin-containing subunit; AltName: Full=3-methylcrotonyl-CoA:carbon dioxide ligase subunit alpha; Flags: Precursor;
5	1	UniProt_SwissProt	P53395	591	53555	57	31	27	18	4.84	RecName: Full=Lipoamide acyltransferase component of branched-chain alpha-keto acid dehydrogenase complex, mitochondrial; EC=2.3.1.168; AltName: Full=Branched-chain alpha-keto acid dehydrogenase complex component E2; Short=BCKAD-E2; Short=BCKADE2; AltName: Full=Dihydrolipoamide acetyltransferase component of branched-chain alpha-keto acid dehydrogenase complex; AltName: Full=Dihydrolipoamide bran…
3	1	UniProt_SwissProt	Q91ZA3	699	80498	61	34	37	22	3.35	RecName: Full=Propionyl-CoA carboxylase alpha chain, mitochondrial; Short=PCCase subunit alpha; EC=6.4.1.3; AltName: Full=Propanoyl-CoA:carbon dioxide ligase subunit alpha; Flags: Precursor;
7	1	UniProt_SwissProt	Q99MN9	402	58999	37	25	23	17	3.22	RecName: Full=Propionyl-CoA carboxylase beta chain, mitochondrial; Short=PCCase subunit beta; EC=6.4.1.3; AltName: Full=Propanoyl-CoA:carbon dioxide ligase subunit beta; Flags: Precursor;
33	1	UniProt_SwissProt	Q99LP6	99	24520	13	6	10	6	2.15	RecName: Full=GrpE protein homolog 1, mitochondrial; AltName: Full=Mt-GrpE#1; Flags: Precursor;
18	1	UniProt_SwissProt	P61290	153	29602	13	7	11	7	2.04	RecName: Full=Proteasome activator complex subunit 3; AltName: Full=11S regulator complex subunit gamma; Short=REG-gamma; AltName: Full=Activator of multicatalytic protease subunit 3; AltName: Full=Ki nuclear autoantigen; AltName: Full=Proteasome activator 28 subunit gamma; Short=PA28g; Short=PA28gamma;
9	1	UniProt_SwissProt	P10126	278	50424	22	14	15	10	1.8	RecName: Full=Elongation factor 1-alpha 1; Short=EF-1-alpha-1; AltName: Full=Elongation factor Tu; Short=EF-Tu; AltName: Full=Eukaryotic elongation factor 1 A-1; Short=eEF1A-1;
8	1	UniProt_SwissProt	P63017	306	71055	31	18	24	13	1.71	RecName: Full=Heat shock cognate 71 kDa protein; AltName: Full=Heat shock 70 kDa protein 8;
20	1	UniProt_SwissProt	Q9EQU5	142	33358	11	7	8	7	1.68	RecName: Full=Protein SET; AltName: Full=Phosphatase 2A inhibitor I2PP2A; Short=I-2PP2A; AltName: Full=Template-activating factor I; Short=TAF-I;
36	1	UniProt_SwissProt	P67984	89	14807	6	4	5	3	1.58	RecName: Full=60S ribosomal protein L22; AltName: Full=Heparin-binding protein HBp15;
29	1	UniProt_SwissProt	P62806	107	11360	3	2	3	2	1.27	RecName: Full=Histone H4;
13	3	UniProt_SwissProt	Q9QWL7	122	48417	10	7	9	6	0.98	RecName: Full=Keratin, type I cytoskeletal 17; AltName: Full=Cytokeratin-17; Short=CK-17; AltName: Full=Keratin-17; Short=K17;
108	1	UniProt_SwissProt	Q6ZWY9	49	13898	3	2	3	2	0.95	RecName: Full=Histone H2B type 1-C/E/G;
11	1	UniProt_SwissProt	P38647	237	73701	22	12	18	10	0.9	RecName: Full=Stress-70 protein, mitochondrial; AltName: Full=75 kDa glucose-regulated protein; Short=GRP-75; AltName: Full=Heat shock 70 kDa protein 9; AltName: Full=Mortalin; AltName: Full=Peptide-binding protein 74; Short=PBP74; AltName: Full=p66 MOT; Flags: Precursor;
109	1	UniProt_SwissProt	P63276	49	15571	2	2	2	2	0.82	RecName: Full=40S ribosomal protein S17;
136	1	UniProt_SwissProt	O88574	45	23559	4	3	4	3	0.82	RecName: Full=Histone deacetylase complex subunit SAP30; AltName: Full=30 kDa Sin3-associated polypeptide; AltName: Full=Sin3 corepressor complex subunit SAP30; AltName: Full=Sin3-associated polypeptide p30;
94	1	UniProt_SwissProt	Q62189	51	31814	5	4	5	4	0.81	RecName: Full=U1 small nuclear ribonucleoprotein A; Short=U1 snRNP A; Short=U1-A; Short=U1A;
17	1	UniProt_SwissProt	Q8VEK3	172	88661	28	11	22	11	0.8	RecName: Full=Heterogeneous nuclear ribonucleoprotein U; Short=hnRNP U; AltName: Full=Scaffold attachment factor A; Short=SAF-A;
13	1	UniProt_SwissProt	P02535	227	57906	12	8	10	6	0.77	RecName: Full=Keratin, type I cytoskeletal 10; AltName: Full=56 kDa cytokeratin; AltName: Full=Cytokeratin-10; Short=CK-10; AltName: Full=Keratin, type I cytoskeletal 59 kDa; AltName: Full=Keratin-10; Short=K10;
28	1	UniProt_SwissProt	P60710	107	42052	9	5	9	5	0.75	RecName: Full=Actin, cytoplasmic 1; AltName: Full=Beta-actin; Contains: RecName: Full=Actin, cytoplasmic 1, N-terminally processed;
23	1	UniProt_SwissProt	P80318	128	61162	12	7	10	6	0.72	RecName: Full=T-complex protein 1 subunit gamma; Short=TCP-1-gamma; AltName: Full=CCT-gamma; AltName: Full=Matricin; AltName: Full=mTRiC-P5;
13	2	UniProt_SwissProt	Q61781	168	53176	9	6	7	5	0.7	RecName: Full=Keratin, type I cytoskeletal 14; AltName: Full=Cytokeratin-14; Short=CK-14; AltName: Full=Keratin-14; Short=K14;
13	4	UniProt_SwissProt	P19001	113	44515	6	5	6	5	0.7	RecName: Full=Keratin, type I cytoskeletal 19; AltName: Full=Cytokeratin-19; Short=CK-19; AltName: Full=Keratin-19; Short=K19;
26	1	UniProt_SwissProt	P31266	110	59241	10	6	9	6	0.61	RecName: Full=Recombining binding protein suppressor of hairless; AltName: Full=J kappa-recombination signal-binding protein; AltName: Full=RBP-J kappa;
10	6	UniProt_SwissProt	P50446	97	59641	10	7	9	6	0.61	RecName: Full=Keratin, type II cytoskeletal 6A; AltName: Full=Cytokeratin-6A; Short=CK-6A; AltName: Full=Keratin-6-alpha; Short=mK6-alpha; AltName: Full=Keratin-6A; Short=K6A;
22	1	UniProt_SwissProt	P42932	140	60088	8	6	8	6	0.6	RecName: Full=T-complex protein 1 subunit theta; Short=TCP-1-theta; AltName: Full=CCT-theta;
10	3	UniProt_SwissProt	Q3TTY5	157	71336	12	9	8	6	0.59	RecName: Full=Keratin, type II cytoskeletal 2 epidermal; AltName: Full=Cytokeratin-2e; Short=CK-2e; AltName: Full=Epithelial keratin-2e; AltName: Full=Keratin-2 epidermis; AltName: Full=Keratin-2e; Short=K2e; AltName: Full=Type-II keratin Kb2;
10	5	UniProt_SwissProt	Q922U2	127	61957	16	6	15	6	0.58	RecName: Full=Keratin, type II cytoskeletal 5; AltName: Full=Cytokeratin-5; Short=CK-5; AltName: Full=Keratin-5; Short=K5; AltName: Full=Type-II keratin Kb5;
47	1	UniProt_SwissProt	P57776	74	31388	3	3	3	3	0.57	RecName: Full=Elongation factor 1-delta; Short=EF-1-delta;
40	1	UniProt_SwissProt	Q9Z2D8	79	32376	3	3	3	3	0.55	RecName: Full=Methyl-CpG-binding domain protein 3; AltName: Full=Methyl-CpG-binding protein MBD3;
24	2	UniProt_SwissProt	Q99K48	83	54620	5	5	5	5	0.54	RecName: Full=Non-POU domain-containing octamer-binding protein; Short=NonO protein;
160	1	UniProt_SwissProt	Q9DB15	40	21809	3	2	3	2	0.54	RecName: Full=39S ribosomal protein L12, mitochondrial; Short=L12mt; Short=MRP-L12; Flags: Precursor;
10	1	UniProt_SwissProt	P04104	253	66079	9	9	6	6	0.54	RecName: Full=Keratin, type II cytoskeletal 1; AltName: Full=67 kDa cytokeratin; AltName: Full=Cytokeratin-1; Short=CK-1; AltName: Full=Keratin-1; Short=K1; AltName: Full=Type-II keratin Kb1;
14	1	UniProt_SwissProt	Q7TQH0	199	110865	18	10	18	10	0.53	RecName: Full=Ataxin-2-like protein;
154	1	UniProt_SwissProt	Q99LT0	42	11206	1	1	1	1	0.51	RecName: Full=Protein dpy-30 homolog; AltName: Full=Dpy-30-like protein; Short=Dpy-30L;
10	7	UniProt_SwissProt	Q8VED5	89	57802	6	5	6	5	0.5	RecName: Full=Keratin, type II cytoskeletal 79; AltName: Full=Cytokeratin-79; Short=CK-79; AltName: Full=Keratin-79; Short=K79; AltName: Full=Type-II keratin Kb38;
51	1	UniProt_SwissProt	O55028	70	46786	7	4	5	3	0.5	RecName: Full=[3-methyl-2-oxobutanoate dehydrogenase [lipoamide]] kinase, mitochondrial; EC=2.7.11.4; AltName: Full=Branched-chain alpha-ketoacid dehydrogenase kinase; Short=BCKD-kinase; Short=BCKDHKIN; Flags: Precursor;
49	1	UniProt_SwissProt	Q9D1J3	72	23575	6	2	6	2	0.49	RecName: Full=SAP domain-containing ribonucleoprotein; AltName: Full=Nuclear protein Hcc-1;
25	1	UniProt_SwissProt	Q9Z2N8	116	47931	7	4	6	4	0.48	RecName: Full=Actin-like protein 6A; AltName: Full=53 kDa BRG1-associated factor A; AltName: Full=Actin-related protein Baf53a; AltName: Full=BRG1-associated factor 53A; Short=BAF53A;
146	1	UniProt_SwissProt	P27048	44	23811	3	2	3	2	0.48	RecName: Full=Small nuclear ribonucleoprotein-associated protein B; Short=snRNP-B; Short=snRPB; AltName: Full=Sm protein B; Short=Sm-B; Short=SmB;
13	6	UniProt_SwissProt	P08730	82	48066	7	4	7	4	0.48	RecName: Full=Keratin, type I cytoskeletal 13; AltName: Full=47 kDa cytokeratin; AltName: Full=Cytokeratin-13; Short=CK-13; AltName: Full=Keratin-13; Short=K13;
10	2	UniProt_SwissProt	Q6IFZ6	157	61379	6	6	5	5	0.47	RecName: Full=Keratin, type II cytoskeletal 1b; AltName: Full=Cytokeratin-1B; Short=CK-1B; AltName: Full=Embryonic type II keratin-1; AltName: Full=Keratin-77; Short=K77; AltName: Full=Type-II keratin Kb39;
34	2	UniProt_SwissProt	Q9Z1N5	80	49460	6	4	5	4	0.46	RecName: Full=Spliceosome RNA helicase Ddx39b; EC=3.6.4.13; AltName: Full=56 kDa U2AF65-associated protein; AltName: Full=DEAD box protein UAP56; AltName: Full=HLA-B-associated transcript 1 protein;
34	1	UniProt_SwissProt	Q8VDW0	98	49549	6	5	5	4	0.46	RecName: Full=ATP-dependent RNA helicase DDX39A; EC=3.6.4.13; AltName: Full=DEAD box protein 39;
41	1	UniProt_SwissProt	O88569	78	37437	7	3	6	2	0.46	RecName: Full=Heterogeneous nuclear ribonucleoproteins A2/B1; Short=hnRNP A2/B1;
24	1	UniProt_SwissProt	Q8VIJ6	127	75508	9	7	7	6	0.46	RecName: Full=Splicing factor, proline- and glutamine-rich; AltName: Full=DNA-binding p52/p100 complex, 100 kDa subunit; AltName: Full=Polypyrimidine tract-binding protein-associated-splicing factor; Short=PSF; Short=PTB-associated-splicing factor;
67	1	UniProt_SwissProt	P68372	61	50255	8	4	5	3	0.46	RecName: Full=Tubulin beta-4B chain; AltName: Full=Tubulin beta-2C chain;
163	1	UniProt_SwissProt	P83940	40	12636	1	1	1	1	0.44	RecName: Full=Transcription elongation factor B polypeptide 1; AltName: Full=Elongin 15 kDa subunit; AltName: Full=Elongin-C; Short=EloC; AltName: Full=RNA polymerase II transcription factor SIII subunit C; AltName: Full=SIII p15; AltName: Full=Stromal membrane-associated protein SMAP1B homolog;
125	1	UniProt_SwissProt	P60867	47	13478	2	1	2	1	0.41	RecName: Full=40S ribosomal protein S20;
27	1	UniProt_SwissProt	P97496	108	123326	16	9	14	9	0.41	RecName: Full=SWI/SNF complex subunit SMARCC1; AltName: Full=BRG1-associated factor 155; AltName: Full=SWI/SNF complex 155 kDa subunit; AltName: Full=SWI/SNF-related matrix-associated actin-dependent regulator of chromatin subfamily C member 1; AltName: Full=SWI3-related protein; Short=BAF155;
82	1	UniProt_SwissProt	P62317	56	13632	2	1	2	1	0.41	RecName: Full=Small nuclear ribonucleoprotein Sm D2; Short=Sm-D2; AltName: Full=snRNP core protein D2;
56	1	UniProt_SwissProt	P62320	66	14021	1	1	1	1	0.39	RecName: Full=Small nuclear ribonucleoprotein Sm D3; Short=Sm-D3; AltName: Full=snRNP core protein D3;
19	1	UniProt_SwissProt	Q8BX22	143	114635	12	8	12	8	0.39	RecName: Full=Sal-like protein 4; AltName: Full=Zinc finger protein SALL4;
16	1	UniProt_SwissProt	Q05920	177	130344	21	9	21	9	0.39	RecName: Full=Pyruvate carboxylase, mitochondrial; EC=6.4.1.1; AltName: Full=Pyruvic carboxylase; Short=PCB; Flags: Precursor;
8	2	UniProt_SwissProt	P20029	95	72492	12	6	11	5	0.39	RecName: Full=78 kDa glucose-regulated protein; Short=GRP-78; AltName: Full=Heat shock 70 kDa protein 5; AltName: Full=Immunoglobulin heavy chain-binding protein; Short=BiP; Flags: Precursor;
35	1	UniProt_SwissProt	P80315	97	58543	6	4	6	4	0.38	RecName: Full=T-complex protein 1 subunit delta; Short=TCP-1-delta; AltName: Full=A45; AltName: Full=CCT-delta;
90	1	UniProt_SwissProt	P62900	53	14454	1	1	1	1	0.38	RecName: Full=60S ribosomal protein L31;
10	4	UniProt_SwissProt	Q6NXH9	152	59502	7	5	5	4	0.37	RecName: Full=Keratin, type II cytoskeletal 73; AltName: Full=Cytokeratin-73; Short=CK-73; AltName: Full=Keratin-73; Short=K73; AltName: Full=Type II inner root sheath-specific keratin-K6irs3; AltName: Full=Type-II keratin Kb36;
133	1	UniProt_SwissProt	P63323	45	14858	1	1	1	1	0.37	RecName: Full=40S ribosomal protein S12;
189	1	UniProt_SwissProt	P62830	34	14970	1	1	1	1	0.36	RecName: Full=60S ribosomal protein L23;
43	1	UniProt_SwissProt	P63038	76	61088	6	4	6	4	0.36	RecName: Full=60 kDa heat shock protein, mitochondrial; AltName: Full=60 kDa chaperonin; AltName: Full=Chaperonin 60; Short=CPN60; AltName: Full=HSP-65; AltName: Full=Heat shock protein 60; Short=HSP-60; Short=Hsp60; AltName: Full=Mitochondrial matrix protein P1; Flags: Precursor;
161	1	UniProt_SwissProt	Q9R224	40	15224	2	1	2	1	0.36	RecName: Full=Protein BEX1; AltName: Full=Brain-expressed X-linked protein 1 homolog; AltName: Full=Reduced expression protein 3; Short=REX-3;
151	1	UniProt_SwissProt	P02301	42	15363	3	1	3	1	0.36	RecName: Full=Histone H3.3C; AltName: Full=Embryonic;
52	1	UniProt_SwissProt	Q99020	70	30926	4	2	3	2	0.35	RecName: Full=Heterogeneous nuclear ribonucleoprotein A/B; Short=hnRNP A/B; AltName: Full=CArG-binding factor-A; Short=CBF-A;
120	1	UniProt_SwissProt	P61358	47	15788	1	1	1	1	0.34	RecName: Full=60S ribosomal protein L27;
114	1	UniProt_SwissProt	Q60749	48	48511	3	3	3	3	0.34	RecName: Full=KH domain-containing, RNA-binding, signal transduction-associated protein 1; AltName: Full=GAP-associated tyrosine phosphoprotein p62; AltName: Full=Src-associated in mitosis 68 kDa protein; Short=Sam68; AltName: Full=p21 Ras GTPase-activating protein-associated p62; AltName: Full=p68;
68	1	UniProt_SwissProt	Q9D2G2	61	49306	4	3	3	3	0.33	RecName: Full=Dihydrolipoyllysine-residue succinyltransferase component of 2-oxoglutarate dehydrogenase complex, mitochondrial; EC=2.3.1.61; AltName: Full=2-oxoglutarate dehydrogenase complex component E2; Short=OGDC-E2; AltName: Full=Dihydrolipoamide succinyltransferase component of 2-oxoglutarate dehydrogenase complex; AltName: Full=E2K; Flags: Precursor;
21	1	UniProt_SwissProt	Q3TKT4	140	181827	17	11	17	11	0.33	RecName: Full=Transcription activator BRG1; EC=3.6.4.-; AltName: Full=ATP-dependent helicase SMARCA4; AltName: Full=BRG1-associated factor 190A; Short=BAF190A; AltName: Full=Protein brahma homolog 1; AltName: Full=SNF2-beta; AltName: Full=SWI/SNF-related matrix-associated actin-dependent regulator of chromatin subfamily A member 4;
177	1	UniProt_SwissProt	P62264	38	16434	1	1	1	1	0.33	RecName: Full=40S ribosomal protein S14;
13	5	UniProt_SwissProt	Q6IFX2	108	50444	3	3	3	3	0.32	RecName: Full=Keratin, type I cytoskeletal 42; AltName: Full=Cytokeratin-42; Short=CK-42; AltName: Full=Keratin-17n; AltName: Full=Keratin-42; Short=K42; AltName: Full=Type I keratin Ka22;
117	1	UniProt_SwissProt	P60122	48	50524	5	3	5	3	0.32	RecName: Full=RuvB-like 1; EC=3.6.4.12; AltName: Full=49 kDa TATA box-binding protein-interacting protein; Short=49 kDa TBP-interacting protein; AltName: Full=DNA helicase p50; AltName: Full=Pontin 52; AltName: Full=TIP49a;
30	1	UniProt_SwissProt	Q8CHY6	104	67634	6	4	6	4	0.32	RecName: Full=Transcriptional repressor p66 alpha; AltName: Full=GATA zinc finger domain-containing protein 2A;
46	1	UniProt_SwissProt	P05213	75	50804	3	3	3	3	0.32	RecName: Full=Tubulin alpha-1B chain; AltName: Full=Alpha-tubulin 2; AltName: Full=Alpha-tubulin isotype M-alpha-2; AltName: Full=Tubulin alpha-2 chain;
145	1	UniProt_SwissProt	P49312	44	34289	3	2	3	2	0.32	RecName: Full=Heterogeneous nuclear ribonucleoprotein A1; Short=hnRNP A1; AltName: Full=HDP-1; AltName: Full=Helix-destabilizing protein; AltName: Full=Single-strand-binding protein; AltName: Full=Topoisomerase-inhibitor suppressed; AltName: Full=hnRNP core protein A1; Contains: RecName: Full=Heterogeneous nuclear ribonucleoprotein A1, N-terminally processed;
72	1	UniProt_SwissProt	Q9Z204	60	34421	6	2	5	2	0.31	RecName: Full=Heterogeneous nuclear ribonucleoproteins C1/C2; Short=hnRNP C1/C2;
60	1	UniProt_SwissProt	Q61656	64	69760	10	4	10	4	0.31	RecName: Full=Probable ATP-dependent RNA helicase DDX5; EC=3.6.4.13; AltName: Full=DEAD box RNA helicase DEAD1; Short=mDEAD1; AltName: Full=DEAD box protein 5; AltName: Full=RNA helicase p68;
129	1	UniProt_SwissProt	Q8R3L8	46	53518	6	3	5	3	0.3	RecName: Full=Cyclin-dependent kinase 8; EC=2.7.11.22; EC=2.7.11.23; AltName: Full=Cell division protein kinase 8; AltName: Full=Mediator complex subunit CDK8; AltName: Full=Mediator of RNA polymerase II transcription subunit CDK8;
191	1	UniProt_SwissProt	P62270	30	17708	1	1	1	1	0.3	RecName: Full=40S ribosomal protein S18; AltName: Full=Ke-3; Short=Ke3;
99	1	UniProt_SwissProt	P62983	50	18282	4	1	4	1	0.29	RecName: Full=Ubiquitin-40S ribosomal protein S27a; AltName: Full=Ubiquitin carboxyl extension protein 80; Contains: RecName: Full=Ubiquitin; Contains: RecName: Full=40S ribosomal protein S27a; Flags: Precursor;
91	1	UniProt_SwissProt	Q5F2E7	52	75668	4	4	4	4	0.28	RecName: Full=Nuclear fragile X mental retardation-interacting protein 2; AltName: Full=82 kDa FMRP-interacting protein; Short=82-FIP; AltName: Full=FMRP-interacting protein 2;
42	1	UniProt_SwissProt	P60335	77	37987	4	2	4	2	0.28	RecName: Full=Poly(rC)-binding protein 1; AltName: Full=Alpha-CP1; AltName: Full=Heterogeneous nuclear ribonucleoprotein E1; Short=hnRNP E1;
42	2	UniProt_SwissProt	P57722	47	39554	4	2	4	2	0.27	RecName: Full=Poly(rC)-binding protein 3; AltName: Full=Alpha-CP3;
167	1	UniProt_SwissProt	Q9CXW4	40	20468	2	1	2	1	0.26	RecName: Full=60S ribosomal protein L11;
10	8	UniProt_SwissProt	Q3UV17	84	63319	5	4	4	3	0.25	RecName: Full=Keratin, type II cytoskeletal 2 oral; AltName: Full=Keratin-76; Short=K76; AltName: Full=Type-II keratin Kb9;
115	1	UniProt_SwissProt	P15864	48	21254	2	1	2	1	0.25	RecName: Full=Histone H1.2; AltName: Full=H1 VAR.1; AltName: Full=H1c;
15	1	UniProt_SwissProt	Q7TPV4	189	152854	12	7	11	7	0.24	RecName: Full=Myb-binding protein 1A; AltName: Full=Myb-binding protein of 160 kDa;
38	1	UniProt_SwissProt	Q8K4Z5	81	88546	8	4	7	4	0.24	RecName: Full=Splicing factor 3A subunit 1; AltName: Full=SF3a120;
188	1	UniProt_SwissProt	Q61171	34	21936	1	1	1	1	0.24	RecName: Full=Peroxiredoxin-2; EC=1.11.1.15; AltName: Full=Thiol-specific antioxidant protein; Short=TSA; AltName: Full=Thioredoxin peroxidase 1; AltName: Full=Thioredoxin-dependent peroxide reductase 1;
105	1	UniProt_SwissProt	Q9D0R8	49	21972	1	1	1	1	0.24	RecName: Full=Protein LSM12 homolog;
106	1	UniProt_SwissProt	P62082	49	22113	2	1	2	1	0.24	RecName: Full=40S ribosomal protein S7;
64	1	UniProt_SwissProt	Q924K8	63	67719	4	3	4	3	0.23	RecName: Full=Metastasis-associated protein MTA3;
119	1	UniProt_SwissProt	P35700	48	22390	2	1	2	1	0.23	RecName: Full=Peroxiredoxin-1; EC=1.11.1.15; AltName: Full=Macrophage 23 kDa stress protein; AltName: Full=Osteoblast-specific factor 3; Short=OSF-3; AltName: Full=Thioredoxin peroxidase 2; AltName: Full=Thioredoxin-dependent peroxide reductase 2;
98	1	UniProt_SwissProt	Q62276	51	22439	2	1	2	1	0.23	RecName: Full=Mediator of RNA polymerase II transcription subunit 22; AltName: Full=Mediator complex subunit 22; AltName: Full=Surfeit locus protein 5; Short=Surf-5;
166	1	UniProt_SwissProt	Q62318	40	90558	12	4	9	4	0.23	RecName: Full=Transcription intermediary factor 1-beta; Short=TIF1-beta; AltName: Full=E3 SUMO-protein ligase TRIM28; EC=6.3.2.-; AltName: Full=KRAB-A-interacting protein; AltName: Full=KRIP-1; AltName: Full=Tripartite motif-containing protein 28;
152	1	UniProt_SwissProt	Q6ZWN5	42	22635	5	1	5	1	0.23	RecName: Full=40S ribosomal protein S9;
37	1	UniProt_SwissProt	Q8BG81	86	46332	7	2	7	2	0.23	RecName: Full=Polymerase delta-interacting protein 3; AltName: Full=S6K1 Aly/REF-like target; Short=SKAR;
76	1	UniProt_SwissProt	P60843	58	46353	5	2	4	2	0.23	RecName: Full=Eukaryotic initiation factor 4A-I; Short=eIF-4A-I; Short=eIF4A-I; EC=3.6.4.13; AltName: Full=ATP-dependent RNA helicase eIF4A-1;
103	1	UniProt_SwissProt	P97461	49	23046	1	1	1	1	0.23	RecName: Full=40S ribosomal protein S5; Contains: RecName: Full=40S ribosomal protein S5, N-terminally processed;
62	1	UniProt_SwissProt	Q9QWT9	63	74678	8	3	8	3	0.21	RecName: Full=Kinesin-like protein KIFC1;
45	1	UniProt_SwissProt	Q62203	76	49994	3	2	3	2	0.21	RecName: Full=Splicing factor 3A subunit 2; AltName: Full=SF3a66; AltName: Full=Spliceosome-associated protein 62; Short=SAP 62;
186	1	UniProt_SwissProt	Q8C8M1	36	25441	1	1	1	1	0.2	RecName: Full=Protein FAM60A; AltName: Full=Tera protein;
69	1	UniProt_SwissProt	Q62093	61	25461	1	1	1	1	0.2	RecName: Full=Serine/arginine-rich splicing factor 2; AltName: Full=Protein PR264; AltName: Full=Putative myelin regulatory factor 1; Short=MRF-1; AltName: Full=Splicing component, 35 kDa; AltName: Full=Splicing factor SC35; Short=SC-35; AltName: Full=Splicing factor, arginine/serine-rich 2;
12	1	UniProt_SwissProt	Q6PR54	230	268116	17	10	14	9	0.19	RecName: Full=Telomere-associated protein RIF1; AltName: Full=Rap1-interacting factor 1 homolog; Short=mRif1;
107	1	UniProt_SwissProt	P54823	49	54556	3	2	3	2	0.19	RecName: Full=Probable ATP-dependent RNA helicase DDX6; EC=3.6.4.13; AltName: Full=ATP-dependent RNA helicase p54; AltName: Full=DEAD box protein 6; AltName: Full=Oncogene RCK homolog;
71	1	UniProt_SwissProt	P11499	60	83571	7	3	7	3	0.19	RecName: Full=Heat shock protein HSP 90-beta; AltName: Full=Heat shock 84 kDa; Short=HSP 84; Short=HSP84; AltName: Full=Tumor-specific transplantation 84 kDa antigen; Short=TSTA;
183	1	UniProt_SwissProt	P40630	36	28198	4	1	4	1	0.18	RecName: Full=Transcription factor A, mitochondrial; Short=mtTFA; AltName: Full=Testis-specific high mobility group protein; Short=TS-HMG; Flags: Precursor;
61	1	UniProt_SwissProt	Q9D883	63	28311	2	1	2	1	0.18	RecName: Full=Splicing factor U2AF 35 kDa subunit; AltName: Full=U2 auxiliary factor 35 kDa subunit; AltName: Full=U2 snRNP auxiliary factor small subunit;
112	1	UniProt_SwissProt	P52293	48	58234	4	2	4	2	0.18	RecName: Full=Importin subunit alpha-1; AltName: Full=Importin alpha P1; AltName: Full=Karyopherin subunit alpha-2; AltName: Full=Pendulin; AltName: Full=Pore targeting complex 58 kDa subunit; Short=PTAC58; AltName: Full=RAG cohort protein 1; AltName: Full=SRP1-alpha;
79	1	UniProt_SwissProt	Q9D554	58	59147	7	2	7	2	0.17	RecName: Full=Splicing factor 3A subunit 3; AltName: Full=SF3a60; AltName: Full=Spliceosome-associated protein 61; Short=SAP 61;
118	1	UniProt_SwissProt	Q61792	48	30374	2	1	2	1	0.17	RecName: Full=LIM and SH3 domain protein 1; Short=LASP-1; AltName: Full=Metastatic lymph node gene 50 protein; Short=MLN 50;
168	1	UniProt_SwissProt	Q9CX86	39	30683	1	1	1	1	0.17	RecName: Full=Heterogeneous nuclear ribonucleoprotein A0; Short=hnRNP A0;
165	1	UniProt_SwissProt	P25444	40	31497	2	1	2	1	0.16	RecName: Full=40S ribosomal protein S2; AltName: Full=40S ribosomal protein S4; AltName: Full=Protein LLRep3;
101	1	UniProt_SwissProt	Q8R081	50	64550	5	2	5	2	0.16	RecName: Full=Heterogeneous nuclear ribonucleoprotein L; Short=hnRNP L;
81	1	UniProt_SwissProt	Q61937	56	32711	5	1	5	1	0.15	RecName: Full=Nucleophosmin; Short=NPM; AltName: Full=Nucleolar phosphoprotein B23; AltName: Full=Nucleolar protein NO38; AltName: Full=Numatrin;
86	1	UniProt_SwissProt	Q64012	53	33339	2	1	2	1	0.15	RecName: Full=RNA-binding protein Raly; AltName: Full=Maternally-expressed hnRNP C-related protein; AltName: Full=hnRNP associated with lethal yellow protein;
83	1	UniProt_SwissProt	O55125	54	33570	1	1	1	1	0.15	RecName: Full=Protein NipSnap homolog 1; Short=NipSnap1;
153	1	UniProt_SwissProt	Q62447	42	33618	1	1	1	1	0.15	RecName: Full=Cyclin-C;
181	1	UniProt_SwissProt	P48432	36	34489	1	1	1	1	0.15	RecName: Full=Transcription factor SOX-2;
148	1	UniProt_SwissProt	Q99KB8	43	34519	2	1	2	1	0.15	RecName: Full=Hydroxyacylglutathione hydrolase, mitochondrial; EC=3.1.2.6; AltName: Full=Glyoxalase II; Short=Glx II; Flags: Precursor;
96	1	UniProt_SwissProt	Q9DB40	51	35503	2	1	2	1	0.14	RecName: Full=Mediator of RNA polymerase II transcription subunit 27; AltName: Full=Cofactor required for Sp1 transcriptional activation subunit 8; Short=CRSP complex subunit 8; AltName: Full=Mediator complex subunit 27;
143	1	UniProt_SwissProt	P70372	44	36317	1	1	1	1	0.14	RecName: Full=ELAV-like protein 1; AltName: Full=Elav-like generic protein; AltName: Full=Hu-antigen R; Short=HuR; AltName: Full=MelG;
130	1	UniProt_SwissProt	Q01147	46	36880	1	1	1	1	0.14	RecName: Full=Cyclic AMP-responsive element-binding protein 1; Short=CREB-1; Short=cAMP-responsive element-binding protein 1;
55	1	UniProt_SwissProt	Q99K74	68	111510	4	3	4	3	0.14	RecName: Full=Mediator of RNA polymerase II transcription subunit 24; AltName: Full=Mediator complex subunit 24; AltName: Full=Thyroid hormone receptor-associated protein 4; AltName: Full=Thyroid hormone receptor-associated protein complex 100 kDa component; Short=Trap100; Short=mTRAP100;
64	2	UniProt_SwissProt	Q9R190	50	75724	6	2	6	2	0.13	RecName: Full=Metastasis-associated protein MTA2; AltName: Full=Metastasis-associated 1-like 1;
44	1	UniProt_SwissProt	P09405	76	76734	3	2	3	2	0.13	RecName: Full=Nucleolin; AltName: Full=Protein C23;
135	1	UniProt_SwissProt	P62137	45	38257	3	1	2	1	0.13	RecName: Full=Serine/threonine-protein phosphatase PP1-alpha catalytic subunit; Short=PP-1A; EC=3.1.3.16;
144	1	UniProt_SwissProt	Q8BG05	44	39856	1	1	1	1	0.13	RecName: Full=Heterogeneous nuclear ribonucleoprotein A3; Short=hnRNP A3;
157	1	UniProt_SwissProt	Q62481	41	40987	1	1	1	1	0.12	RecName: Full=Vacuolar protein sorting-associated protein 72 homolog; AltName: Full=Protein YL-1; AltName: Full=Transcription factor-like 1;
63	1	UniProt_SwissProt	Q00PI9	63	85515	3	2	3	2	0.12	RecName: Full=Heterogeneous nuclear ribonucleoprotein U-like protein 2; AltName: Full=MLF1-associated nuclear protein;
92	1	UniProt_SwissProt	Q1HFZ0	52	86252	2	2	2	2	0.12	RecName: Full=tRNA (cytosine(34)-C(5))-methyltransferase; EC=2.1.1.203; AltName: Full=Myc-induced SUN domain-containing protein; Short=Misu; AltName: Full=NOL1/NOP2/Sun domain family member 2;
93	1	UniProt_SwissProt	Q9CXY6	52	43263	1	1	1	1	0.12	RecName: Full=Interleukin enhancer-binding factor 2; AltName: Full=Nuclear factor of activated T-cells 45 kDa;
179	1	UniProt_SwissProt	Q6P3A8	37	43651	2	1	2	1	0.11	RecName: Full=2-oxoisovalerate dehydrogenase subunit beta, mitochondrial; EC=1.2.4.4; AltName: Full=Branched-chain alpha-keto acid dehydrogenase E1 component beta chain; Short=BCKDE1B; Short=BCKDH E1-beta; Flags: Precursor;
84	1	UniProt_SwissProt	Q921F2	53	44918	2	1	2	1	0.11	RecName: Full=TAR DNA-binding protein 43; Short=TDP-43;
174	1	UniProt_SwissProt	Q9QYJ0	38	46344	3	1	3	1	0.11	RecName: Full=DnaJ homolog subfamily A member 2; AltName: Full=mDj3; Flags: Precursor;
70	1	UniProt_SwissProt	O54941	61	46667	1	1	1	1	0.11	RecName: Full=SWI/SNF-related matrix-associated actin-dependent regulator of chromatin subfamily E member 1; AltName: Full=BRG1-associated factor 57; Short=BAF57;
170	1	UniProt_SwissProt	Q60972	39	47911	6	1	5	1	0.1	RecName: Full=Histone-binding protein RBBP4; AltName: Full=Chromatin assembly factor 1 subunit C; Short=CAF-1 subunit C; AltName: Full=Chromatin assembly factor I p48 subunit; Short=CAF-I 48 kDa subunit; Short=CAF-I p48; AltName: Full=Nucleosome-remodeling factor subunit RBAP48; AltName: Full=Retinoblastoma-binding protein 4; Short=RBBP-4; AltName: Full=Retinoblastoma-binding protein p48;
66	1	UniProt_SwissProt	P58252	62	96222	4	2	4	2	0.1	RecName: Full=Elongation factor 2; Short=EF-2;
187	1	UniProt_SwissProt	Q9ERH4	35	48771	1	1	1	1	0.1	RecName: Full=Nucleolar and spindle-associated protein 1; Short=NuSAP;
50	1	UniProt_SwissProt	A2AGH6	71	247144	11	5	11	5	0.1	RecName: Full=Mediator of RNA polymerase II transcription subunit 12; AltName: Full=Mediator complex subunit 12; AltName: Full=OPA-containing protein; AltName: Full=Thyroid hormone receptor-associated protein complex 230 kDa component; Short=Trap230; AltName: Full=Trinucleotide repeat-containing gene 11 protein;
150	1	UniProt_SwissProt	P70333	42	49533	4	1	4	1	0.1	RecName: Full=Heterogeneous nuclear ribonucleoprotein H2; Short=hnRNP H2; AltName: Full=Heterogeneous nuclear ribonucleoprotein H'; Short=hnRNP H'; Contains: RecName: Full=Heterogeneous nuclear ribonucleoprotein H2, N-terminally processed;
176	1	UniProt_SwissProt	P56671	38	49708	2	1	2	1	0.1	RecName: Full=Myc-associated zinc finger protein; Short=MAZI; AltName: Full=Pur-1; AltName: Full=Purine-binding transcription factor;
147	1	UniProt_SwissProt	Q8BFR5	44	49876	2	1	2	1	0.1	RecName: Full=Elongation factor Tu, mitochondrial; Flags: Precursor;
171	1	UniProt_SwissProt	Q9D8N0	39	50371	3	1	3	1	0.1	RecName: Full=Elongation factor 1-gamma; Short=EF-1-gamma; AltName: Full=eEF-1B gamma;
73	1	UniProt_SwissProt	Q9WTM5	59	51252	6	1	5	1	0.1	RecName: Full=RuvB-like 2; EC=3.6.4.12; AltName: Full=p47 protein;
121	1	UniProt_SwissProt	Q8BTV2	47	52150	1	1	1	1	0.09	RecName: Full=Cleavage and polyadenylation specificity factor subunit 7;
75	1	UniProt_SwissProt	Q8CGZ0	58	106501	2	2	2	2	0.09	RecName: Full=Calcium homeostasis endoplasmic reticulum protein; AltName: Full=SR-related CTD-associated factor 6;
178	1	UniProt_SwissProt	Q9R1C7	37	108698	5	2	5	2	0.09	RecName: Full=Pre-mRNA-processing factor 40 homolog A; AltName: Full=Formin-binding protein 11; Short=FBP-11; AltName: Full=Formin-binding protein 3;
110	1	UniProt_SwissProt	O09106	49	55610	2	1	2	1	0.09	RecName: Full=Histone deacetylase 1; Short=HD1; EC=3.5.1.98;
97	1	UniProt_SwissProt	Q8CCF0	51	55623	4	1	4	1	0.09	RecName: Full=U4/U6 small nuclear ribonucleoprotein Prp31; AltName: Full=Pre-mRNA-processing factor 31; AltName: Full=U4/U6 snRNP 61 kDa protein; Short=Protein 61K;
137	1	UniProt_SwissProt	P80314	45	57783	2	1	2	1	0.09	RecName: Full=T-complex protein 1 subunit beta; Short=TCP-1-beta; AltName: Full=CCT-beta;
182	1	UniProt_SwissProt	P80317	36	58424	2	1	2	1	0.08	RecName: Full=T-complex protein 1 subunit zeta; Short=TCP-1-zeta; AltName: Full=CCT-zeta-1;
172	1	UniProt_SwissProt	Q61466	38	58493	3	1	3	1	0.08	RecName: Full=SWI/SNF-related matrix-associated actin-dependent regulator of chromatin subfamily D member 1; AltName: Full=60 kDa BRG-1/Brm-associated factor subunit A; AltName: Full=BRG1-associated factor 60A; Short=BAF60A; AltName: Full=Protein D15KZ1; AltName: Full=SWI/SNF complex 60 kDa subunit;
123	1	UniProt_SwissProt	Q60597	47	117572	6	2	6	2	0.08	RecName: Full=2-oxoglutarate dehydrogenase, mitochondrial; EC=1.2.4.2; AltName: Full=2-oxoglutarate dehydrogenase complex component E1; Short=OGDC-E1; AltName: Full=Alpha-ketoglutarate dehydrogenase; Flags: Precursor;
173	1	UniProt_SwissProt	O88532	38	117926	2	2	2	2	0.08	RecName: Full=Zinc finger RNA-binding protein;
48	1	UniProt_SwissProt	Q8CGY8	74	118131	4	2	4	2	0.08	RecName: Full=UDP-N-acetylglucosamine--peptide N-acetylglucosaminyltransferase 110 kDa subunit; EC=2.4.1.255; AltName: Full=O-GlcNAc transferase subunit p110; AltName: Full=O-linked N-acetylglucosamine transferase 110 kDa subunit; Short=OGT;
100	1	UniProt_SwissProt	Q03265	50	59830	3	1	3	1	0.08	RecName: Full=ATP synthase subunit alpha, mitochondrial; Flags: Precursor;
155	1	UniProt_SwissProt	Q99JF8	42	59774	2	1	2	1	0.08	RecName: Full=PC4 and SFRS1-interacting protein; AltName: Full=Lens epithelium-derived growth factor; Short=mLEDGF;
65	1	UniProt_SwissProt	P80316	62	60042	4	1	4	1	0.08	RecName: Full=T-complex protein 1 subunit epsilon; Short=TCP-1-epsilon; AltName: Full=CCT-epsilon;
169	1	UniProt_SwissProt	P11983	39	60867	4	1	4	1	0.08	RecName: Full=T-complex protein 1 subunit alpha; Short=TCP-1-alpha; AltName: Full=CCT-alpha; AltName: Full=Tailless complex polypeptide 1A; Short=TCP-1-A; AltName: Full=Tailless complex polypeptide 1B; Short=TCP-1-B;
87	1	UniProt_SwissProt	Q9Z1N7	53	61092	1	1	1	1	0.08	RecName: Full=AT-rich interactive domain-containing protein 3B; Short=ARID domain-containing protein 3B; AltName: Full=Bright and dead ringer protein; AltName: Full=Bright-like protein;
158	1	UniProt_SwissProt	Q8BIQ5	41	61416	1	1	1	1	0.08	RecName: Full=Cleavage stimulation factor subunit 2; AltName: Full=CF-1 64 kDa subunit; AltName: Full=Cleavage stimulation factor 64 kDa subunit; Short=CSTF 64 kDa subunit; Short=CstF-64;
131	1	UniProt_SwissProt	Q7TSY8	46	131850	4	2	4	2	0.07	RecName: Full=Shugoshin-like 2; AltName: Full=Shugoshin-2; Short=Sgo2;
80	1	UniProt_SwissProt	O08784	57	135035	3	2	3	2	0.07	RecName: Full=Treacle protein; AltName: Full=Treacher Collins syndrome protein homolog;
95	1	UniProt_SwissProt	Q9JLZ6	51	67694	1	1	1	1	0.07	RecName: Full=Hypermethylated in cancer 2 protein; Short=Hic-2;
180	1	UniProt_SwissProt	Q91WJ8	37	68668	1	1	1	1	0.07	RecName: Full=Far upstream element-binding protein 1; Short=FBP; Short=FUSE-binding protein 1;
162	1	UniProt_SwissProt	Q91X20	40	68777	1	1	1	1	0.07	RecName: Full=Set1/Ash2 histone methyltransferase complex subunit ASH2; AltName: Full=ASH2-like protein;
32	1	UniProt_SwissProt	P07724	102	70700	1	1	1	1	0.07	RecName: Full=Serum albumin; Flags: Precursor;
89	1	UniProt_SwissProt	Q9D620	53	70697	1	1	1	1	0.07	RecName: Full=Rab11 family-interacting protein 1; Short=Rab11-FIP1; AltName: Full=Rab-coupling protein;
74	1	UniProt_SwissProt	Q99K43	59	70930	3	1	3	1	0.07	RecName: Full=Protein regulator of cytokinesis 1;
175	1	UniProt_SwissProt	Q60520	38	145796	7	2	7	2	0.07	RecName: Full=Paired amphipathic helix protein Sin3a; AltName: Full=Histone deacetylase complex subunit Sin3a; AltName: Full=Transcriptional corepressor Sin3a;
53	1	UniProt_SwissProt	Q61464	70	219196	5	3	4	2	0.07	RecName: Full=Zinc finger protein 638; AltName: Full=Nuclear protein 220; AltName: Full=Zinc finger matrin-like protein;
54	1	UniProt_SwissProt	Q8VCD5	68	72930	3	1	3	1	0.07	RecName: Full=Mediator of RNA polymerase II transcription subunit 17; AltName: Full=Cofactor required for Sp1 transcriptional activation subunit 6; Short=CRSP complex subunit 6; AltName: Full=Mediator complex subunit 17; AltName: Full=Thyroid hormone receptor-associated protein complex 80 kDa component;
184	1	UniProt_SwissProt	P59110	36	73149	1	1	1	1	0.07	RecName: Full=Sentrin-specific protease 1; EC=3.4.22.68; AltName: Full=SUMO-1 protease 2; Short=SuPr-2; AltName: Full=Sentrin/SUMO-specific protease SENP1;
190	1	UniProt_SwissProt	Q3V1H1	32	74440	3	1	3	1	0.07	RecName: Full=Cytoskeleton-associated protein 2;
185	1	UniProt_SwissProt	Q3U0V1	36	77184	2	1	2	1	0.06	RecName: Full=Far upstream element-binding protein 2; Short=FUSE-binding protein 2; AltName: Full=KH type-splicing regulatory protein; Short=KSRP;
156	1	UniProt_SwissProt	Q9D0E1	41	77940	2	1	2	1	0.06	RecName: Full=Heterogeneous nuclear ribonucleoprotein M; Short=hnRNP M;
140	1	UniProt_SwissProt	Q8R080	44	79160	3	1	3	1	0.06	RecName: Full=G2 and S phase-expressed protein 1; Short=GTSE-1; AltName: Full=Protein B99;
122	1	UniProt_SwissProt	O89090	47	81310	1	1	1	1	0.06	RecName: Full=Transcription factor Sp1;
139	1	UniProt_SwissProt	Q8BJM7	44	82858	1	1	1	1	0.06	RecName: Full=tRNA wybutosine-synthesizing protein 1 homolog; AltName: Full=Radical S-adenosyl methionine and flavodoxin domain-containing protein 1; AltName: Full=tRNA-yW-synthesizing protein;
134	1	UniProt_SwissProt	Q8BMS1	45	83302	3	1	3	1	0.06	RecName: Full=Trifunctional enzyme subunit alpha, mitochondrial; AltName: Full=TP-alpha; Includes: RecName: Full=Long-chain enoyl-CoA hydratase; EC=4.2.1.17; Includes: RecName: Full=Long chain 3-hydroxyacyl-CoA dehydrogenase; EC=1.1.1.211; Flags: Precursor;
116	1	UniProt_SwissProt	A2APB8	48	86297	2	1	2	1	0.06	RecName: Full=Targeting protein for Xklp2;
88	1	UniProt_SwissProt	Q8K327	53	88703	3	1	3	1	0.05	RecName: Full=Chromosome alignment-maintaining phosphoprotein 1; AltName: Full=Zinc finger protein 828;
111	1	UniProt_SwissProt	Q01853	48	89950	1	1	1	1	0.05	RecName: Full=Transitional endoplasmic reticulum ATPase; Short=TER ATPase; EC=3.6.4.6; AltName: Full=15S Mg(2+)-ATPase p97 subunit; AltName: Full=Valosin-containing protein; Short=VCP;
31	1	UniProt_SwissProt	F6ZDS4	103	274223	8	3	8	3	0.05	RecName: Full=Nucleoprotein TPR; AltName: Full=NPC-associated intranuclear protein; AltName: Full=Translocated promoter region and nuclear basket protein;
159	1	UniProt_SwissProt	Q9D5V5	41	91486	3	1	3	1	0.05	RecName: Full=Cullin-5; Short=CUL-5;
124	1	UniProt_SwissProt	Q9Z103	47	92917	1	1	1	1	0.05	RecName: Full=Activity-dependent neuroprotector homeobox protein; AltName: Full=Activity-dependent neuroprotective protein;
127	1	UniProt_SwissProt	Q6PGF3	47	93437	3	1	3	1	0.05	RecName: Full=Mediator of RNA polymerase II transcription subunit 16; AltName: Full=Mediator complex subunit 16; AltName: Full=Thyroid hormone receptor-associated protein 5; AltName: Full=Thyroid hormone receptor-associated protein complex 95 kDa component; Short=Trap95; AltName: Full=Vitamin D3 receptor-interacting protein complex 92 kDa component; Short=DRIP92;
141	1	UniProt_SwissProt	P70168	44	98377	4	1	4	1	0.05	RecName: Full=Importin subunit beta-1; AltName: Full=Karyopherin subunit beta-1; AltName: Full=Nuclear factor p97; AltName: Full=Pore targeting complex 97 kDa subunit; Short=PTAC97; AltName: Full=SCG;
77	1	UniProt_SwissProt	Q9DBR1	58	109588	3	1	3	1	0.04	RecName: Full=5'-3' exoribonuclease 2; EC=3.1.13.-; AltName: Full=Protein Dhm1;
104	1	UniProt_SwissProt	Q8BIH0	49	111330	1	1	1	1	0.04	RecName: Full=Histone deacetylase complex subunit SAP130; AltName: Full=130 kDa Sin3-associated polypeptide; AltName: Full=Sin3-associated polypeptide p130;
59	1	UniProt_SwissProt	Q9ESZ8	64	112708	3	1	3	1	0.04	RecName: Full=General transcription factor II-I; Short=GTFII-I; Short=TFII-I; AltName: Full=Bruton tyrosine kinase-associated protein 135; Short=BAP-135; Short=BTK-associated protein 135;
78	1	UniProt_SwissProt	Q6NZN0	58	114472	2	1	2	1	0.04	RecName: Full=RNA-binding protein 26; AltName: Full=Protein expressed in male leptotene and zygotene spermatocytes 393; Short=MLZ-393; AltName: Full=RNA-binding motif protein 26;
58	1	UniProt_SwissProt	Q5SWW4	65	241917	5	2	5	2	0.04	RecName: Full=Mediator of RNA polymerase II transcription subunit 13; AltName: Full=Thyroid hormone receptor-associated protein 1; AltName: Full=Thyroid hormone receptor-associated protein complex 240 kDa component; Short=Trap240;
113	1	UniProt_SwissProt	A2BH40	48	242852	6	2	6	2	0.04	RecName: Full=AT-rich interactive domain-containing protein 1A; Short=ARID domain-containing protein 1A; AltName: Full=BRG1-associated factor 250; Short=BAF250; AltName: Full=BRG1-associated factor 250a; Short=BAF250A; AltName: Full=Osa homolog 1; AltName: Full=SWI-like protein; AltName: Full=SWI/SNF complex protein p270; AltName: Full=SWI/SNF-related, matrix-associated, actin-dependent regulator…
164	1	UniProt_SwissProt	Q6PIJ4	40	139134	2	1	2	1	0.03	RecName: Full=Nuclear factor related to kappa-B-binding protein; AltName: Full=DNA-binding protein R kappa-B;
149	1	UniProt_SwissProt	Q99NB9	43	146465	3	1	3	1	0.03	RecName: Full=Splicing factor 3B subunit 1; AltName: Full=Pre-mRNA-splicing factor SF3b 155 kDa subunit; Short=SF3b155; AltName: Full=Spliceosome-associated protein 155; Short=SAP 155;
57	1	UniProt_SwissProt	O70133	66	150692	2	1	2	1	0.03	RecName: Full=ATP-dependent RNA helicase A; Short=RHA; EC=3.6.4.13; AltName: Full=DEAH box protein 9; Short=mHEL-5; AltName: Full=Nuclear DNA helicase II; Short=NDH II;
142	1	UniProt_SwissProt	Q80YQ2	44	157925	4	1	4	1	0.03	RecName: Full=Mediator of RNA polymerase II transcription subunit 23; AltName: Full=Cofactor required for Sp1 transcriptional activation subunit 3; Short=CRSP complex subunit 3; AltName: Full=Mediator complex subunit 23; AltName: Full=Protein sur-2 homolog; Short=mSur-2;
126	1	UniProt_SwissProt	A2ABV5	47	162346	3	1	3	1	0.03	RecName: Full=Mediator of RNA polymerase II transcription subunit 14; AltName: Full=Cofactor required for Sp1 transcriptional activation subunit 2; Short=CRSP complex subunit 2; AltName: Full=Mediator complex subunit 14; AltName: Full=Thyroid hormone receptor-associated protein complex 170 kDa component; Short=Trap170;
128	1	UniProt_SwissProt	Q8CGC7	46	171739	1	1	1	1	0.03	RecName: Full=Bifunctional glutamate/proline--tRNA ligase; AltName: Full=Bifunctional aminoacyl-tRNA synthetase; Includes: RecName: Full=Glutamate--tRNA ligase; EC=6.1.1.17; AltName: Full=Glutamyl-tRNA synthetase; Short=GluRS; Includes: RecName: Full=Proline--tRNA ligase; EC=6.1.1.15; AltName: Full=Prolyl-tRNA synthetase; Short=ProRS;
102	1	UniProt_SwissProt	O35134	50	196039	2	1	2	1	0.02	RecName: Full=DNA-directed RNA polymerase I subunit RPA1; Short=RNA polymerase I subunit A1; EC=2.7.7.6; AltName: Full=DNA-directed RNA polymerase I largest subunit; AltName: Full=DNA-directed RNA polymerase I subunit A; AltName: Full=RNA polymerase I 194 kDa subunit; Short=RPA194;
85	1	UniProt_SwissProt	Q80WE4	53	204986	3	1	3	1	0.02	RecName: Full=Kinesin-like protein KIF20B; AltName: Full=Kinesin family member 20B; AltName: Full=Kinesin-related motor interacting with PIN1; AltName: Full=M-phase phosphoprotein 1; Short=MPP1;
138	1	UniProt_SwissProt	Q61191	45	212188	5	1	4	1	0.02	RecName: Full=Host cell factor 1; Short=HCF; Short=HCF-1; AltName: Full=C1 factor; Contains: RecName: Full=HCF N-terminal chain 1; Contains: RecName: Full=HCF N-terminal chain 2; Contains: RecName: Full=HCF N-terminal chain 3; Contains: RecName: Full=HCF N-terminal chain 4; Contains: RecName: Full=HCF N-terminal chain 5; Contains: RecName: Full=HCF N-terminal chain 6; Contains: RecName: Full=HCF …
39	1	UniProt_SwissProt	Q6PDQ2	79	219096	8	1	8	1	0.02	RecName: Full=Chromodomain-helicase-DNA-binding protein 4; Short=CHD-4; EC=3.6.4.12;
132	1	UniProt_SwissProt	A2AWL7	45	330480	2	1	2	1	0.01	RecName: Full=MAX gene-associated protein;

## Sheet: FS2-FBXL19_2
User	bmk
Search title	QE0325_EDimitrova_rerun_10.mgf
MS data file	D:\MGFs\11_2014\QE0325_EDimitrova_rerun_10.mgf
Database	UniProt_SwissProt 20131208
Taxonomy	Mus musculus (house mouse) (16,642 sequences)
Timestamp	25 Nov 2014 at 09:53:15 GMT
Type of search	MS/MS Ion Search
Enzyme	Trypsin
Fixed modifications	Carbamidomethyl (C)
Variable modifications	Deamidated (N),Deamidated (Q),Oxidation (M)
Mass values	Monoisotopic
Protein mass	Unrestricted
Peptide mass tolerance	10 ppm
Fragment mass tolerance	0.05 Da
Max missed cleavages	1
Instrument type	Q-Exactive
Number of queries	21123
Significance threshold p<	0.003651
Max. number of families	AUTO
Ions score or expect cut-off	20
Preferred taxonomy	All entries
Show Percolator scores?	no
Family	Member	Database	Accession	Score	Mass	Num. of matches	Num. of significant matches	Num. of sequences	Num. of significant sequences	emPAI	Description
40	1	UniProt_SwissProt	P62806	628	11360	23	22	12	11	201.52	RecName: Full=Histone H4;
3	1	UniProt_SwissProt	P60710	2903	42052	132	117	31	29	87.13	RecName: Full=Actin, cytoplasmic 1; AltName: Full=Beta-actin; Contains: RecName: Full=Actin, cytoplasmic 1, N-terminally processed;
199	1	UniProt_SwissProt	P62858	235	7893	8	8	6	6	57.22	RecName: Full=40S ribosomal protein S28;
153	1	UniProt_SwissProt	Q9CZX8	278	16076	16	15	13	13	56.57	RecName: Full=40S ribosomal protein S19;
160	1	UniProt_SwissProt	Q9CQR2	266	9250	9	8	6	5	53.26	RecName: Full=40S ribosomal protein S21;
98	1	UniProt_SwissProt	P14131	382	16549	23	20	16	14	50.73	RecName: Full=40S ribosomal protein S16;
9	1	UniProt_SwissProt	Q99K48	1823	54620	90	71	38	30	43.75	RecName: Full=Non-POU domain-containing octamer-binding protein; Short=NonO protein;
31	1	UniProt_SwissProt	Q61937	777	32711	42	35	20	18	35.21	RecName: Full=Nucleophosmin; Short=NPM; AltName: Full=Nucleolar phosphoprotein B23; AltName: Full=Nucleolar protein NO38; AltName: Full=Numatrin;
3	2	UniProt_SwissProt	P68033	1612	42334	89	76	24	23	30.59	RecName: Full=Actin, alpha cardiac muscle 1; AltName: Full=Alpha-cardiac actin; Flags: Precursor;
7	1	UniProt_SwissProt	P09405	2045	76734	95	81	55	52	28.61	RecName: Full=Nucleolin; AltName: Full=Protein C23;
125	1	UniProt_SwissProt	P62270	321	17708	17	13	15	11	22.42	RecName: Full=40S ribosomal protein S18; AltName: Full=Ke-3; Short=Ke3;
9	2	UniProt_SwissProt	Q8VIJ6	1583	75508	82	69	37	35	20.48	RecName: Full=Splicing factor, proline- and glutamine-rich; AltName: Full=DNA-binding p52/p100 complex, 100 kDa subunit; AltName: Full=Polypyrimidine tract-binding protein-associated-splicing factor; Short=PSF; Short=PTB-associated-splicing factor;
26	1	UniProt_SwissProt	P47962	871	34607	42	37	19	16	18.85	RecName: Full=60S ribosomal protein L5;
185	1	UniProt_SwissProt	P61255	247	17248	13	12	11	10	18.74	RecName: Full=60S ribosomal protein L26; AltName: Full=Silica-induced gene 20 protein; Short=SIG-20;
94	1	UniProt_SwissProt	P62908	389	26828	28	20	20	14	18.49	RecName: Full=40S ribosomal protein S3;
17	1	UniProt_SwissProt	P53395	1163	53555	60	54	32	28	17.35	RecName: Full=Lipoamide acyltransferase component of branched-chain alpha-keto acid dehydrogenase complex, mitochondrial; EC=2.3.1.168; AltName: Full=Branched-chain alpha-keto acid dehydrogenase complex component E2; Short=BCKAD-E2; Short=BCKADE2; AltName: Full=Dihydrolipoamide acetyltransferase component of branched-chain alpha-keto acid dehydrogenase complex; AltName: Full=Dihydrolipoamide bran…
48	1	UniProt_SwissProt	P97351	560	30094	27	23	19	16	15.63	RecName: Full=40S ribosomal protein S3a; AltName: Full=Protein TU-11;
4	1	UniProt_SwissProt	Q6PB97	2589	75508	137	113	42	38	14.71	RecName: Full=F-box/LRR-repeat protein 19; AltName: Full=F-box and leucine-rich repeat protein 19;
371	1	UniProt_SwissProt	P62862	133	6644	6	6	4	4	14.35	RecName: Full=40S ribosomal protein S30;
144	1	UniProt_SwissProt	Q6ZWY9	292	13898	13	12	7	7	13.57	RecName: Full=Histone H2B type 1-C/E/G;
10	1	UniProt_SwissProt	Q99MR8	1758	79692	60	55	39	36	13.41	RecName: Full=Methylcrotonoyl-CoA carboxylase subunit alpha, mitochondrial; Short=MCCase subunit alpha; EC=6.4.1.4; AltName: Full=3-methylcrotonyl-CoA carboxylase 1; AltName: Full=3-methylcrotonyl-CoA carboxylase biotin-containing subunit; AltName: Full=3-methylcrotonyl-CoA:carbon dioxide ligase subunit alpha; Flags: Precursor;
182	1	UniProt_SwissProt	P41105	250	15781	12	9	11	9	13.29	RecName: Full=60S ribosomal protein L28;
239	1	UniProt_SwissProt	P62751	201	17684	13	11	11	9	13.07	RecName: Full=60S ribosomal protein L23a;
332	1	UniProt_SwissProt	P47915	150	17633	10	10	9	9	13.07	RecName: Full=60S ribosomal protein L29;
64	1	UniProt_SwissProt	P47911	486	33546	26	21	20	16	11.49	RecName: Full=60S ribosomal protein L6; AltName: Full=TAX-responsive enhancer element-binding protein 107; Short=TAXREB107;
115	1	UniProt_SwissProt	P62702	350	29807	17	16	16	15	11.39	RecName: Full=40S ribosomal protein S4, X isoform;
168	1	UniProt_SwissProt	P63323	262	14858	10	9	8	7	11.21	RecName: Full=40S ribosomal protein S12;
158	1	UniProt_SwissProt	P62889	267	12947	9	7	6	5	11.19	RecName: Full=60S ribosomal protein L30;
266	1	UniProt_SwissProt	P62830	185	14970	10	8	9	8	10.99	RecName: Full=60S ribosomal protein L23;
313	1	UniProt_SwissProt	Q9D1R9	158	13513	7	7	7	7	10.03	RecName: Full=60S ribosomal protein L34;
236	1	UniProt_SwissProt	P62317	202	13632	10	7	8	6	9.82	RecName: Full=Small nuclear ribonucleoprotein Sm D2; Short=Sm-D2; AltName: Full=snRNP core protein D2;
173	1	UniProt_SwissProt	Q9CPR4	260	21637	15	13	11	10	9.79	RecName: Full=60S ribosomal protein L17;
225	1	UniProt_SwissProt	Q8BP67	210	17882	12	9	10	7	9.49	RecName: Full=60S ribosomal protein L24;
12	1	UniProt_SwissProt	Q9JIK5	1592	94120	68	64	44	42	9.08	RecName: Full=Nucleolar RNA helicase 2; EC=3.6.4.13; AltName: Full=DEAD box protein 21; AltName: Full=Gu-alpha; AltName: Full=Nucleolar RNA helicase Gu; AltName: Full=Nucleolar RNA helicase II; AltName: Full=RH II/Gu;
87	1	UniProt_SwissProt	Q99LP6	407	24520	18	17	11	11	8.91	RecName: Full=GrpE protein homolog 1, mitochondrial; AltName: Full=Mt-GrpE#1; Flags: Precursor;
226	1	UniProt_SwissProt	Q6ZWN5	209	22635	17	12	15	10	8.73	RecName: Full=40S ribosomal protein S9;
141	1	UniProt_SwissProt	P14148	297	31457	22	15	16	13	8.43	RecName: Full=60S ribosomal protein L7;
165	1	UniProt_SwissProt	O89086	264	16595	12	10	6	5	8.39	RecName: Full=Putative RNA-binding protein 3; AltName: Full=RNA-binding motif protein 3;
14	1	UniProt_SwissProt	Q91ZA3	1363	80498	57	50	34	31	8.31	RecName: Full=Propionyl-CoA carboxylase alpha chain, mitochondrial; Short=PCCase subunit alpha; EC=6.4.1.3; AltName: Full=Propanoyl-CoA:carbon dioxide ligase subunit alpha; Flags: Precursor;
54	1	UniProt_SwissProt	Q9WTX5	527	18831	18	13	11	9	8.28	RecName: Full=S-phase kinase-associated protein 1; AltName: Full=Cyclin-A/CDK2-associated protein p19; AltName: Full=S-phase kinase-associated protein 1A; AltName: Full=p19A; AltName: Full=p19skp1;
149	1	UniProt_SwissProt	P63325	282	18904	16	13	11	8	8.28	RecName: Full=40S ribosomal protein S10;
43	1	UniProt_SwissProt	P61290	617	29602	19	17	12	11	8.2	RecName: Full=Proteasome activator complex subunit 3; AltName: Full=11S regulator complex subunit gamma; Short=REG-gamma; AltName: Full=Activator of multicatalytic protease subunit 3; AltName: Full=Ki nuclear autoantigen; AltName: Full=Proteasome activator 28 subunit gamma; Short=PA28g; Short=PA28gamma;
5	1	UniProt_SwissProt	P57780	2320	105368	80	68	47	40	7.63	RecName: Full=Alpha-actinin-4; AltName: Full=F-actin cross-linking protein; AltName: Full=Non-muscle alpha-actinin 4;
66	1	UniProt_SwissProt	P58771	473	32718	21	18	18	15	7.62	RecName: Full=Tropomyosin alpha-1 chain; AltName: Full=Alpha-tropomyosin; AltName: Full=Tropomyosin-1;
329	1	UniProt_SwissProt	P62309	151	8547	7	4	4	2	7.56	RecName: Full=Small nuclear ribonucleoprotein G; Short=snRNP-G; AltName: Full=Sm protein G; Short=Sm-G; Short=SmG;
34	1	UniProt_SwissProt	O88569	709	37437	22	21	16	15	7.49	RecName: Full=Heterogeneous nuclear ribonucleoproteins A2/B1; Short=hnRNP A2/B1;
216	1	UniProt_SwissProt	Q9CZM2	219	24245	14	13	11	11	7.42	RecName: Full=60S ribosomal protein L15;
324	1	UniProt_SwissProt	P62305	154	10854	7	6	3	3	7.36	RecName: Full=Small nuclear ribonucleoprotein E; Short=snRNP-E; AltName: Full=Sm protein E; Short=Sm-E; Short=SmE;
183	1	UniProt_SwissProt	P43277	248	22086	10	10	10	10	7.33	RecName: Full=Histone H1.3; AltName: Full=H1 VAR.4; AltName: Full=H1d;
350	1	UniProt_SwissProt	P62849	141	15413	10	8	6	5	7.27	RecName: Full=40S ribosomal protein S24;
114	1	UniProt_SwissProt	P62315	354	13273	8	8	4	4	7.09	RecName: Full=Small nuclear ribonucleoprotein Sm D1; Short=Sm-D1; AltName: Full=Sm-D autoantigen; AltName: Full=snRNP core protein D1;
6	1	UniProt_SwissProt	Q01320	2089	173480	98	89	69	63	6.96	RecName: Full=DNA topoisomerase 2-alpha; EC=5.99.1.3; AltName: Full=DNA topoisomerase II, alpha isozyme;
223	1	UniProt_SwissProt	P61358	211	15788	11	8	9	6	6.91	RecName: Full=60S ribosomal protein L27;
95	1	UniProt_SwissProt	Q6PDM2	384	27842	21	19	14	12	6.55	RecName: Full=Serine/arginine-rich splicing factor 1; AltName: Full=ASF/SF2; AltName: Full=Pre-mRNA-splicing factor SRp30a; AltName: Full=Splicing factor, arginine/serine-rich 1;
1	1	UniProt_SwissProt	P16546	3820	285221	174	148	132	114	6.46	RecName: Full=Spectrin alpha chain, non-erythrocytic 1; AltName: Full=Alpha-II spectrin; AltName: Full=Fodrin alpha chain;
291	1	UniProt_SwissProt	O09167	172	18607	11	9	9	7	6.42	RecName: Full=60S ribosomal protein L21;
19	1	UniProt_SwissProt	P63017	1129	71055	50	40	34	28	6.35	RecName: Full=Heat shock cognate 71 kDa protein; AltName: Full=Heat shock 70 kDa protein 8;
175	1	UniProt_SwissProt	P62264	260	16434	10	8	8	7	6.29	RecName: Full=40S ribosomal protein S14;
203	1	UniProt_SwissProt	P99027	230	11644	7	7	5	5	6.28	RecName: Full=60S acidic ribosomal protein P2;
74	1	UniProt_SwissProt	Q9EQU5	436	33358	24	19	17	14	6.17	RecName: Full=Protein SET; AltName: Full=Phosphatase 2A inhibitor I2PP2A; Short=I-2PP2A; AltName: Full=Template-activating factor I; Short=TAF-I;
37	1	UniProt_SwissProt	P10126	652	50424	34	30	17	17	6.14	RecName: Full=Elongation factor 1-alpha 1; Short=EF-1-alpha-1; AltName: Full=Elongation factor Tu; Short=EF-Tu; AltName: Full=Eukaryotic elongation factor 1 A-1; Short=eEF1A-1;
25	1	UniProt_SwissProt	Q99MN9	872	58999	32	27	23	19	5.81	RecName: Full=Propionyl-CoA carboxylase beta chain, mitochondrial; Short=PCCase subunit beta; EC=6.4.1.3; AltName: Full=Propanoyl-CoA:carbon dioxide ligase subunit beta; Flags: Precursor;
138	1	UniProt_SwissProt	P84104	302	19546	12	12	7	7	5.78	RecName: Full=Serine/arginine-rich splicing factor 3; AltName: Full=Pre-mRNA-splicing factor SRP20; AltName: Full=Protein X16; AltName: Full=Splicing factor, arginine/serine-rich 3;
51	1	UniProt_SwissProt	Q9Z204	545	34421	16	15	13	13	5.78	RecName: Full=Heterogeneous nuclear ribonucleoproteins C1/C2; Short=hnRNP C1/C2;
213	1	UniProt_SwissProt	P62082	221	22113	15	12	12	9	5.74	RecName: Full=40S ribosomal protein S7;
3	3	UniProt_SwissProt	Q8BFZ3	1004	42319	58	45	13	12	5.64	RecName: Full=Beta-actin-like protein 2; AltName: Full=Kappa-actin;
230	1	UniProt_SwissProt	P67984	206	14807	8	8	6	6	5.62	RecName: Full=60S ribosomal protein L22; AltName: Full=Heparin-binding protein HBp15;
8	1	UniProt_SwissProt	Q7TPV4	1837	152854	80	70	60	54	5.61	RecName: Full=Myb-binding protein 1A; AltName: Full=Myb-binding protein of 160 kDa;
352	1	UniProt_SwissProt	O55128	139	17641	9	7	7	6	5.37	RecName: Full=Histone deacetylase complex subunit SAP18; AltName: Full=18 kDa Sin3-associated polypeptide; AltName: Full=Sin3-associated polypeptide p18;
416	1	UniProt_SwissProt	O55142	118	12660	11	6	9	5	5.25	RecName: Full=60S ribosomal protein L35a;
29	1	UniProt_SwissProt	Q61656	799	69760	43	34	30	23	5.23	RecName: Full=Probable ATP-dependent RNA helicase DDX5; EC=3.6.4.13; AltName: Full=DEAD box RNA helicase DEAD1; Short=mDEAD1; AltName: Full=DEAD box protein 5; AltName: Full=RNA helicase p68;
78	1	UniProt_SwissProt	P27659	430	46366	22	19	19	16	5.22	RecName: Full=60S ribosomal protein L3; AltName: Full=J1 protein;
2	1	UniProt_SwissProt	Q62261	3592	274908	141	122	102	88	5.11	RecName: Full=Spectrin beta chain, non-erythrocytic 1; AltName: Full=Beta-II spectrin; AltName: Full=Embryonic liver fodrin; AltName: Full=Fodrin beta chain;
492	1	UniProt_SwissProt	P68433	94	15509	10	8	8	6	5.04	RecName: Full=Histone H3.1;
267	1	UniProt_SwissProt	P63276	185	15571	9	8	6	5	5.04	RecName: Full=40S ribosomal protein S17;
345	1	UniProt_SwissProt	P19253	142	23563	12	9	10	7	5	RecName: Full=60S ribosomal protein L13a; AltName: Full=Transplantation antigen P198; AltName: Full=Tum-P198 antigen;
69	1	UniProt_SwissProt	Q9D8E6	461	47409	29	21	22	17	4.99	RecName: Full=60S ribosomal protein L4;
136	1	UniProt_SwissProt	P62754	304	28834	13	12	11	10	4.99	RecName: Full=40S ribosomal protein S6; AltName: Full=Phosphoprotein NP33;
183	2	UniProt_SwissProt	P15864	215	21254	8	8	8	8	4.85	RecName: Full=Histone H1.2; AltName: Full=H1 VAR.1; AltName: Full=H1c;
259	1	UniProt_SwissProt	P62281	188	18590	11	8	9	6	4.83	RecName: Full=40S ribosomal protein S11;
38	1	UniProt_SwissProt	P20152	641	53712	33	24	27	19	4.79	RecName: Full=Vimentin;
22	1	UniProt_SwissProt	Q3ULD5	1053	61910	37	31	24	20	4.77	RecName: Full=Methylcrotonoyl-CoA carboxylase beta chain, mitochondrial; Short=MCCase subunit beta; EC=6.4.1.4; AltName: Full=3-methylcrotonyl-CoA carboxylase 2; AltName: Full=3-methylcrotonyl-CoA carboxylase non-biotin-containing subunit; AltName: Full=3-methylcrotonyl-CoA:carbon dioxide ligase subunit beta; Flags: Precursor;
49	1	UniProt_SwissProt	Q9WTM5	556	51252	21	20	18	17	4.74	RecName: Full=RuvB-like 2; EC=3.6.4.12; AltName: Full=p47 protein;
100	1	UniProt_SwissProt	P35980	381	21688	14	12	10	8	4.64	RecName: Full=60S ribosomal protein L18;
150	1	UniProt_SwissProt	P62242	281	24475	13	13	9	9	4.63	RecName: Full=40S ribosomal protein S8;
305	1	UniProt_SwissProt	P62852	166	13791	6	6	5	5	4.41	RecName: Full=40S ribosomal protein S25;
209	1	UniProt_SwissProt	P53026	226	25072	16	11	12	8	4.38	RecName: Full=60S ribosomal protein L10a; AltName: Full=CSA-19; AltName: Full=Neural precursor cell expressed developmentally down-regulated protein 6; Short=NEDD-6;
269	1	UniProt_SwissProt	Q9JJI8	183	8256	7	5	4	3	4.33	RecName: Full=60S ribosomal protein L38;
277	1	UniProt_SwissProt	P14115	179	16709	8	8	6	6	4.31	RecName: Full=60S ribosomal protein L27a; AltName: Full=L29;
255	2	UniProt_SwissProt	Q64523	179	13980	9	6	7	5	4.27	RecName: Full=Histone H2A type 2-C; AltName: Full=H2a-613B;
28	1	UniProt_SwissProt	Q78PY7	856	102709	44	37	39	35	4.25	RecName: Full=Staphylococcal nuclease domain-containing protein 1; AltName: Full=100 kDa coactivator; AltName: Full=p100 co-activator;
255	1	UniProt_SwissProt	P22752	193	14127	9	6	7	5	4.2	RecName: Full=Histone H2A type 1;
207	1	UniProt_SwissProt	P62301	228	17212	11	7	9	6	4.09	RecName: Full=40S ribosomal protein S13;
506	1	UniProt_SwissProt	P62900	92	14454	6	5	6	5	4.01	RecName: Full=60S ribosomal protein L31;
364	1	UniProt_SwissProt	Q9D0T1	136	14393	5	5	5	5	4.01	RecName: Full=NHP2-like protein 1; AltName: Full=Fertilization antigen 1; Short=FA-1; AltName: Full=High mobility group-like nuclear protein 2 homolog 1; AltName: Full=Sperm-specific antigen 1; AltName: Full=U4/U6.U5 tri-snRNP 15.5 kDa protein; Contains: RecName: Full=NHP2-like protein 1, N-terminally processed;
281	1	UniProt_SwissProt	Q9CQF3	176	26281	9	9	8	8	3.98	RecName: Full=Cleavage and polyadenylation specificity factor subunit 5; AltName: Full=Nucleoside diphosphate-linked moiety X motif 21; Short=Nudix motif 21;
57	1	UniProt_SwissProt	Q91VC3	509	47095	22	16	20	15	3.97	RecName: Full=Eukaryotic initiation factor 4A-III; Short=eIF-4A-III; Short=eIF4A-III; EC=3.6.4.13; AltName: Full=ATP-dependent RNA helicase DDX48; AltName: Full=ATP-dependent RNA helicase eIF4A-3; AltName: Full=DEAD box protein 48; AltName: Full=Eukaryotic translation initiation factor 4A isoform 3; Contains: RecName: Full=Eukaryotic initiation factor 4A-III, N-terminally processed;
214	1	UniProt_SwissProt	Q62241	221	17522	6	6	4	4	3.94	RecName: Full=U1 small nuclear ribonucleoprotein C; Short=U1 snRNP C; Short=U1-C; Short=U1C;
188	1	UniProt_SwissProt	Q9CR57	242	23663	13	9	10	6	3.88	RecName: Full=60S ribosomal protein L14;
52	1	UniProt_SwissProt	Q9CY58	538	44801	27	19	18	14	3.84	RecName: Full=Plasminogen activator inhibitor 1 RNA-binding protein; AltName: Full=PAI1 RNA-binding protein 1; Short=PAI-RBP1; AltName: Full=SERPINE1 mRNA-binding protein 1;
82	1	UniProt_SwissProt	P27048	419	23811	13	12	7	6	3.81	RecName: Full=Small nuclear ribonucleoprotein-associated protein B; Short=snRNP-B; Short=snRPB; AltName: Full=Sm protein B; Short=Sm-B; Short=SmB;
77	1	UniProt_SwissProt	P14206	436	32931	16	12	13	11	3.8	RecName: Full=40S ribosomal protein SA; AltName: Full=37 kDa laminin receptor precursor; Short=37LRP; AltName: Full=37 kDa oncofetal antigen; AltName: Full=37/67 kDa laminin receptor; Short=LRP/LR; AltName: Full=67 kDa laminin receptor; Short=67LR; AltName: Full=Laminin receptor 1; Short=LamR; AltName: Full=Laminin-binding protein precursor p40; Short=LBP/p40; AltName: Full=OFA/iLRP;
106	1	UniProt_SwissProt	P12970	367	30129	17	13	14	10	3.77	RecName: Full=60S ribosomal protein L7a; AltName: Full=Surfeit locus protein 3;
382	1	UniProt_SwissProt	P62245	129	14944	7	5	6	5	3.72	RecName: Full=40S ribosomal protein S15a;
27	1	UniProt_SwissProt	Q8VEK3	869	88661	38	32	25	22	3.69	RecName: Full=Heterogeneous nuclear ribonucleoprotein U; Short=hnRNP U; AltName: Full=Scaffold attachment factor A; Short=SAF-A;
156	1	UniProt_SwissProt	P47963	275	24348	13	9	11	7	3.68	RecName: Full=60S ribosomal protein L13; AltName: Full=A52;
24	1	UniProt_SwissProt	P38647	950	73701	34	28	26	22	3.66	RecName: Full=Stress-70 protein, mitochondrial; AltName: Full=75 kDa glucose-regulated protein; Short=GRP-75; AltName: Full=Heat shock 70 kDa protein 9; AltName: Full=Mortalin; AltName: Full=Peptide-binding protein 74; Short=PBP74; AltName: Full=p66 MOT; Flags: Precursor;
308	1	UniProt_SwissProt	P62983	164	18282	8	6	7	6	3.62	RecName: Full=Ubiquitin-40S ribosomal protein S27a; AltName: Full=Ubiquitin carboxyl extension protein 80; Contains: RecName: Full=Ubiquitin; Contains: RecName: Full=40S ribosomal protein S27a; Flags: Precursor;
83	1	UniProt_SwissProt	Q08288	417	44165	16	15	14	13	3.45	RecName: Full=Cell growth-regulating nucleolar protein; AltName: Full=Protein expressed in male leptotene and zygotene spermatocytes 264; Short=MLZ-264;
170	1	UniProt_SwissProt	P51410	262	21982	9	8	7	7	3.44	RecName: Full=60S ribosomal protein L9;
534	1	UniProt_SwissProt	Q62425	85	9321	3	3	3	3	3.39	RecName: Full=NADH dehydrogenase [ubiquinone] 1 alpha subcomplex subunit 4; AltName: Full=Complex I-MLRQ; Short=CI-MLRQ; AltName: Full=NADH-ubiquinone oxidoreductase MLRQ subunit;
29	2	UniProt_SwissProt	Q62167	709	73455	30	27	25	22	3.39	RecName: Full=ATP-dependent RNA helicase DDX3X; EC=3.6.4.13; AltName: Full=D1Pas1-related sequence 2; AltName: Full=DEAD box RNA helicase DEAD3; Short=mDEAD3; AltName: Full=DEAD box protein 3, X-chromosomal; AltName: Full=Embryonic RNA helicase;
392	1	UniProt_SwissProt	P62911	125	15964	7	7	5	5	3.29	RecName: Full=60S ribosomal protein L32;
411	1	UniProt_SwissProt	P62267	120	15969	5	5	5	5	3.29	RecName: Full=40S ribosomal protein S23;
44	1	UniProt_SwissProt	Q9D6Z1	604	64880	22	21	20	19	3.28	RecName: Full=Nucleolar protein 56; AltName: Full=Nucleolar protein 5A;
521	1	UniProt_SwissProt	P83882	90	12718	5	4	5	4	3.28	RecName: Full=60S ribosomal protein L36a; AltName: Full=60S ribosomal protein L44;
58	1	UniProt_SwissProt	Q91VM5	509	42136	23	18	17	13	3.27	RecName: Full=RNA binding motif protein, X-linked-like-1; AltName: Full=Heterogeneous nuclear ribonucleoprotein G-like 1; AltName: Full=RNA binding motif protein, X chromosome retrogene;
128	1	UniProt_SwissProt	Q62376	313	52018	23	17	20	15	3.26	RecName: Full=U1 small nuclear ribonucleoprotein 70 kDa; Short=U1 snRNP 70 kDa; Short=U1-70K; Short=snRNP70;
81	1	UniProt_SwissProt	P60122	421	50524	16	15	16	15	3.06	RecName: Full=RuvB-like 1; EC=3.6.4.12; AltName: Full=49 kDa TATA box-binding protein-interacting protein; Short=49 kDa TBP-interacting protein; AltName: Full=DNA helicase p50; AltName: Full=Pontin 52; AltName: Full=TIP49a;
314	1	UniProt_SwissProt	P60867	158	13478	8	6	5	4	2.99	RecName: Full=40S ribosomal protein S20;
167	1	UniProt_SwissProt	Q99020	263	30926	11	10	8	8	2.92	RecName: Full=Heterogeneous nuclear ribonucleoprotein A/B; Short=hnRNP A/B; AltName: Full=CArG-binding factor-A; Short=CBF-A;
229	1	UniProt_SwissProt	P25444	208	31497	10	9	10	9	2.83	RecName: Full=40S ribosomal protein S2; AltName: Full=40S ribosomal protein S4; AltName: Full=Protein LLRep3;
13	2	UniProt_SwissProt	Q9Z0U1	1010	131428	50	41	40	33	2.79	RecName: Full=Tight junction protein ZO-2; AltName: Full=Tight junction protein 2; AltName: Full=Zona occludens protein 2; AltName: Full=Zonula occludens protein 2;
265	1	UniProt_SwissProt	Q9CRB2	185	17578	5	5	5	5	2.78	RecName: Full=H/ACA ribonucleoprotein complex subunit 2; AltName: Full=Nucleolar protein family A member 2; AltName: Full=snoRNP protein NHP2;
358	1	UniProt_SwissProt	P62320	137	14021	10	7	3	3	2.78	RecName: Full=Small nuclear ribonucleoprotein Sm D3; Short=Sm-D3; AltName: Full=snRNP core protein D3;
228	1	UniProt_SwissProt	Q6ZWV3	208	25044	11	9	9	7	2.7	RecName: Full=60S ribosomal protein L10; AltName: Full=Protein QM homolog;
21	1	UniProt_SwissProt	Q8R4U7	1105	119809	45	39	37	31	2.68	RecName: Full=Leucine zipper protein 1; AltName: Full=Leucine zipper motif-containing protein;
19	2	UniProt_SwissProt	P20029	656	72492	25	22	21	20	2.68	RecName: Full=78 kDa glucose-regulated protein; Short=GRP-78; AltName: Full=Heat shock 70 kDa protein 5; AltName: Full=Immunoglobulin heavy chain-binding protein; Short=BiP; Flags: Precursor;
55	1	UniProt_SwissProt	P52293	511	58234	17	17	15	15	2.65	RecName: Full=Importin subunit alpha-1; AltName: Full=Importin alpha P1; AltName: Full=Karyopherin subunit alpha-2; AltName: Full=Pendulin; AltName: Full=Pore targeting complex 58 kDa subunit; Short=PTAC58; AltName: Full=RAG cohort protein 1; AltName: Full=SRP1-alpha;
45	1	UniProt_SwissProt	O35286	604	91748	36	29	28	21	2.62	RecName: Full=Putative pre-mRNA-splicing factor ATP-dependent RNA helicase DHX15; EC=3.6.4.13; AltName: Full=DEAH box protein 15;
13	1	UniProt_SwissProt	P39447	1454	195022	72	60	57	48	2.62	RecName: Full=Tight junction protein ZO-1; AltName: Full=Tight junction protein 1; AltName: Full=Zona occludens protein 1; AltName: Full=Zonula occludens protein 1;
362	1	UniProt_SwissProt	Q6ZWV7	136	14544	7	5	6	4	2.59	RecName: Full=60S ribosomal protein L35;
66	2	UniProt_SwissProt	P21107	267	33031	15	11	12	9	2.59	RecName: Full=Tropomyosin alpha-3 chain; AltName: Full=Gamma-tropomyosin; AltName: Full=Tropomyosin-3;
105	1	UniProt_SwissProt	Q9ER69	368	44321	15	12	12	11	2.58	RecName: Full=Pre-mRNA-splicing regulator WTAP; AltName: Full=Female-lethal(2)D homolog; AltName: Full=WT1-associated protein; AltName: Full=Wilms tumor 1-associating protein;
286	1	UniProt_SwissProt	P59708	173	14690	4	4	4	4	2.56	RecName: Full=Pre-mRNA branch site protein p14; AltName: Full=SF3b 14 kDa subunit;
41	1	UniProt_SwissProt	P29341	627	70854	28	22	21	15	2.55	RecName: Full=Polyadenylate-binding protein 1; Short=PABP-1; Short=Poly(A)-binding protein 1;
32	1	UniProt_SwissProt	Q920B9	745	120320	39	34	31	26	2.52	RecName: Full=FACT complex subunit SPT16; AltName: Full=Chromatin-specific transcription elongation factor 140 kDa subunit; AltName: Full=FACT 140 kDa subunit; AltName: Full=FACTp140; AltName: Full=Facilitates chromatin transcription complex subunit SPT16;
34	2	UniProt_SwissProt	P49312	550	34289	19	15	11	8	2.44	RecName: Full=Heterogeneous nuclear ribonucleoprotein A1; Short=hnRNP A1; AltName: Full=HDP-1; AltName: Full=Helix-destabilizing protein; AltName: Full=Single-strand-binding protein; AltName: Full=Topoisomerase-inhibitor suppressed; AltName: Full=hnRNP core protein A1; Contains: RecName: Full=Heterogeneous nuclear ribonucleoprotein A1, N-terminally processed;
255	3	UniProt_SwissProt	P27661	140	15133	7	5	5	4	2.43	RecName: Full=Histone H2AX; Short=H2a/x; AltName: Full=Histone H2A.X;
29	3	UniProt_SwissProt	Q501J6	670	72981	31	22	24	17	2.42	RecName: Full=Probable ATP-dependent RNA helicase DDX17; EC=3.6.4.13; AltName: Full=DEAD box protein 17;
622	1	UniProt_SwissProt	Q9D823	70	11299	5	3	5	3	2.41	RecName: Full=60S ribosomal protein L37;
109	1	UniProt_SwissProt	P99024	364	50095	17	15	11	10	2.4	RecName: Full=Tubulin beta-5 chain;
142	1	UniProt_SwissProt	P47757	295	31611	13	8	9	6	2.28	RecName: Full=F-actin-capping protein subunit beta; AltName: Full=CapZ beta;
73	1	UniProt_SwissProt	Q03265	442	59830	17	15	17	15	2.27	RecName: Full=ATP synthase subunit alpha, mitochondrial; Flags: Precursor;
34	3	UniProt_SwissProt	Q8BG05	429	39856	17	14	12	9	2.26	RecName: Full=Heterogeneous nuclear ribonucleoprotein A3; Short=hnRNP A3;
107	1	UniProt_SwissProt	P32067	366	47898	16	12	16	12	2.25	RecName: Full=Lupus La protein homolog; AltName: Full=La autoantigen homolog; AltName: Full=La ribonucleoprotein;
499	1	UniProt_SwissProt	Q9CQS2	93	7758	2	2	2	2	2.25	RecName: Full=H/ACA ribonucleoprotein complex subunit 3; AltName: Full=Nucleolar protein 10; AltName: Full=Nucleolar protein family A member 3; AltName: Full=snoRNP protein NOP10;
59	1	UniProt_SwissProt	Q8R081	508	64550	24	20	14	11	2.22	RecName: Full=Heterogeneous nuclear ribonucleoprotein L; Short=hnRNP L;
304	1	UniProt_SwissProt	P62918	167	28235	13	9	11	7	2.21	RecName: Full=60S ribosomal protein L8;
260	1	UniProt_SwissProt	P57784	187	28454	8	7	8	7	2.18	RecName: Full=U2 small nuclear ribonucleoprotein A'; Short=U2 snRNP A';
328	1	UniProt_SwissProt	P62827	151	24579	8	7	7	6	2.15	RecName: Full=GTP-binding nuclear protein Ran; AltName: Full=GTPase Ran; AltName: Full=Ras-like protein TC4; AltName: Full=Ras-related nuclear protein;
68	1	UniProt_SwissProt	Q8VE37	461	45359	14	13	10	9	2.13	RecName: Full=Regulator of chromosome condensation; AltName: Full=Chromosome condensation protein 1;
63	1	UniProt_SwissProt	Q3UKJ7	490	58134	18	16	12	11	2.11	RecName: Full=WD40 repeat-containing protein SMU1; AltName: Full=Smu-1 suppressor of mec-8 and unc-52 protein homolog; Contains: RecName: Full=WD40 repeat-containing protein SMU1, N-terminally processed;
9	3	UniProt_SwissProt	Q8R326	318	58835	17	15	15	14	2.07	RecName: Full=Paraspeckle component 1; AltName: Full=Paraspeckle protein 1; Short=mPSP1;
80	1	UniProt_SwissProt	P68369	407	50788	18	16	13	12	2.04	RecName: Full=Tubulin alpha-1A chain; AltName: Full=Alpha-tubulin 1; AltName: Full=Alpha-tubulin isotype M-alpha-1; AltName: Full=Tubulin alpha-1 chain;
79	1	UniProt_SwissProt	Q62093	423	25461	10	8	6	4	2.03	RecName: Full=Serine/arginine-rich splicing factor 2; AltName: Full=Protein PR264; AltName: Full=Putative myelin regulatory factor 1; Short=MRF-1; AltName: Full=Splicing component, 35 kDa; AltName: Full=Splicing factor SC35; Short=SC-35; AltName: Full=Splicing factor, arginine/serine-rich 2;
145	1	UniProt_SwissProt	P62137	291	38257	10	10	9	9	2.02	RecName: Full=Serine/threonine-protein phosphatase PP1-alpha catalytic subunit; Short=PP-1A; EC=3.1.3.16;
456	1	UniProt_SwissProt	P16254	106	12616	3	3	3	3	2	RecName: Full=Signal recognition particle 14 kDa protein; Short=SRP14; Contains: RecName: Full=Signal recognition particle 14 kDa protein, N-terminally processed;
480	1	UniProt_SwissProt	P62843	97	17029	11	6	4	3	2	RecName: Full=40S ribosomal protein S15; AltName: Full=RIG protein;
97	1	UniProt_SwissProt	P97855	382	51854	14	13	11	10	1.98	RecName: Full=Ras GTPase-activating protein-binding protein 1; Short=G3BP-1; EC=3.6.4.12; EC=3.6.4.13; AltName: Full=ATP-dependent DNA helicase VIII; AltName: Full=GAP SH3 domain-binding protein 1; AltName: Full=HDH-VIII;
99	1	UniProt_SwissProt	P56480	381	56265	14	13	13	12	1.97	RecName: Full=ATP synthase subunit beta, mitochondrial; EC=3.6.3.14; Flags: Precursor;
183	3	UniProt_SwissProt	P43275	192	21772	6	6	5	5	1.93	RecName: Full=Histone H1.1; AltName: Full=H1 VAR.3; AltName: Full=Histone H1a; Short=H1a;
34	4	UniProt_SwissProt	Q9CX86	262	30683	11	8	9	7	1.93	RecName: Full=Heterogeneous nuclear ribonucleoprotein A0; Short=hnRNP A0;
47	1	UniProt_SwissProt	O08810	580	110261	34	27	29	25	1.92	RecName: Full=116 kDa U5 small nuclear ribonucleoprotein component; AltName: Full=Elongation factor Tu GTP-binding domain-containing protein 2; AltName: Full=U5 snRNP-specific protein, 116 kDa; Short=U5-116 kDa;
85	1	UniProt_SwissProt	P56959	408	52870	24	20	11	9	1.92	RecName: Full=RNA-binding protein FUS; AltName: Full=Protein pigpen;
379	1	UniProt_SwissProt	P83870	130	13138	4	3	4	3	1.89	RecName: Full=PHD finger-like domain-containing protein 5A; Short=PHD finger-like domain protein 5A; AltName: Full=Splicing factor 3B-associated 14 kDa protein; Short=SF3b14b;
42	1	UniProt_SwissProt	Q91YR7	626	107453	31	25	28	22	1.88	RecName: Full=Pre-mRNA-processing factor 6; AltName: Full=PRP6 homolog; AltName: Full=U5 snRNP-associated 102 kDa protein; Short=U5-102 kDa protein;
210	1	UniProt_SwissProt	Q9WUM4	226	53771	14	13	12	12	1.87	RecName: Full=Coronin-1C; AltName: Full=Coronin-3;
71	1	UniProt_SwissProt	Q08943	457	81152	23	19	20	17	1.85	RecName: Full=FACT complex subunit SSRP1; AltName: Full=Facilitates chromatin transcription complex subunit SSRP1; AltName: Full=Recombination signal sequence recognition protein 1; AltName: Full=Structure-specific recognition protein 1; AltName: Full=T160;
183	4	UniProt_SwissProt	P43276	165	22562	7	6	6	5	1.83	RecName: Full=Histone H1.5; AltName: Full=H1 VAR.5; AltName: Full=H1b;
129	1	UniProt_SwissProt	Q8JZX4	312	45504	11	11	10	10	1.82	RecName: Full=Splicing factor 45; AltName: Full=45 kDa-splicing factor; AltName: Full=RNA-binding motif protein 17;
20	1	UniProt_SwissProt	Q99PV0	1121	274754	73	62	64	54	1.81	RecName: Full=Pre-mRNA-processing-splicing factor 8; AltName: Full=Splicing factor Prp8;
393	1	UniProt_SwissProt	Q62189	125	31814	14	8	10	7	1.81	RecName: Full=U1 small nuclear ribonucleoprotein A; Short=U1 snRNP A; Short=U1-A; Short=U1A;
172	1	UniProt_SwissProt	P97461	260	23046	11	9	6	4	1.76	RecName: Full=40S ribosomal protein S5; Contains: RecName: Full=40S ribosomal protein S5, N-terminally processed;
116	1	UniProt_SwissProt	P61979	347	51230	17	14	13	11	1.75	RecName: Full=Heterogeneous nuclear ribonucleoprotein K; Short=hnRNP K;
5	2	UniProt_SwissProt	Q7TPR4	867	103631	37	31	24	21	1.73	RecName: Full=Alpha-actinin-1; AltName: Full=Alpha-actinin cytoskeletal isoform; AltName: Full=F-actin cross-linking protein; AltName: Full=Non-muscle alpha-actinin-1;
139	1	UniProt_SwissProt	Q5SUF2	302	51818	14	12	12	11	1.72	RecName: Full=Luc7-like protein 3; AltName: Full=Cisplatin resistance-associated-overexpressed protein;
268	1	UniProt_SwissProt	P84099	183	23565	9	5	8	4	1.71	RecName: Full=60S ribosomal protein L19;
201	1	UniProt_SwissProt	Q64012	233	33339	9	7	9	7	1.69	RecName: Full=RNA-binding protein Raly; AltName: Full=Maternally-expressed hnRNP C-related protein; AltName: Full=hnRNP associated with lethal yellow protein;
231	1	UniProt_SwissProt	P24369	206	23699	6	5	6	5	1.68	RecName: Full=Peptidyl-prolyl cis-trans isomerase B; Short=PPIase B; EC=5.2.1.8; AltName: Full=CYP-S1; AltName: Full=Cyclophilin B; AltName: Full=Rotamase B; AltName: Full=S-cyclophilin; Short=SCYLP; Flags: Precursor;
103	1	UniProt_SwissProt	Q9ESX5	371	57821	16	13	13	12	1.66	RecName: Full=H/ACA ribonucleoprotein complex subunit 4; EC=5.4.99.-; AltName: Full=Dyskerin; AltName: Full=Nopp140-associated protein of 57 kDa; AltName: Full=Nucleolar protein NAP57; AltName: Full=Nucleolar protein family A member 4; AltName: Full=snoRNP protein DKC1;
230	2	UniProt_SwissProt	Q9D7S7	138	14459	3	3	3	3	1.63	RecName: Full=60S ribosomal protein L22-like 1;
97	2	UniProt_SwissProt	P97379	315	54112	12	12	10	10	1.61	RecName: Full=Ras GTPase-activating protein-binding protein 2; Short=G3BP-2; AltName: Full=GAP SH3 domain-binding protein 2;
15	1	UniProt_SwissProt	Q8VDD5	1340	227429	59	48	54	44	1.61	RecName: Full=Myosin-9; AltName: Full=Cellular myosin heavy chain, type A; AltName: Full=Myosin heavy chain 9; AltName: Full=Myosin heavy chain, non-muscle IIa; AltName: Full=Non-muscle myosin heavy chain A; Short=NMMHC-A; AltName: Full=Non-muscle myosin heavy chain IIa; Short=NMMHC II-a; Short=NMMHC-IIA;
208	2	UniProt_SwissProt	Q9CYI4	226	44307	10	9	9	8	1.61	RecName: Full=Putative RNA-binding protein Luc7-like 1;
161	1	UniProt_SwissProt	P35550	265	34400	14	8	11	7	1.6	RecName: Full=rRNA 2'-O-methyltransferase fibrillarin; EC=2.1.1.-; AltName: Full=Nucleolar protein 1;
221	1	UniProt_SwissProt	P14869	212	34366	8	7	8	7	1.6	RecName: Full=60S acidic ribosomal protein P0; AltName: Full=60S ribosomal protein L10E;
446	1	UniProt_SwissProt	Q80UW8	108	24669	6	5	6	5	1.59	RecName: Full=DNA-directed RNA polymerases I, II, and III subunit RPABC1; Short=RNA polymerases I, II, and III subunit ABC1; AltName: Full=DNA-directed RNA polymerase II subunit E; AltName: Full=RPB5 homolog;
89	1	UniProt_SwissProt	Q9ERG0	402	84635	24	17	23	17	1.59	RecName: Full=LIM domain and actin-binding protein 1; AltName: Full=Epithelial protein lost in neoplasm; Short=mEPLIN;
508	1	UniProt_SwissProt	Q6ZWU9	92	9797	3	2	3	2	1.57	RecName: Full=40S ribosomal protein S27;
33	1	UniProt_SwissProt	O70133	713	150692	41	33	33	27	1.57	RecName: Full=ATP-dependent RNA helicase A; Short=RHA; EC=3.6.4.13; AltName: Full=DEAH box protein 9; Short=mHEL-5; AltName: Full=Nuclear DNA helicase II; Short=NDH II;
151	1	UniProt_SwissProt	Q3UEB3	278	60382	15	13	13	11	1.55	RecName: Full=Poly(U)-binding-splicing factor PUF60; AltName: Full=60 kDa poly(U)-binding-splicing factor;
109	3	UniProt_SwissProt	Q7TMM9	210	50274	14	11	9	7	1.55	RecName: Full=Tubulin beta-2A chain;
109	2	UniProt_SwissProt	P68372	261	50255	15	11	10	8	1.55	RecName: Full=Tubulin beta-4B chain; AltName: Full=Tubulin beta-2C chain;
119	1	UniProt_SwissProt	Q5F2E7	333	75668	18	15	17	14	1.55	RecName: Full=Nuclear fragile X mental retardation-interacting protein 2; AltName: Full=82 kDa FMRP-interacting protein; Short=82-FIP; AltName: Full=FMRP-interacting protein 2;
56	1	UniProt_SwissProt	Q6DFW4	509	60818	15	14	12	11	1.54	RecName: Full=Nucleolar protein 58; AltName: Full=MSSP; AltName: Full=Nucleolar protein 5; AltName: Full=SIK-similar protein;
393	2	UniProt_SwissProt	Q9CQI7	119	25307	7	5	6	4	1.53	RecName: Full=U2 small nuclear ribonucleoprotein B''; Short=U2 snRNP B'';
429	1	UniProt_SwissProt	Q9CQS8	113	10009	2	2	2	2	1.52	RecName: Full=Protein transport protein Sec61 subunit beta;
387	1	UniProt_SwissProt	Q9CXW4	127	20468	5	4	5	4	1.5	RecName: Full=60S ribosomal protein L11;
62	1	UniProt_SwissProt	P11103	505	113827	33	23	29	22	1.5	RecName: Full=Poly [ADP-ribose] polymerase 1; Short=PARP-1; EC=2.4.2.30; AltName: Full=ADP-ribosyltransferase diphtheria toxin-like 1; Short=ARTD1; AltName: Full=NAD(+) ADP-ribosyltransferase 1; Short=ADPRT 1; AltName: Full=Poly[ADP-ribose] synthase 1; Short=msPARP;
560	1	UniProt_SwissProt	P18608	80	10146	3	2	2	2	1.49	RecName: Full=Non-histone chromosomal protein HMG-14; AltName: Full=High mobility group nucleosome-binding domain-containing protein 1;
96	1	UniProt_SwissProt	O55028	384	46786	13	12	9	8	1.48	RecName: Full=[3-methyl-2-oxobutanoate dehydrogenase [lipoamide]] kinase, mitochondrial; EC=2.7.11.4; AltName: Full=Branched-chain alpha-ketoacid dehydrogenase kinase; Short=BCKD-kinase; Short=BCKDHKIN; Flags: Precursor;
84	1	UniProt_SwissProt	Q587J6	411	88705	19	17	18	16	1.47	RecName: Full=LINE-1 type transposase domain-containing protein 1; AltName: Full=ES cell-associated protein 11;
208	1	UniProt_SwissProt	Q7TNC4	226	46954	10	9	10	9	1.47	RecName: Full=Putative RNA-binding protein Luc7-like 2; AltName: Full=CGI-74 homolog;
202	1	UniProt_SwissProt	P57776	232	31388	9	6	8	5	1.45	RecName: Full=Elongation factor 1-delta; Short=EF-1-delta;
524	1	UniProt_SwissProt	P62717	89	21004	6	4	6	4	1.44	RecName: Full=60S ribosomal protein L18a;
232	1	UniProt_SwissProt	Q9CSU0	205	36975	9	7	9	7	1.44	RecName: Full=Regulation of nuclear pre-mRNA domain-containing protein 1B; AltName: Full=Cell cycle-related and expression-elevated protein in tumor;
261	1	UniProt_SwissProt	Q9CY57	187	26568	6	5	4	3	1.42	RecName: Full=Chromatin target of PRMT1 protein; AltName: Full=Friend of PRMT1 protein; AltName: Full=Small arginine- and glycine-rich protein; Short=SRAG;
123	1	UniProt_SwissProt	Q6NVF9	322	59287	12	11	9	8	1.4	RecName: Full=Cleavage and polyadenylation specificity factor subunit 6;
344	1	UniProt_SwissProt	P61514	143	10497	4	2	4	2	1.4	RecName: Full=60S ribosomal protein L37a;
145	2	UniProt_SwissProt	P63087	230	37701	7	7	7	7	1.39	RecName: Full=Serine/threonine-protein phosphatase PP1-gamma catalytic subunit; Short=PP-1G; EC=3.1.3.16; AltName: Full=Protein phosphatase 1C catalytic subunit;
35	1	UniProt_SwissProt	Q99NB9	700	146465	35	29	31	26	1.39	RecName: Full=Splicing factor 3B subunit 1; AltName: Full=Pre-mRNA-splicing factor SF3b 155 kDa subunit; Short=SF3b155; AltName: Full=Spliceosome-associated protein 155; Short=SAP 155;
145	3	UniProt_SwissProt	P62141	227	37961	7	7	7	7	1.38	RecName: Full=Serine/threonine-protein phosphatase PP1-beta catalytic subunit; Short=PP-1B; EC=3.1.3.16; EC=3.1.3.53;
30	1	UniProt_SwissProt	Q921M3	777	136548	34	30	27	23	1.38	RecName: Full=Splicing factor 3B subunit 3; AltName: Full=Pre-mRNA-splicing factor SF3b 130 kDa subunit; Short=SF3b130; AltName: Full=Spliceosome-associated protein 130; Short=SAP 130;
303	1	UniProt_SwissProt	O35130	167	27242	5	5	5	5	1.37	RecName: Full=Ribosomal RNA small subunit methyltransferase NEP1; EC=2.1.1.-; AltName: Full=18S rRNA (pseudouridine-N1-)-methyltransferase NEP1; AltName: Full=Nucleolar protein EMG1 homolog; AltName: Full=Protein C2f; AltName: Full=Ribosome biogenesis protein NEP1;
318	1	UniProt_SwissProt	Q99L45	157	38410	8	7	7	7	1.36	RecName: Full=Eukaryotic translation initiation factor 2 subunit 2; AltName: Full=Eukaryotic translation initiation factor 2 subunit beta; Short=eIF-2-beta;
159	1	UniProt_SwissProt	Q8VDW0	267	49549	12	10	11	9	1.36	RecName: Full=ATP-dependent RNA helicase DDX39A; EC=3.6.4.13; AltName: Full=DEAD box protein 39;
159	2	UniProt_SwissProt	Q9Z1N5	199	49460	11	9	11	9	1.36	RecName: Full=Spliceosome RNA helicase Ddx39b; EC=3.6.4.13; AltName: Full=56 kDa U2AF65-associated protein; AltName: Full=DEAD box protein UAP56; AltName: Full=HLA-B-associated transcript 1 protein;
422	1	UniProt_SwissProt	P12815	116	21911	4	4	4	4	1.35	RecName: Full=Programmed cell death protein 6; AltName: Full=ALG-257; AltName: Full=PMP41; AltName: Full=Probable calcium-binding protein ALG-2;
46	1	UniProt_SwissProt	Q7TQH0	593	110865	26	22	21	17	1.35	RecName: Full=Ataxin-2-like protein;
197	1	UniProt_SwissProt	Q9JKB3	236	38790	9	7	9	7	1.34	RecName: Full=Y-box-binding protein 3; AltName: Full=Cold shock domain-containing protein A; AltName: Full=DNA-binding protein A; AltName: Full=Y-box protein 3;
166	1	UniProt_SwissProt	O09106	263	55610	13	12	8	7	1.34	RecName: Full=Histone deacetylase 1; Short=HD1; EC=3.5.1.98;
16	1	UniProt_SwissProt	Q6PR54	1297	268116	61	49	56	45	1.34	RecName: Full=Telomere-associated protein RIF1; AltName: Full=Rap1-interacting factor 1 homolog; Short=mRif1;
60	1	UniProt_SwissProt	Q8K019	508	106053	27	22	22	17	1.33	RecName: Full=Bcl-2-associated transcription factor 1; Short=Btf;
564	1	UniProt_SwissProt	Q8BMJ3	79	16564	3	3	3	3	1.33	RecName: Full=Eukaryotic translation initiation factor 1A, X-chromosomal; Short=eIF-1A X isoform; AltName: Full=Eukaryotic translation initiation factor 4C; Short=eIF-4C;
321	1	UniProt_SwissProt	Q62394	156	39153	8	7	7	7	1.32	RecName: Full=Zinc finger protein 185; AltName: Full=LIM domain protein Zfp185; AltName: Full=P1-A;
80	2	UniProt_SwissProt	P68368	271	50634	15	12	11	9	1.31	RecName: Full=Tubulin alpha-4A chain; AltName: Full=Alpha-tubulin 4; AltName: Full=Alpha-tubulin isotype M-alpha-4; AltName: Full=Tubulin alpha-4 chain;
757	1	UniProt_SwissProt	P40630	52	28198	8	5	7	5	1.3	RecName: Full=Transcription factor A, mitochondrial; Short=mtTFA; AltName: Full=Testis-specific high mobility group protein; Short=TS-HMG; Flags: Precursor;
118	1	UniProt_SwissProt	A2APB8	342	86297	19	16	17	15	1.28	RecName: Full=Targeting protein for Xklp2;
36	1	UniProt_SwissProt	Q5NBX1	694	144518	31	26	28	24	1.27	RecName: Full=Protein cordon-bleu;
407	1	UniProt_SwissProt	Q60605	121	17090	3	3	3	3	1.27	RecName: Full=Myosin light polypeptide 6; AltName: Full=17 kDa myosin light chain; Short=LC17; AltName: Full=Myosin light chain 3; Short=MLC-3; AltName: Full=Myosin light chain alkali 3; Short=Myosin light chain A3; AltName: Full=Smooth muscle and nonmuscle myosin light chain alkali 6;
443	1	UniProt_SwissProt	Q9CQL1	109	17138	4	3	4	3	1.27	RecName: Full=Protein mago nashi homolog 2;
365	1	UniProt_SwissProt	Q99J62	136	40355	9	7	9	7	1.26	RecName: Full=Replication factor C subunit 4; AltName: Full=Activator 1 subunit 4;
132	1	UniProt_SwissProt	O88477	309	63753	12	11	11	11	1.26	RecName: Full=Insulin-like growth factor 2 mRNA-binding protein 1; Short=IGF2 mRNA-binding protein 1; Short=IMP-1; AltName: Full=Coding region determinant-binding protein; Short=CRD-BP; AltName: Full=IGF-II mRNA-binding protein 1; AltName: Full=VICKZ family member 1; AltName: Full=Zipcode-binding protein 1; Short=ZBP-1;
466	1	UniProt_SwissProt	Q923G2	103	17189	3	3	3	3	1.26	RecName: Full=DNA-directed RNA polymerases I, II, and III subunit RPABC3; Short=RNA polymerases I, II, and III subunit ABC3; AltName: Full=DNA-directed RNA polymerase II subunit H; AltName: Full=RPB17; AltName: Full=RPB8 homolog;
122	1	UniProt_SwissProt	P46061	325	64005	14	12	12	11	1.25	RecName: Full=Ran GTPase-activating protein 1; Short=RanGAP1;
155	1	UniProt_SwissProt	Q61584	275	76517	14	13	14	13	1.23	RecName: Full=Fragile X mental retardation syndrome-related protein 1; Short=mFxr1p;
783	1	UniProt_SwissProt	P47955	48	11582	2	2	2	2	1.23	RecName: Full=60S acidic ribosomal protein P1;
162	1	UniProt_SwissProt	Q8K4Z5	265	88546	18	15	16	14	1.23	RecName: Full=Splicing factor 3A subunit 1; AltName: Full=SF3a120;
104	1	UniProt_SwissProt	Q9D824	369	64977	12	12	10	10	1.23	RecName: Full=Pre-mRNA 3'-end-processing factor FIP1; AltName: Full=FIP1-like 1 protein;
547	1	UniProt_SwissProt	Q922Q8	82	35312	7	6	7	6	1.22	RecName: Full=Leucine-rich repeat-containing protein 59;
198	1	UniProt_SwissProt	Q8BKX1	235	59428	12	10	11	10	1.21	RecName: Full=Brain-specific angiogenesis inhibitor 1-associated protein 2; Short=BAI-associated protein 2; Short=BAI1-associated protein 2; AltName: Full=Insulin receptor substrate protein of 53 kDa; Short=IRSp53; Short=Insulin receptor substrate p53; AltName: Full=Insulin receptor tyrosine kinase 53 kDa substrate;
733	1	UniProt_SwissProt	P17095	54	11607	2	2	2	2	1.21	RecName: Full=High mobility group protein HMG-I/HMG-Y; Short=HMG-I(Y); AltName: Full=High mobility group AT-hook protein 1; Short=High mobility group protein A1;
563	1	UniProt_SwissProt	Q9CY66	79	23631	5	4	5	4	1.21	RecName: Full=H/ACA ribonucleoprotein complex subunit 1; AltName: Full=Nucleolar protein family A member 1; AltName: Full=snoRNP protein GAR1;
503	1	UniProt_SwissProt	Q6NZB0	93	29794	8	6	7	5	1.2	RecName: Full=DnaJ homolog subfamily C member 8;
18	1	UniProt_SwissProt	Q6P4T2	1154	246045	52	44	44	38	1.2	RecName: Full=U5 small nuclear ribonucleoprotein 200 kDa helicase; EC=3.6.4.13; AltName: Full=BRR2 homolog; AltName: Full=U5 snRNP-specific 200 kDa protein; Short=U5-200KD;
135	1	UniProt_SwissProt	Q9D0E1	305	77940	17	13	17	13	1.2	RecName: Full=Heterogeneous nuclear ribonucleoprotein M; Short=hnRNP M;
180	1	UniProt_SwissProt	P54823	251	54556	10	10	9	9	1.18	RecName: Full=Probable ATP-dependent RNA helicase DDX6; EC=3.6.4.13; AltName: Full=ATP-dependent RNA helicase p54; AltName: Full=DEAD box protein 6; AltName: Full=Oncogene RCK homolog;
245	1	UniProt_SwissProt	P35979	198	17965	6	6	3	3	1.18	RecName: Full=60S ribosomal protein L12;
252	1	UniProt_SwissProt	P70372	196	36317	9	6	9	6	1.18	RecName: Full=ELAV-like protein 1; AltName: Full=Elav-like generic protein; AltName: Full=Hu-antigen R; Short=HuR; AltName: Full=MelG;
11	1	UniProt_SwissProt	Q9ERU9	1681	344727	77	61	69	53	1.16	RecName: Full=E3 SUMO-protein ligase RanBP2; EC=6.3.2.-; AltName: Full=Ran-binding protein 2; Short=RanBP2;
23	1	UniProt_SwissProt	Q8BTM8	1025	283897	53	49	50	46	1.15	RecName: Full=Filamin-A; Short=FLN-A; AltName: Full=Actin-binding protein 280; Short=ABP-280; AltName: Full=Alpha-filamin; AltName: Full=Endothelial actin-binding protein; AltName: Full=Filamin-1; AltName: Full=Non-muscle filamin;
234	1	UniProt_SwissProt	Q99KP6	204	55661	12	9	11	8	1.15	RecName: Full=Pre-mRNA-processing factor 19; AltName: Full=Nuclear matrix protein 200; AltName: Full=PRP19/PSO4 homolog; AltName: Full=Senescence evasion factor;
181	1	UniProt_SwissProt	Q9CXY6	250	43263	8	8	7	7	1.14	RecName: Full=Interleukin enhancer-binding factor 2; AltName: Full=Nuclear factor of activated T-cells 45 kDa;
293	1	UniProt_SwissProt	Q8BL97	171	31027	10	7	7	5	1.13	RecName: Full=Serine/arginine-rich splicing factor 7; AltName: Full=Splicing factor, arginine/serine-rich 7;
653	1	UniProt_SwissProt	P84089	65	12422	5	3	4	2	1.11	RecName: Full=Enhancer of rudimentary homolog; Short=Mer;
53	1	UniProt_SwissProt	Q9DBR7	532	115383	23	19	20	18	1.09	RecName: Full=Protein phosphatase 1 regulatory subunit 12A; AltName: Full=Myosin phosphatase-targeting subunit 1; Short=Myosin phosphatase target subunit 1;
146	1	UniProt_SwissProt	P25976	286	89795	22	15	19	14	1.09	RecName: Full=Nucleolar transcription factor 1; AltName: Full=Upstream-binding factor 1; Short=UBF-1;
276	1	UniProt_SwissProt	Q60668	180	38501	7	6	6	5	1.08	RecName: Full=Heterogeneous nuclear ribonucleoprotein D0; Short=hnRNP D0; AltName: Full=AU-rich element RNA-binding protein 1;
65	1	UniProt_SwissProt	Q62318	480	90558	23	16	18	12	1.08	RecName: Full=Transcription intermediary factor 1-beta; Short=TIF1-beta; AltName: Full=E3 SUMO-protein ligase TRIM28; EC=6.3.2.-; AltName: Full=KRAB-A-interacting protein; AltName: Full=KRIP-1; AltName: Full=Tripartite motif-containing protein 28;
375	1	UniProt_SwissProt	Q6PFR5	132	32354	7	5	7	5	1.07	RecName: Full=Transformer-2 protein homolog alpha; Short=TRA-2 alpha; Short=TRA2-alpha; AltName: Full=Transformer-2 protein homolog A;
102	1	UniProt_SwissProt	P70168	372	98377	18	16	16	15	1.06	RecName: Full=Importin subunit beta-1; AltName: Full=Karyopherin subunit beta-1; AltName: Full=Nuclear factor p97; AltName: Full=Pore targeting complex 97 kDa subunit; Short=PTAC97; AltName: Full=SCG;
113	1	UniProt_SwissProt	Q3TIX9	358	65505	13	11	12	10	1.06	RecName: Full=U4/U6.U5 tri-snRNP-associated protein 2; AltName: Full=Inactive ubiquitin-specific peptidase 39;
289	1	UniProt_SwissProt	P52432	172	39310	7	6	7	6	1.05	RecName: Full=DNA-directed RNA polymerases I and III subunit RPAC1; Short=DNA-directed RNA polymerase I subunit C; Short=RNA polymerases I and III subunit AC1; AltName: Full=AC40; AltName: Full=DNA-directed RNA polymerases I and III 40 kDa polypeptide; Short=RPA40; AltName: Full=RPC40;
176	2	UniProt_SwissProt	Q9Z2X1	198	46043	10	7	9	7	1.05	RecName: Full=Heterogeneous nuclear ribonucleoprotein F; Short=hnRNP F; Contains: RecName: Full=Heterogeneous nuclear ribonucleoprotein F, N-terminally processed;
537	1	UniProt_SwissProt	Q3UL36	84	32868	9	5	8	5	1.05	RecName: Full=Arginine and glutamate-rich protein 1;
224	1	UniProt_SwissProt	Q8BG81	210	46332	9	7	8	7	1.04	RecName: Full=Polymerase delta-interacting protein 3; AltName: Full=S6K1 Aly/REF-like target; Short=SKAR;
57	2	UniProt_SwissProt	P60843	273	46353	9	7	8	6	1.04	RecName: Full=Eukaryotic initiation factor 4A-I; Short=eIF-4A-I; Short=eIF4A-I; EC=3.6.4.13; AltName: Full=ATP-dependent RNA helicase eIF4A-1;
273	1	UniProt_SwissProt	Q6PE01	180	39707	8	6	8	6	1.04	RecName: Full=U5 small nuclear ribonucleoprotein 40 kDa protein; Short=U5 snRNP 40 kDa protein; AltName: Full=WD repeat-containing protein 57;
705	1	UniProt_SwissProt	P59999	58	19768	3	3	3	3	1.03	RecName: Full=Actin-related protein 2/3 complex subunit 4; AltName: Full=Arp2/3 complex 20 kDa subunit; Short=p20-ARC;
470	1	UniProt_SwissProt	P51881	102	33138	5	5	5	5	1.03	RecName: Full=ADP/ATP translocase 2; AltName: Full=ADP,ATP carrier protein 2; AltName: Full=Adenine nucleotide translocator 2; Short=ANT 2; AltName: Full=Solute carrier family 25 member 5; Contains: RecName: Full=ADP/ATP translocase 2, N-terminally processed;
963	1	UniProt_SwissProt	P62892	29	6403	1	1	1	1	1.02	RecName: Full=60S ribosomal protein L39;
280	1	UniProt_SwissProt	P26369	178	53825	8	8	7	7	1.02	RecName: Full=Splicing factor U2AF 65 kDa subunit; AltName: Full=U2 auxiliary factor 65 kDa subunit; AltName: Full=U2 snRNP auxiliary factor large subunit;
298	1	UniProt_SwissProt	Q8JZM7	169	60653	12	10	10	9	1.02	RecName: Full=Parafibromin; AltName: Full=Cell division cycle protein 73 homolog; AltName: Full=Hyperparathyroidism 2 protein homolog;
431	1	UniProt_SwissProt	Q8BGT7	113	26908	5	4	5	4	1.01	RecName: Full=Survival of motor neuron-related-splicing factor 30; AltName: Full=30 kDa splicing factor SMNrp; AltName: Full=SMN-related protein; AltName: Full=Survival motor neuron domain-containing protein 1;
661	1	UniProt_SwissProt	P62855	64	13292	4	2	4	2	1.01	RecName: Full=40S ribosomal protein S26;
375	2	UniProt_SwissProt	P62996	118	33760	9	5	8	5	1.01	RecName: Full=Transformer-2 protein homolog beta; Short=TRA-2 beta; Short=TRA2-beta; AltName: Full=Silica-induced gene 41 protein; Short=SIG-41; AltName: Full=Splicing factor, arginine/serine-rich 10; AltName: Full=Transformer-2 protein homolog B;
311	1	UniProt_SwissProt	O55135	160	27007	5	5	4	4	1.01	RecName: Full=Eukaryotic translation initiation factor 6; Short=eIF-6; AltName: Full=B4 integrin interactor; AltName: Full=CAB; AltName: Full=p27(BBP);
117	1	UniProt_SwissProt	P63038	347	61088	12	9	11	9	1.01	RecName: Full=60 kDa heat shock protein, mitochondrial; AltName: Full=60 kDa chaperonin; AltName: Full=Chaperonin 60; Short=CPN60; AltName: Full=HSP-65; AltName: Full=Heat shock protein 60; Short=HSP-60; Short=Hsp60; AltName: Full=Mitochondrial matrix protein P1; Flags: Precursor;
187	1	UniProt_SwissProt	Q60598	244	61384	14	9	14	9	1	RecName: Full=Src substrate cortactin;
251	1	UniProt_SwissProt	Q9Z2N8	196	47931	8	7	8	7	0.99	RecName: Full=Actin-like protein 6A; AltName: Full=53 kDa BRG1-associated factor A; AltName: Full=Actin-related protein Baf53a; AltName: Full=BRG1-associated factor 53A; Short=BAF53A;
193	1	UniProt_SwissProt	Q99LF4	239	55727	13	9	11	8	0.97	RecName: Full=tRNA-splicing ligase RtcB homolog; EC=6.5.1.3; AltName: Full=Focal adhesion-associated protein; Short=FAAP;
297	1	UniProt_SwissProt	Q99LC2	169	49149	10	8	8	7	0.96	RecName: Full=Cleavage stimulation factor subunit 1; AltName: Full=CF-1 50 kDa subunit; AltName: Full=Cleavage stimulation factor 50 kDa subunit; Short=CSTF 50 kDa subunit; Short=CstF-50;
237	1	UniProt_SwissProt	Q9WV55	201	28065	5	4	5	4	0.95	RecName: Full=Vesicle-associated membrane protein-associated protein A; Short=VAMP-A; Short=VAMP-associated protein A; Short=VAP-A; AltName: Full=33 kDa VAMP-associated protein; Short=VAP-33;
137	1	UniProt_SwissProt	Q8BMK4	303	63711	10	9	9	8	0.95	RecName: Full=Cytoskeleton-associated protein 4; AltName: Full=63-kDa cytoskeleton-linking membrane protein; Short=Climp-63; Short=p63;
336	1	UniProt_SwissProt	Q9CQE8	147	28249	5	4	5	4	0.95	RecName: Full=UPF0568 protein C14orf166 homolog;
244	1	UniProt_SwissProt	P68040	198	35511	10	6	9	5	0.94	RecName: Full=Guanine nucleotide-binding protein subunit beta-2-like 1; AltName: Full=12-3; AltName: Full=Receptor for activated C kinase; AltName: Full=Receptor of activated protein kinase C 1; Short=RACK1; AltName: Full=p205; Contains: RecName: Full=Guanine nucleotide-binding protein subunit beta-2-like 1, N-terminally processed;
738	1	UniProt_SwissProt	Q9CPT5	53	21183	3	3	3	3	0.94	RecName: Full=Nucleolar protein 16;
197	2	UniProt_SwissProt	P62960	214	35709	5	5	5	5	0.93	RecName: Full=Nuclease-sensitive element-binding protein 1; AltName: Full=CCAAT-binding transcription factor I subunit A; Short=CBF-A; AltName: Full=DNA-binding protein B; Short=DBPB; AltName: Full=Enhancer factor I subunit A; Short=EFI-A; AltName: Full=Y-box transcription factor; AltName: Full=Y-box-binding protein 1; Short=YB-1;
295	1	UniProt_SwissProt	P09242	170	57820	9	8	9	8	0.92	RecName: Full=Alkaline phosphatase, tissue-nonspecific isozyme; Short=AP-TNAP; Short=TNSALP; EC=3.1.3.1; AltName: Full=Alkaline phosphatase 2; AltName: Full=Alkaline phosphatase liver/bone/kidney isozyme; Flags: Precursor;
306	1	UniProt_SwissProt	Q6ZWX6	165	36371	5	5	5	5	0.91	RecName: Full=Eukaryotic translation initiation factor 2 subunit 1; AltName: Full=Eukaryotic translation initiation factor 2 subunit alpha; Short=eIF-2-alpha; Short=eIF-2A; Short=eIF-2alpha;
672	1	UniProt_SwissProt	P11031	62	14418	3	2	3	2	0.91	RecName: Full=Activated RNA polymerase II transcriptional coactivator p15; AltName: Full=Positive cofactor 4; Short=PC4; AltName: Full=SUB1 homolog; AltName: Full=Single-stranded DNA-binding protein p9; AltName: Full=p14;
152	1	UniProt_SwissProt	Q8VH51	278	59655	12	9	9	6	0.88	RecName: Full=RNA-binding protein 39; AltName: Full=Coactivator of activating protein 1 and estrogen receptors; Short=Coactivator of AP-1 and ERs; AltName: Full=RNA-binding motif protein 39; AltName: Full=RNA-binding region-containing protein 2; AltName: Full=Transcription coactivator CAPER;
219	1	UniProt_SwissProt	Q9QWT9	212	74678	14	10	13	10	0.88	RecName: Full=Kinesin-like protein KIFC1;
779	1	UniProt_SwissProt	Q63871	49	7198	1	1	1	1	0.88	RecName: Full=DNA-directed RNA polymerases I, II, and III subunit RPABC4; Short=RNA polymerases I, II, and III subunit ABC4; AltName: Full=DNA-directed RNA polymerase II subunit K; AltName: Full=Metallothionein-I gene transcription activator; AltName: Full=RPB10alpha;
88	1	UniProt_SwissProt	Q8CFI7	403	135250	20	18	20	18	0.88	RecName: Full=DNA-directed RNA polymerase II subunit RPB2; EC=2.7.7.6; AltName: Full=DNA-directed RNA polymerase II 140 kDa polypeptide; AltName: Full=DNA-directed RNA polymerase II subunit B; AltName: Full=RNA polymerase II subunit 2; AltName: Full=RNA polymerase II subunit B2;
354	1	UniProt_SwissProt	P67778	139	29859	5	4	5	4	0.88	RecName: Full=Prohibitin; AltName: Full=B-cell receptor-associated protein 32; Short=BAP 32;
299	1	UniProt_SwissProt	Q8K2T8	169	60652	8	8	7	7	0.86	RecName: Full=RNA polymerase II-associated factor 1 homolog;
263	1	UniProt_SwissProt	P60335	186	37987	8	5	7	4	0.86	RecName: Full=Poly(rC)-binding protein 1; AltName: Full=Alpha-CP1; AltName: Full=Heterogeneous nuclear ribonucleoprotein E1; Short=hnRNP E1;
112	1	UniProt_SwissProt	Q08509	360	92022	13	12	12	11	0.85	RecName: Full=Epidermal growth factor receptor kinase substrate 8;
200	1	UniProt_SwissProt	B2RY56	235	99833	23	15	20	13	0.85	RecName: Full=RNA-binding protein 25; AltName: Full=RNA-binding motif protein 25;
542	1	UniProt_SwissProt	Q9DB42	83	15252	2	2	1	1	0.84	RecName: Full=Zinc finger protein 593; AltName: Full=Zinc finger protein T86;
476	1	UniProt_SwissProt	P14602	98	23057	4	3	4	3	0.84	RecName: Full=Heat shock protein beta-1; Short=HspB1; AltName: Full=Growth-related 25 kDa protein; AltName: Full=Heat shock 25 kDa protein; Short=HSP 25; AltName: Full=Heat shock 27 kDa protein; Short=HSP 27; AltName: Full=p25;
131	1	UniProt_SwissProt	Q9QXK7	309	78082	11	11	10	10	0.83	RecName: Full=Cleavage and polyadenylation specificity factor subunit 3; EC=3.1.27.-; AltName: Full=Cleavage and polyadenylation specificity factor 73 kDa subunit; Short=CPSF 73 kDa subunit; Short=mRNA 3'-end-processing endonuclease CPSF-73;
288	1	UniProt_SwissProt	Q8BK63	172	39118	5	5	5	5	0.83	RecName: Full=Casein kinase I isoform alpha; Short=CKI-alpha; EC=2.7.11.1; AltName: Full=CK1;
309	1	UniProt_SwissProt	Q9D1J3	161	23575	4	3	4	3	0.82	RecName: Full=SAP domain-containing ribonucleoprotein; AltName: Full=Nuclear protein Hcc-1;
154	1	UniProt_SwissProt	Q922K7	276	87098	12	11	12	11	0.82	RecName: Full=Putative ribosomal RNA methyltransferase NOP2; EC=2.1.1.-; AltName: Full=Nucleolar protein 1; AltName: Full=Nucleolar protein 2 homolog; AltName: Full=Proliferating-cell nucleolar antigen p120; AltName: Full=Proliferation-associated nucleolar protein p120;
166	2	UniProt_SwissProt	P70288	140	55837	11	9	7	5	0.81	RecName: Full=Histone deacetylase 2; Short=HD2; EC=3.5.1.98; AltName: Full=YY1 transcription factor-binding protein;
163	1	UniProt_SwissProt	Q9ESZ8	265	112708	18	14	18	14	0.8	RecName: Full=General transcription factor II-I; Short=GTFII-I; Short=TFII-I; AltName: Full=Bruton tyrosine kinase-associated protein 135; Short=BAP-135; Short=BTK-associated protein 135;
272	1	UniProt_SwissProt	P17225	181	56671	11	8	9	6	0.79	RecName: Full=Polypyrimidine tract-binding protein 1; Short=PTB; AltName: Full=Heterogeneous nuclear ribonucleoprotein I; Short=hnRNP I;
883	1	UniProt_SwissProt	P62876	39	7868	1	1	1	1	0.79	RecName: Full=DNA-directed RNA polymerases I, II, and III subunit RPABC5; Short=RNA polymerases I, II, and III subunit ABC5; AltName: Full=DNA-directed RNA polymerase III subunit L; AltName: Full=RPB10 homolog;
406	1	UniProt_SwissProt	Q9Z2D8	122	32376	4	4	4	4	0.79	RecName: Full=Methyl-CpG-binding domain protein 3; AltName: Full=Methyl-CpG-binding protein MBD3;
39	1	UniProt_SwissProt	Q80WE4	634	204986	30	25	29	24	0.78	RecName: Full=Kinesin-like protein KIF20B; AltName: Full=Kinesin family member 20B; AltName: Full=Kinesin-related motor interacting with PIN1; AltName: Full=M-phase phosphoprotein 1; Short=MPP1;
140	1	UniProt_SwissProt	Q60759	299	49088	8	6	8	6	0.78	RecName: Full=Glutaryl-CoA dehydrogenase, mitochondrial; Short=GCD; EC=1.3.8.6; Flags: Precursor;
310	1	UniProt_SwissProt	Q9Z1M8	161	65690	12	9	10	8	0.78	RecName: Full=Protein Red; AltName: Full=Cytokine IK; AltName: Full=IK factor; AltName: Full=Protein RER;
176	1	UniProt_SwissProt	O35737	258	49454	10	7	8	6	0.77	RecName: Full=Heterogeneous nuclear ribonucleoprotein H; Short=hnRNP H; Contains: RecName: Full=Heterogeneous nuclear ribonucleoprotein H, N-terminally processed;
342	1	UniProt_SwissProt	P11260	144	41315	6	5	6	5	0.77	RecName: Full=Putative transposase element L1Md-A101/L1Md-A102/L1Md-A2;
204	1	UniProt_SwissProt	P02535	230	57906	9	7	8	6	0.77	RecName: Full=Keratin, type I cytoskeletal 10; AltName: Full=56 kDa cytokeratin; AltName: Full=Cytokeratin-10; Short=CK-10; AltName: Full=Keratin, type I cytoskeletal 59 kDa; AltName: Full=Keratin-10; Short=K10;
278	1	UniProt_SwissProt	P47754	179	33118	6	4	6	4	0.77	RecName: Full=F-actin-capping protein subunit alpha-2; AltName: Full=CapZ alpha-2;
278	2	UniProt_SwissProt	P47753	133	33090	7	4	7	4	0.77	RecName: Full=F-actin-capping protein subunit alpha-1; AltName: Full=CapZ alpha-1;
354	2	UniProt_SwissProt	O35129	106	33276	4	4	4	4	0.76	RecName: Full=Prohibitin-2; AltName: Full=B-cell receptor-associated protein BAP37; AltName: Full=Repressor of estrogen receptor activity;
302	2	UniProt_SwissProt	Q61029	164	50399	8	6	8	6	0.75	RecName: Full=Lamina-associated polypeptide 2, isoforms beta/delta/epsilon/gamma; AltName: Full=Thymopoietin isoforms beta/delta/epsilon/gamma; Short=TP beta/delta/epsilon/gamma;
271	1	UniProt_SwissProt	Q9DAW6	181	59018	7	7	7	7	0.75	RecName: Full=U4/U6 small nuclear ribonucleoprotein Prp4; AltName: Full=U4/U6 snRNP 60 kDa protein; AltName: Full=WD splicing factor Prp4;
386	1	UniProt_SwissProt	Q9D554	127	59147	10	7	9	7	0.75	RecName: Full=Splicing factor 3A subunit 3; AltName: Full=SF3a60; AltName: Full=Spliceosome-associated protein 61; Short=SAP 61;
349	1	UniProt_SwissProt	Q9Z0N1	141	51603	7	7	6	6	0.73	RecName: Full=Eukaryotic translation initiation factor 2 subunit 3, X-linked; AltName: Full=Eukaryotic translation initiation factor 2 subunit gamma, X-linked; Short=eIF-2-gamma X;
432	1	UniProt_SwissProt	Q9CYL5	113	17194	2	2	2	2	0.72	RecName: Full=Golgi-associated plant pathogenesis-related protein 1; Short=GAPR-1; Short=Golgi-associated PR-1 protein; AltName: Full=Glioma pathogenesis-related protein 2; Short=GliPR 2;
424	1	UniProt_SwissProt	O70503	114	34948	4	4	4	4	0.71	RecName: Full=Estradiol 17-beta-dehydrogenase 12; EC=1.1.1.62; AltName: Full=17-beta-hydroxysteroid dehydrogenase 12; Short=17-beta-HSD 12; AltName: Full=3-ketoacyl-CoA reductase; Short=KAR; EC=1.3.1.-; AltName: Full=KIK-I;
437	1	UniProt_SwissProt	Q91WM3	111	52645	6	6	6	6	0.71	RecName: Full=U3 small nucleolar RNA-interacting protein 2; AltName: Full=RRP9 homolog; AltName: Full=U3 small nucleolar ribonucleoprotein-associated 55 kDa protein; Short=U3 snoRNP-associated 55 kDa protein; Short=U3-55K;
38	3	UniProt_SwissProt	Q922U2	221	61957	10	9	8	7	0.7	RecName: Full=Keratin, type II cytoskeletal 5; AltName: Full=Cytokeratin-5; Short=CK-5; AltName: Full=Keratin-5; Short=K5; AltName: Full=Type-II keratin Kb5;
241	1	UniProt_SwissProt	Q8CGZ0	199	106501	14	12	14	12	0.7	RecName: Full=Calcium homeostasis endoplasmic reticulum protein; AltName: Full=SR-related CTD-associated factor 6;
75	1	UniProt_SwissProt	Q9EPU4	436	162027	24	18	23	18	0.69	RecName: Full=Cleavage and polyadenylation specificity factor subunit 1; AltName: Full=Cleavage and polyadenylation specificity factor 160 kDa subunit; Short=CPSF 160 kDa subunit;
232	2	UniProt_SwissProt	Q8VDS4	70	35907	5	4	5	4	0.69	RecName: Full=Regulation of nuclear pre-mRNA domain-containing protein 1A; AltName: Full=Cyclin-dependent kinase inhibitor 2B-related protein; AltName: Full=p15INK4B-related protein;
250	1	UniProt_SwissProt	Q921F2	196	44918	6	5	6	5	0.69	RecName: Full=TAR DNA-binding protein 43; Short=TDP-43;
235	1	UniProt_SwissProt	Q9R1C7	204	108698	18	13	16	12	0.69	RecName: Full=Pre-mRNA-processing factor 40 homolog A; AltName: Full=Formin-binding protein 11; Short=FBP-11; AltName: Full=Formin-binding protein 3;
434	1	UniProt_SwissProt	O08583	112	26924	6	4	4	3	0.69	RecName: Full=THO complex subunit 4; Short=Tho4; AltName: Full=Ally of AML-1 and LEF-1; AltName: Full=Aly/REF export factor; AltName: Full=REF1-I; AltName: Full=RNA and export factor-binding protein 1; AltName: Full=Transcriptional coactivator Aly/REF;
194	1	UniProt_SwissProt	Q8K202	239	54513	7	6	7	6	0.68	RecName: Full=DNA-directed RNA polymerase I subunit RPA49; Short=RNA polymerase I subunit A49; AltName: Full=DNA-directed RNA polymerase I subunit E; AltName: Full=RNA polymerase I-associated factor 1; AltName: Full=RNA polymerase I-associated factor 53;
130	1	UniProt_SwissProt	Q9EP71	312	109470	15	12	14	12	0.68	RecName: Full=Ankycorbin; AltName: Full=Ankyrin repeat and coiled-coil structure-containing protein; AltName: Full=Novel retinal pigment epithelial cell protein; AltName: Full=Retinoic acid-induced protein 14; AltName: Full=p125;
220	1	UniProt_SwissProt	Q04750	212	91275	14	11	13	10	0.68	RecName: Full=DNA topoisomerase 1; EC=5.99.1.2; AltName: Full=DNA topoisomerase I;
417	1	UniProt_SwissProt	Q9CQ62	118	36476	5	4	4	4	0.67	RecName: Full=2,4-dienoyl-CoA reductase, mitochondrial; EC=1.3.1.34; AltName: Full=2,4-dienoyl-CoA reductase [NADPH]; Short=4-enoyl-CoA reductase [NADPH]; Flags: Precursor;
420	1	UniProt_SwissProt	P63280	117	18223	4	3	2	2	0.67	RecName: Full=SUMO-conjugating enzyme UBC9; EC=6.3.2.-; AltName: Full=SUMO-protein ligase; AltName: Full=Ubiquitin carrier protein 9; Short=mUBC9; AltName: Full=Ubiquitin carrier protein I; AltName: Full=Ubiquitin-conjugating enzyme E2 I; AltName: Full=Ubiquitin-protein ligase I;
284	1	UniProt_SwissProt	Q8BFV2	174	46729	6	6	4	4	0.66	RecName: Full=PCI domain-containing protein 2; AltName: Full=CSN12-like protein;
124	1	UniProt_SwissProt	Q8CH18	321	132663	16	14	14	13	0.65	RecName: Full=Cell division cycle and apoptosis regulator protein 1; AltName: Full=Cell cycle and apoptosis regulatory protein 1; Short=CARP-1;
810	1	UniProt_SwissProt	P62313	45	9179	1	1	1	1	0.65	RecName: Full=U6 snRNA-associated Sm-like protein LSm6;
391	1	UniProt_SwissProt	Q9D883	125	28311	3	3	3	3	0.64	RecName: Full=Splicing factor U2AF 35 kDa subunit; AltName: Full=U2 auxiliary factor 35 kDa subunit; AltName: Full=U2 snRNP auxiliary factor small subunit;
504	1	UniProt_SwissProt	Q8K194	93	18874	2	2	2	2	0.64	RecName: Full=U4/U6.U5 small nuclear ribonucleoprotein 27 kDa protein; Short=U4/U6.U5 snRNP 27 kDa protein; Short=U4/U6.U5-27K; AltName: Full=U4/U6.U5 tri-snRNP-associated protein 3;
647	1	UniProt_SwissProt	Q6P8I4	66	18951	2	2	2	2	0.64	RecName: Full=PEST proteolytic signal-containing nuclear protein; Short=PCNP; Short=PEST-containing nuclear protein;
763	1	UniProt_SwissProt	Q8BHG9	51	19035	3	2	3	2	0.64	RecName: Full=CGG triplet repeat-binding protein 1; Short=CGG-binding protein 1; AltName: Full=20 kDa CGG-binding protein; AltName: Full=p20-CGGBP DNA-binding protein;
385	1	UniProt_SwissProt	Q4VBE8	128	47979	5	5	5	5	0.63	RecName: Full=WD repeat-containing protein 18;
595	2	UniProt_SwissProt	Q60972	65	47911	5	5	5	5	0.63	RecName: Full=Histone-binding protein RBBP4; AltName: Full=Chromatin assembly factor 1 subunit C; Short=CAF-1 subunit C; AltName: Full=Chromatin assembly factor I p48 subunit; Short=CAF-I 48 kDa subunit; Short=CAF-I p48; AltName: Full=Nucleosome-remodeling factor subunit RBAP48; AltName: Full=Retinoblastoma-binding protein 4; Short=RBBP-4; AltName: Full=Retinoblastoma-binding protein p48;
595	1	UniProt_SwissProt	Q60973	74	48102	5	5	5	5	0.63	RecName: Full=Histone-binding protein RBBP7; AltName: Full=Histone acetyltransferase type B subunit 2; AltName: Full=Nucleosome-remodeling factor subunit RBAP46; AltName: Full=Retinoblastoma-binding protein 7; Short=RBBP-7; AltName: Full=Retinoblastoma-binding protein p46;
263	2	UniProt_SwissProt	Q61990	157	38597	8	4	6	3	0.63	RecName: Full=Poly(rC)-binding protein 2; AltName: Full=Alpha-CP2; AltName: Full=CTBP; Short=CBP; AltName: Full=Putative heterogeneous nuclear ribonucleoprotein X; Short=hnRNP X;
253	1	UniProt_SwissProt	Q9QXS6	195	77981	10	8	9	8	0.62	RecName: Full=Drebrin; AltName: Full=Developmentally-regulated brain protein;
389	1	UniProt_SwissProt	P80315	126	58543	7	6	7	6	0.62	RecName: Full=T-complex protein 1 subunit delta; Short=TCP-1-delta; AltName: Full=A45; AltName: Full=CCT-delta;
740	1	UniProt_SwissProt	P62488	53	19453	2	2	2	2	0.62	RecName: Full=DNA-directed RNA polymerase II subunit RPB7; Short=RNA polymerase II subunit B7; AltName: Full=DNA-directed RNA polymerase II subunit G;
292	1	UniProt_SwissProt	Q61545	171	68705	9	8	8	7	0.62	RecName: Full=RNA-binding protein EWS;
101	1	UniProt_SwissProt	Q6NV83	375	118644	23	15	19	12	0.61	RecName: Full=U2 snRNP-associated SURP motif-containing protein; AltName: Full=140 kDa Ser/Arg-rich domain protein; AltName: Full=U2-associated protein SR140;
334	1	UniProt_SwissProt	Q8VE80	148	39397	4	4	3	3	0.61	RecName: Full=THO complex subunit 3; Short=Tho3;
340	1	UniProt_SwissProt	Q9JHJ0	145	39592	5	4	5	4	0.61	RecName: Full=Tropomodulin-3; AltName: Full=Ubiquitous tropomodulin; Short=U-Tmod;
217	1	UniProt_SwissProt	Q7TMK9	218	69818	11	8	10	7	0.61	RecName: Full=Heterogeneous nuclear ribonucleoprotein Q; Short=hnRNP Q; AltName: Full=Glycine- and tyrosine-rich RNA-binding protein; Short=GRY-RBP; AltName: Full=NS1-associated protein 1; AltName: Full=Synaptotagmin-binding, cytoplasmic RNA-interacting protein; AltName: Full=pp68;
368	1	UniProt_SwissProt	Q99JF8	134	59774	7	6	7	6	0.61	RecName: Full=PC4 and SFRS1-interacting protein; AltName: Full=Lens epithelium-derived growth factor; Short=mLEDGF;
378	1	UniProt_SwissProt	Q62203	130	49994	5	5	4	4	0.6	RecName: Full=Splicing factor 3A subunit 2; AltName: Full=SF3a66; AltName: Full=Spliceosome-associated protein 62; Short=SAP 62;
515	1	UniProt_SwissProt	Q3THE2	90	19824	4	2	3	2	0.6	RecName: Full=Myosin regulatory light chain 12B; AltName: Full=Myosin regulatory light chain 2-B, smooth muscle isoform; AltName: Full=Myosin regulatory light chain 20 kDa; Short=MLC20; AltName: Full=Myosin regulatory light chain MRLC2;
147	1	UniProt_SwissProt	Q8BWW4	285	80455	13	10	11	8	0.6	RecName: Full=La-related protein 4; AltName: Full=La ribonucleoprotein domain family member 4;
369	1	UniProt_SwissProt	Q99JX7	134	70826	9	7	9	7	0.6	RecName: Full=Nuclear RNA export factor 1; AltName: Full=Tip-associated protein; AltName: Full=Tip-associating protein; AltName: Full=mRNA export factor TAP;
366	1	UniProt_SwissProt	P50136	135	50624	5	5	5	5	0.59	RecName: Full=2-oxoisovalerate dehydrogenase subunit alpha, mitochondrial; EC=1.2.4.4; AltName: Full=Branched-chain alpha-keto acid dehydrogenase E1 component alpha chain; Short=BCKDE1A; Short=BCKDH E1-alpha; Flags: Precursor;
38	6	UniProt_SwissProt	Q3TTY5	142	71336	8	7	6	6	0.59	RecName: Full=Keratin, type II cytoskeletal 2 epidermal; AltName: Full=Cytokeratin-2e; Short=CK-2e; AltName: Full=Epithelial keratin-2e; AltName: Full=Keratin-2 epidermis; AltName: Full=Keratin-2e; Short=K2e; AltName: Full=Type-II keratin Kb2;
258	1	UniProt_SwissProt	P80318	190	61162	7	6	7	6	0.59	RecName: Full=T-complex protein 1 subunit gamma; Short=TCP-1-gamma; AltName: Full=CCT-gamma; AltName: Full=Matricin; AltName: Full=mTRiC-P5;
530	1	UniProt_SwissProt	P28667	87	20210	2	2	2	2	0.59	RecName: Full=MARCKS-related protein; AltName: Full=Brain protein F52; AltName: Full=MARCKS-like protein 1; AltName: Full=Macrophage myristoylated alanine-rich C kinase substrate; Short=Mac-MARCKS; Short=MacMARCKS;
184	1	UniProt_SwissProt	Q810A7	247	102187	13	10	13	10	0.59	RecName: Full=ATP-dependent RNA helicase DDX42; EC=3.6.4.13; AltName: Full=DEAD box protein 42;
341	1	UniProt_SwissProt	Q8CI11	145	61376	7	6	7	6	0.59	RecName: Full=Guanine nucleotide-binding protein-like 3; AltName: Full=Nucleolar GTP-binding protein 3; AltName: Full=Nucleostemin;
243	1	UniProt_SwissProt	Q6A068	199	92361	14	9	14	9	0.59	RecName: Full=Cell division cycle 5-like protein; AltName: Full=Cdc5-like protein;
264	1	UniProt_SwissProt	P97496	186	123326	15	12	15	12	0.58	RecName: Full=SWI/SNF complex subunit SMARCC1; AltName: Full=BRG1-associated factor 155; AltName: Full=SWI/SNF complex 155 kDa subunit; AltName: Full=SWI/SNF-related matrix-associated actin-dependent regulator of chromatin subfamily C member 1; AltName: Full=SWI3-related protein; Short=BAF155;
282	1	UniProt_SwissProt	Q9D3N8	175	41115	4	4	4	4	0.58	RecName: Full=Growth hormone-regulated TBC protein 1; AltName: Full=TBC1 domain family member 6;
423	1	UniProt_SwissProt	O54784	114	51732	7	5	7	5	0.58	RecName: Full=Death-associated protein kinase 3; Short=DAP kinase 3; EC=2.7.11.1; AltName: Full=DAP-like kinase; Short=Dlk; AltName: Full=MYPT1 kinase; AltName: Full=ZIP-kinase;
335	1	UniProt_SwissProt	O35326	147	30987	4	3	4	3	0.58	RecName: Full=Serine/arginine-rich splicing factor 5; AltName: Full=Delayed-early protein HRS; AltName: Full=Pre-mRNA-splicing factor SRP40; AltName: Full=Splicing factor, arginine/serine-rich 5;
195	1	UniProt_SwissProt	Q8BMS1	238	83302	12	8	12	8	0.57	RecName: Full=Trifunctional enzyme subunit alpha, mitochondrial; AltName: Full=TP-alpha; Includes: RecName: Full=Long-chain enoyl-CoA hydratase; EC=4.2.1.17; Includes: RecName: Full=Long chain 3-hydroxyacyl-CoA dehydrogenase; EC=1.1.1.211; Flags: Precursor;
92	1	UniProt_SwissProt	Q8BX22	397	114635	13	13	11	11	0.57	RecName: Full=Sal-like protein 4; AltName: Full=Zinc finger protein SALL4;
857	1	UniProt_SwissProt	Q923D4	41	10170	1	1	1	1	0.57	RecName: Full=Splicing factor 3B subunit 5; Short=SF3b5; AltName: Full=Pre-mRNA-splicing factor SF3b 10 kDa subunit;
639	1	UniProt_SwissProt	Q9JM76	67	20739	3	2	3	2	0.57	RecName: Full=Actin-related protein 2/3 complex subunit 3; AltName: Full=Arp2/3 complex 21 kDa subunit; Short=p21-ARC;
196	1	UniProt_SwissProt	Q8K310	236	95085	11	9	10	8	0.56	RecName: Full=Matrin-3;
934	1	UniProt_SwissProt	O54962	33	10324	1	1	1	1	0.56	RecName: Full=Barrier-to-autointegration factor; AltName: Full=Breakpoint cluster region protein 1; AltName: Full=LAP2-binding protein 1; Contains: RecName: Full=Barrier-to-autointegration factor, N-terminally processed;
462	1	UniProt_SwissProt	P23198	105	21013	3	2	3	2	0.56	RecName: Full=Chromobox protein homolog 3; AltName: Full=Heterochromatin protein 1 homolog gamma; Short=HP1 gamma; AltName: Full=M32; AltName: Full=Modifier 2 protein;
256	1	UniProt_SwissProt	Q80WJ7	195	63922	12	6	11	6	0.56	RecName: Full=Protein LYRIC; AltName: Full=3D3/LYRIC; AltName: Full=Lysine-rich CEACAM1 co-isolated protein; AltName: Full=Metadherin; AltName: Full=Metastasis adhesion protein;
752	1	UniProt_SwissProt	P56135	52	10394	1	1	1	1	0.56	RecName: Full=ATP synthase subunit f, mitochondrial;
164	1	UniProt_SwissProt	Q9Z1X4	264	96360	15	10	13	9	0.56	RecName: Full=Interleukin enhancer-binding factor 3;
249	1	UniProt_SwissProt	Q9EP97	196	64990	7	6	6	6	0.55	RecName: Full=Sentrin-specific protease 3; EC=3.4.22.68; AltName: Full=SUMO-1-specific protease 3; AltName: Full=Sentrin/SUMO-specific protease SENP3; AltName: Full=Smt3-specific isopeptidase 1; Short=Smt3ip1;
315	1	UniProt_SwissProt	Q76KJ5	157	43283	5	5	4	4	0.55	RecName: Full=DNA-directed RNA polymerase I subunit RPA34; AltName: Full=A34.5; AltName: Full=Anti-sense to ERCC-1 protein; Short=ASE-1; AltName: Full=CD3-epsilon-associated protein; Short=CD3E-associated protein; AltName: Full=RNA polymerase I-associated factor PAF49;
381	1	UniProt_SwissProt	P17809	129	54292	7	5	6	5	0.54	RecName: Full=Solute carrier family 2, facilitated glucose transporter member 1; AltName: Full=Glucose transporter type 1, erythrocyte/brain; Short=GLUT-1; Short=GT1;
619	1	UniProt_SwissProt	Q60932	70	32502	4	3	4	3	0.54	RecName: Full=Voltage-dependent anion-selective channel protein 1; Short=VDAC-1; Short=mVDAC1; AltName: Full=Outer mitochondrial membrane protein porin 1; AltName: Full=Plasmalemmal porin; AltName: Full=Voltage-dependent anion-selective channel protein 5; Short=VDAC-5; Short=mVDAC5;
519	1	UniProt_SwissProt	P62075	90	10679	2	1	2	1	0.54	RecName: Full=Mitochondrial import inner membrane translocase subunit Tim13;
388	1	UniProt_SwissProt	Q8BQ30	126	65875	11	6	11	6	0.54	RecName: Full=Phostensin; AltName: Full=Protein phosphatase 1 F-actin cytoskeleton-targeting subunit; AltName: Full=Protein phosphatase 1 regulatory subunit 18;
620	1	UniProt_SwissProt	Q9DB15	70	21809	3	2	3	2	0.54	RecName: Full=39S ribosomal protein L12, mitochondrial; Short=L12mt; Short=MRP-L12; Flags: Precursor;
218	1	UniProt_SwissProt	Q8BU11	215	66376	6	6	6	6	0.53	RecName: Full=TOX high mobility group box family member 4; AltName: Full=Epidermal Langerhans cell protein LCP1;
497	1	UniProt_SwissProt	Q9D0R8	94	21972	3	2	3	2	0.53	RecName: Full=Protein LSM12 homolog;
76	1	UniProt_SwissProt	Q8VDR9	436	235173	25	21	25	21	0.53	RecName: Full=Dedicator of cytokinesis protein 6;
633	1	UniProt_SwissProt	O35900	68	10942	1	1	1	1	0.52	RecName: Full=U6 snRNA-associated Sm-like protein LSm2; AltName: Full=Protein G7b; AltName: Full=snRNP core Sm-like protein Sm-x5;
110	1	UniProt_SwissProt	O08784	364	135035	17	14	14	12	0.52	RecName: Full=Treacle protein; AltName: Full=Treacher Collins syndrome protein homolog;
544	1	UniProt_SwissProt	Q61686	83	22343	2	2	2	2	0.52	RecName: Full=Chromobox protein homolog 5; AltName: Full=Heterochromatin protein 1 homolog alpha; Short=HP1 alpha;
427	1	UniProt_SwissProt	P61161	114	45017	5	4	5	4	0.52	RecName: Full=Actin-related protein 2; AltName: Full=Actin-like protein 2;
744	1	UniProt_SwissProt	P97477	52	45086	4	4	4	4	0.52	RecName: Full=Aurora kinase A; EC=2.7.11.1; AltName: Full=Aurora 2; AltName: Full=Aurora family kinase 1; AltName: Full=Aurora/IPL1-related kinase 1; Short=ARK-1; Short=Aurora-related kinase 1; AltName: Full=Ipl1- and aurora-related kinase 1; AltName: Full=Serine/threonine-protein kinase 6; AltName: Full=Serine/threonine-protein kinase Ayk1; AltName: Full=Serine/threonine-protein kinase aurora-A;
478	1	UniProt_SwissProt	Q9WV69	98	45611	6	4	6	4	0.51	RecName: Full=Dematin; AltName: Full=Dematin actin-binding protein; AltName: Full=Erythrocyte membrane protein band 4.9;
347	1	UniProt_SwissProt	P24788	142	91629	11	8	11	8	0.51	RecName: Full=Cyclin-dependent kinase 11B; AltName: Full=Cell division cycle 2-like protein kinase 1; AltName: Full=Cell division protein kinase 11; AltName: Full=Cyclin-dependent kinase 11; EC=2.7.11.22; AltName: Full=Galactosyltransferase-associated protein kinase p58/GTA; AltName: Full=PITSLRE serine/threonine-protein kinase CDC2L1;
396	2	UniProt_SwissProt	P11440	81	34142	4	3	4	3	0.51	RecName: Full=Cyclin-dependent kinase 1; Short=CDK1; EC=2.7.11.22; EC=2.7.11.23; AltName: Full=Cell division control protein 2 homolog; AltName: Full=Cell division protein kinase 1; AltName: Full=p34 protein kinase;
15	2	UniProt_SwissProt	Q61879	381	229824	29	21	27	20	0.51	RecName: Full=Myosin-10; AltName: Full=Cellular myosin heavy chain, type B; AltName: Full=Myosin heavy chain 10; AltName: Full=Myosin heavy chain, non-muscle IIb; AltName: Full=Non-muscle myosin heavy chain B; Short=NMMHC-B; AltName: Full=Non-muscle myosin heavy chain IIb; Short=NMMHC II-b; Short=NMMHC-IIB;
227	1	UniProt_SwissProt	Q922V4	209	57244	6	5	6	5	0.51	RecName: Full=Pleiotropic regulator 1;
5	3	UniProt_SwissProt	O88990	258	103605	12	9	11	9	0.51	RecName: Full=Alpha-actinin-3; AltName: Full=Alpha-actinin skeletal muscle isoform 3; AltName: Full=F-actin cross-linking protein;
127	1	UniProt_SwissProt	O35134	314	196039	22	17	19	16	0.51	RecName: Full=DNA-directed RNA polymerase I subunit RPA1; Short=RNA polymerase I subunit A1; EC=2.7.7.6; AltName: Full=DNA-directed RNA polymerase I largest subunit; AltName: Full=DNA-directed RNA polymerase I subunit A; AltName: Full=RNA polymerase I 194 kDa subunit; Short=RPA194;
50	1	UniProt_SwissProt	Q61464	549	219196	22	19	21	18	0.51	RecName: Full=Zinc finger protein 638; AltName: Full=Nuclear protein 220; AltName: Full=Zinc finger matrin-like protein;
662	1	UniProt_SwissProt	P48432	63	34489	5	3	5	3	0.5	RecName: Full=Transcription factor SOX-2;
274	1	UniProt_SwissProt	Q8C2Q3	180	69577	8	6	7	6	0.5	RecName: Full=RNA-binding protein 14; AltName: Full=RNA-binding motif protein 14;
409	1	UniProt_SwissProt	Q9DB20	120	23406	4	2	4	2	0.49	RecName: Full=ATP synthase subunit O, mitochondrial; AltName: Full=Oligomycin sensitivity conferral protein; Short=OSCP; Flags: Precursor;
270	1	UniProt_SwissProt	Q8BMA6	181	71044	6	6	6	6	0.49	RecName: Full=Signal recognition particle subunit SRP68; Short=SRP68; AltName: Full=Signal recognition particle 68 kDa protein;
219	2	UniProt_SwissProt	Q91WK0	152	47233	5	4	5	4	0.49	RecName: Full=Leucine-rich repeat flightless-interacting protein 2; Short=LRR FLII-interacting protein 2;
327	1	UniProt_SwissProt	Q8BFQ4	153	35456	8	4	7	3	0.49	RecName: Full=WD repeat-containing protein 82;
169	1	UniProt_SwissProt	Q52KI8	262	106855	15	10	11	7	0.49	RecName: Full=Serine/arginine repetitive matrix protein 1; AltName: Full=Plenty-of-prolines 101;
617	1	UniProt_SwissProt	O88574	70	23559	3	2	3	2	0.49	RecName: Full=Histone deacetylase complex subunit SAP30; AltName: Full=30 kDa Sin3-associated polypeptide; AltName: Full=Sin3 corepressor complex subunit SAP30; AltName: Full=Sin3-associated polypeptide p30;
439	1	UniProt_SwissProt	P31266	110	59241	5	5	5	5	0.49	RecName: Full=Recombining binding protein suppressor of hairless; AltName: Full=J kappa-recombination signal-binding protein; AltName: Full=RBP-J kappa;
566	1	UniProt_SwissProt	Q9JJ80	79	35512	3	3	3	3	0.49	RecName: Full=Ribosome production factor 2 homolog; AltName: Full=Brix domain-containing protein 1; AltName: Full=Ribosome biogenesis protein RPF2 homolog;
765	1	UniProt_SwissProt	Q9JIX0	51	11635	2	1	2	1	0.49	RecName: Full=Transcription and mRNA export factor ENY2; AltName: Full=Enhancer of yellow 2 transcription factor homolog;
143	1	UniProt_SwissProt	Q9DBD5	293	119306	10	10	9	9	0.49	RecName: Full=Proline-, glutamic acid- and leucine-rich protein 1; AltName: Full=Modulator of non-genomic activity of estrogen receptor;
233	1	UniProt_SwissProt	P11499	205	83571	10	7	10	7	0.49	RecName: Full=Heat shock protein HSP 90-beta; AltName: Full=Heat shock 84 kDa; Short=HSP 84; Short=HSP84; AltName: Full=Tumor-specific transplantation 84 kDa antigen; Short=TSTA;
695	1	UniProt_SwissProt	Q9CQQ8	59	11743	1	1	1	1	0.48	RecName: Full=U6 snRNA-associated Sm-like protein LSm7;
215	1	UniProt_SwissProt	Q569Z6	219	108171	13	10	12	9	0.48	RecName: Full=Thyroid hormone receptor-associated protein 3; AltName: Full=Thyroid hormone receptor-associated protein complex 150 kDa component; Short=Trap150;
507	1	UniProt_SwissProt	P16858	92	36072	4	3	4	3	0.48	RecName: Full=Glyceraldehyde-3-phosphate dehydrogenase; Short=GAPDH; EC=1.2.1.12; AltName: Full=Peptidyl-cysteine S-nitrosylase GAPDH; EC=2.6.99.-;
924	1	UniProt_SwissProt	P62311	35	11838	1	1	1	1	0.48	RecName: Full=U6 snRNA-associated Sm-like protein LSm3;
204	3	UniProt_SwissProt	Q9QWL7	110	48417	5	4	5	4	0.48	RecName: Full=Keratin, type I cytoskeletal 17; AltName: Full=Cytokeratin-17; Short=CK-17; AltName: Full=Keratin-17; Short=K17;
70	1	UniProt_SwissProt	Q6PDQ2	459	219096	25	18	20	15	0.48	RecName: Full=Chromodomain-helicase-DNA-binding protein 4; Short=CHD-4; EC=3.6.4.12;
323	1	UniProt_SwissProt	Q60749	155	48511	8	5	7	4	0.48	RecName: Full=KH domain-containing, RNA-binding, signal transduction-associated protein 1; AltName: Full=GAP-associated tyrosine phosphoprotein p62; AltName: Full=Src-associated in mitosis 68 kDa protein; Short=Sam68; AltName: Full=p21 Ras GTPase-activating protein-associated p62; AltName: Full=p68;
108	1	UniProt_SwissProt	Q9QZQ1	365	207340	20	17	19	17	0.47	RecName: Full=Afadin; AltName: Full=Protein Af-6;
464	1	UniProt_SwissProt	Q8BIQ5	104	61416	6	5	6	5	0.47	RecName: Full=Cleavage stimulation factor subunit 2; AltName: Full=CF-1 64 kDa subunit; AltName: Full=Cleavage stimulation factor 64 kDa subunit; Short=CSTF 64 kDa subunit; Short=CstF-64;
421	1	UniProt_SwissProt	Q61539	116	49095	6	5	5	4	0.47	RecName: Full=Steroid hormone receptor ERR2; AltName: Full=Estrogen receptor-like 2; AltName: Full=Estrogen-related receptor beta; Short=ERR-beta; AltName: Full=Nuclear receptor subfamily 3 group B member 2;
601	1	UniProt_SwissProt	Q8BQZ5	74	24436	2	2	2	2	0.47	RecName: Full=Cleavage and polyadenylation specificity factor subunit 4; AltName: Full=Cleavage and polyadenylation specificity factor 30 kDa subunit; Short=CPSF 30 kDa subunit; AltName: Full=Clipper homolog; AltName: Full=Clipper/CPSF 30K;
353	1	UniProt_SwissProt	Q9CSN1	139	61495	5	5	5	5	0.47	RecName: Full=SNW domain-containing protein 1; AltName: Full=Nuclear protein SkiP; AltName: Full=Ski-interacting protein;
459	1	UniProt_SwissProt	O54734	105	49225	4	4	4	4	0.47	RecName: Full=Dolichyl-diphosphooligosaccharide--protein glycosyltransferase 48 kDa subunit; Short=DDOST 48 kDa subunit; Short=Oligosaccharyl transferase 48 kDa subunit; EC=2.4.99.18; Flags: Precursor;
204	5	UniProt_SwissProt	Q61414	103	49278	5	4	4	3	0.47	RecName: Full=Keratin, type I cytoskeletal 15; AltName: Full=Cytokeratin-15; Short=CK-15; AltName: Full=Keratin-15; Short=K15;
572	1	UniProt_SwissProt	P61965	78	37136	3	3	3	3	0.46	RecName: Full=WD repeat-containing protein 5; AltName: Full=BMP2-induced 3-kb gene protein; AltName: Full=WD repeat-containing protein BIG-3;
741	1	UniProt_SwissProt	P47964	53	12265	3	2	2	1	0.46	RecName: Full=60S ribosomal protein L36;
120	1	UniProt_SwissProt	Q62383	330	200159	21	16	20	16	0.46	RecName: Full=Transcription elongation factor SPT6;
777	1	UniProt_SwissProt	Q9WVA3	49	37330	4	3	4	3	0.46	RecName: Full=Mitotic checkpoint protein BUB3; AltName: Full=WD repeat type I transmembrane protein A72.5;
483	1	UniProt_SwissProt	Q4FK66	97	37642	3	3	3	3	0.46	RecName: Full=Pre-mRNA-splicing factor 38A;
290	1	UniProt_SwissProt	Q99MR6	172	100846	10	8	10	8	0.45	RecName: Full=Serrate RNA effector molecule homolog; AltName: Full=Arsenite-resistance protein 2;
296	1	UniProt_SwissProt	Q9R190	170	75724	8	6	8	6	0.45	RecName: Full=Metastasis-associated protein MTA2; AltName: Full=Metastasis-associated 1-like 1;
302	1	UniProt_SwissProt	Q61033	167	75807	7	6	7	6	0.45	RecName: Full=Lamina-associated polypeptide 2, isoforms alpha/zeta; AltName: Full=Thymopoietin isoforms alpha/zeta; Short=TP alpha/zeta;
415	1	UniProt_SwissProt	Q8C854	118	63482	7	5	6	4	0.45	RecName: Full=Myelin expression factor 2; Short=MEF-2; Short=MyEF-2;
316	1	UniProt_SwissProt	O35218	157	89182	9	7	9	7	0.45	RecName: Full=Cleavage and polyadenylation specificity factor subunit 2; AltName: Full=Cleavage and polyadenylation specificity factor 100 kDa subunit; Short=CPSF 100 kDa subunit;
588	1	UniProt_SwissProt	Q9D8X2	75	25330	5	2	5	2	0.45	RecName: Full=Coiled-coil domain-containing protein 124;
61	1	UniProt_SwissProt	P08775	507	218408	26	18	25	17	0.45	RecName: Full=DNA-directed RNA polymerase II subunit RPB1; Short=RNA polymerase II subunit B1; EC=2.7.7.6; AltName: Full=DNA-directed RNA polymerase II subunit A; AltName: Full=DNA-directed RNA polymerase III largest subunit;
472	1	UniProt_SwissProt	Q9D0F6	100	38357	3	3	3	3	0.44	RecName: Full=Replication factor C subunit 5; AltName: Full=Activator 1 36 kDa subunit; Short=A1 36 kDa subunit; AltName: Full=Activator 1 subunit 5; AltName: Full=Replication factor C 36 kDa subunit; Short=RF-C 36 kDa subunit; Short=RFC36;
86	1	UniProt_SwissProt	Q68FD5	407	193202	18	16	17	15	0.44	RecName: Full=Clathrin heavy chain 1;
283	1	UniProt_SwissProt	Q922U1	175	77578	8	6	8	6	0.44	RecName: Full=U4/U6 small nuclear ribonucleoprotein Prp3; AltName: Full=Pre-mRNA-splicing factor 3;
121	1	UniProt_SwissProt	Q80X82	329	143163	13	11	12	11	0.44	RecName: Full=Symplekin;
148	1	UniProt_SwissProt	Q569Z5	283	117889	13	9	12	9	0.44	RecName: Full=Probable ATP-dependent RNA helicase DDX46; EC=3.6.4.13; AltName: Full=DEAD box protein 46;
380	1	UniProt_SwissProt	Q9CWL8	129	65395	7	5	7	5	0.43	RecName: Full=Beta-catenin-like protein 1; AltName: Full=Nuclear-associated protein; Short=NAP;
178	1	UniProt_SwissProt	Q7TSY8	256	131850	13	10	13	10	0.43	RecName: Full=Shugoshin-like 2; AltName: Full=Shugoshin-2; Short=Sgo2;
38	2	UniProt_SwissProt	P04104	249	66079	7	7	5	5	0.43	RecName: Full=Keratin, type II cytoskeletal 1; AltName: Full=67 kDa cytokeratin; AltName: Full=Cytokeratin-1; Short=CK-1; AltName: Full=Keratin-1; Short=K1; AltName: Full=Type-II keratin Kb1;
23	2	UniProt_SwissProt	Q80X90	398	280103	29	21	29	21	0.43	RecName: Full=Filamin-B; Short=FLN-B; AltName: Full=ABP-280-like protein; AltName: Full=Actin-binding-like protein; AltName: Full=Beta-filamin;
771	1	UniProt_SwissProt	Q9CR11	50	26570	2	2	2	2	0.42	RecName: Full=YEATS domain-containing protein 4;
376	1	UniProt_SwissProt	Q9D6R2	132	40069	3	3	3	3	0.42	RecName: Full=Isocitrate dehydrogenase [NAD] subunit alpha, mitochondrial; EC=1.1.1.41; AltName: Full=Isocitric dehydrogenase subunit alpha; AltName: Full=NAD(+)-specific ICDH subunit alpha; Flags: Precursor;
579	1	UniProt_SwissProt	Q9JHS9	77	26665	4	2	4	2	0.42	RecName: Full=Spliceosome-associated protein CWC15 homolog; AltName: Full=Embryonic development factor 1; Short=mED1;
791	1	UniProt_SwissProt	Q9D8Y0	47	26775	2	2	2	2	0.42	RecName: Full=EF-hand domain-containing protein D2; AltName: Full=Swiprosin-1;
641	1	UniProt_SwissProt	Q8R2U0	67	40320	3	3	3	3	0.42	RecName: Full=Nucleoporin SEH1; AltName: Full=Nup107-160 subcomplex subunit SEH1;
319	1	UniProt_SwissProt	Q80W00	156	94655	16	8	14	7	0.42	RecName: Full=Serine/threonine-protein phosphatase 1 regulatory subunit 10; AltName: Full=MHC class I region proline-rich protein CAT53;
257	1	UniProt_SwissProt	Q9DBY8	193	95386	7	7	7	7	0.42	RecName: Full=Nuclear valosin-containing protein-like; Short=NVLp; Short=Nuclear VCP-like protein;
583	1	UniProt_SwissProt	P32233	76	40772	3	3	3	3	0.41	RecName: Full=Developmentally-regulated GTP-binding protein 1; Short=DRG-1; AltName: Full=Neural precursor cell expressed developmentally down-regulated protein 3; Short=NEDD-3;
133	1	UniProt_SwissProt	P59242	309	136593	12	10	12	10	0.41	RecName: Full=Cingulin;
38	7	UniProt_SwissProt	P11679	94	54531	8	4	8	4	0.41	RecName: Full=Keratin, type II cytoskeletal 8; AltName: Full=Cytokeratin endo A; AltName: Full=Cytokeratin-8; Short=CK-8; AltName: Full=Keratin-8; Short=K8; AltName: Full=Type-II keratin Kb8;
458	1	UniProt_SwissProt	Q9DBR1	105	109588	11	8	11	8	0.41	RecName: Full=5'-3' exoribonuclease 2; EC=3.1.13.-; AltName: Full=Protein Dhm1;
212	1	UniProt_SwissProt	Q8BGD9	222	68970	8	6	7	5	0.41	RecName: Full=Eukaryotic translation initiation factor 4B; Short=eIF-4B;
657	1	UniProt_SwissProt	P70279	64	41324	4	3	4	3	0.41	RecName: Full=Surfeit locus protein 6;
491	1	UniProt_SwissProt	Q9CYH6	95	41526	4	3	3	3	0.41	RecName: Full=Ribosome biogenesis regulatory protein homolog;
590	1	UniProt_SwissProt	Q9DCA5	75	41500	4	3	4	3	0.41	RecName: Full=Ribosome biogenesis protein BRX1 homolog; AltName: Full=Brix domain-containing protein 2;
72	1	UniProt_SwissProt	Q3TKT4	443	181827	18	15	15	13	0.4	RecName: Full=Transcription activator BRG1; EC=3.6.4.-; AltName: Full=ATP-dependent helicase SMARCA4; AltName: Full=BRG1-associated factor 190A; Short=BAF190A; AltName: Full=Protein brahma homolog 1; AltName: Full=SNF2-beta; AltName: Full=SWI/SNF-related matrix-associated actin-dependent regulator of chromatin subfamily A member 4;
400	1	UniProt_SwissProt	Q3TYA6	123	98148	9	7	9	7	0.4	RecName: Full=M-phase phosphoprotein 8;
6	2	UniProt_SwissProt	Q64511	227	182707	16	14	14	12	0.4	RecName: Full=DNA topoisomerase 2-beta; EC=5.99.1.3; AltName: Full=DNA topoisomerase II, beta isozyme;
678	2	UniProt_SwissProt	P63101	58	27925	2	2	2	2	0.4	RecName: Full=14-3-3 protein zeta/delta; AltName: Full=Protein kinase C inhibitor protein 1; Short=KCIP-1; AltName: Full=SEZ-2;
357	1	UniProt_SwissProt	Q8BZX4	138	56844	4	4	4	4	0.39	RecName: Full=Splicing regulatory glutamine/lysine-rich protein 1; AltName: Full=Serine/arginine-rich-splicing regulatory protein 86; Short=SRrp86; AltName: Full=Splicing factor, arginine/serine-rich 12;
457	1	UniProt_SwissProt	Q9DCE5	106	42603	5	3	4	3	0.39	RecName: Full=p21-activated protein kinase-interacting protein 1; AltName: Full=PAK1-interacting protein 1; AltName: Full=Putative PAK inhibitor Skb15;
678	1	UniProt_SwissProt	P61982	62	28456	3	2	3	2	0.39	RecName: Full=14-3-3 protein gamma; Contains: RecName: Full=14-3-3 protein gamma, N-terminally processed;
88	2	UniProt_SwissProt	P70700	229	129896	14	10	13	9	0.39	RecName: Full=DNA-directed RNA polymerase I subunit RPA2; Short=RNA polymerase I subunit 2; EC=2.7.7.6; AltName: Full=DNA-directed RNA polymerase I 135 kDa polypeptide; Short=RPA135;
360	1	UniProt_SwissProt	Q99LE6	137	72306	6	5	6	5	0.39	RecName: Full=ATP-binding cassette sub-family F member 2;
177	1	UniProt_SwissProt	Q05920	256	130344	14	9	13	8	0.39	RecName: Full=Pyruvate carboxylase, mitochondrial; EC=6.4.1.1; AltName: Full=Pyruvic carboxylase; Short=PCB; Flags: Precursor;
404	1	UniProt_SwissProt	Q6NZF1	122	87294	10	6	9	6	0.38	RecName: Full=Zinc finger CCCH domain-containing protein 11A;
441	1	UniProt_SwissProt	P80317	109	58424	6	4	6	4	0.38	RecName: Full=T-complex protein 1 subunit zeta; Short=TCP-1-zeta; AltName: Full=CCT-zeta-1;
126	1	UniProt_SwissProt	O88532	315	117926	11	8	11	8	0.38	RecName: Full=Zinc finger RNA-binding protein;
938	1	UniProt_SwissProt	P61219	32	14512	2	1	2	1	0.38	RecName: Full=DNA-directed RNA polymerases I, II, and III subunit RPABC2; Short=RNA polymerases I, II, and III subunit ABC2; AltName: Full=DNA-directed RNA polymerase II subunit F; AltName: Full=RPB6 homolog;
546	1	UniProt_SwissProt	P97376	83	29394	2	2	2	2	0.38	RecName: Full=Protein FRG1; AltName: Full=FSHD region gene 1 protein;
795	1	UniProt_SwissProt	O08579	47	29417	2	2	2	2	0.38	RecName: Full=Emerin;
204	6	UniProt_SwissProt	P19001	97	44515	4	3	4	3	0.37	RecName: Full=Keratin, type I cytoskeletal 19; AltName: Full=Cytokeratin-19; Short=CK-19; AltName: Full=Keratin-19; Short=K19;
356	1	UniProt_SwissProt	Q8K363	138	74476	7	5	7	5	0.37	RecName: Full=ATP-dependent RNA helicase DDX18; EC=3.6.4.13; AltName: Full=DEAD box protein 18;
355	1	UniProt_SwissProt	A2BE28	138	90100	8	6	8	6	0.37	RecName: Full=Ribosomal biogenesis protein LAS1L; AltName: Full=Protein LAS1 homolog;
686	1	UniProt_SwissProt	Q9CQA5	60	29820	3	2	3	2	0.37	RecName: Full=Mediator of RNA polymerase II transcription subunit 4; AltName: Full=Mediator complex subunit 4;
287	1	UniProt_SwissProt	O35144	172	60397	5	4	4	3	0.37	RecName: Full=Telomeric repeat-binding factor 2; AltName: Full=TTAGGG repeat-binding factor 2; AltName: Full=Telomeric DNA-binding protein;
246	1	UniProt_SwissProt	Q3URQ0	198	105941	9	7	9	7	0.37	RecName: Full=Testis-expressed sequence 10 protein;
576	1	UniProt_SwissProt	Q99LB2	78	30094	3	2	3	2	0.37	RecName: Full=Dehydrogenase/reductase SDR family member 4; EC=1.1.1.184; AltName: Full=NADPH-dependent carbonyl reductase/NADP-retinol dehydrogenase; Short=CR; Short=PHCR; AltName: Full=NADPH-dependent retinol dehydrogenase/reductase; Short=NDRD; Short=mouNRDR; AltName: Full=Peroxisomal short-chain alcohol dehydrogenase; Short=PSCD;
174	1	UniProt_SwissProt	Q9Z315	260	91001	10	7	9	6	0.37	RecName: Full=U4/U6.U5 tri-snRNP-associated protein 1; AltName: Full=Hypoxia-associated factor; AltName: Full=Squamous cell carcinoma antigen recognized by T-cells 1; Short=SART-1; Short=mSART-1;
38	4	UniProt_SwissProt	Q6IFZ6	170	61379	5	5	4	4	0.36	RecName: Full=Keratin, type II cytoskeletal 1b; AltName: Full=Cytokeratin-1B; Short=CK-1B; AltName: Full=Embryonic type II keratin-1; AltName: Full=Keratin-77; Short=K77; AltName: Full=Type-II keratin Kb39;
844	1	UniProt_SwissProt	P97304	42	15291	1	1	1	1	0.36	RecName: Full=DNA-directed RNA polymerases I and III subunit RPAC2; Short=RNA polymerases I and III subunit AC2; AltName: Full=AC19; AltName: Full=DNA-directed RNA polymerase I subunit D; AltName: Full=RNA polymerase I 16 kDa subunit; Short=RPA16;
300	1	UniProt_SwissProt	Q60865	169	78292	6	5	6	5	0.35	RecName: Full=Caprin-1; AltName: Full=Cytoplasmic activation- and proliferation-associated protein 1; AltName: Full=GPI-anchored membrane protein 1; AltName: Full=GPI-anchored protein p137; Short=GPI-p137; Short=p137GPI; AltName: Full=Membrane component chromosome 11 surface marker 1; AltName: Full=RNA granule protein 105;
715	1	UniProt_SwissProt	Q9D945	56	15495	1	1	1	1	0.35	RecName: Full=Protein LLP homolog; AltName: Full=Protein LAPS18-like;
518	1	UniProt_SwissProt	Q8BKT7	90	79377	8	6	7	5	0.35	RecName: Full=THO complex subunit 5 homolog; AltName: Full=Fms-interacting protein;
627	1	UniProt_SwissProt	Q9DC28	69	47571	3	3	3	3	0.35	RecName: Full=Casein kinase I isoform delta; Short=CKI-delta; Short=CKId; EC=2.7.11.1; AltName: Full=Tau-protein kinase CSNK1D; EC=2.7.11.26;
351	1	UniProt_SwissProt	Q60848	140	95806	9	6	9	6	0.34	RecName: Full=Lymphocyte-specific helicase; EC=3.6.4.-; AltName: Full=Proliferation-associated SNF2-like protein;
171	1	UniProt_SwissProt	Q6P5B0	260	144295	16	11	14	9	0.34	RecName: Full=RRP12-like protein;
430	1	UniProt_SwissProt	P28740	113	80391	5	5	5	5	0.34	RecName: Full=Kinesin-like protein KIF2A; AltName: Full=Kinesin-2;
976	1	UniProt_SwissProt	P02088	25	15944	1	1	1	1	0.34	RecName: Full=Hemoglobin subunit beta-1; AltName: Full=Beta-1-globin; AltName: Full=Hemoglobin beta-1 chain; AltName: Full=Hemoglobin beta-major chain;
496	1	UniProt_SwissProt	Q9CXU1	94	15932	1	1	1	1	0.34	RecName: Full=Mediator of RNA polymerase II transcription subunit 31; AltName: Full=Mediator complex subunit 31; AltName: Full=Mediator complex subunit SOH1;
405	1	UniProt_SwissProt	Q91YK2	122	81273	7	5	7	5	0.34	RecName: Full=Ribosomal RNA processing protein 1 homolog B; AltName: Full=RRP1-like protein B;
467	1	UniProt_SwissProt	Q9D2G2	103	49306	3	3	3	3	0.33	RecName: Full=Dihydrolipoyllysine-residue succinyltransferase component of 2-oxoglutarate dehydrogenase complex, mitochondrial; EC=2.3.1.61; AltName: Full=2-oxoglutarate dehydrogenase complex component E2; Short=OGDC-E2; AltName: Full=Dihydrolipoamide succinyltransferase component of 2-oxoglutarate dehydrogenase complex; AltName: Full=E2K; Flags: Precursor;
91	1	UniProt_SwissProt	Q69ZR9	399	183050	12	12	11	11	0.33	RecName: Full=Protein FAM208A;
709	1	UniProt_SwissProt	O88445	56	33171	2	2	2	2	0.33	RecName: Full=Aurora kinase C; EC=2.7.11.1; AltName: Full=Aurora 3; AltName: Full=Aurora/IPL1-related kinase 3; Short=ARK-3; Short=Aurora-related kinase 3; AltName: Full=Aurora/IPL1/Eg2 protein 1; AltName: Full=Serine/threonine-protein kinase 13; AltName: Full=Serine/threonine-protein kinase aurora-C;
322	1	UniProt_SwissProt	Q9JIH2	155	49911	5	3	5	3	0.33	RecName: Full=Nuclear pore complex protein Nup50; AltName: Full=50 kDa nucleoporin; AltName: Full=Nuclear pore-associated protein 60 kDa-like; AltName: Full=Nucleoporin Nup50;
326	1	UniProt_SwissProt	Q91VR5	153	83474	6	6	5	5	0.33	RecName: Full=ATP-dependent RNA helicase DDX1; EC=3.6.4.13; AltName: Full=DEAD box protein 1;
428	1	UniProt_SwissProt	P14733	114	66973	8	4	8	4	0.33	RecName: Full=Lamin-B1; Flags: Precursor;
399	1	UniProt_SwissProt	Q9D8N0	123	50371	5	3	5	3	0.32	RecName: Full=Elongation factor 1-gamma; Short=EF-1-gamma; AltName: Full=eEF-1B gamma;
413	1	UniProt_SwissProt	Q8CGY8	119	118131	9	7	9	7	0.32	RecName: Full=UDP-N-acetylglucosamine--peptide N-acetylglucosaminyltransferase 110 kDa subunit; EC=2.4.1.255; AltName: Full=O-GlcNAc transferase subunit p110; AltName: Full=O-linked N-acetylglucosamine transferase 110 kDa subunit; Short=OGT;
279	1	UniProt_SwissProt	Q91VX2	179	118293	7	7	7	7	0.32	RecName: Full=Ubiquitin-associated protein 2; Short=UBAP-2; AltName: Full=Protein lingerer homolog 1; Short=mLig-1;
438	1	UniProt_SwissProt	Q8CHY6	111	67634	5	4	5	4	0.32	RecName: Full=Transcriptional repressor p66 alpha; AltName: Full=GATA zinc finger domain-containing protein 2A;
440	1	UniProt_SwissProt	Q9JLZ6	110	67694	5	4	5	4	0.32	RecName: Full=Hypermethylated in cancer 2 protein; Short=Hic-2;
276	2	UniProt_SwissProt	Q9Z130	42	33709	3	2	3	2	0.32	RecName: Full=Heterogeneous nuclear ribonucleoprotein D-like; Short=hnRNP D-like; Short=hnRNP DL; AltName: Full=JKT41-binding protein;
568	1	UniProt_SwissProt	Q9CWX9	79	50949	5	3	5	3	0.32	RecName: Full=Probable ATP-dependent RNA helicase DDX47; EC=3.6.4.13; AltName: Full=DEAD box protein 47;
610	1	UniProt_SwissProt	Q9ERF3	73	33923	2	2	2	2	0.32	RecName: Full=WD repeat-containing protein 61; AltName: Full=Meiotic recombination REC14 protein homolog;
706	1	UniProt_SwissProt	Q922Q4	57	33980	3	2	3	2	0.32	RecName: Full=Pyrroline-5-carboxylate reductase 2; Short=P5C reductase 2; Short=P5CR 2; EC=1.5.1.2;
707	1	UniProt_SwissProt	Q78XF5	57	16918	1	1	1	1	0.32	RecName: Full=Oligosaccharyltransferase complex subunit OSTC;
408	1	UniProt_SwissProt	Q91YQ5	121	68657	4	4	4	4	0.32	RecName: Full=Dolichyl-diphosphooligosaccharide--protein glycosyltransferase subunit 1; EC=2.4.99.18; AltName: Full=Dolichyl-diphosphooligosaccharide--protein glycosyltransferase 67 kDa subunit; AltName: Full=Ribophorin I; Short=RPN-I; AltName: Full=Ribophorin-1; Flags: Precursor;
402	1	UniProt_SwissProt	Q02248	122	86043	9	5	9	5	0.32	RecName: Full=Catenin beta-1; AltName: Full=Beta-catenin;
676	1	UniProt_SwissProt	Q9D898	62	17027	1	1	1	1	0.32	RecName: Full=Actin-related protein 2/3 complex subunit 5-like protein; AltName: Full=Arp2/3 complex 16 kDa subunit 2; Short=ARC16-2;
453	1	UniProt_SwissProt	Q8K3G5	106	51596	3	3	3	3	0.32	RecName: Full=Inactive serine/threonine-protein kinase VRK3; AltName: Full=Serine/threonine-protein pseudokinase VRK3; AltName: Full=Vaccinia-related kinase 3;
343	1	UniProt_SwissProt	Q1HFZ0	143	86252	7	5	7	5	0.32	RecName: Full=tRNA (cytosine(34)-C(5))-methyltransferase; EC=2.1.1.203; AltName: Full=Myc-induced SUN domain-containing protein; Short=Misu; AltName: Full=NOL1/NOP2/Sun domain family member 2;
909	1	UniProt_SwissProt	Q8BGY2	36	17124	1	1	1	1	0.31	RecName: Full=Eukaryotic translation initiation factor 5A-2; Short=eIF-5A-2; Short=eIF-5A2; AltName: Full=Eukaryotic initiation factor 5A isoform 2;
204	4	UniProt_SwissProt	Q9Z2K1	103	51973	4	3	3	2	0.31	RecName: Full=Keratin, type I cytoskeletal 16; AltName: Full=Cytokeratin-16; Short=CK-16; AltName: Full=Keratin-16; Short=K16;
67	1	UniProt_SwissProt	G5E870	468	226097	20	14	19	13	0.31	RecName: Full=E3 ubiquitin-protein ligase TRIP12; EC=6.3.2.-; AltName: Full=Thyroid receptor-interacting protein 12; Short=TR-interacting protein 12; Short=TRIP-12;
551	1	UniProt_SwissProt	Q8BTV2	81	52150	4	3	4	3	0.31	RecName: Full=Cleavage and polyadenylation specificity factor subunit 7;
559	1	UniProt_SwissProt	P17897	80	17240	1	1	1	1	0.31	RecName: Full=Lysozyme C-1; EC=3.2.1.17; AltName: Full=1,4-beta-N-acetylmuramidase C; AltName: Full=Lysozyme C type P; Flags: Precursor;
390	1	UniProt_SwissProt	P52479	126	87652	8	5	8	5	0.31	RecName: Full=Ubiquitin carboxyl-terminal hydrolase 10; EC=3.4.19.12; AltName: Full=Deubiquitinating enzyme 10; AltName: Full=Ubiquitin thioesterase 10; AltName: Full=Ubiquitin-specific-processing protease 10;
531	1	UniProt_SwissProt	Q8C5N3	86	105337	9	6	8	6	0.31	RecName: Full=Pre-mRNA-splicing factor CWC22 homolog; AltName: Full=Nucampholin homolog;
320	1	UniProt_SwissProt	Q0P678	156	105859	9	6	8	6	0.31	RecName: Full=Zinc finger CCCH domain-containing protein 18; AltName: Full=Nuclear protein NHN1;
134	1	UniProt_SwissProt	Q61191	307	212188	18	13	15	11	0.31	RecName: Full=Host cell factor 1; Short=HCF; Short=HCF-1; AltName: Full=C1 factor; Contains: RecName: Full=HCF N-terminal chain 1; Contains: RecName: Full=HCF N-terminal chain 2; Contains: RecName: Full=HCF N-terminal chain 3; Contains: RecName: Full=HCF N-terminal chain 4; Contains: RecName: Full=HCF N-terminal chain 5; Contains: RecName: Full=HCF N-terminal chain 6; Contains: RecName: Full=HCF …
325	1	UniProt_SwissProt	Q64213	154	70814	5	5	4	4	0.31	RecName: Full=Splicing factor 1; AltName: Full=CW17; AltName: Full=Mammalian branch point-binding protein; Short=BBP; Short=mBBP; AltName: Full=Transcription factor ZFM1; Short=mZFM; AltName: Full=Zinc finger gene in MEN1 locus; AltName: Full=Zinc finger protein 162;
333	1	UniProt_SwissProt	Q6P9R1	149	70837	4	4	4	4	0.31	RecName: Full=ATP-dependent RNA helicase DDX51; EC=3.6.4.13; AltName: Full=DEAD box protein 51;
433	1	UniProt_SwissProt	Q8R3C6	112	106474	7	6	7	6	0.31	RecName: Full=Probable RNA-binding protein 19; AltName: Full=RNA-binding motif protein 19;
129	2	UniProt_SwissProt	Q99K43	111	70930	8	4	8	4	0.31	RecName: Full=Protein regulator of cytokinesis 1;
192	1	UniProt_SwissProt	Q2KN98	240	124811	9	8	8	7	0.3	RecName: Full=Cytospin-A; AltName: Full=SPECC1-like protein; AltName: Full=Sperm antigen with calponin homology and coiled-coil domains 1-like;
384	1	UniProt_SwissProt	O35682	128	36003	2	2	2	2	0.3	RecName: Full=Myeloid-associated differentiation marker; AltName: Full=Myeloid up-regulated protein;
723	1	UniProt_SwissProt	Q9CQ22	55	17852	1	1	1	1	0.3	RecName: Full=Ragulator complex protein LAMTOR1; AltName: Full=Late endosomal/lysosomal adaptor and MAPK and MTOR activator 1; AltName: Full=Lipid raft adaptor protein p18;
189	1	UniProt_SwissProt	Q9JJ28	241	146137	9	8	9	8	0.3	RecName: Full=Protein flightless-1 homolog;
580	1	UniProt_SwissProt	Q4FZF3	76	54744	3	3	3	3	0.3	RecName: Full=Probable ATP-dependent RNA helicase DDX49; EC=3.6.4.13; AltName: Full=DEAD box protein 49;
645	1	UniProt_SwissProt	Q61382	67	55179	3	3	3	3	0.29	RecName: Full=TNF receptor-associated factor 4; AltName: Full=Cysteine-rich motif associated to RING and Traf domains protein 1;
904	1	UniProt_SwissProt	P28574	37	18186	1	1	1	1	0.29	RecName: Full=Protein max; AltName: Full=Myc-associated factor X; AltName: Full=Myc-binding novel HLH/LZ protein; AltName: Full=Protein myn;
426	1	UniProt_SwissProt	Q3UM18	114	73852	5	4	5	4	0.29	RecName: Full=Large subunit GTPase 1 homolog; EC=3.6.1.-;
338	1	UniProt_SwissProt	Q3TJZ6	146	55477	3	3	3	3	0.29	RecName: Full=Protein FAM98A;
367	1	UniProt_SwissProt	Q91YE7	135	92767	6	5	6	5	0.29	RecName: Full=RNA-binding protein 5; AltName: Full=Putative tumor suppressor LUCA15; AltName: Full=RNA-binding motif protein 5;
782	1	UniProt_SwissProt	Q78WZ7	49	37212	2	2	2	2	0.29	RecName: Full=DNA-directed RNA polymerase I subunit RPA43; AltName: Full=Twist neighbor protein;
335	2	UniProt_SwissProt	Q8VE97	143	56061	4	3	4	3	0.29	RecName: Full=Serine/arginine-rich splicing factor 4; AltName: Full=Splicing factor, arginine/serine-rich 4;
540	1	UniProt_SwissProt	Q5XJE5	84	75666	4	4	4	4	0.28	RecName: Full=RNA polymerase-associated protein LEO1;
552	1	UniProt_SwissProt	Q9CWK3	81	37785	3	2	3	2	0.28	RecName: Full=CD2 antigen cytoplasmic tail-binding protein 2; Short=CD2 cytoplasmic domain-binding protein 2; Short=CD2 tail-binding protein 2;
461	1	UniProt_SwissProt	Q61235	105	56802	3	3	3	3	0.28	RecName: Full=Beta-2-syntrophin; AltName: Full=59 kDa dystrophin-associated protein A1 basic component 2; AltName: Full=Syntrophin-3; Short=SNT3; AltName: Full=Syntrophin-like; Short=SNTL;
736	1	UniProt_SwissProt	P18760	53	18776	1	1	1	1	0.28	RecName: Full=Cofilin-1; AltName: Full=Cofilin, non-muscle isoform;
397	1	UniProt_SwissProt	Q8R3N6	124	76130	4	4	4	4	0.28	RecName: Full=THO complex subunit 1; Short=Tho1; AltName: Full=Nuclear matrix protein p84;
603	1	UniProt_SwissProt	Q5U4D9	74	37918	2	2	2	2	0.28	RecName: Full=THO complex subunit 6 homolog; AltName: Full=WD repeat-containing protein 58;
377	1	UniProt_SwissProt	Q6P542	131	95343	7	5	7	5	0.28	RecName: Full=ATP-binding cassette sub-family F member 1;
90	1	UniProt_SwissProt	Q8C9B9	400	248621	13	13	13	13	0.28	RecName: Full=Death-inducer obliterator 1; Short=DIO-1; AltName: Full=Death-associated transcription factor 1; Short=DATF-1;
190	1	UniProt_SwissProt	Q62018	241	134181	10	8	9	7	0.28	RecName: Full=RNA polymerase-associated protein CTR9 homolog; AltName: Full=SH2 domain-binding protein 1; AltName: Full=Tetratricopeptide repeat-containing, SH2-binding phosphoprotein of 150 kDa; Short=TPR-containing, SH2-binding phosphoprotein of 150 kDa; Short=p150TSP;
616	1	UniProt_SwissProt	P62874	70	38151	2	2	2	2	0.28	RecName: Full=Guanine nucleotide-binding protein G(I)/G(S)/G(T) subunit beta-1; AltName: Full=Transducin beta chain 1;
38	5	UniProt_SwissProt	Q8VED5	143	57802	5	4	4	3	0.28	RecName: Full=Keratin, type II cytoskeletal 79; AltName: Full=Cytokeratin-79; Short=CK-79; AltName: Full=Keratin-79; Short=K79; AltName: Full=Type-II keratin Kb38;
594	1	UniProt_SwissProt	P80314	75	57783	3	3	3	3	0.28	RecName: Full=T-complex protein 1 subunit beta; Short=TCP-1-beta; AltName: Full=CCT-beta;
484	1	UniProt_SwissProt	Q9CZA6	96	38556	2	2	2	2	0.28	RecName: Full=Nuclear distribution protein nudE homolog 1; Short=NudE; Short=mNudE;
523	1	UniProt_SwissProt	Q99JB2	89	38475	2	2	2	2	0.28	RecName: Full=Stomatin-like protein 2, mitochondrial; Short=SLP-2; Short=mslp2; Flags: Precursor;
436	1	UniProt_SwissProt	O35344	112	58193	3	3	3	3	0.28	RecName: Full=Importin subunit alpha-4; AltName: Full=Importin alpha Q2; Short=Qip2; AltName: Full=Karyopherin subunit alpha-3;
294	1	UniProt_SwissProt	Q80U72	171	175150	11	9	10	9	0.28	RecName: Full=Protein scribble homolog; Short=Scribble; AltName: Full=Protein LAP4;
481	1	UniProt_SwissProt	Q61466	97	58493	3	3	3	3	0.27	RecName: Full=SWI/SNF-related matrix-associated actin-dependent regulator of chromatin subfamily D member 1; AltName: Full=60 kDa BRG-1/Brm-associated factor subunit A; AltName: Full=BRG1-associated factor 60A; Short=BAF60A; AltName: Full=Protein D15KZ1; AltName: Full=SWI/SNF complex 60 kDa subunit;
766	1	UniProt_SwissProt	Q9CPP0	51	19353	1	1	1	1	0.27	RecName: Full=Nucleoplasmin-3;
600	1	UniProt_SwissProt	Q8R2Q8	74	19311	1	1	1	1	0.27	RecName: Full=Bone marrow stromal antigen 2; Short=BST-2; AltName: Full=HM1.24 antigen; AltName: CD_antigen=CD317; Flags: Precursor;
285	1	UniProt_SwissProt	Q9CZU3	173	118588	9	6	9	6	0.27	RecName: Full=Superkiller viralicidic activity 2-like 2; EC=3.6.4.13; AltName: Full=ATP-dependent helicase SKIV2L2;
301	1	UniProt_SwissProt	Q91ZW3	168	122291	8	6	8	6	0.26	RecName: Full=SWI/SNF-related matrix-associated actin-dependent regulator of chromatin subfamily A member 5; EC=3.6.4.-; AltName: Full=Sucrose nonfermenting protein 2 homolog; Short=mSnf2h;
569	1	UniProt_SwissProt	Q9D0R4	79	61573	4	3	4	3	0.26	RecName: Full=Probable ATP-dependent RNA helicase DDX56; EC=3.6.4.13; AltName: Full=ATP-dependent 61 kDa nucleolar RNA helicase; AltName: Full=DEAD box protein 56;
445	1	UniProt_SwissProt	P08752	108	41033	4	2	4	2	0.26	RecName: Full=Guanine nucleotide-binding protein G(i) subunit alpha-2; AltName: Full=Adenylate cyclase-inhibiting G alpha protein;
803	1	UniProt_SwissProt	Q8VE22	46	20393	1	1	1	1	0.26	RecName: Full=28S ribosomal protein S23, mitochondrial; Short=MRP-S23; Short=S23mt;
331	1	UniProt_SwissProt	Q8R323	150	41241	2	2	2	2	0.26	RecName: Full=Replication factor C subunit 3; AltName: Full=Activator 1 38 kDa subunit; Short=A1 38 kDa subunit; AltName: Full=Activator 1 subunit 3; AltName: Full=Replication factor C 38 kDa subunit; Short=RF-C 38 kDa subunit; Short=RFC38;
238	1	UniProt_SwissProt	Q99KG3	201	103773	8	5	7	5	0.26	RecName: Full=RNA-binding protein 10; AltName: Full=RNA-binding motif protein 10;
450	1	UniProt_SwissProt	Q8K2A7	107	83107	5	4	5	4	0.26	RecName: Full=Integrator complex subunit 10; Short=Int10;
449	1	UniProt_SwissProt	Q99LI7	107	83280	7	4	7	4	0.25	RecName: Full=Cleavage stimulation factor subunit 3; AltName: Full=CF-1 77 kDa subunit; AltName: Full=Cleavage stimulation factor 77 kDa subunit; Short=CSTF 77 kDa subunit; Short=CstF-77;
694	1	UniProt_SwissProt	Q8C570	59	41566	3	2	3	2	0.25	RecName: Full=mRNA export factor; AltName: Full=Rae1 protein homolog; AltName: Full=mRNA-associated protein mrnp 41;
493	1	UniProt_SwissProt	Q8C5L7	94	41472	3	2	3	2	0.25	RecName: Full=RNA-binding protein 34; AltName: Full=RNA-binding motif protein 34;
721	1	UniProt_SwissProt	Q9D868	55	20735	1	1	1	1	0.25	RecName: Full=Peptidyl-prolyl cis-trans isomerase H; Short=PPIase H; EC=5.2.1.8; AltName: Full=Rotamase H;
372	1	UniProt_SwissProt	Q9WV32	133	41836	3	2	3	2	0.25	RecName: Full=Actin-related protein 2/3 complex subunit 1B; AltName: Full=Arp2/3 complex 41 kDa subunit; AltName: Full=p41-ARC;
248	1	UniProt_SwissProt	P35601	196	126705	8	6	8	6	0.25	RecName: Full=Replication factor C subunit 1; AltName: Full=A1-P145; AltName: Full=Activator 1 140 kDa subunit; Short=A1 140 kDa subunit; AltName: Full=Activator 1 large subunit; AltName: Full=Activator 1 subunit 1; AltName: Full=Differentiation-specific element-binding protein; AltName: Full=ISRE-binding protein; AltName: Full=Replication factor C 140 kDa subunit; Short=RF-C 140 kDa subunit; Sho…
312	1	UniProt_SwissProt	D3YXK2	159	105553	10	5	8	4	0.25	RecName: Full=Scaffold attachment factor B1; Short=SAF-B1;
38	8	UniProt_SwissProt	Q3UV17	76	63319	5	3	5	3	0.25	RecName: Full=Keratin, type II cytoskeletal 2 oral; AltName: Full=Keratin-76; Short=K76; AltName: Full=Type-II keratin Kb9;
604	1	UniProt_SwissProt	Q9DCF9	73	21051	1	1	1	1	0.25	RecName: Full=Translocon-associated protein subunit gamma; Short=TRAP-gamma; AltName: Full=Signal sequence receptor subunit gamma; Short=SSR-gamma;
454	1	UniProt_SwissProt	P59235	106	42533	2	2	2	2	0.25	RecName: Full=Nucleoporin Nup43; AltName: Full=Nup107-160 subcomplex subunit Nup43;
490	1	UniProt_SwissProt	Q8BYK6	95	64036	5	4	4	3	0.25	RecName: Full=YTH domain family protein 3;
737	1	UniProt_SwissProt	Q9D9N8	53	21357	1	1	1	1	0.25	RecName: Full=Protease-associated domain-containing protein 1; AltName: Full=Protease-associated domain-containing protein of 21 kDa; Flags: Precursor;
396	3	UniProt_SwissProt	Q99J95	80	43133	4	2	4	2	0.24	RecName: Full=Cyclin-dependent kinase 9; EC=2.7.11.22; EC=2.7.11.23; AltName: Full=Cell division protein kinase 9;
975	1	UniProt_SwissProt	P60766	26	21587	1	1	1	1	0.24	RecName: Full=Cell division control protein 42 homolog; AltName: Full=G25K GTP-binding protein; Flags: Precursor;
468	1	UniProt_SwissProt	Q05CL8	102	65218	3	3	3	3	0.24	RecName: Full=La-related protein 7; AltName: Full=La ribonucleoprotein domain family member 7;
586	1	UniProt_SwissProt	Q8VHR5	75	65712	3	3	3	3	0.24	RecName: Full=Transcriptional repressor p66-beta; AltName: Full=GATA zinc finger domain-containing protein 2B; AltName: Full=p66/p68;
464	2	UniProt_SwissProt	Q8C7E9	92	66048	3	3	3	3	0.24	RecName: Full=Cleavage stimulation factor subunit 2 tau variant; AltName: Full=CF-1 64 kDa subunit tau variant; AltName: Full=Cleavage stimulation factor 64 kDa subunit tau variant; Short=CSTF 64 kDa subunit tau variant; AltName: Full=TauCstF-64;
191	1	UniProt_SwissProt	Q6PGC1	241	155020	10	7	10	7	0.24	RecName: Full=ATP-dependent RNA helicase Dhx29; EC=3.6.4.13; AltName: Full=DEAH box protein 29;
254	1	UniProt_SwissProt	Q6NXI6	195	157003	8	7	8	7	0.24	RecName: Full=Regulation of nuclear pre-mRNA domain-containing protein 2;
373	1	UniProt_SwissProt	Q6R891	132	89580	7	4	7	4	0.24	RecName: Full=Neurabin-2; AltName: Full=Neurabin-II; AltName: Full=Protein phosphatase 1 regulatory subunit 9B; AltName: Full=Spinophilin;
689	1	UniProt_SwissProt	Q9CXL3	60	22155	1	1	1	1	0.23	RecName: Full=Uncharacterized protein C7orf50 homolog;
179	1	UniProt_SwissProt	A2AIV2	252	203023	12	9	12	9	0.23	RecName: Full=Protein virilizer homolog;
930	1	UniProt_SwissProt	Q9D0B8	33	45106	4	2	2	1	0.23	RecName: Full=RIB43A-like with coiled-coils protein 1;
891	1	UniProt_SwissProt	Q62276	38	22439	1	1	1	1	0.23	RecName: Full=Mediator of RNA polymerase II transcription subunit 22; AltName: Full=Mediator complex subunit 22; AltName: Full=Surfeit locus protein 5; Short=Surf-5;
473	1	UniProt_SwissProt	Q60737	100	45219	3	3	2	2	0.23	RecName: Full=Casein kinase II subunit alpha; Short=CK II alpha; EC=2.7.11.1;
690	1	UniProt_SwissProt	Q00899	60	45145	3	2	3	2	0.23	RecName: Full=Transcriptional repressor protein YY1; AltName: Full=Delta transcription factor; AltName: Full=NF-E1; AltName: Full=UCR-motif DNA-binding protein; AltName: Full=Yin and yang 1; Short=YY-1;
275	1	UniProt_SwissProt	Q8VDN2	180	114221	6	5	6	5	0.23	RecName: Full=Sodium/potassium-transporting ATPase subunit alpha-1; Short=Na(+)/K(+) ATPase alpha-1 subunit; EC=3.6.3.9; AltName: Full=Sodium pump subunit alpha-1; Flags: Precursor;
781	1	UniProt_SwissProt	Q9DAT2	49	22593	1	1	1	1	0.23	RecName: Full=MRG/MORF4L-binding protein; AltName: Full=MRG-binding protein;
618	1	UniProt_SwissProt	P28656	70	45602	2	2	2	2	0.23	RecName: Full=Nucleosome assembly protein 1-like 1; AltName: Full=Brain protein DN38; AltName: Full=NAP-1-related protein; Flags: Precursor;
725	1	UniProt_SwissProt	P63037	55	45581	2	2	2	2	0.23	RecName: Full=DnaJ homolog subfamily A member 1; AltName: Full=DnaJ protein homolog 2; AltName: Full=Heat shock 40 kDa protein 4; AltName: Full=Heat shock protein J2; Short=HSJ-2; Flags: Precursor;
435	1	UniProt_SwissProt	Q99PU8	112	137723	8	6	8	6	0.23	RecName: Full=Putative ATP-dependent RNA helicase DHX30; EC=3.6.4.13; AltName: Full=DEAH box protein 30;
929	1	UniProt_SwissProt	Q9R0Q3	33	22804	1	1	1	1	0.23	RecName: Full=Transmembrane emp24 domain-containing protein 2; AltName: Full=COPI-coated vesicle membrane protein p24; AltName: Full=Membrane protein p24A; AltName: Full=Sid 394; AltName: Full=p24 family protein beta-1; Short=p24beta1; Flags: Precursor;
642	1	UniProt_SwissProt	Q8BW10	67	45834	2	2	2	2	0.23	RecName: Full=RNA-binding protein NOB1;
206	1	UniProt_SwissProt	B1AZI6	229	184540	11	8	11	8	0.23	RecName: Full=THO complex subunit 2; Short=Tho2;
155	3	UniProt_SwissProt	P35922	87	69232	3	3	3	3	0.23	RecName: Full=Fragile X mental retardation protein 1 homolog; Short=FMRP; Short=Protein FMR-1; Short=mFmr1p;
307	1	UniProt_SwissProt	Q5SWD9	164	92503	4	4	4	4	0.23	RecName: Full=Pre-rRNA-processing protein TSR1 homolog;
835	1	UniProt_SwissProt	A2A6Q5	42	92868	5	4	5	4	0.23	RecName: Full=Cell division cycle protein 27 homolog;
512	1	UniProt_SwissProt	Q6ZQ88	91	93306	4	4	4	4	0.22	RecName: Full=Lysine-specific histone demethylase 1A; EC=1.-.-.-; AltName: Full=BRAF35-HDAC complex protein BHC110; AltName: Full=Flavin-containing amine oxidase domain-containing protein 2;
359	1	UniProt_SwissProt	Q8CH25	137	117078	10	5	10	5	0.22	RecName: Full=SAFB-like transcription modulator; AltName: Full=Modulator of estrogen-induced transcription; AltName: Full=SAF-like transcription modulator;
860	1	UniProt_SwissProt	Q9CYD3	40	46767	3	2	3	2	0.22	RecName: Full=Cartilage-associated protein; Flags: Precursor;
545	1	UniProt_SwissProt	Q8BMC4	83	70858	5	3	5	3	0.22	RecName: Full=Nucleolar protein 9; AltName: Full=Pumilio domain-containing protein NOP9;
719	1	UniProt_SwissProt	Q99JY9	55	47783	2	2	2	2	0.22	RecName: Full=Actin-related protein 3; AltName: Full=Actin-like protein 3;
479	1	UniProt_SwissProt	Q9Z1N2	98	95956	5	4	5	4	0.22	RecName: Full=Origin recognition complex subunit 1;
850	1	UniProt_SwissProt	P55258	41	23824	2	1	2	1	0.22	RecName: Full=Ras-related protein Rab-8A; AltName: Full=Oncogene c-mel; Flags: Precursor;
870	1	UniProt_SwissProt	Q7TMY4	40	23928	1	1	1	1	0.22	RecName: Full=THO complex subunit 7 homolog; AltName: Full=Ngg1-interacting factor 3-like protein 1-binding protein 1;
516	1	UniProt_SwissProt	Q8BUI3	90	72746	3	3	3	3	0.22	RecName: Full=Leucine-rich repeat and WD repeat-containing protein 1; AltName: Full=ORC-associated protein; Short=ORCA; AltName: Full=Origin recognition complex-associated protein;
500	1	UniProt_SwissProt	Q60520	93	145796	6	6	6	6	0.22	RecName: Full=Paired amphipathic helix protein Sin3a; AltName: Full=Histone deacetylase complex subunit Sin3a; AltName: Full=Transcriptional corepressor Sin3a;
419	1	UniProt_SwissProt	Q922R8	117	48469	2	2	2	2	0.21	RecName: Full=Protein disulfide-isomerase A6; EC=5.3.4.1; AltName: Full=Thioredoxin domain-containing protein 7; Flags: Precursor;
623	1	UniProt_SwissProt	Q3TIV5	69	48697	3	2	3	2	0.21	RecName: Full=Zinc finger CCCH domain-containing protein 15; AltName: Full=DRG family-regulatory protein 1; AltName: Full=Epo-immediate response gene protein FM22;
383	1	UniProt_SwissProt	Q9WTI7	129	122723	7	5	7	5	0.21	RecName: Full=Unconventional myosin-Ic; AltName: Full=Myosin I beta; Short=MMI-beta; Short=MMIb;
155	2	UniProt_SwissProt	Q9WVR4	88	74097	3	3	3	3	0.21	RecName: Full=Fragile X mental retardation syndrome-related protein 2;
692	1	UniProt_SwissProt	Q9JHI7	60	49533	2	2	2	2	0.21	RecName: Full=Exosome complex component RRP45; AltName: Full=Autoantigen PM/Scl 1; AltName: Full=Exosome component 9; AltName: Full=P75 polymyositis-scleroderma overlap syndrome-associated autoantigen; AltName: Full=Polymyositis/scleroderma autoantigen 1; AltName: Full=Polymyositis/scleroderma autoantigen 75 kDa; Short=PM/Scl-75;
567	1	UniProt_SwissProt	Q3V1H1	79	74440	5	3	5	3	0.21	RecName: Full=Cytoskeleton-associated protein 2;
680	1	UniProt_SwissProt	P56671	62	49708	3	2	3	2	0.21	RecName: Full=Myc-associated zinc finger protein; Short=MAZI; AltName: Full=Pur-1; AltName: Full=Purine-binding transcription factor;
866	1	UniProt_SwissProt	Q7TN89	40	24761	1	1	1	1	0.21	RecName: Full=GTPase ERas; Short=E-Ras; AltName: Full=Embryonic stem cell-expressed Ras; Flags: Precursor;
555	1	UniProt_SwissProt	Q8BFR5	80	49876	2	2	2	2	0.21	RecName: Full=Elongation factor Tu, mitochondrial; Flags: Precursor;
905	1	UniProt_SwissProt	P84091	37	49965	3	2	3	2	0.21	RecName: Full=AP-2 complex subunit mu; AltName: Full=AP-2 mu chain; AltName: Full=Adapter-related protein complex 2 subunit mu; AltName: Full=Adaptor protein complex AP-2 subunit mu; AltName: Full=Clathrin assembly protein complex 2 mu medium chain; AltName: Full=Clathrin coat assembly protein AP50; AltName: Full=Clathrin coat-associated protein AP50; AltName: Full=Mu2-adaptin; AltName: Full=Plas…
505	1	UniProt_SwissProt	O70251	93	24849	1	1	1	1	0.21	RecName: Full=Elongation factor 1-beta; Short=EF-1-beta;
660	1	UniProt_SwissProt	O54825	64	50037	2	2	2	2	0.21	RecName: Full=Bystin;
317	1	UniProt_SwissProt	Q9JIX8	157	151028	9	6	9	6	0.21	RecName: Full=Apoptotic chromatin condensation inducer in the nucleus; Short=Acinus;
939	1	UniProt_SwissProt	Q8CCI5	32	24990	1	1	1	1	0.21	RecName: Full=RING1 and YY1-binding protein; AltName: Full=Death effector domain-associated factor; Short=DED-associated factor;
204	2	UniProt_SwissProt	Q6IFX2	110	50444	3	2	3	2	0.21	RecName: Full=Keratin, type I cytoskeletal 42; AltName: Full=Cytokeratin-42; Short=CK-42; AltName: Full=Keratin-17n; AltName: Full=Keratin-42; Short=K42; AltName: Full=Type I keratin Ka22;
867	1	UniProt_SwissProt	P63158	40	25049	2	1	2	1	0.21	RecName: Full=High mobility group protein B1; AltName: Full=High mobility group protein 1; Short=HMG-1;
451	1	UniProt_SwissProt	Q9WU62	107	101660	5	4	5	4	0.2	RecName: Full=Inner centromere protein;
650	1	UniProt_SwissProt	Q6ZQL4	66	76246	4	3	4	3	0.2	RecName: Full=WD repeat-containing protein 43;
805	1	UniProt_SwissProt	Q9DBZ5	46	25356	1	1	1	1	0.2	RecName: Full=Eukaryotic translation initiation factor 3 subunit K; Short=eIF3k; AltName: Full=Eukaryotic translation initiation factor 3 subunit 12; AltName: Full=eIF-3 p25;
775	1	UniProt_SwissProt	P63073	49	25266	1	1	1	1	0.2	RecName: Full=Eukaryotic translation initiation factor 4E; Short=eIF-4E; Short=eIF4E; Short=mRNA cap-binding protein; AltName: Full=eIF-4F 25 kDa subunit;
262	1	UniProt_SwissProt	Q9R0I7	187	155146	7	6	7	6	0.2	RecName: Full=YLP motif-containing protein 1; AltName: Full=Nuclear protein ZAP3;
186	1	UniProt_SwissProt	Q9JMH9	245	233637	15	9	15	9	0.2	RecName: Full=Unconventional myosin-XVIIIa; AltName: Full=Molecule associated with JAK3 N-terminus; Short=MAJN; AltName: Full=Myosin containing a PDZ domain;
363	1	UniProt_SwissProt	Q8R0G9	136	129736	8	5	8	5	0.2	RecName: Full=Nuclear pore complex protein Nup133; AltName: Full=133 kDa nucleoporin; AltName: Full=Nucleoporin Nup133;
838	1	UniProt_SwissProt	Q9D0B0	42	25759	4	1	4	1	0.2	RecName: Full=Serine/arginine-rich splicing factor 9; AltName: Full=Splicing factor, arginine/serine-rich 9;
756	1	UniProt_SwissProt	Q8R2U4	52	25746	1	1	1	1	0.2	RecName: Full=N-terminal Xaa-Pro-Lys N-methyltransferase 1; EC=2.1.1.244; AltName: Full=Alpha N-terminal protein methyltransferase 1A; AltName: Full=Methyltransferase-like protein 11A; AltName: Full=X-Pro-Lys N-terminal protein methyltransferase 1A; Short=NTM1A; Contains: RecName: Full=N-terminal Xaa-Pro-Lys N-methyltransferase 1, N-terminally processed;
557	1	UniProt_SwissProt	Q9CQU1	80	51923	3	2	3	2	0.2	RecName: Full=Microfibrillar-associated protein 1;
395	1	UniProt_SwissProt	O88322	124	156610	7	6	7	6	0.2	RecName: Full=Nidogen-2; Short=NID-2; AltName: Full=Entactin-2; Flags: Precursor;
418	1	UniProt_SwissProt	P17427	117	104863	6	4	6	4	0.2	RecName: Full=AP-2 complex subunit alpha-2; AltName: Full=100 kDa coated vesicle protein C; AltName: Full=Adapter-related protein complex 2 subunit alpha-2; AltName: Full=Adaptor protein complex AP-2 subunit alpha-2; AltName: Full=Alpha-adaptin C; AltName: Full=Alpha2-adaptin; AltName: Full=Clathrin assembly protein complex 2 alpha-C large chain; AltName: Full=Plasma membrane adaptor HA2/AP2 adap…
869	1	UniProt_SwissProt	P00405	40	26130	1	1	1	1	0.2	RecName: Full=Cytochrome c oxidase subunit 2; AltName: Full=Cytochrome c oxidase polypeptide II;
398	1	UniProt_SwissProt	Q60793	124	52532	2	2	2	2	0.2	RecName: Full=Krueppel-like factor 4; AltName: Full=Epithelial zinc finger protein EZF; AltName: Full=Gut-enriched krueppel-like factor;
475	1	UniProt_SwissProt	Q91YU8	99	52838	4	3	3	2	0.2	RecName: Full=Suppressor of SWI4 1 homolog; Short=Ssf-1; AltName: Full=Peter Pan homolog;
485	1	UniProt_SwissProt	Q8R1B4	96	106149	5	4	4	4	0.2	RecName: Full=Eukaryotic translation initiation factor 3 subunit C; Short=eIF3c; AltName: Full=Eukaryotic translation initiation factor 3 subunit 8; AltName: Full=eIF3 p110;
638	1	UniProt_SwissProt	Q9JI44	67	53268	2	2	2	2	0.19	RecName: Full=DNA methyltransferase 1-associated protein 1; Short=DNMAP1; Short=DNMT1-associated protein 1; AltName: Full=MAT1-mediated transcriptional repressor;
111	1	UniProt_SwissProt	Q8BTI8	361	295521	15	11	15	11	0.19	RecName: Full=Serine/arginine repetitive matrix protein 2;
247	1	UniProt_SwissProt	Q8BH74	197	107334	5	4	5	4	0.19	RecName: Full=Nuclear pore complex protein Nup107; AltName: Full=107 kDa nucleoporin; AltName: Full=Nucleoporin Nup107;
211	1	UniProt_SwissProt	Q9JKF1	225	189423	11	7	11	7	0.19	RecName: Full=Ras GTPase-activating-like protein IQGAP1;
296	2	UniProt_SwissProt	Q8K4B0	105	81432	5	3	5	3	0.19	RecName: Full=Metastasis-associated protein MTA1;
38	9	UniProt_SwissProt	P15331	46	54349	3	2	3	2	0.19	RecName: Full=Peripherin;
717	1	UniProt_SwissProt	Q9D4J1	56	27154	2	1	2	1	0.19	RecName: Full=EF-hand domain-containing protein D1; AltName: Full=EF-hand domain-containing protein 1; AltName: Full=Swiprosin-2;
644	1	UniProt_SwissProt	Q02257	67	82490	6	3	6	3	0.19	RecName: Full=Junction plakoglobin; AltName: Full=Desmoplakin III; AltName: Full=Desmoplakin-3;
527	1	UniProt_SwissProt	O35691	88	82557	5	3	4	2	0.19	RecName: Full=Pinin;
863	1	UniProt_SwissProt	Q9JIY2	40	55036	2	2	2	2	0.19	RecName: Full=E3 ubiquitin-protein ligase Hakai; EC=6.3.2.-; AltName: Full=Casitas B-lineage lymphoma-transforming sequence-like protein 1; AltName: Full=E-cadherin binding protein E7; AltName: Full=c-Cbl-like protein 1;
242	1	UniProt_SwissProt	Q8CJF7	199	249489	12	9	12	9	0.19	RecName: Full=Protein ELYS; AltName: Full=Embryonic large molecule derived from yolk sac; AltName: Full=Protein MEL-28; AltName: Full=Putative AT-hook-containing transcription factor 1;
477	1	UniProt_SwissProt	Q9CPS7	98	27551	1	1	1	1	0.19	RecName: Full=RNA-binding protein PNO1;
556	1	UniProt_SwissProt	Q9JK30	80	83373	4	3	4	3	0.19	RecName: Full=Origin recognition complex subunit 3; AltName: Full=Origin recognition complex subunit Latheo;
788	1	UniProt_SwissProt	Q9D0I8	47	27642	1	1	1	1	0.19	RecName: Full=mRNA turnover protein 4 homolog;
543	1	UniProt_SwissProt	Q8CCF0	83	55623	4	2	4	2	0.18	RecName: Full=U4/U6 small nuclear ribonucleoprotein Prp31; AltName: Full=Pre-mRNA-processing factor 31; AltName: Full=U4/U6 snRNP 61 kDa protein; Short=Protein 61K;
337	1	UniProt_SwissProt	Q6ZQ03	147	111690	4	4	4	4	0.18	RecName: Full=Formin-binding protein 4; AltName: Full=Formin-binding protein 30;
888	1	UniProt_SwissProt	Q8VE10	38	27781	1	1	1	1	0.18	RecName: Full=N-alpha-acetyltransferase 40; EC=2.3.1.-; AltName: Full=N-acetyltransferase 11; AltName: Full=NatD catalytic subunit;
625	1	UniProt_SwissProt	P24547	69	56179	2	2	2	2	0.18	RecName: Full=Inosine-5'-monophosphate dehydrogenase 2; Short=IMP dehydrogenase 2; Short=IMPD 2; Short=IMPDH 2; EC=1.1.1.205; AltName: Full=IMPDH-II;
339	1	UniProt_SwissProt	Q3V1T4	146	84454	4	4	3	3	0.18	RecName: Full=Prolyl 3-hydroxylase 1; EC=1.14.11.7; AltName: Full=Growth suppressor 1; AltName: Full=Leucine- and proline-enriched proteoglycan 1; Short=Leprecan-1; Flags: Precursor;
630	1	UniProt_SwissProt	Q61335	69	27996	1	1	1	1	0.18	RecName: Full=B-cell receptor-associated protein 31; Short=BCR-associated protein 31; Short=Bap31; AltName: Full=p28;
233	2	UniProt_SwissProt	P07901	120	85134	6	3	6	3	0.18	RecName: Full=Heat shock protein HSP 90-alpha; AltName: Full=Heat shock 86 kDa; Short=HSP 86; Short=HSP86; AltName: Full=Tumor-specific transplantation 86 kDa antigen; Short=TSTA;
716	1	UniProt_SwissProt	Q9CR67	56	28355	1	1	1	1	0.18	RecName: Full=Transmembrane protein 33; AltName: Full=Protein DB83;
489	1	UniProt_SwissProt	Q8BXV2	95	28416	1	1	1	1	0.18	RecName: Full=BRI3-binding protein; Short=I3-binding protein;
509	1	UniProt_SwissProt	P13020	92	86287	3	3	3	3	0.18	RecName: Full=Gelsolin; AltName: Full=Actin-depolymerizing factor; Short=ADF; AltName: Full=Brevin; Flags: Precursor;
539	1	UniProt_SwissProt	Q9WV70	84	86226	4	3	4	3	0.18	RecName: Full=Nucleolar complex protein 2 homolog; Short=Protein NOC2 homolog; AltName: Full=NOC2-like protein; AltName: Full=Novel INHAT repressor;
93	1	UniProt_SwissProt	Q05793	392	407847	23	14	20	14	0.18	RecName: Full=Basement membrane-specific heparan sulfate proteoglycan core protein; Short=HSPG; Contains: RecName: Full=Endorepellin; Contains: RecName: Full=LG3 peptide; Flags: Precursor;
447	1	UniProt_SwissProt	Q8K4P0	108	145632	6	5	6	5	0.18	RecName: Full=pre-mRNA 3' end processing protein WDR33; AltName: Full=WD repeat-containing protein 33; AltName: Full=WD repeat-containing protein WDC146;
830	1	UniProt_SwissProt	Q9DBJ1	43	28928	1	1	1	1	0.18	RecName: Full=Phosphoglycerate mutase 1; EC=3.1.3.13; EC=5.4.2.11; EC=5.4.2.4; AltName: Full=BPG-dependent PGAM 1; AltName: Full=Phosphoglycerate mutase isozyme B; Short=PGAM-B;
436	2	UniProt_SwissProt	O35343	77	58400	3	2	2	2	0.18	RecName: Full=Importin subunit alpha-3; AltName: Full=Importin alpha Q1; Short=Qip1; AltName: Full=Karyopherin subunit alpha-4;
442	1	UniProt_SwissProt	Q80XL6	109	88052	4	3	4	3	0.17	RecName: Full=Acyl-CoA dehydrogenase family member 11; Short=ACAD-11; EC=1.3.99.-;
966	1	UniProt_SwissProt	Q9D7W5	28	29238	1	1	1	1	0.17	RecName: Full=Mediator of RNA polymerase II transcription subunit 8; AltName: Full=Activator-recruited cofactor 32 kDa component; Short=ARC32; AltName: Full=Mediator complex subunit 8;
585	1	UniProt_SwissProt	Q3URS2	75	58752	3	2	3	2	0.17	RecName: Full=Zinc finger and SCAN domain containing protein 4F;
628	1	UniProt_SwissProt	Q8BX09	69	59745	3	2	3	2	0.17	RecName: Full=Retinoblastoma-binding protein 5; Short=RBBP-5;
589	1	UniProt_SwissProt	P49135	75	89925	5	3	5	3	0.17	RecName: Full=TFIIH basal transcription factor complex helicase XPB subunit; EC=3.6.4.12; AltName: Full=Basic transcription factor 2 89 kDa subunit; Short=BTF2 p89; AltName: Full=DNA excision repair protein ERCC-3; AltName: Full=DNA repair protein complementing XP-B cells; AltName: Full=TFIIH 89 kDa subunit; AltName: Full=Xeroderma pigmentosum group B-complementing protein;
769	1	UniProt_SwissProt	O88796	50	29854	1	1	1	1	0.17	RecName: Full=Ribonuclease P protein subunit p30; Short=RNaseP protein p30; EC=3.1.26.5; AltName: Full=RNase P subunit 2;
931	1	UniProt_SwissProt	Q4VBF2	33	29869	2	1	2	1	0.17	RecName: Full=R3H domain-containing protein 4;
72	2	UniProt_SwissProt	Q6DIC0	231	180711	7	7	6	6	0.17	RecName: Full=Probable global transcription activator SNF2L2; EC=3.6.4.-; AltName: Full=ATP-dependent helicase SMARCA2; AltName: Full=BRG1-associated factor 190B; Short=BAF190B; AltName: Full=Protein brahma homolog; AltName: Full=SNF2-alpha; AltName: Full=SWI/SNF-related matrix-associated actin-dependent regulator of chromatin subfamily A member 2;
578	1	UniProt_SwissProt	P42932	77	60088	4	2	4	2	0.17	RecName: Full=T-complex protein 1 subunit theta; Short=TCP-1-theta; AltName: Full=CCT-theta;
592	1	UniProt_SwissProt	P80316	75	60042	2	2	2	2	0.17	RecName: Full=T-complex protein 1 subunit epsilon; Short=TCP-1-epsilon; AltName: Full=CCT-epsilon;
240	1	UniProt_SwissProt	P39061	200	183085	6	6	6	6	0.17	RecName: Full=Collagen alpha-1(XVIII) chain; Contains: RecName: Full=Endostatin; Flags: Precursor;
655	1	UniProt_SwissProt	Q8R2T8	65	60920	2	2	2	2	0.17	RecName: Full=General transcription factor 3C polypeptide 5; AltName: Full=TF3C-epsilon; AltName: Full=Transcription factor IIIC 63 kDa subunit; Short=TFIIIC 63 kDa subunit; Short=TFIIIC63; AltName: Full=Transcription factor IIIC subunit epsilon;
745	1	UniProt_SwissProt	Q91VJ5	52	30636	1	1	1	1	0.17	RecName: Full=Polyglutamine-binding protein 1; Short=PQBP-1; AltName: Full=38 kDa nuclear protein containing a WW domain; Short=Npw38; AltName: Full=Polyglutamine tract-binding protein 1;
674	1	UniProt_SwissProt	Q5SU73	62	62392	2	2	2	2	0.16	RecName: Full=Coilin; AltName: Full=p80;
703	1	UniProt_SwissProt	Q9CYX7	58	31210	2	1	2	1	0.16	RecName: Full=RRP15-like protein; AltName: Full=Ribosomal RNA-processing protein 15;
700	1	UniProt_SwissProt	Q9R0U0	58	31339	3	1	3	1	0.16	RecName: Full=Serine/arginine-rich splicing factor 10; AltName: Full=FUS-interacting serine-arginine-rich protein 1; AltName: Full=Neural-salient serine/arginine-rich protein; AltName: Full=Neural-specific SR protein; AltName: Full=Splicing factor, arginine/serine-rich 13A; AltName: Full=TLS-associated protein with Ser-Arg repeats; Short=TASR; Short=TLS-associated protein with SR repeats; AltName…
837	1	UniProt_SwissProt	P97760	42	31634	2	1	2	1	0.16	RecName: Full=DNA-directed RNA polymerase II subunit RPB3; Short=RNA polymerase II subunit 3; Short=RNA polymerase II subunit B3; AltName: Full=DNA-directed RNA polymerase II 33 kDa polypeptide; Short=RPB33; AltName: Full=DNA-directed RNA polymerase II subunit C; AltName: Full=RPB31;
624	1	UniProt_SwissProt	P51655	69	63629	3	2	3	2	0.16	RecName: Full=Glypican-4; AltName: Full=K-glypican; Contains: RecName: Full=Secreted glypican-4; Flags: Precursor;
132	2	UniProt_SwissProt	Q9CPN8	69	63878	2	2	2	2	0.16	RecName: Full=Insulin-like growth factor 2 mRNA-binding protein 3; Short=IGF2 mRNA-binding protein 3; Short=IMP-3; Short=mIMP-3; AltName: Full=IGF-II mRNA-binding protein 3; AltName: Full=VICKZ family member 3;
577	1	UniProt_SwissProt	Q9DBE9	78	95873	5	3	5	3	0.16	RecName: Full=pre-rRNA processing protein FTSJ3; EC=2.1.1.-; AltName: Full=2'-O-ribose RNA methyltransferase SPB1 homolog; AltName: Full=Protein ftsJ homolog 3; AltName: Full=Putative rRNA methyltransferase 3;
330	1	UniProt_SwissProt	Q9Z0W3	150	160126	8	5	8	5	0.16	RecName: Full=Nuclear pore complex protein Nup160; AltName: Full=160 kDa nucleoporin; AltName: Full=Gene trap locus 1-13 protein; Short=GTL-13; AltName: Full=Nucleoporin Nup160;
669	1	UniProt_SwissProt	Q80SY5	63	63943	4	2	4	2	0.16	RecName: Full=Pre-mRNA-splicing factor 38B;
754	1	UniProt_SwissProt	Q9CY50	52	32045	1	1	1	1	0.16	RecName: Full=Translocon-associated protein subunit alpha; Short=TRAP-alpha; AltName: Full=Signal sequence receptor subunit alpha; Short=SSR-alpha; Flags: Precursor;
348	1	UniProt_SwissProt	Q8R5K4	141	130002	5	4	5	4	0.16	RecName: Full=Nucleolar protein 6; AltName: Full=Nucleolar RNA-associated protein; Short=Nrap;
665	1	UniProt_SwissProt	Q60930	63	32340	1	1	1	1	0.16	RecName: Full=Voltage-dependent anion-selective channel protein 2; Short=VDAC-2; Short=mVDAC2; AltName: Full=Outer mitochondrial membrane protein porin 2; AltName: Full=Voltage-dependent anion-selective channel protein 6; Short=VDAC-6; Short=mVDAC6;
525	1	UniProt_SwissProt	Q8CCS6	89	32391	2	1	1	1	0.16	RecName: Full=Polyadenylate-binding protein 2; Short=PABP-2; Short=Poly(A)-binding protein 2; AltName: Full=Nuclear poly(A)-binding protein 1; AltName: Full=Poly(A)-binding protein II; Short=PABII; AltName: Full=Polyadenylate-binding nuclear protein 1;
932	1	UniProt_SwissProt	Q9D0M0	33	32489	1	1	1	1	0.16	RecName: Full=Exosome complex exonuclease RRP42; AltName: Full=Exosome component 7; AltName: Full=Ribosomal RNA-processing protein 42;
696	1	UniProt_SwissProt	Q3V1V3	59	98216	4	3	4	3	0.16	RecName: Full=ESF1 homolog; AltName: Full=ABT1-associated protein;
596	1	UniProt_SwissProt	Q91W39	74	65508	2	2	2	2	0.16	RecName: Full=Nuclear receptor coactivator 5; Short=NCoA-5; AltName: Full=Coactivator independent of AF-2; Short=CIA;
943	1	UniProt_SwissProt	Q9D1C9	32	32607	1	1	1	1	0.15	RecName: Full=Ribosomal RNA-processing protein 7 homolog A; AltName: Full=Gastric cancer antigen Zg14 homolog;
554	1	UniProt_SwissProt	O54931	81	99032	6	3	6	3	0.15	RecName: Full=A-kinase anchor protein 2; Short=AKAP-2; AltName: Full=AKAP expressed in kidney and lung; Short=AKAP-KL; AltName: Full=Protein kinase A-anchoring protein 2; Short=PRKA2;
403	1	UniProt_SwissProt	Q6PFD9	122	198316	9	6	9	6	0.15	RecName: Full=Nuclear pore complex protein Nup98-Nup96; Contains: RecName: Full=Nuclear pore complex protein Nup98; AltName: Full=98 kDa nucleoporin; AltName: Full=Nucleoporin Nup98; Short=Nup98; Contains: RecName: Full=Nuclear pore complex protein Nup96; AltName: Full=96 kDa nucleoporin; AltName: Full=Nucleoporin Nup96; Short=Nup96; Flags: Precursor;
571	1	UniProt_SwissProt	Q76MZ3	78	66079	4	2	4	2	0.15	RecName: Full=Serine/threonine-protein phosphatase 2A 65 kDa regulatory subunit A alpha isoform; AltName: Full=PP2A subunit A isoform PR65-alpha; AltName: Full=PP2A subunit A isoform R1-alpha;
587	1	UniProt_SwissProt	P97868	75	200492	10	6	10	6	0.15	RecName: Full=E3 ubiquitin-protein ligase RBBP6; EC=6.3.2.-; AltName: Full=Proliferation potential-related protein; AltName: Full=Protein P2P-R; AltName: Full=Retinoblastoma-binding protein 6; AltName: Full=p53-associated cellular protein of testis;
401	1	UniProt_SwissProt	P26231	123	100728	6	3	6	3	0.15	RecName: Full=Catenin alpha-1; AltName: Full=102 kDa cadherin-associated protein; AltName: Full=Alpha E-catenin; AltName: Full=CAP102;
800	1	UniProt_SwissProt	Q9D773	46	33548	1	1	1	1	0.15	RecName: Full=39S ribosomal protein L2, mitochondrial; Short=L2mt; Short=MRP-L2; Flags: Precursor;
822	1	UniProt_SwissProt	O55125	44	33570	1	1	1	1	0.15	RecName: Full=Protein NipSnap homolog 1; Short=NipSnap1;
925	1	UniProt_SwissProt	Q62447	34	33618	1	1	1	1	0.15	RecName: Full=Cyclin-C;
296	3	UniProt_SwissProt	Q924K8	92	67719	5	2	5	2	0.15	RecName: Full=Metastasis-associated protein MTA3;
772	1	UniProt_SwissProt	Q9JKY0	50	33922	1	1	1	1	0.15	RecName: Full=Cell differentiation protein RCD1 homolog; Short=Rcd-1; AltName: Full=CCR4-NOT transcription complex subunit 9; AltName: Full=EPO-induced protein FL10;
828	1	UniProt_SwissProt	Q02614	43	33926	1	1	1	1	0.15	RecName: Full=SAP30-binding protein; AltName: Full=Transcriptional regulator protein HCNGP;
751	1	UniProt_SwissProt	Q99M28	52	34188	6	1	4	1	0.15	RecName: Full=RNA-binding protein with serine-rich domain 1;
211	2	UniProt_SwissProt	Q05D44	54	137988	6	4	6	4	0.15	RecName: Full=Eukaryotic translation initiation factor 5B; Short=eIF-5B; AltName: Full=Translation initiation factor IF-2;
892	1	UniProt_SwissProt	Q9CVB6	38	34450	3	1	3	1	0.15	RecName: Full=Actin-related protein 2/3 complex subunit 2; AltName: Full=Arp2/3 complex 34 kDa subunit; Short=p34-ARC;
502	1	UniProt_SwissProt	Q9DBG6	93	69134	2	2	2	2	0.15	RecName: Full=Dolichyl-diphosphooligosaccharide--protein glycosyltransferase subunit 2; EC=2.4.99.18; AltName: Full=Dolichyl-diphosphooligosaccharide--protein glycosyltransferase 63 kDa subunit; AltName: Full=Ribophorin II; Short=RPN-II; AltName: Full=Ribophorin-2; Flags: Precursor;
561	1	UniProt_SwissProt	Q99KB8	80	34519	1	1	1	1	0.15	RecName: Full=Hydroxyacylglutathione hydrolase, mitochondrial; EC=3.1.2.6; AltName: Full=Glyoxalase II; Short=Glx II; Flags: Precursor;
581	1	UniProt_SwissProt	A6PWY4	76	69478	2	2	2	2	0.15	RecName: Full=WD repeat-containing protein 76;
536	1	UniProt_SwissProt	Q99KD5	85	104579	5	3	5	3	0.15	RecName: Full=Protein unc-45 homolog A; Short=Unc-45A; AltName: Full=Stromal membrane-associated protein 1; Short=SMAP-1;
634	1	UniProt_SwissProt	Q9D903	68	34795	2	1	2	1	0.14	RecName: Full=Probable rRNA-processing protein EBP2;
425	1	UniProt_SwissProt	Q8CIE6	114	139997	5	4	5	4	0.14	RecName: Full=Coatomer subunit alpha; AltName: Full=Alpha-coat protein; Short=Alpha-COP; Contains: RecName: Full=Xenin; AltName: Full=Xenopsin-related peptide; Contains: RecName: Full=Proxenin;
522	1	UniProt_SwissProt	Q8VD76	89	34906	1	1	1	1	0.14	RecName: Full=General transcription factor IIH subunit 3; AltName: Full=Basic transcription factor 2 34 kDa subunit; Short=BTF2 p34; AltName: Full=General transcription factor IIH polypeptide 3; AltName: Full=TFIIH basal transcription factor complex p34 subunit;
513	1	UniProt_SwissProt	P30999	91	105430	5	3	5	3	0.14	RecName: Full=Catenin delta-1; AltName: Full=Cadherin-associated Src substrate; Short=CAS; AltName: Full=p120 catenin; Short=p120(ctn); AltName: Full=p120(cas);
361	1	UniProt_SwissProt	Q6P4S8	137	247123	7	7	7	7	0.14	RecName: Full=Integrator complex subunit 1; Short=Int1;
452	1	UniProt_SwissProt	Q9CW03	106	141867	12	4	11	3	0.14	RecName: Full=Structural maintenance of chromosomes protein 3; Short=SMC protein 3; Short=SMC-3; AltName: Full=Basement membrane-associated chondroitin proteoglycan; Short=Bamacan; AltName: Full=Chondroitin sulfate proteoglycan 6; AltName: Full=Chromosome segregation protein SmcD; AltName: Full=Mad member-interacting protein 1;
760	1	UniProt_SwissProt	P14094	51	35571	2	1	2	1	0.14	RecName: Full=Sodium/potassium-transporting ATPase subunit beta-1; AltName: Full=Sodium/potassium-dependent ATPase subunit beta-1;
45	2	UniProt_SwissProt	A2A4P0	98	143337	5	5	3	3	0.14	RecName: Full=ATP-dependent RNA helicase DHX8; EC=3.6.4.13; AltName: Full=DEAH box protein 8;
573	1	UniProt_SwissProt	Q91Z49	78	35923	1	1	1	1	0.14	RecName: Full=UAP56-interacting factor; AltName: Full=Forty-two-three domain-containing protein 1; Short=Protein 40-2-3;
893	1	UniProt_SwissProt	Q8BJZ4	38	36352	2	1	2	1	0.14	RecName: Full=28S ribosomal protein S35, mitochondrial; Short=MRP-S35; Short=S35mt; Flags: Precursor;
663	1	UniProt_SwissProt	Q6J1H4	63	36443	2	1	2	1	0.14	RecName: Full=Undifferentiated embryonic cell transcription factor 1;
157	1	UniProt_SwissProt	P70670	273	221277	8	6	7	5	0.14	RecName: Full=Nascent polypeptide-associated complex subunit alpha, muscle-specific form; AltName: Full=Alpha-NAC, muscle-specific form;
962	1	UniProt_SwissProt	Q04841	29	36734	1	1	1	1	0.14	RecName: Full=DNA-3-methyladenine glycosylase; EC=3.2.2.21; AltName: Full=3-alkyladenine DNA glycosylase; AltName: Full=3-methyladenine DNA glycosidase; AltName: Full=ADPG; AltName: Full=N-methylpurine-DNA glycosylase;
164	2	UniProt_SwissProt	Q91WM1	89	74342	2	2	2	2	0.14	RecName: Full=Spermatid perinuclear RNA-binding protein;
720	1	UniProt_SwissProt	Q99ME9	55	74465	2	2	2	2	0.14	RecName: Full=Nucleolar GTP-binding protein 1; AltName: Full=Chronic renal failure gene protein; AltName: Full=GTP-binding protein NGB;
784	1	UniProt_SwissProt	Q9R020	48	37784	2	1	2	1	0.13	RecName: Full=Zinc finger Ran-binding domain-containing protein 2; AltName: Full=Zinc finger protein 265; AltName: Full=Zinc finger, splicing;
487	1	UniProt_SwissProt	Q8R480	95	75868	2	2	2	2	0.13	RecName: Full=Nuclear pore complex protein Nup85; AltName: Full=85 kDa nucleoporin; AltName: Full=FROUNT; AltName: Full=Nucleoporin Nup85; AltName: Full=Pericentrin-1;
868	1	UniProt_SwissProt	Q9WUP7	40	37878	1	1	1	1	0.13	RecName: Full=Ubiquitin carboxyl-terminal hydrolase isozyme L5; Short=UCH-L5; EC=3.4.19.12; AltName: Full=Ubiquitin C-terminal hydrolase UCH37; AltName: Full=Ubiquitin thioesterase L5;
119	2	UniProt_SwissProt	Q80TJ7	52	114508	6	3	5	3	0.13	RecName: Full=Histone lysine demethylase PHF8; EC=1.14.11.27; AltName: Full=PHD finger protein 8;
687	1	UniProt_SwissProt	Q9DCH4	60	38074	1	1	1	1	0.13	RecName: Full=Eukaryotic translation initiation factor 3 subunit F; Short=eIF3f; AltName: Full=Deubiquitinating enzyme eIF3f; EC=3.4.19.12; AltName: Full=Eukaryotic translation initiation factor 3 subunit 5; AltName: Full=eIF-3-epsilon; AltName: Full=eIF3 p47;
873	1	UniProt_SwissProt	A7RDN6	40	38257	2	1	1	1	0.13	RecName: Full=Renalase; EC=1.4.-.-; AltName: Full=Monoamine oxidase-C; Short=MAO-C; Short=mMAO-C; Flags: Precursor;
562	1	UniProt_SwissProt	Q497V5	79	115674	5	3	5	3	0.13	RecName: Full=S1 RNA-binding domain-containing protein 1;
743	1	UniProt_SwissProt	Q6DID5	52	77048	2	2	2	2	0.13	RecName: Full=PWWP domain-containing protein MUM1; AltName: Full=Mutated melanoma-associated antigen 1; Short=MUM-1;
575	1	UniProt_SwissProt	Q8K224	78	116258	5	3	5	3	0.13	RecName: Full=N-acetyltransferase 10; EC=2.3.1.-;
697	1	UniProt_SwissProt	O55143	59	116437	4	3	3	3	0.13	RecName: Full=Sarcoplasmic/endoplasmic reticulum calcium ATPase 2; Short=SERCA2; Short=SR Ca(2+)-ATPase 2; EC=3.6.3.8; AltName: Full=Calcium pump 2; AltName: Full=Calcium-transporting ATPase sarcoplasmic reticulum type, slow twitch skeletal muscle isoform; AltName: Full=Endoplasmic reticulum class 1/2 Ca(2+) ATPase;
526	1	UniProt_SwissProt	Q80X50	88	116842	5	3	4	3	0.13	RecName: Full=Ubiquitin-associated protein 2-like;
538	1	UniProt_SwissProt	P97434	84	117192	5	3	5	3	0.13	RecName: Full=Myosin phosphatase Rho-interacting protein; AltName: Full=Rho-interacting protein 3; Short=RIP3; AltName: Full=p116Rip;
205	1	UniProt_SwissProt	F6ZDS4	230	274223	10	7	10	7	0.13	RecName: Full=Nucleoprotein TPR; AltName: Full=NPC-associated intranuclear protein; AltName: Full=Translocated promoter region and nuclear basket protein;
972	1	UniProt_SwissProt	P07356	27	38937	1	1	1	1	0.13	RecName: Full=Annexin A2; AltName: Full=Annexin II; AltName: Full=Annexin-2; AltName: Full=Calpactin I heavy chain; AltName: Full=Calpactin-1 heavy chain; AltName: Full=Chromobindin-8; AltName: Full=Lipocortin II; AltName: Full=Placental anticoagulant protein IV; Short=PAP-IV; AltName: Full=Protein I; AltName: Full=p36;
658	1	UniProt_SwissProt	P27546	64	117927	6	3	6	3	0.13	RecName: Full=Microtubule-associated protein 4; Short=MAP-4;
955	1	UniProt_SwissProt	Q9WUK4	30	39156	1	1	1	1	0.13	RecName: Full=Replication factor C subunit 2; AltName: Full=Activator 1 40 kDa subunit; Short=A1 40 kDa subunit; AltName: Full=Activator 1 subunit 2; AltName: Full=Replication factor C 40 kDa subunit; Short=RF-C 40 kDa subunit; Short=RFC40;
652	1	UniProt_SwissProt	Q8R080	66	79160	4	2	4	2	0.13	RecName: Full=G2 and S phase-expressed protein 1; Short=GTSE-1; AltName: Full=Protein B99;
851	1	UniProt_SwissProt	P23881	41	39566	1	1	1	1	0.13	RecName: Full=Transcription elongation factor A protein 3; AltName: Full=Transcription elongation factor S-II protein 3; AltName: Full=Transcription elongation factor TFIIS.h;
648	1	UniProt_SwissProt	P61963	66	39528	1	1	1	1	0.13	RecName: Full=DDB1- and CUL4-associated factor 7; AltName: Full=WD repeat-containing protein 68; AltName: Full=WD repeat-containing protein An11 homolog;
75	2	UniProt_SwissProt	Q7TPD0	142	119401	3	3	3	3	0.13	RecName: Full=Integrator complex subunit 3; Short=Int3; AltName: Full=SOSS complex subunit A; AltName: Full=Sensor of single-strand DNA complex subunit A; Short=SOSS-A; Short=Sensor of ssDNA subunit A;
786	1	UniProt_SwissProt	Q80UZ2	48	79850	2	2	2	2	0.13	RecName: Full=Protein SDA1 homolog; AltName: Full=SDA1 domain-containing protein 1;
570	1	UniProt_SwissProt	Q91WK2	78	39978	1	1	1	1	0.13	RecName: Full=Eukaryotic translation initiation factor 3 subunit H; Short=eIF3h; AltName: Full=Eukaryotic translation initiation factor 3 subunit 3; AltName: Full=eIF-3-gamma; AltName: Full=eIF3 p40 subunit;
968	1	UniProt_SwissProt	Q8VEM8	28	40063	2	1	2	1	0.12	RecName: Full=Phosphate carrier protein, mitochondrial; AltName: Full=Phosphate transport protein; Short=PTP; AltName: Full=Solute carrier family 25 member 3; Flags: Precursor;
615	1	UniProt_SwissProt	Q91YR1	71	40283	2	1	2	1	0.12	RecName: Full=Twinfilin-1; AltName: Full=Protein A6;
673	1	UniProt_SwissProt	P23116	62	162237	7	4	7	4	0.12	RecName: Full=Eukaryotic translation initiation factor 3 subunit A; Short=eIF3a; AltName: Full=Centrosomin; AltName: Full=Eukaryotic translation initiation factor 3 subunit 10; AltName: Full=eIF-3-theta; AltName: Full=eIF3 p167; AltName: Full=eIF3 p180; AltName: Full=eIF3 p185; AltName: Full=p162;
889	1	UniProt_SwissProt	Q8R1N0	38	40805	1	1	1	1	0.12	RecName: Full=Zinc finger protein 830; AltName: Full=Coiled-coil domain-containing protein 16; AltName: Full=Ovus mutant candidate gene 1 protein;
396	1	UniProt_SwissProt	Q14AX6	124	164322	5	4	5	4	0.12	RecName: Full=Cyclin-dependent kinase 12; EC=2.7.11.22; EC=2.7.11.23; AltName: Full=Cdc2-related kinase, arginine/serine-rich; Short=CrkRS; AltName: Full=Cell division cycle 2-related protein kinase 7; Short=CDC2-related protein kinase 7; AltName: Full=Cell division protein kinase 12;
611	1	UniProt_SwissProt	Q3TZX8	73	82043	2	2	2	2	0.12	RecName: Full=Polynucleotide 5'-hydroxyl-kinase NOL9; EC=2.7.1.-; AltName: Full=Nucleolar protein 9;
796	1	UniProt_SwissProt	Q62481	47	40987	2	1	2	1	0.12	RecName: Full=Vacuolar protein sorting-associated protein 72 homolog; AltName: Full=Protein YL-1; AltName: Full=Transcription factor-like 1;
12	2	UniProt_SwissProt	Q99MJ9	51	82695	4	2	4	2	0.12	RecName: Full=ATP-dependent RNA helicase DDX50; EC=3.6.4.13; AltName: Full=DEAD box protein 50; AltName: Full=Gu-beta; AltName: Full=Nucleolar protein Gu2;
553	1	UniProt_SwissProt	Q8K298	81	124201	3	3	3	3	0.12	RecName: Full=Actin-binding protein anillin;
764	1	UniProt_SwissProt	Q8BSY0	51	83390	3	2	3	2	0.12	RecName: Full=Aspartyl/asparaginyl beta-hydroxylase; EC=1.14.11.16; AltName: Full=Aspartate beta-hydroxylase; Short=ASP beta-hydroxylase; AltName: Full=Peptide-aspartate beta-dioxygenase;
691	1	UniProt_SwissProt	P60762	60	41581	2	1	2	1	0.12	RecName: Full=Mortality factor 4-like protein 1; AltName: Full=MORF-related gene 15 protein; AltName: Full=Testis-expressed gene 189 protein; AltName: Full=Transcription factor-like protein MRG15;
919	1	UniProt_SwissProt	P42208	35	41727	2	1	2	1	0.12	RecName: Full=Septin-2; AltName: Full=Neural precursor cell expressed developmentally down-regulated protein 5; Short=NEDD-5;
971	1	UniProt_SwissProt	Q8R3H7	27	42072	1	1	1	1	0.12	RecName: Full=Heparan sulfate 2-O-sulfotransferase 1; Short=2-O-sulfotransferase; Short=2-OST; Short=2OST; EC=2.8.2.-;
841	1	UniProt_SwissProt	Q9D4J7	42	42253	1	1	1	1	0.12	RecName: Full=PHD finger protein 6;
710	1	UniProt_SwissProt	Q00PI9	56	85515	2	2	2	2	0.12	RecName: Full=Heterogeneous nuclear ribonucleoprotein U-like protein 2; AltName: Full=MLF1-associated nuclear protein;
444	1	UniProt_SwissProt	Q3UMG5	109	85734	2	2	2	2	0.12	RecName: Full=Leucine-rich repeat and calponin homology domain-containing protein 2;
799	1	UniProt_SwissProt	Q8VCM4	46	42746	1	1	1	1	0.12	RecName: Full=Lipoyltransferase 1, mitochondrial; EC=2.3.1.-; AltName: Full=Lipoate biosynthesis protein; AltName: Full=Lipoate-protein ligase; AltName: Full=Lipoyl ligase; Flags: Precursor;
498	1	UniProt_SwissProt	Q3UHX0	93	129582	5	3	4	3	0.12	RecName: Full=Nucleolar protein 8;
923	1	UniProt_SwissProt	Q9JIF0	35	43035	1	1	1	1	0.12	RecName: Full=Protein arginine N-methyltransferase 1; EC=2.1.1.-; AltName: Full=Histone-arginine N-methyltransferase PRMT1; EC=2.1.1.125;
726	1	UniProt_SwissProt	Q7TNV0	55	43360	2	1	2	1	0.11	RecName: Full=Protein DEK;
969	1	UniProt_SwissProt	Q3UHX9	27	43444	3	1	3	1	0.11	RecName: Full=Uncharacterized protein C9orf114 homolog;
667	1	UniProt_SwissProt	Q91VL8	63	43611	1	1	1	1	0.11	RecName: Full=Telomeric repeat-binding factor 2-interacting protein 1; Short=TERF2-interacting telomeric protein 1; Short=TRF2-interacting telomeric protein 1; AltName: Full=Repressor/activator protein 1 homolog; Short=RAP1 homolog;
631	1	UniProt_SwissProt	Q8BGA5	69	43739	2	1	2	1	0.11	RecName: Full=KRR1 small subunit processome component homolog; AltName: Full=HIV-1 Rev-binding protein 2 homolog; AltName: Full=KRR-R motif-containing protein 1;
954	1	UniProt_SwissProt	P70318	30	43703	2	1	2	1	0.11	RecName: Full=Nucleolysin TIAR; AltName: Full=TIA-1-related protein;
597	1	UniProt_SwissProt	Q8K2H1	74	44037	1	1	1	1	0.11	RecName: Full=Periphilin-1;
912	1	UniProt_SwissProt	Q61733	36	44082	1	1	1	1	0.11	RecName: Full=28S ribosomal protein S31, mitochondrial; Short=MRP-S31; Short=S31mt; AltName: Full=Imogen 38; Flags: Precursor;
698	1	UniProt_SwissProt	Q9Z0H3	58	44398	1	1	1	1	0.11	RecName: Full=SWI/SNF-related matrix-associated actin-dependent regulator of chromatin subfamily B member 1; AltName: Full=BRG1-associated factor 47; Short=BAF47; AltName: Full=Integrase interactor 1 protein; AltName: Full=SNF5 homolog; Short=mSNF5;
836	1	UniProt_SwissProt	Q8QZY9	42	44384	1	1	1	1	0.11	RecName: Full=Splicing factor 3B subunit 4;
910	1	UniProt_SwissProt	P62334	36	44430	1	1	1	1	0.11	RecName: Full=26S protease regulatory subunit 10B; AltName: Full=26S proteasome AAA-ATPase subunit RPT4; AltName: Full=Proteasome 26S subunit ATPase 6; AltName: Full=Proteasome subunit p42;
529	1	UniProt_SwissProt	Q8VDF2	87	89673	3	2	3	2	0.11	RecName: Full=E3 ubiquitin-protein ligase UHRF1; EC=6.3.2.-; AltName: Full=Nuclear protein 95; AltName: Full=Nuclear zinc finger protein Np95; AltName: Full=Ubiquitin-like PHD and RING finger domain-containing protein 1; Short=mUhrf1; AltName: Full=Ubiquitin-like-containing PHD and RING finger domains protein 1;
965	1	UniProt_SwissProt	Q8BG60	28	44962	1	1	1	1	0.11	RecName: Full=Thioredoxin-interacting protein; AltName: Full=Vitamin D3 up-regulated protein 1;
486	1	UniProt_SwissProt	Q61103	96	45342	1	1	1	1	0.11	RecName: Full=Zinc finger protein ubi-d4; AltName: Full=Apoptosis response zinc finger protein; AltName: Full=BRG1-associated factor 45D; Short=BAF45D; AltName: Full=D4, zinc and double PHD fingers family 2; AltName: Full=Protein requiem;
346	1	UniProt_SwissProt	P02468	142	182830	4	4	4	4	0.11	RecName: Full=Laminin subunit gamma-1; AltName: Full=Laminin B2 chain; AltName: Full=Laminin-1 subunit gamma; AltName: Full=Laminin-10 subunit gamma; AltName: Full=Laminin-11 subunit gamma; AltName: Full=Laminin-2 subunit gamma; AltName: Full=Laminin-3 subunit gamma; AltName: Full=Laminin-4 subunit gamma; AltName: Full=Laminin-6 subunit gamma; AltName: Full=Laminin-7 subunit gamma; AltName: Full=…
46	2	UniProt_SwissProt	O70305	86	137255	3	3	3	3	0.11	RecName: Full=Ataxin-2; AltName: Full=Spinocerebellar ataxia type 2 protein homolog;
598	1	UniProt_SwissProt	Q61543	74	137524	3	3	3	3	0.11	RecName: Full=Golgi apparatus protein 1; AltName: Full=E-selectin ligand 1; Short=ESL-1; Short=Selel; AltName: Full=Golgi sialoglycoprotein MG-160; Flags: Precursor;
856	1	UniProt_SwissProt	Q8C0I4	41	91758	2	2	2	2	0.11	RecName: Full=Enhancer of polycomb homolog 2; AltName: Full=EPC-like;
640	1	UniProt_SwissProt	Q3UYV9	67	92951	3	2	3	2	0.11	RecName: Full=Nuclear cap-binding protein subunit 1; AltName: Full=80 kDa nuclear cap-binding protein; Short=CBP80; Short=NCBP 80 kDa subunit;
833	1	UniProt_SwissProt	Q8BSF4	43	46354	1	1	1	1	0.11	RecName: Full=Phosphatidylserine decarboxylase proenzyme; EC=4.1.1.65; Contains: RecName: Full=Phosphatidylserine decarboxylase alpha chain; Contains: RecName: Full=Phosphatidylserine decarboxylase beta chain;
670	1	UniProt_SwissProt	Q9QYJ0	63	46344	2	1	2	1	0.11	RecName: Full=DnaJ homolog subfamily A member 2; AltName: Full=mDj3; Flags: Precursor;
609	1	UniProt_SwissProt	Q6PGF3	73	93437	2	2	2	2	0.11	RecName: Full=Mediator of RNA polymerase II transcription subunit 16; AltName: Full=Mediator complex subunit 16; AltName: Full=Thyroid hormone receptor-associated protein 5; AltName: Full=Thyroid hormone receptor-associated protein complex 95 kDa component; Short=Trap95; AltName: Full=Vitamin D3 receptor-interacting protein complex 92 kDa component; Short=DRIP92;
834	1	UniProt_SwissProt	P19324	43	46618	1	1	1	1	0.11	RecName: Full=Serpin H1; AltName: Full=47 kDa heat shock protein; AltName: Full=Collagen-binding protein; Short=Colligin; AltName: Full=Serine protease inhibitor J6; Flags: Precursor;
636	1	UniProt_SwissProt	O54941	68	46667	1	1	1	1	0.11	RecName: Full=SWI/SNF-related matrix-associated actin-dependent regulator of chromatin subfamily E member 1; AltName: Full=BRG1-associated factor 57; Short=BAF57;
488	1	UniProt_SwissProt	Q9ER74	95	141795	3	3	3	3	0.11	RecName: Full=Sal-like protein 1; AltName: Full=Zinc finger protein Spalt-3; Short=Sal-3; Short=mSal-3;
735	1	UniProt_SwissProt	O08917	53	47769	2	1	2	1	0.1	RecName: Full=Flotillin-1;
460	1	UniProt_SwissProt	Q8VDM6	105	96513	2	2	2	2	0.1	RecName: Full=Heterogeneous nuclear ribonucleoprotein U-like protein 1;
712	1	UniProt_SwissProt	Q8BK72	56	48147	1	1	1	1	0.1	RecName: Full=28S ribosomal protein S27, mitochondrial; Short=MRP-S27; Short=S27mt;
550	1	UniProt_SwissProt	Q9DB77	81	48262	1	1	1	1	0.1	RecName: Full=Cytochrome b-c1 complex subunit 2, mitochondrial; AltName: Full=Complex III subunit 2; AltName: Full=Core protein II; AltName: Full=Ubiquinol-cytochrome-c reductase complex core protein 2; Flags: Precursor;
471	1	UniProt_SwissProt	A2BH40	101	242852	6	5	6	5	0.1	RecName: Full=AT-rich interactive domain-containing protein 1A; Short=ARID domain-containing protein 1A; AltName: Full=BRG1-associated factor 250; Short=BAF250; AltName: Full=BRG1-associated factor 250a; Short=BAF250A; AltName: Full=Osa homolog 1; AltName: Full=SWI-like protein; AltName: Full=SWI/SNF complex protein p270; AltName: Full=SWI/SNF-related, matrix-associated, actin-dependent regulator…
76	2	UniProt_SwissProt	Q8R1A4	139	243167	8	5	6	4	0.1	RecName: Full=Dedicator of cytokinesis protein 7;
862	1	UniProt_SwissProt	P70371	40	48706	1	1	1	1	0.1	RecName: Full=Telomeric repeat-binding factor 1; AltName: Full=TTAGGG repeat-binding factor 1;
613	1	UniProt_SwissProt	Q9CZ91	72	48887	2	1	2	1	0.1	RecName: Full=Serum response factor-binding protein 1; AltName: Full=SRF-dependent transcription regulation-associated protein; AltName: Full=p49/STRAP;
762	1	UniProt_SwissProt	Q9D168	51	48994	1	1	1	1	0.1	RecName: Full=Integrator complex subunit 12; Short=Int12; AltName: Full=PHD finger protein 22;
949	1	UniProt_SwissProt	Q6PCM2	31	100168	2	2	2	2	0.1	RecName: Full=Integrator complex subunit 6; Short=Int6; AltName: Full=DBI-1; AltName: Full=Protein DDX26;
903	1	UniProt_SwissProt	Q91V81	37	49958	1	1	1	1	0.1	RecName: Full=RNA-binding protein 42; AltName: Full=RNA-binding motif protein 42;
948	1	UniProt_SwissProt	Q9R099	31	50179	1	1	1	1	0.1	RecName: Full=Transducin beta-like protein 2;
780	1	UniProt_SwissProt	O88708	49	50406	1	1	1	1	0.1	RecName: Full=Origin recognition complex subunit 4;
656	1	UniProt_SwissProt	P56960	64	101620	2	2	2	2	0.1	RecName: Full=Exosome component 10; EC=3.1.13.-; AltName: Full=Autoantigen PM/Scl 2 homolog; AltName: Full=Polymyositis/scleroderma autoantigen 2 homolog;
646	1	UniProt_SwissProt	Q9WUV0	67	50698	2	1	2	1	0.1	RecName: Full=Origin recognition complex subunit 5;
607	1	UniProt_SwissProt	Q61595	73	153068	5	3	5	3	0.1	RecName: Full=Kinectin;
819	1	UniProt_SwissProt	Q9JIM1	45	51014	1	1	1	1	0.1	RecName: Full=Equilibrative nucleoside transporter 1; AltName: Full=Equilibrative nitrobenzylmercaptopurine riboside-sensitive nucleoside transporter; Short=Equilibrative NBMPR-sensitive nucleoside transporter; AltName: Full=Nucleoside transporter, es-type; AltName: Full=Solute carrier family 29 member 1;
734	1	UniProt_SwissProt	Q9DB85	53	51548	1	1	1	1	0.1	RecName: Full=Ribosomal RNA-processing protein 8; EC=2.1.1.-; AltName: Full=Cerebral protein 1 homolog;
964	1	UniProt_SwissProt	Q99JY0	29	51639	1	1	1	1	0.1	RecName: Full=Trifunctional enzyme subunit beta, mitochondrial; AltName: Full=TP-beta; Includes: RecName: Full=3-ketoacyl-CoA thiolase; EC=2.3.1.16; AltName: Full=Acetyl-CoA acyltransferase; AltName: Full=Beta-ketothiolase; Flags: Precursor;
849	1	UniProt_SwissProt	Q99L90	41	51888	1	1	1	1	0.1	RecName: Full=Microspherule protein 1; AltName: Full=58 kDa microspherule protein;
701	1	UniProt_SwissProt	Q80YQ2	58	157925	5	3	5	3	0.09	RecName: Full=Mediator of RNA polymerase II transcription subunit 23; AltName: Full=Cofactor required for Sp1 transcriptional activation subunit 3; Short=CRSP complex subunit 3; AltName: Full=Mediator complex subunit 23; AltName: Full=Protein sur-2 homolog; Short=mSur-2;
755	1	UniProt_SwissProt	O89091	52	52521	2	1	2	1	0.09	RecName: Full=Krueppel-like factor 10; AltName: Full=GDNF-inducible factor; AltName: Full=Transcription factor GIF; Short=mGIF; AltName: Full=Transforming growth factor-beta-inducible early growth response protein 1; Short=TGFB-inducible early growth response protein 1; Short=TIEG-1;
574	1	UniProt_SwissProt	P58501	78	105284	3	2	3	2	0.09	RecName: Full=PAX3- and PAX7-binding protein 1; Short=PAX3/7BP; AltName: Full=GC-rich sequence DNA-binding factor 1;
677	1	UniProt_SwissProt	Q9DBG3	62	105428	5	2	5	2	0.09	RecName: Full=AP-2 complex subunit beta; AltName: Full=AP105B; AltName: Full=Adapter-related protein complex 2 subunit beta; AltName: Full=Adaptor protein complex AP-2 subunit beta; AltName: Full=Beta-2-adaptin; AltName: Full=Beta-adaptin; AltName: Full=Clathrin assembly protein complex 2 beta large chain; AltName: Full=Plasma membrane adaptor HA2/AP2 adaptin beta subunit;
797	1	UniProt_SwissProt	Q3UIK4	47	52717	1	1	1	1	0.09	RecName: Full=Methyltransferase-like protein 14; EC=2.1.1.-;
651	1	UniProt_SwissProt	Q9JI13	66	53424	1	1	1	1	0.09	RecName: Full=Something about silencing protein 10; AltName: Full=Charged amino acid-rich leucine zipper 1; Short=Crl-1; AltName: Full=Disrupter of silencing SAS10; AltName: Full=UTP3 homolog;
374	1	UniProt_SwissProt	Q6ZQ08	132	268975	8	5	8	5	0.09	RecName: Full=CCR4-NOT transcription complex subunit 1; AltName: Full=CCR4-associated factor 1;
465	1	UniProt_SwissProt	Q3UHU5	103	215328	5	4	5	4	0.09	RecName: Full=Protein SOGA2; AltName: Full=Coiled-coil domain-containing protein 165;
708	1	UniProt_SwissProt	Q3TKY6	57	53681	3	1	3	1	0.09	RecName: Full=Peptidyl-prolyl cis-trans isomerase CWC27 homolog; Short=PPIase CWC27; EC=5.2.1.8;
758	1	UniProt_SwissProt	P32037	52	53957	1	1	1	1	0.09	RecName: Full=Solute carrier family 2, facilitated glucose transporter member 3; AltName: Full=Glucose transporter type 3, brain; Short=GLUT-3;
967	1	UniProt_SwissProt	P28658	28	54300	2	1	2	1	0.09	RecName: Full=Ataxin-10; AltName: Full=Brain protein E46; AltName: Full=Spinocerebellar ataxia type 10 protein homolog;
605	1	UniProt_SwissProt	P97449	73	110038	2	2	2	2	0.09	RecName: Full=Aminopeptidase N; Short=AP-N; Short=mAPN; EC=3.4.11.2; AltName: Full=Alanyl aminopeptidase; AltName: Full=Aminopeptidase M; Short=AP-M; AltName: Full=Membrane protein p161; AltName: Full=Microsomal aminopeptidase; AltName: CD_antigen=CD13;
746	1	UniProt_SwissProt	Q61553	52	55215	1	1	1	1	0.09	RecName: Full=Fascin; AltName: Full=Singed-like protein;
942	1	UniProt_SwissProt	Q8BH44	32	55471	4	1	4	1	0.09	RecName: Full=Coronin-2B;
394	1	UniProt_SwissProt	Q99K74	125	111510	2	2	2	2	0.09	RecName: Full=Mediator of RNA polymerase II transcription subunit 24; AltName: Full=Mediator complex subunit 24; AltName: Full=Thyroid hormone receptor-associated protein 4; AltName: Full=Thyroid hormone receptor-associated protein complex 100 kDa component; Short=Trap100; Short=mTRAP100;
414	1	UniProt_SwissProt	Q61687	118	281037	5	5	5	5	0.09	RecName: Full=Transcriptional regulator ATRX; EC=3.6.4.12; AltName: Full=ATP-dependent helicase ATRX; AltName: Full=HP1 alpha-interacting protein; AltName: Full=HP1-BP38 protein; AltName: Full=Heterochromatin protein 2; AltName: Full=X-linked nuclear protein;
312	2	UniProt_SwissProt	Q80YR5	60	112398	2	2	2	2	0.09	RecName: Full=Scaffold attachment factor B2; Short=SAF-B2;
817	1	UniProt_SwissProt	Q99LL5	45	56122	1	1	1	1	0.09	RecName: Full=Periodic tryptophan protein 1 homolog;
933	1	UniProt_SwissProt	Q8BK67	33	56689	1	1	1	1	0.09	RecName: Full=Protein RCC2;
895	1	UniProt_SwissProt	O35608	38	56996	1	1	1	1	0.09	RecName: Full=Angiopoietin-2; Short=ANG-2; Flags: Precursor;
823	1	UniProt_SwissProt	P23249	44	114310	2	2	2	2	0.09	RecName: Full=Putative helicase MOV-10; EC=3.6.4.13; AltName: Full=Moloney leukemia virus 10 protein;
789	1	UniProt_SwissProt	O35841	47	57092	1	1	1	1	0.09	RecName: Full=Apoptosis inhibitor 5; Short=API-5; AltName: Full=AAC-11;
731	1	UniProt_SwissProt	O70310	54	57194	1	1	1	1	0.09	RecName: Full=Glycylpeptide N-tetradecanoyltransferase 1; EC=2.3.1.97; AltName: Full=Myristoyl-CoA:protein N-myristoyltransferase 1; Short=NMT 1; Short=Type I N-myristoyltransferase; AltName: Full=Peptide N-myristoyltransferase 1;
688	1	UniProt_SwissProt	P97386	60	114711	3	2	3	2	0.09	RecName: Full=DNA ligase 3; EC=6.5.1.1; AltName: Full=DNA ligase III; AltName: Full=Polydeoxyribonucleotide synthase [ATP] 3;
947	1	UniProt_SwissProt	P09103	32	57422	1	1	1	1	0.09	RecName: Full=Protein disulfide-isomerase; Short=PDI; EC=5.3.4.1; AltName: Full=Cellular thyroid hormone-binding protein; AltName: Full=Endoplasmic reticulum resident protein 59; Short=ER protein 59; Short=ERp59; AltName: Full=Prolyl 4-hydroxylase subunit beta; AltName: Full=p55; Flags: Precursor;
510	1	UniProt_SwissProt	Q99PL5	92	173232	9	3	8	3	0.09	RecName: Full=Ribosome-binding protein 1; AltName: Full=Ribosome receptor protein; Short=RRp; Short=mRRp;
749	1	UniProt_SwissProt	Q3TJ91	52	115392	2	2	2	2	0.09	RecName: Full=Lethal(2) giant larvae protein homolog 2; AltName: Full=Lethal giant larvae-like protein 2;
906	1	UniProt_SwissProt	Q5XJY5	37	57649	1	1	1	1	0.09	RecName: Full=Coatomer subunit delta; AltName: Full=Archain; AltName: Full=Delta-coat protein; Short=Delta-COP;
582	1	UniProt_SwissProt	Q9D2E2	76	57747	2	1	2	1	0.09	RecName: Full=Target of EGR1 protein 1;
807	1	UniProt_SwissProt	Q9CXG3	45	57708	1	1	1	1	0.09	RecName: Full=Peptidyl-prolyl cis-trans isomerase-like 4; Short=PPIase; EC=5.2.1.8; AltName: Full=Cyclophilin-like protein PPIL4; AltName: Full=Rotamase PPIL4;
960	1	UniProt_SwissProt	Q8R3P6	29	57770	2	1	2	1	0.09	RecName: Full=von Willebrand factor A domain-containing protein 9;
829	1	UniProt_SwissProt	Q8C796	43	58043	2	1	2	1	0.08	RecName: Full=REST corepressor 2; AltName: Full=M-CoREST;
902	1	UniProt_SwissProt	P10852	37	58414	2	1	2	1	0.08	RecName: Full=4F2 cell-surface antigen heavy chain; Short=4F2hc; AltName: Full=Solute carrier family 3 member 2; AltName: CD_antigen=CD98;
785	1	UniProt_SwissProt	P57016	48	58886	3	1	3	1	0.08	RecName: Full=Ladinin-1; Short=Lad-1; AltName: Full=Linear IgA disease antigen homolog; Short=LADA;
874	1	UniProt_SwissProt	Q8K1N4	40	59319	1	1	1	1	0.08	RecName: Full=Spermatogenesis-associated serine-rich protein 2; AltName: Full=Serine-rich spermatocytes and round spermatid 59 kDa protein; AltName: Full=p59scr;
957	1	UniProt_SwissProt	Q8BHY2	29	59266	1	1	1	1	0.08	RecName: Full=Nucleolar complex protein 4 homolog; Short=NOC4 protein homolog; AltName: Full=NOC4-like protein; AltName: Full=Nucleolar complex-associated protein 4-like protein;
713	1	UniProt_SwissProt	Q5SFM8	56	118935	2	2	2	2	0.08	RecName: Full=RNA-binding protein 27; AltName: Full=Peri-implantation stem cell protein 1; AltName: Full=RNA-binding motif protein 27;
864	1	UniProt_SwissProt	Q9D787	40	59541	1	1	1	1	0.08	RecName: Full=Peptidyl-prolyl cis-trans isomerase-like 2; Short=PPIase; EC=5.2.1.8; AltName: Full=Cyclophilin-60; AltName: Full=Cyclophilin-like protein Cyp-60; AltName: Full=Rotamase PPIL2;
846	1	UniProt_SwissProt	Q8C7V3	42	59737	1	1	1	1	0.08	RecName: Full=U3 small nucleolar RNA-associated protein 15 homolog; AltName: Full=Src-associated protein SAW;
911	1	UniProt_SwissProt	Q8C5L3	36	59844	1	1	1	1	0.08	RecName: Full=CCR4-NOT transcription complex subunit 2; AltName: Full=CCR4-associated factor 2;
815	1	UniProt_SwissProt	P80313	45	60127	1	1	1	1	0.08	RecName: Full=T-complex protein 1 subunit eta; Short=TCP-1-eta; AltName: Full=CCT-eta;
606	1	UniProt_SwissProt	Q922P9	73	60248	1	1	1	1	0.08	RecName: Full=Putative oxidoreductase GLYR1; EC=1.-.-.-; AltName: Full=Glyoxylate reductase 1 homolog; AltName: Full=Nuclear protein NP60;
732	1	UniProt_SwissProt	Q52KE7	54	60496	1	1	1	1	0.08	RecName: Full=Cyclin-L1; Short=Cyclin-L; AltName: Full=Cyclin Ania-6a;
884	1	UniProt_SwissProt	Q9QZ82	39	60447	2	1	2	1	0.08	RecName: Full=Cholesterol side-chain cleavage enzyme, mitochondrial; EC=1.14.15.6; AltName: Full=CYPXIA1; AltName: Full=Cholesterol desmolase; AltName: Full=Cytochrome P450 11A1; AltName: Full=Cytochrome P450(scc); Flags: Precursor;
826	1	UniProt_SwissProt	O35345	44	60668	2	1	2	1	0.08	RecName: Full=Importin subunit alpha-7; AltName: Full=Importin alpha-S2; AltName: Full=Karyopherin subunit alpha-6;
683	1	UniProt_SwissProt	Q8CCP0	60	121739	3	2	3	2	0.08	RecName: Full=Nuclear export mediator factor Nemf; AltName: Full=Serologically defined colon cancer antigen 1 homolog;
742	1	UniProt_SwissProt	P11983	53	60867	2	1	2	1	0.08	RecName: Full=T-complex protein 1 subunit alpha; Short=TCP-1-alpha; AltName: Full=CCT-alpha; AltName: Full=Tailless complex polypeptide 1A; Short=TCP-1-A; AltName: Full=Tailless complex polypeptide 1B; Short=TCP-1-B;
412	1	UniProt_SwissProt	Q8K4L3	119	244551	4	4	4	4	0.08	RecName: Full=Supervillin; AltName: Full=Archvillin; AltName: Full=p205/p250;
370	1	UniProt_SwissProt	A2AGH6	134	247144	7	4	7	4	0.08	RecName: Full=Mediator of RNA polymerase II transcription subunit 12; AltName: Full=Mediator complex subunit 12; AltName: Full=OPA-containing protein; AltName: Full=Thyroid hormone receptor-associated protein complex 230 kDa component; Short=Trap230; AltName: Full=Trinucleotide repeat-containing gene 11 protein;
773	1	UniProt_SwissProt	P26443	50	61640	1	1	1	1	0.08	RecName: Full=Glutamate dehydrogenase 1, mitochondrial; Short=GDH 1; EC=1.4.1.3; Flags: Precursor;
602	1	UniProt_SwissProt	O88874	74	61723	1	1	1	1	0.08	RecName: Full=Cyclin-K;
541	1	UniProt_SwissProt	Q8CGF7	83	123938	5	2	5	2	0.08	RecName: Full=Transcription elongation regulator 1; AltName: Full=Formin-binding protein 28; Short=FBP 28; AltName: Full=TATA box-binding protein-associated factor 2S; AltName: Full=Transcription factor CA150; AltName: Full=p144;
675	1	UniProt_SwissProt	Q6P5F9	62	124153	2	2	2	2	0.08	RecName: Full=Exportin-1; Short=Exp1; AltName: Full=Chromosome region maintenance 1 protein homolog;
666	1	UniProt_SwissProt	Q9DBA9	63	62155	1	1	1	1	0.08	RecName: Full=General transcription factor IIH subunit 1; AltName: Full=Basic transcription factor 2 62 kDa subunit; Short=BTF2 p62; AltName: Full=General transcription factor IIH polypeptide 1; AltName: Full=TFIIH basal transcription factor complex p62 subunit;
813	1	UniProt_SwissProt	Q9EPU0	45	125200	3	2	3	2	0.08	RecName: Full=Regulator of nonsense transcripts 1; EC=3.6.4.-; AltName: Full=ATP-dependent helicase RENT1; AltName: Full=Nonsense mRNA reducing factor 1; Short=NORF1; AltName: Full=Up-frameshift suppressor 1 homolog; Short=mUpf1;
900	1	UniProt_SwissProt	Q9CZX0	37	62915	1	1	1	1	0.08	RecName: Full=Elongator complex protein 3; EC=2.3.1.48;
739	1	UniProt_SwissProt	E9Q634	53	127365	3	2	3	2	0.08	RecName: Full=Unconventional myosin-Ie; AltName: Full=Unconventional myosin 1E;
649	1	UniProt_SwissProt	Q9WVM3	66	63608	1	1	1	1	0.08	RecName: Full=Anaphase-promoting complex subunit 7; Short=APC7; AltName: Full=Cyclosome subunit 7; AltName: Full=Prediabetic NOD sera-reactive autoantigen;
643	1	UniProt_SwissProt	Q924W7	67	127979	5	2	5	2	0.08	RecName: Full=Suppression of tumorigenicity 5 protein; AltName: Full=DENN domain-containing protein 2B;
654	1	UniProt_SwissProt	Q571H0	65	256562	7	4	7	4	0.08	RecName: Full=Nucleolar pre-ribosomal-associated protein 1; AltName: Full=URB1 ribosome biogenesis 1 homolog;
222	1	UniProt_SwissProt	Q9QXZ0	211	836893	23	13	22	13	0.08	RecName: Full=Microtubule-actin cross-linking factor 1; AltName: Full=Actin cross-linking family 7;
714	1	UniProt_SwissProt	Q8R0X7	56	64263	2	1	2	1	0.08	RecName: Full=Sphingosine-1-phosphate lyase 1; Short=S1PL; Short=SP-lyase 1; Short=SPL 1; Short=mSPL; EC=4.1.2.27; AltName: Full=Sphingosine-1-phosphate aldolase;
950	1	UniProt_SwissProt	Q921F4	31	64940	1	1	1	1	0.08	RecName: Full=Heterogeneous nuclear ribonucleoprotein L-like;
693	1	UniProt_SwissProt	O88291	59	65641	1	1	1	1	0.07	RecName: Full=DBIRD complex subunit ZNF326; AltName: Full=Zinc finger protein 326; AltName: Full=Zinc finger protein interacting with mRNPs; AltName: Full=Zinc finger protein-associated with nuclear matrix of 75 kDa;
517	1	UniProt_SwissProt	Q8C0T5	90	198106	7	3	7	3	0.07	RecName: Full=Signal-induced proliferation-associated 1-like protein 1; Short=SIPA1-like protein 1;
761	1	UniProt_SwissProt	Q60862	51	65967	1	1	1	1	0.07	RecName: Full=Origin recognition complex subunit 2;
747	1	UniProt_SwissProt	Q8CFZ4	52	66372	1	1	1	1	0.07	RecName: Full=Glypican-3; Contains: RecName: Full=Secreted glypican-3; Flags: Precursor;
941	1	UniProt_SwissProt	P33896	32	66723	1	1	1	1	0.07	RecName: Full=Interferon alpha/beta receptor 1; Short=IFN-R-1; Short=IFN-alpha/beta receptor 1; AltName: Full=Type I interferon receptor 1; Flags: Precursor;
753	1	UniProt_SwissProt	Q80UK8	52	135254	5	2	5	2	0.07	RecName: Full=Integrator complex subunit 2; Short=Int2;
977	1	UniProt_SwissProt	P35564	25	67635	2	1	2	1	0.07	RecName: Full=Calnexin; Flags: Precursor;
632	1	UniProt_SwissProt	Q8BMB0	69	135550	2	2	2	2	0.07	RecName: Full=Protein EMSY;
474	1	UniProt_SwissProt	P02469	100	204203	4	3	4	3	0.07	RecName: Full=Laminin subunit beta-1; AltName: Full=Laminin B1 chain; AltName: Full=Laminin-1 subunit beta; AltName: Full=Laminin-10 subunit beta; AltName: Full=Laminin-12 subunit beta; AltName: Full=Laminin-2 subunit beta; AltName: Full=Laminin-6 subunit beta; AltName: Full=Laminin-8 subunit beta; Flags: Precursor;
875	1	UniProt_SwissProt	Q9EQ61	40	68209	1	1	1	1	0.07	RecName: Full=Pescadillo homolog;
702	1	UniProt_SwissProt	Q99MN1	58	68253	1	1	1	1	0.07	RecName: Full=Lysine--tRNA ligase; EC=6.1.1.6; AltName: Full=Lysyl-tRNA synthetase; Short=LysRS;
898	1	UniProt_SwissProt	Q80US4	37	68315	3	1	3	1	0.07	RecName: Full=Actin-related protein 5;
922	1	UniProt_SwissProt	Q8CIB9	35	68314	1	1	1	1	0.07	RecName: Full=N-acetyltransferase ESCO2; EC=2.3.1.-; AltName: Full=Establishment of cohesion 1 homolog 2; Short=ECO1 homolog 2;
917	1	UniProt_SwissProt	Q9CWS4	36	68541	2	1	2	1	0.07	RecName: Full=Integrator complex subunit 11; Short=Int11; EC=3.1.27.-; AltName: Full=Cleavage and polyadenylation-specific factor 3-like protein; Short=CPSF3-like protein;
852	1	UniProt_SwissProt	Q9CRC8	41	68546	1	1	1	1	0.07	RecName: Full=Leucine-rich repeat-containing protein 40;
886	1	UniProt_SwissProt	Q07832	39	68999	1	1	1	1	0.07	RecName: Full=Serine/threonine-protein kinase PLK1; EC=2.7.11.21; AltName: Full=Polo-like kinase 1; Short=PLK-1; AltName: Full=Serine/threonine-protein kinase 13; Short=STPK13;
812	1	UniProt_SwissProt	Q8BGZ4	45	69316	2	1	2	1	0.07	RecName: Full=Cell division cycle protein 23 homolog; AltName: Full=Anaphase-promoting complex subunit 8; Short=APC8; AltName: Full=Cyclosome subunit 8;
501	1	UniProt_SwissProt	Q62315	93	139013	3	2	3	2	0.07	RecName: Full=Protein Jumonji; AltName: Full=Jumonji/ARID domain-containing protein 2;
482	1	UniProt_SwissProt	Q6PIJ4	97	139134	3	2	3	2	0.07	RecName: Full=Nuclear factor related to kappa-B-binding protein; AltName: Full=DNA-binding protein R kappa-B;
704	1	UniProt_SwissProt	Q6NS46	58	209302	6	3	6	3	0.07	RecName: Full=Protein RRP5 homolog; AltName: Full=Apoptosis-linked gene 4 protein; AltName: Full=Programmed cell death protein 11;
684	1	UniProt_SwissProt	Q923D5	60	69831	2	1	2	1	0.07	RecName: Full=WW domain-binding protein 11; Short=WBP-11; AltName: Full=Splicing factor that interacts with PQBP-1 and PP1;
548	1	UniProt_SwissProt	O88466	82	210831	3	3	3	3	0.07	RecName: Full=Zinc finger protein 106; Short=Zfp-106; AltName: Full=H3a minor histocompatibility antigen; AltName: Full=Son of insulin receptor mutant; AltName: Full=Zinc finger protein 474;
913	1	UniProt_SwissProt	Q8BZR9	36	70171	2	1	2	1	0.07	RecName: Full=Uncharacterized protein C17orf85 homolog;
915	1	UniProt_SwissProt	Q9JLQ0	36	70578	1	1	1	1	0.07	RecName: Full=CD2-associated protein; AltName: Full=Mesenchyme-to-epithelium transition protein with SH3 domains 1; Short=METS-1;
511	1	UniProt_SwissProt	P07724	92	70700	1	1	1	1	0.07	RecName: Full=Serum albumin; Flags: Precursor;
953	1	UniProt_SwissProt	Q9WVM1	30	70856	2	1	2	1	0.07	RecName: Full=Rac GTPase-activating protein 1; AltName: Full=Male germ cell RacGap; Short=MgcRacGAP;
894	1	UniProt_SwissProt	Q7M6Y3	38	71669	1	1	1	1	0.07	RecName: Full=Phosphatidylinositol-binding clathrin assembly protein; AltName: Full=Clathrin assembly lymphoid myeloid leukemia; Short=CALM;
801	1	UniProt_SwissProt	Q9CU62	46	143773	2	2	2	2	0.07	RecName: Full=Structural maintenance of chromosomes protein 1A; Short=SMC protein 1A; Short=SMC-1-alpha; Short=SMC-1A; AltName: Full=Chromosome segregation protein SmcB; AltName: Full=Sb1.8;
858	1	UniProt_SwissProt	Q3U9G9	41	71965	1	1	1	1	0.07	RecName: Full=Lamin-B receptor; AltName: Full=Integral nuclear envelope inner membrane protein;
809	1	UniProt_SwissProt	Q8R349	45	72213	2	1	2	1	0.07	RecName: Full=Cell division cycle protein 16 homolog; AltName: Full=Anaphase-promoting complex subunit 6; Short=APC6; AltName: Full=Cyclosome subunit 6;
843	1	UniProt_SwissProt	Q61550	42	72323	1	1	1	1	0.07	RecName: Full=Double-strand-break repair protein rad21 homolog; AltName: Full=Pokeweed agglutinin-binding protein 29; Short=PW29; AltName: Full=SCC1 homolog;
814	1	UniProt_SwissProt	Q8VCD5	45	72930	2	1	2	1	0.07	RecName: Full=Mediator of RNA polymerase II transcription subunit 17; AltName: Full=Cofactor required for Sp1 transcriptional activation subunit 6; Short=CRSP complex subunit 6; AltName: Full=Mediator complex subunit 17; AltName: Full=Thyroid hormone receptor-associated protein complex 80 kDa component;
845	1	UniProt_SwissProt	Q8JZP9	42	72937	1	1	1	1	0.07	RecName: Full=GAS2-like protein 1; AltName: Full=Growth arrest-specific protein 2-like 1;
921	1	UniProt_SwissProt	Q9WUU9	35	219450	5	3	5	3	0.07	RecName: Full=Germinal-center associated nuclear protein; Short=GANP; AltName: Full=GC-associated DNA primase;
879	1	UniProt_SwissProt	Q8BKS9	39	73153	1	1	1	1	0.07	RecName: Full=Pumilio domain-containing protein KIAA0020;
842	1	UniProt_SwissProt	Q3V300	42	73430	4	1	4	1	0.07	RecName: Full=Kinesin-like protein KIF22;
614	1	UniProt_SwissProt	Q921G6	71	73859	1	1	1	1	0.07	RecName: Full=Leucine-rich repeat and calponin homology domain-containing protein 4;
711	1	UniProt_SwissProt	Q8K114	56	75056	1	1	1	1	0.06	RecName: Full=Integrator complex subunit 9; Short=Int9;
15	3	UniProt_SwissProt	Q6URW6	104	229359	5	3	5	3	0.06	RecName: Full=Myosin-14; AltName: Full=Myosin heavy chain 14; AltName: Full=Myosin heavy chain, non-muscle IIc; AltName: Full=Non-muscle myosin heavy chain IIc; Short=NMHC II-C;
907	1	UniProt_SwissProt	Q3US41	36	76356	1	1	1	1	0.06	RecName: Full=Epithelial splicing regulatory protein 1; AltName: Full=RNA-binding motif protein 35A; AltName: Full=RNA-binding protein 35A;
558	1	UniProt_SwissProt	Q8BM55	80	77407	1	1	1	1	0.06	RecName: Full=Transmembrane protein 214;
880	1	UniProt_SwissProt	O54781	39	77393	2	1	2	1	0.06	RecName: Full=SRSF protein kinase 2; EC=2.7.11.1; AltName: Full=SFRS protein kinase 2; AltName: Full=Serine/arginine-rich protein-specific kinase 2; Short=SR-protein-specific kinase 2; Contains: RecName: Full=SRSF protein kinase 2 N-terminal; Contains: RecName: Full=SRSF protein kinase 2 C-terminal;
532	1	UniProt_SwissProt	Q99P88	86	156559	3	2	3	2	0.06	RecName: Full=Nuclear pore complex protein Nup155; AltName: Full=155 kDa nucleoporin; AltName: Full=Nucleoporin Nup155;
897	1	UniProt_SwissProt	Q14C51	38	78317	1	1	1	1	0.06	RecName: Full=Pentatricopeptide repeat domain-containing protein 3, mitochondrial; AltName: Full=28S ribosomal protein S39, mitochondrial; Short=MRP-S39; Flags: Precursor;
876	1	UniProt_SwissProt	Q9QYB5	40	79070	1	1	1	1	0.06	RecName: Full=Gamma-adducin; AltName: Full=Adducin-like protein 70;
802	1	UniProt_SwissProt	Q80VY9	46	79095	4	1	4	1	0.06	RecName: Full=Putative ATP-dependent RNA helicase DHX33; EC=3.6.4.13; AltName: Full=DEAH box protein 33;
928	1	UniProt_SwissProt	P51660	33	79945	1	1	1	1	0.06	RecName: Full=Peroxisomal multifunctional enzyme type 2; Short=MFE-2; AltName: Full=17-beta-hydroxysteroid dehydrogenase 4; Short=17-beta-HSD 4; AltName: Full=D-bifunctional protein; Short=DBP; AltName: Full=Multifunctional protein 2; Short=MPF-2; Contains: RecName: Full=(3R)-hydroxyacyl-CoA dehydrogenase; EC=1.1.1.n12; Contains: RecName: Full=Enoyl-CoA hydratase 2; EC=4.2.1.107; EC=4.2.1.119; Al…
267	2	UniProt_SwissProt	Q8CGB3	34	161969	3	2	3	2	0.06	RecName: Full=Uveal autoantigen with coiled-coil domains and ankyrin repeats; AltName: Full=Nuclear membrane-binding protein; Short=Nucling;
681	1	UniProt_SwissProt	Q9QWV9	61	80890	1	1	1	1	0.06	RecName: Full=Cyclin-T1; Short=CycT1; Short=Cyclin-T;
748	1	UniProt_SwissProt	A2ABV5	52	162346	2	2	2	2	0.06	RecName: Full=Mediator of RNA polymerase II transcription subunit 14; AltName: Full=Cofactor required for Sp1 transcriptional activation subunit 2; Short=CRSP complex subunit 2; AltName: Full=Mediator complex subunit 14; AltName: Full=Thyroid hormone receptor-associated protein complex 170 kDa component; Short=Trap170;
671	1	UniProt_SwissProt	O89090	63	81310	1	1	1	1	0.06	RecName: Full=Transcription factor Sp1;
767	1	UniProt_SwissProt	Q80YS6	51	81420	2	1	2	1	0.06	RecName: Full=Actin filament-associated protein 1; AltName: Full=110 kDa actin filament-associated protein; Short=AFAP-110;
608	1	UniProt_SwissProt	Q6A0A2	73	82033	1	1	1	1	0.06	RecName: Full=La-related protein 4B; AltName: Full=La ribonucleoprotein domain family member 4B; AltName: Full=La ribonucleoprotein domain family member 5; AltName: Full=La-related protein 5;
728	1	UniProt_SwissProt	A2ALU4	55	165971	2	2	2	2	0.06	RecName: Full=Protein Shroom2; AltName: Full=Protein Apxl;
820	1	UniProt_SwissProt	Q8BJ05	44	83326	1	1	1	1	0.06	RecName: Full=Zinc finger CCCH domain-containing protein 14;
463	1	UniProt_SwissProt	Q99LH1	104	83579	1	1	1	1	0.06	RecName: Full=Nucleolar GTP-binding protein 2;
699	1	UniProt_SwissProt	P63154	58	83649	1	1	1	1	0.06	RecName: Full=Crooked neck-like protein 1; AltName: Full=Crooked neck homolog;
961	1	UniProt_SwissProt	Q80U70	29	83715	2	1	2	1	0.06	RecName: Full=Polycomb protein Suz12; AltName: Full=Suppressor of zeste 12 protein homolog;
861	1	UniProt_SwissProt	Q8QZV7	40	83754	4	1	4	1	0.06	RecName: Full=Protein asunder homolog; AltName: Full=Cell cycle regulator Mat89Bb homolog; AltName: Full=Spermatogenesis-associated protein 30;
621	1	UniProt_SwissProt	Q8CGC6	70	84675	1	1	1	1	0.06	RecName: Full=RNA-binding protein 28; AltName: Full=RNA-binding motif protein 28;
899	1	UniProt_SwissProt	Q8C1D8	37	85368	1	1	1	1	0.06	RecName: Full=Protein IWS1 homolog; AltName: Full=IWS1-like protein;
787	1	UniProt_SwissProt	Q8CFQ3	48	171440	3	2	3	2	0.06	RecName: Full=Intron-binding protein aquarius;
839	1	UniProt_SwissProt	O70445	42	85683	1	1	1	1	0.06	RecName: Full=BRCA1-associated RING domain protein 1; Short=BARD-1; EC=6.3.2.-;
565	1	UniProt_SwissProt	Q8CGC7	79	171739	2	2	2	2	0.06	RecName: Full=Bifunctional glutamate/proline--tRNA ligase; AltName: Full=Bifunctional aminoacyl-tRNA synthetase; Includes: RecName: Full=Glutamate--tRNA ligase; EC=6.1.1.17; AltName: Full=Glutamyl-tRNA synthetase; Short=GluRS; Includes: RecName: Full=Proline--tRNA ligase; EC=6.1.1.15; AltName: Full=Prolyl-tRNA synthetase; Short=ProRS;
916	1	UniProt_SwissProt	Q921N6	36	86284	2	1	2	1	0.06	RecName: Full=Probable ATP-dependent RNA helicase DDX27; EC=3.6.4.13; AltName: Full=DEAD box protein 27;
593	1	UniProt_SwissProt	Q05512	75	86651	2	1	2	1	0.06	RecName: Full=Serine/threonine-protein kinase MARK2; EC=2.7.11.1; EC=2.7.11.26; AltName: Full=ELKL motif kinase 1; Short=EMK-1; AltName: Full=MAP/microtubule affinity-regulating kinase 2; AltName: Full=PAR1 homolog; AltName: Full=PAR1 homolog b; Short=Par-1b; Short=mPar-1b;
612	1	UniProt_SwissProt	Q8CBY3	72	87568	2	1	2	1	0.06	RecName: Full=Leukocyte receptor cluster member 8 homolog;
794	1	UniProt_SwissProt	Q8K327	47	88703	3	1	3	1	0.05	RecName: Full=Chromosome alignment-maintaining phosphoprotein 1; AltName: Full=Zinc finger protein 828;
877	1	UniProt_SwissProt	Q6PFX7	39	88640	1	1	1	1	0.05	RecName: Full=Neuronal tyrosine-phosphorylated phosphoinositide-3-kinase adapter 1;
840	1	UniProt_SwissProt	A2AR02	42	88785	3	1	3	1	0.05	RecName: Full=Peptidyl-prolyl cis-trans isomerase G; Short=PPIase G; Short=Peptidyl-prolyl isomerase G; EC=5.2.1.8; AltName: Full=Cyclophilin G; AltName: Full=Rotamase G;
896	1	UniProt_SwissProt	Q8C4J7	38	89579	1	1	1	1	0.05	RecName: Full=Transducin beta-like protein 3;
727	1	UniProt_SwissProt	Q01853	55	89950	2	1	2	1	0.05	RecName: Full=Transitional endoplasmic reticulum ATPase; Short=TER ATPase; EC=3.6.4.6; AltName: Full=15S Mg(2+)-ATPase p97 subunit; AltName: Full=Valosin-containing protein; Short=VCP;
528	1	UniProt_SwissProt	Q9WTQ5	87	181156	2	2	2	2	0.05	RecName: Full=A-kinase anchor protein 12; Short=AKAP-12; AltName: Full=Germ cell lineage protein gercelin; AltName: Full=Src-suppressed C kinase substrate; Short=SSeCKS;
958	1	UniProt_SwissProt	Q3U829	29	90604	1	1	1	1	0.05	RecName: Full=AP-5 complex subunit zeta-1; AltName: Full=Adapter-related protein complex 5 zeta subunit; Short=Zeta5;
944	1	UniProt_SwissProt	Q9JLF6	32	90682	1	1	1	1	0.05	RecName: Full=Protein-glutamine gamma-glutamyltransferase K; EC=2.3.2.13; AltName: Full=Epidermal TGase; AltName: Full=Transglutaminase K; Short=TG(K); Short=TGK; Short=TGase K; AltName: Full=Transglutaminase-1; Short=TGase-1;
927	1	UniProt_SwissProt	Q9D5V5	33	91486	1	1	1	1	0.05	RecName: Full=Cullin-5; Short=CUL-5;
935	1	UniProt_SwissProt	Q91W96	33	92448	1	1	1	1	0.05	RecName: Full=Anaphase-promoting complex subunit 4; Short=APC4; AltName: Full=Cyclosome subunit 4;
718	1	UniProt_SwissProt	P13864	56	185411	3	2	3	2	0.05	RecName: Full=DNA (cytosine-5)-methyltransferase 1; Short=Dnmt1; Short=Met-1; EC=2.1.1.37; AltName: Full=DNA methyltransferase MmuI; Short=DNA MTase MmuI; Short=M.MmuI; AltName: Full=MCMT;
793	1	UniProt_SwissProt	Q8BMQ2	47	92866	1	1	1	1	0.05	RecName: Full=General transcription factor 3C polypeptide 4; EC=2.3.1.48; AltName: Full=TF3C-delta; AltName: Full=Transcription factor IIIC 90 kDa subunit; Short=TFIIIC 90 kDa subunit; Short=TFIIIC90; AltName: Full=Transcription factor IIIC subunit delta;
832	1	UniProt_SwissProt	Q9Z103	43	92917	2	1	2	1	0.05	RecName: Full=Activity-dependent neuroprotector homeobox protein; AltName: Full=Activity-dependent neuroprotective protein;
827	1	UniProt_SwissProt	Q1PSW8	43	93422	1	1	1	1	0.05	RecName: Full=E3 ubiquitin-protein ligase TRIM71; EC=6.3.2.-; AltName: Full=Protein lin-41 homolog; Short=mLin41; AltName: Full=Tripartite motif-containing protein 71;
664	1	UniProt_SwissProt	Q3UVG3	63	94146	1	1	1	1	0.05	RecName: Full=Protein FAM91A1;
973	1	UniProt_SwissProt	Q61316	26	94872	1	1	1	1	0.05	RecName: Full=Heat shock 70 kDa protein 4; AltName: Full=Heat shock 70-related protein APG-2;
920	1	UniProt_SwissProt	Q9ERA6	35	96529	3	1	3	1	0.05	RecName: Full=Tuftelin-interacting protein 11; AltName: Full=Septin and tuftelin-interacting protein 1; Short=STIP-1; AltName: Full=Tuftelin-interacting protein 39;
952	1	UniProt_SwissProt	A2RSY1	31	96702	1	1	1	1	0.05	RecName: Full=KAT8 regulatory NSL complex subunit 3; AltName: Full=NSL complex protein NSL3; AltName: Full=Non-specific lethal 3 homolog;
887	1	UniProt_SwissProt	Q9ESV0	38	97053	3	1	3	1	0.05	RecName: Full=ATP-dependent RNA helicase DDX24; EC=3.6.4.13; AltName: Full=DEAD box protein 24;
914	1	UniProt_SwissProt	Q99LI5	36	97366	2	1	2	1	0.05	RecName: Full=Zinc finger protein 281;
770	1	UniProt_SwissProt	Q8K4L0	50	98029	2	1	2	1	0.05	RecName: Full=ATP-dependent RNA helicase DDX54; EC=3.6.4.13; AltName: Full=DEAD box protein 54;
974	1	UniProt_SwissProt	Q8K4G5	26	98625	1	1	1	1	0.05	RecName: Full=Actin-binding LIM protein 1; Short=abLIM-1; AltName: Full=Actin-binding LIM protein family member 1;
936	1	UniProt_SwissProt	P09803	32	98708	1	1	1	1	0.05	RecName: Full=Cadherin-1; AltName: Full=ARC-1; AltName: Full=Epithelial cadherin; Short=E-cadherin; AltName: Full=Uvomorulin; AltName: CD_antigen=CD324; Contains: RecName: Full=E-Cad/CTF1; Contains: RecName: Full=E-Cad/CTF2; Contains: RecName: Full=E-Cad/CTF3; Flags: Precursor;
885	1	UniProt_SwissProt	Q9DBH0	39	99269	1	1	1	1	0.05	RecName: Full=NEDD4-like E3 ubiquitin-protein ligase WWP2; EC=6.3.2.-; AltName: Full=WW domain-containing protein 2;
768	1	UniProt_SwissProt	Q9DCD2	50	100723	2	1	2	1	0.05	RecName: Full=Pre-mRNA-splicing factor SYF1; AltName: Full=XPA-binding protein 2;
455	1	UniProt_SwissProt	P48754	106	201750	2	2	2	2	0.05	RecName: Full=Breast cancer type 1 susceptibility protein homolog; EC=6.3.2.-;
945	1	UniProt_SwissProt	Q8BL74	32	101295	1	1	1	1	0.05	RecName: Full=General transcription factor 3C polypeptide 2; AltName: Full=TF3C-beta; AltName: Full=Transcription factor IIIC 110 kDa subunit; Short=TFIIIC 110 kDa subunit; Short=TFIIIC110; AltName: Full=Transcription factor IIIC subunit beta;
816	1	UniProt_SwissProt	Q80YR6	45	102023	1	1	1	1	0.05	RecName: Full=DNA endonuclease RBBP8; EC=3.1.-.-; AltName: Full=CtBP-interacting protein; Short=CtIP; AltName: Full=Retinoblastoma-binding protein 8; Short=RBBP-8; AltName: Full=Retinoblastoma-interacting protein and myosin-like; Short=RIM; AltName: Full=Sporulation in the absence of SPO11 protein 2 homolog; Short=SAE2;
685	1	UniProt_SwissProt	O55029	60	103240	1	1	1	1	0.05	RecName: Full=Coatomer subunit beta'; AltName: Full=Beta'-coat protein; Short=Beta'-COP; AltName: Full=p102;
847	1	UniProt_SwissProt	Q8BU03	41	103814	2	1	2	1	0.05	RecName: Full=Periodic tryptophan protein 2 homolog;
825	1	UniProt_SwissProt	Q8C052	44	103902	1	1	1	1	0.05	RecName: Full=Microtubule-associated protein 1S; Short=MAP-1S; AltName: Full=BPY2-interacting protein 1; AltName: Full=Microtubule-associated protein 8; Contains: RecName: Full=MAP1S heavy chain; Contains: RecName: Full=MAP1S light chain;
882	1	UniProt_SwissProt	P43247	39	104884	1	1	1	1	0.05	RecName: Full=DNA mismatch repair protein Msh2; AltName: Full=MutS protein homolog 2;
853	1	UniProt_SwissProt	Q99N50	41	107196	2	1	1	1	0.05	RecName: Full=Synaptotagmin-like protein 2; AltName: Full=Exophilin-4;
533	1	UniProt_SwissProt	A2ASQ1	86	215386	3	2	3	2	0.04	RecName: Full=Agrin; Contains: RecName: Full=Agrin N-terminal 110 kDa subunit; Contains: RecName: Full=Agrin C-terminal 110 kDa subunit; Contains: RecName: Full=Agrin C-terminal 90 kDa fragment; Short=C90; Contains: RecName: Full=Agrin C-terminal 22 kDa fragment; Short=C22;
946	1	UniProt_SwissProt	Q7TQK1	32	108048	4	1	4	1	0.04	RecName: Full=Integrator complex subunit 7; Short=Int7;
724	1	UniProt_SwissProt	Q8CIM8	55	109093	3	1	3	1	0.04	RecName: Full=Integrator complex subunit 4; Short=Int4;
635	1	UniProt_SwissProt	O35382	68	111273	1	1	1	1	0.04	RecName: Full=Exocyst complex component 4; AltName: Full=Exocyst complex component Sec8;
848	1	UniProt_SwissProt	Q8BIH0	41	111330	1	1	1	1	0.04	RecName: Full=Histone deacetylase complex subunit SAP130; AltName: Full=130 kDa Sin3-associated polypeptide; AltName: Full=Sin3-associated polypeptide p130;
410	1	UniProt_SwissProt	Q7TSC1	120	229633	3	2	3	2	0.04	RecName: Full=Protein PRRC2A; AltName: Full=HLA-B-associated transcript 2; AltName: Full=Proline-rich and coiled-coil-containing protein 2A;
722	1	UniProt_SwissProt	Q80V86	55	114820	1	1	1	1	0.04	RecName: Full=Integrator complex subunit 8; Short=Int8;
881	1	UniProt_SwissProt	Q80U58	39	114813	1	1	1	1	0.04	RecName: Full=Pumilio homolog 2;
730	1	UniProt_SwissProt	Q04692	54	117347	1	1	1	1	0.04	RecName: Full=SWI/SNF-related matrix-associated actin-dependent regulator of chromatin subfamily A containing DEAD/H box 1; EC=3.6.4.12; AltName: Full=ATP-dependent helicase SMARCAD1; AltName: Full=Enhancer trap locus homolog 1; Short=Etl-1;
865	1	UniProt_SwissProt	Q61136	40	117304	2	1	2	1	0.04	RecName: Full=Serine/threonine-protein kinase PRP4 homolog; EC=2.7.11.1; AltName: Full=PRP4 pre-mRNA-processing factor 4 homolog; AltName: Full=Pre-mRNA protein kinase;
956	1	UniProt_SwissProt	Q60597	29	117572	1	1	1	1	0.04	RecName: Full=2-oxoglutarate dehydrogenase, mitochondrial; EC=1.2.4.2; AltName: Full=2-oxoglutarate dehydrogenase complex component E1; Short=OGDC-E1; AltName: Full=Alpha-ketoglutarate dehydrogenase; Flags: Precursor;
469	1	UniProt_SwissProt	P60330	102	236765	3	2	3	2	0.04	RecName: Full=Separin; EC=3.4.22.49; AltName: Full=Caspase-like protein ESPL1; AltName: Full=Extra spindle poles-like 1 protein; AltName: Full=Separase;
495	1	UniProt_SwissProt	P49025	94	237294	5	2	5	2	0.04	RecName: Full=Citron Rho-interacting kinase; Short=CRIK; EC=2.7.11.1; AltName: Full=Rho-interacting, serine/threonine-protein kinase 21;
774	1	UniProt_SwissProt	Q5SXY1	50	118713	3	1	3	1	0.04	RecName: Full=Cytospin-B; AltName: Full=Sperm antigen with calponin homology and coiled-coil domains 1;
792	1	UniProt_SwissProt	Q6NZM9	47	119287	1	1	1	1	0.04	RecName: Full=Histone deacetylase 4; Short=HD4; EC=3.5.1.98;
659	1	UniProt_SwissProt	Q8K284	64	239949	3	2	3	2	0.04	RecName: Full=General transcription factor 3C polypeptide 1; AltName: Full=TF3C-alpha; AltName: Full=TFIIIC box B-binding subunit; AltName: Full=Transcription factor IIIC 220 kDa subunit; Short=TFIIIC 220 kDa subunit; Short=TFIIIC220; AltName: Full=Transcription factor IIIC subunit alpha;
514	1	UniProt_SwissProt	B1AQJ2	91	121036	1	1	1	1	0.04	RecName: Full=Ubiquitin carboxyl-terminal hydrolase 36; EC=3.4.19.12; AltName: Full=Deubiquitinating enzyme 36; AltName: Full=Ubiquitin thioesterase 36; AltName: Full=Ubiquitin-specific-processing protease 36;
776	1	UniProt_SwissProt	Q6ZQ58	49	121476	1	1	1	1	0.04	RecName: Full=La-related protein 1; AltName: Full=La ribonucleoprotein domain family member 1;
520	1	UniProt_SwissProt	Q8C0P7	90	123128	2	1	2	1	0.04	RecName: Full=Zinc finger protein 451;
951	1	UniProt_SwissProt	B2RRE7	31	123891	1	1	1	1	0.04	RecName: Full=OTU domain-containing protein 4; EC=3.4.19.12;
549	1	UniProt_SwissProt	Q9ESC8	82	126962	1	1	1	1	0.04	RecName: Full=AF4/FMR2 family member 4;
804	1	UniProt_SwissProt	Q6A4J8	46	129477	1	1	1	1	0.04	RecName: Full=Ubiquitin carboxyl-terminal hydrolase 7; EC=3.4.19.12; AltName: Full=Deubiquitinating enzyme 7; AltName: Full=Herpesvirus-associated ubiquitin-specific protease; Short=mHAUSP; AltName: Full=Ubiquitin thioesterase 7; AltName: Full=Ubiquitin-specific-processing protease 7;
855	1	UniProt_SwissProt	P46735	41	129509	2	1	2	1	0.04	RecName: Full=Unconventional myosin-Ib; AltName: Full=MIH-L; AltName: Full=Myosin I alpha; Short=MMI-alpha; Short=MMIa;
970	1	UniProt_SwissProt	Q80XC6	27	134637	1	1	1	1	0.04	RecName: Full=Protein NRDE2 homolog;
901	1	UniProt_SwissProt	Q6UJY2	37	136540	1	1	1	1	0.04	RecName: Full=Sodium/hydrogen exchanger 10; AltName: Full=Na(+)/H(+) exchanger 10; Short=NHE-10; AltName: Full=Solute carrier family 10 member 10; AltName: Full=Solute carrier family 9 member C1; AltName: Full=Sperm-specific Na(+)/H(+) exchanger; Short=sNHE;
535	1	UniProt_SwissProt	P11276	85	276017	4	2	4	2	0.03	RecName: Full=Fibronectin; Short=FN; Contains: RecName: Full=Anastellin; Flags: Precursor;
668	1	UniProt_SwissProt	Q8BKF1	63	137930	1	1	1	1	0.03	RecName: Full=DNA-directed RNA polymerase, mitochondrial; Short=MtRPOL; EC=2.7.7.6; Flags: Precursor;
926	1	UniProt_SwissProt	P10493	34	139302	1	1	1	1	0.03	RecName: Full=Nidogen-1; Short=NID-1; AltName: Full=Entactin; Flags: Precursor;
750	1	UniProt_SwissProt	Q6DID3	52	139885	3	1	3	1	0.03	RecName: Full=Protein SCAF8; AltName: Full=RNA-binding motif protein 16; AltName: Full=SR-related and CTD-associated factor 8;
918	1	UniProt_SwissProt	Q6ZPZ3	35	141564	2	1	2	1	0.03	RecName: Full=Zinc finger CCCH domain-containing protein 4;
818	1	UniProt_SwissProt	Q8VDJ3	45	142225	1	1	1	1	0.03	RecName: Full=Vigilin; AltName: Full=High density lipoprotein-binding protein; Short=HDL-binding protein;
448	1	UniProt_SwissProt	Q80YV3	108	294392	4	2	4	2	0.03	RecName: Full=Transformation/transcription domain-associated protein; AltName: Full=Tra1 homolog;
859	1	UniProt_SwissProt	Q6Y7W8	40	149387	1	1	1	1	0.03	RecName: Full=PERQ amino acid-rich with GYF domain-containing protein 2; AltName: Full=GRB10-interacting GYF protein 2; AltName: Full=Trinucleotide repeat-containing gene 15 protein;
878	1	UniProt_SwissProt	Q3TRM4	39	150869	1	1	1	1	0.03	RecName: Full=Neuropathy target esterase; EC=3.1.1.5; AltName: Full=Patatin-like phospholipase domain-containing protein 6;
778	1	UniProt_SwissProt	Q6P1G2	49	152033	1	1	1	1	0.03	RecName: Full=Lysine-specific demethylase 2B; EC=1.14.11.27; AltName: Full=F-box and leucine-rich repeat protein 10; AltName: Full=F-box protein FBL10; AltName: Full=F-box/LRR-repeat protein 10; AltName: Full=JmjC domain-containing histone demethylation protein 1B; AltName: Full=[Histone-H3]-lysine-36 demethylase 1B;
824	1	UniProt_SwissProt	Q3UJB9	44	153758	2	1	2	1	0.03	RecName: Full=Enhancer of mRNA-decapping protein 4;
410	2	UniProt_SwissProt	Q3TLH4	55	311330	2	2	2	2	0.03	RecName: Full=Protein PRRC2C; AltName: Full=BAT2 domain-containing protein 1; AltName: Full=HLA-B-associated transcript 2-like 2; AltName: Full=Proline-rich and coiled-coil-containing protein 2C;
629	1	UniProt_SwissProt	Q5XG71	69	320222	3	2	3	2	0.03	RecName: Full=Small subunit processome component 20 homolog; AltName: Full=Down-regulated in metastasis protein;
831	1	UniProt_SwissProt	Q6ZQ06	43	161156	2	1	2	1	0.03	RecName: Full=Centrosomal protein of 162 kDa; Short=Cep162; AltName: Full=Protein QN1 homolog;
584	1	UniProt_SwissProt	Q80YE7	75	163221	4	1	4	1	0.03	RecName: Full=Death-associated protein kinase 1; Short=DAP kinase 1; EC=2.7.11.1;
871	1	UniProt_SwissProt	A2A6A1	40	165914	1	1	1	1	0.03	RecName: Full=G patch domain-containing protein 8;
729	1	UniProt_SwissProt	Q3UQ28	54	167621	1	1	1	1	0.03	RecName: Full=Peroxidasin homolog; EC=1.11.1.7; Flags: Precursor;
890	1	UniProt_SwissProt	Q925J9	38	168006	2	1	2	1	0.03	RecName: Full=Mediator of RNA polymerase II transcription subunit 1; AltName: Full=Mediator complex subunit 1; AltName: Full=Peroxisome proliferator-activated receptor-binding protein; Short=PBP; Short=PPAR-binding protein; AltName: Full=Thyroid hormone receptor-associated protein complex 220 kDa component; Short=Trap220; AltName: Full=Thyroid receptor-interacting protein 2; Short=TR-interacting …
637	1	UniProt_SwissProt	Q8CHI8	68	338396	5	2	5	2	0.03	RecName: Full=E1A-binding protein p400; EC=3.6.4.-; AltName: Full=Domino homolog; Short=mDomino; AltName: Full=p400 kDa SWI2/SNF2-related protein;
790	1	UniProt_SwissProt	Q80TV8	47	170149	2	1	2	1	0.03	RecName: Full=CLIP-associating protein 1; AltName: Full=Cytoplasmic linker-associated protein 1;
494	1	UniProt_SwissProt	P19137	94	347249	4	2	4	2	0.03	RecName: Full=Laminin subunit alpha-1; AltName: Full=Laminin A chain; AltName: Full=Laminin-1 subunit alpha; AltName: Full=Laminin-3 subunit alpha; AltName: Full=S-laminin subunit alpha; Short=S-LAM alpha; Flags: Precursor;
872	1	UniProt_SwissProt	Q6P1D7	40	174129	2	1	2	1	0.03	RecName: Full=Structure-specific endonuclease subunit SLX4; AltName: Full=BTB/POZ domain-containing protein 12;
908	1	UniProt_SwissProt	Q6NZJ6	36	176823	1	1	1	1	0.03	RecName: Full=Eukaryotic translation initiation factor 4 gamma 1; Short=eIF-4-gamma 1; Short=eIF-4G 1; Short=eIF-4G1;
682	1	UniProt_SwissProt	Q6ZPV2	61	177265	2	1	2	1	0.03	RecName: Full=DNA helicase INO80; EC=3.6.4.12; AltName: Full=INO80 complex subunit A; AltName: Full=Putative DNA helicase INO80 complex homolog 1;
937	1	UniProt_SwissProt	A6H619	32	185622	1	1	1	1	0.03	RecName: Full=PHD and RING finger domain-containing protein 1;
854	1	UniProt_SwissProt	P01027	41	187905	1	1	1	1	0.03	RecName: Full=Complement C3; AltName: Full=HSE-MSF; Contains: RecName: Full=Complement C3 beta chain; Contains: RecName: Full=Complement C3 alpha chain; Contains: RecName: Full=C3a anaphylatoxin; Contains: RecName: Full=Acylation stimulating protein; Short=ASP; AltName: Full=C3adesArg; Contains: RecName: Full=Complement C3b alpha' chain; Contains: RecName: Full=Complement C3c alpha' chain fragmen…
759	1	UniProt_SwissProt	Q9Z0R4	52	195089	1	1	1	1	0.02	RecName: Full=Intersectin-1; AltName: Full=EH and SH3 domains protein 1;
811	1	UniProt_SwissProt	Q6P5H2	45	207627	3	2	2	1	0.02	RecName: Full=Nestin;
599	1	UniProt_SwissProt	Q61001	74	416165	2	2	2	2	0.02	RecName: Full=Laminin subunit alpha-5; AltName: Full=Laminin-10 subunit alpha; AltName: Full=Laminin-11 subunit alpha; AltName: Full=Laminin-15 subunit alpha; Flags: Precursor;
679	1	UniProt_SwissProt	P53995	62	218250	3	1	3	1	0.02	RecName: Full=Anaphase-promoting complex subunit 1; Short=APC1; AltName: Full=Cyclosome subunit 1; AltName: Full=Mitotic checkpoint regulator; AltName: Full=Testis-specific gene 24 protein;
821	1	UniProt_SwissProt	Q99KW3	44	225171	2	1	2	1	0.02	RecName: Full=TRIO and F-actin-binding protein; AltName: Full=Protein Tara; AltName: Full=Trio-associated repeat on actin;
626	1	UniProt_SwissProt	Q6P5D8	69	227502	2	1	2	1	0.02	RecName: Full=Structural maintenance of chromosomes flexible hinge domain-containing protein 1;
806	1	UniProt_SwissProt	Q99MZ6	46	242701	1	1	1	1	0.02	RecName: Full=Unconventional myosin-VIIb;
959	1	UniProt_SwissProt	Q6JPI3	29	244569	2	1	2	1	0.02	RecName: Full=Mediator of RNA polymerase II transcription subunit 13-like; AltName: Full=Mediator complex subunit 13-like; AltName: Full=Thyroid hormone receptor-associated protein 2; AltName: Full=Thyroid hormone receptor-associated protein complex 240 kDa component-like;
149	2	UniProt_SwissProt	Q9QXS1	71	535828	8	2	8	2	0.02	RecName: Full=Plectin; Short=PCN; Short=PLTN; AltName: Full=Plectin-1; AltName: Full=Plectin-6;
591	1	UniProt_SwissProt	O88491	75	289037	2	1	2	1	0.02	RecName: Full=Histone-lysine N-methyltransferase, H3 lysine-36 and H4 lysine-20 specific; EC=2.1.1.43; AltName: Full=H3-K36-HMTase; AltName: Full=H4-K20-HMTase; AltName: Full=Nuclear receptor-binding SET domain-containing protein 1; Short=NR-binding SET domain-containing protein;
808	1	UniProt_SwissProt	Q9Z2U2	45	305534	4	1	3	1	0.02	RecName: Full=Zinc finger protein 292; AltName: Full=Zinc finger protein 15; Short=Zfp-15;
940	1	UniProt_SwissProt	Q6KCD5	32	317306	1	1	1	1	0.02	RecName: Full=Nipped-B-like protein; AltName: Full=Delangin homolog; AltName: Full=SCC2 homolog;
798	1	UniProt_SwissProt	A2AWL7	47	330480	2	1	2	1	0.01	RecName: Full=MAX gene-associated protein;

## Sheet: summary unique proteins
	Accession	emPAI
Fbxl19	Q6PB97	15.245
Skp1	Q9WTX5	13.42
PSME3/PA28g	P61290	5.12
CDK-Mediator subunits
Med31	Q9CXU1	0.34
Cdk8	Q8R3L8	0.3
Med22	Q62276	0.23
Med24	Q99K74	0.115
Med27	Q9DB40	0.14
Med12	A2AGH6	0.09
Med17	Q8VCD5	0.07
Med16	Q6PGF3	0.08
Med13	Q5SWW4	0.04
Med14	A2ABV5	0.045
Med23	Q80YQ2	0.06
Med1	Q925J9	0.03
Med13L	Q6JPI3	0.02
Med8	Q9D7W5	0.17
CncC	Q62447	0.15
Other proteins
ddx39b	Q9Z1N5	0.91
snRNP core protein D2	P62317	5.115
MAT3	Q924K8	0.19
Sox-2	P48432	0.325
MLF1-associated nuclear protein;	Q00PI9	0.12
DnaJ homolog subfamily A member 2	Q9QYJ0	0.11
Brg1	O54941	0.11
Cleavage and polyadenylation specificity factor subunit 7	Q8BTV2	0.2
U4/U6 small nuclear ribonucleoprotein Prp31	Q8CCF0	0.135
TCP1-b	P80314	0.185
RG1-associated factor 60A	Q61466	0.175
Zinc finger RNA-binding protein;	O88532	0.23
Cleavage stimulation factor subunit 2	Q8BIQ5	0.275
Sin3a	Q60520	0.145
G2 and S phase-expressed protein 1	Q8R080	0.095
Targeting protein for Xklp2	A2APB8	0.67
Nucleoprotein TPR	F6ZDS4	0.09
cul5	Q9D5V5	0.05
Importin subunit beta-1	Q6PGF3	0.08
Histone deacetylase complex subunit SAP130	Q8BIH0	0.04
BRG1-associated factor 250	A2BH40	0.07
Nuclear factor related to kappa-B-binding protein	Q6PIJ4	0.05
DNA-directed RNA polymerase I subunit RPA1	O35134	0.265
Kinesin-like protein KIF20B	Q80WE4	0.4
MAX gene-associated protein	A2AWL7	0.015
