# Supplementary material for: FBXL19 recruits CDK-Mediator to CpG islands of developmental genes priming them for activation during lineage commitment
Source: eLife journal article supplement (doi:10.7554/elife.37084), 2018-05-29
Supplement: supp [file elife-37084-supp-v1.zip › elife_poa_e37084_Figure_6_source_data_1.xlsx]

## Sheet: Content
Figure 6 - source data 1. Differential gene expression analysis
Table 6.1	DeSeq2 analysis of differential expression between TAM-treated (dCxxC Fbxl19) ESC cells and WT (Fbxl19 fl/fl) ES cells. Genes significanlty more highly expressed in WT ES cells are given in bold. Genes significantly more highly expressed in TAM-treated ES cells are given in red.
Table 6.2	DeSeq2 analysis of differential expression between RA-treated cells and ES cells. Genes significanlty more highly expressed in RA-treated cells are given in red. Genes significantly more highly expressed in ES cells are given in black.
Table 6.3	DeSeq2 analysis of differential expression between TAM-treated (dCxxC Fbxl19) cells and WT (Fbxl19 fl/fl) cells following 72h of RA differentiation. Genes significanlty more highly expressed in WT cells are given in bold. Genes significantly more highly expressed in TAM-treated cells are given in red.
Table 6.4	GO enrichment analysis of differentially expressed genes with higher expression in WT (Fbxl19 fl/fl) cells compared to TAM treated (dCxxC Fbxl19) cells following 72h of RA differenitation. Significant terms are in bold
Table 6.5	GO enrichment analysis of differentially expressed genes with higher expression in TAM treated (dCxxC Fbxl19) cells compared to WT (Fbxl19 fl/fl) cells following 72h of RA differenitation. Significant terms are in bold

## Sheet: 1. Expression ESC TAMvsUNT
	baseMean	log2FoldChange	lfcSE	stat	pvalue	padj
NM_001077515	26.3969	-2.12677	0.491683	-4.32549	1.52196e-05	NA
NM_011393	21.4627	-2.06801	0.501309	-4.12522	3.70378e-05	NA
NM_182928	7.82336	-1.85216	0.523023	-3.54126	0.000398215	NA
NM_001287514	8.24656	-1.77604	0.540196	-3.28778	0.00100982	NA
NM_001287515	8.24656	-1.77604	0.540196	-3.28778	0.00100982	NA
NM_001287521	8.24656	-1.77604	0.540196	-3.28778	0.00100982	NA
NM_001287523	8.24656	-1.77604	0.540196	-3.28778	0.00100982	NA
NM_007678	8.24656	-1.77604	0.540196	-3.28778	0.00100982	NA
NM_026929	113.165	-1.6976	0.395829	-4.28872	1.79703e-05	0.0145553
NM_011990	56.8215	-1.67191	0.447489	-3.7362	NA	NA
NM_011141	48.3196	-1.5619	0.30699	-5.0878	3.62246e-07	0.00152571
NM_011491	333.27	-1.4145	0.280061	-5.05067	4.40257e-07	0.00154523
NM_010446	13.3763	-1.36857	0.5307	-2.5788	0.00991428	NA
NM_001291065	13.3062	-1.36658	0.531376	-2.57177	0.010118	NA
NM_177753	84.0308	-1.32742	0.369582	-3.59168	0.000328556	0.0997475
NM_029116	15.5212	-1.29917	0.525426	-2.47261	0.013413	NA
NM_016968	71.9471	-1.29483	0.358695	-3.60982	0.000306408	0.09674
NM_001162926	102.276	-1.28798	0.293699	-4.38536	1.15797e-05	0.0106024
NM_001077514	43.6813	-1.26684	0.378899	-3.34349	0.000827317	0.167524
NM_001291067	12.3852	-1.25988	0.53129	-2.37136	0.017723	NA
NM_027570	6.75603	-1.23651	0.503767	-2.45454	0.0141066	NA
NM_009962	5.48442	-1.23473	0.558776	-2.20971	0.0271252	NA
NM_016889	20.8641	-1.18082	0.376901	-3.13296	0.00173051	NA
NM_001161420	156.568	-1.16543	0.335928	-3.46929	0.000521833	0.126959
NM_013703	156.568	-1.16543	0.335928	-3.46929	0.000521833	0.126959
NR_122039	33.5914	-1.16235	0.42622	-2.72711	0.00638911	NA
NM_001098789	3.27851	-1.14633	0.576332	-1.98901	0.0467005	NA
NM_013912	12.2983	-1.145	0.471312	-2.42939	0.0151244	NA
NM_008417	7.87833	-1.14444	0.496895	-2.30318	0.0212687	NA
NM_028994	267.199	-1.14279	0.269938	-4.23353	2.3005e-05	0.0167056
NM_010286	34.6	-1.14014	0.414884	-2.74809	0.00599439	NA
NM_175093	175.592	-1.13712	0.268474	-4.23549	2.28053e-05	0.0167056
NM_172383	26.4794	-1.11359	0.413347	-2.69407	0.00705853	NA
NM_009061	12.159	-1.08236	0.515548	-2.09945	0.0357776	NA
NR_027926	15.5333	-1.07223	0.444647	-2.41141	0.0158908	NA
NR_027059	288.416	-1.07169	0.273408	-3.91975	8.86416e-05	0.0513039
NM_023386	4.93768	-1.06362	0.576853	-1.84384	0.0652067	NA
NM_019738	19.3969	-1.06087	0.410383	-2.58507	0.00973604	NA
NM_008235	114.734	-1.06038	0.326312	-3.24959	0.00115571	0.200488
NM_023850	23.6943	-1.05899	0.412607	-2.56659	0.0102705	NA
NM_001271981	10.8694	-1.05758	0.472447	-2.23851	0.0251875	NA
NM_008051	10.8694	-1.05758	0.472447	-2.23851	0.0251875	NA
NM_008113	13.5705	-1.05496	0.455391	-2.3166	0.0205254	NA
NM_001110266	342.897	-1.05433	0.212811	-4.9543	7.25899e-07	0.00169852
NM_001110267	342.897	-1.05433	0.212811	-4.9543	7.25899e-07	0.00169852
NM_001110268	342.897	-1.05433	0.212811	-4.9543	7.25899e-07	0.00169852
NR_004446	16.4428	-1.0536	0.408175	-2.58124	0.0098447	NA
NM_008494	72.4153	-1.04758	0.290297	-3.60866	0.000307782	0.09674
NM_031166	45.1318	-1.04456	0.335702	-3.11156	0.00186099	0.22495
NM_010442	652.245	-1.04455	0.305852	-3.4152	0.000637356	0.141285
NM_010242	24.6824	-1.03844	0.455962	-2.27748	0.0227576	NA
NM_001166361	39.0363	-1.03708	0.576743	-1.79817	0.0721505	0.547343
NM_001166362	39.0363	-1.03708	0.576743	-1.79817	0.0721505	0.547343
NM_001166363	39.0363	-1.03708	0.576743	-1.79817	0.0721505	0.547343
NM_010205	39.0363	-1.03708	0.576743	-1.79817	0.0721505	0.547343
NM_146202	55.0195	-1.03589	0.407931	-2.53937	0.0111051	0.396988
NM_001025250	518.421	-1.0325	0.215337	-4.79479	1.62843e-06	0.0022862
NM_001025257	518.421	-1.0325	0.215337	-4.79479	1.62843e-06	0.0022862
NM_001287056	518.421	-1.0325	0.215337	-4.79479	1.62843e-06	0.0022862
NM_001287057	518.421	-1.0325	0.215337	-4.79479	1.62843e-06	0.0022862
NM_001287058	518.421	-1.0325	0.215337	-4.79479	1.62843e-06	0.0022862
NM_009505	518.421	-1.0325	0.215337	-4.79479	1.62843e-06	0.0022862
NM_144549	342.962	-1.03204	0.220338	-4.68388	2.81496e-06	0.00296402
NR_045046	13.8316	-1.0317	0.478529	-2.15597	0.0310858	NA
NM_010094	739.26	-1.02996	0.479989	-2.1458	0.0318887	0.467172
NM_175263	89.2981	-1.02957	0.242461	-4.24634	2.17289e-05	0.0167056
NM_010574	41.9002	-1.02937	0.360726	-2.85362	0.00432245	0.343496
NM_008086	133.887	-1.02293	0.500176	-2.04514	0.0408412	0.493498
NM_001193274	11.3142	-1.02226	0.538262	-1.89919	0.0575397	NA
NM_183143	11.3142	-1.02226	0.538262	-1.89919	0.0575397	NA
NM_024467	138.179	-1.012	0.352003	-2.87498	0.00404057	0.326685
NM_008135	210.144	-1.00969	0.223354	-4.52055	6.16791e-06	0.00618523
NM_001270646	53.2084	-1.00807	0.399742	-2.5218	0.0116757	0.396988
NM_001033302	47.4471	-1.00715	0.284588	-3.53898	0.000401677	0.114423
NM_008592	16.5141	-1.00714	0.502475	-2.00436	0.0450313	NA
NM_009574	198.028	-0.998617	0.296255	-3.3708	0.000749506	0.156276
NM_008063	27.2242	-0.99522	0.356103	-2.79475	0.00519397	NA
NM_177226	170.921	-0.994101	0.376929	-2.63737	0.00835509	0.367113
NM_001081679	18.1216	-0.99264	0.377199	-2.63161	0.00849819	NA
NM_022409	132.608	-0.991773	0.329922	-3.00608	0.00264638	0.261644
NM_021457	47.5105	-0.9917	0.385147	-2.57486	0.0100281	0.385326
NM_029385	41.7873	-0.990563	0.319243	-3.10285	0.0019167	0.22495
NM_007786	48.6144	-0.989004	0.401632	-2.46247	0.0137985	0.415565
NM_019877	44.1692	-0.987809	0.45421	-2.17479	0.0296461	0.462857
NM_027919	17.9856	-0.987317	0.491008	-2.0108	0.0443469	NA
NM_001163518	18.7405	-0.985868	0.427548	-2.30586	0.0211182	NA
NM_146059	18.7405	-0.985868	0.427548	-2.30586	0.0211182	NA
NM_001287180	1441.52	-0.983978	0.29696	-3.3135	0.000921363	0.180463
NM_009716	1441.52	-0.983978	0.29696	-3.3135	0.000921363	0.180463
NM_177013	17.5363	-0.981319	0.423045	-2.31966	0.0203594	NA
NM_010218	51.1714	-0.979637	0.37273	-2.62827	0.00858192	0.367113
NR_015538	34.4308	-0.967467	0.372024	-2.60055	0.00930751	NA
NM_001282016	28.2488	-0.963768	0.34883	-2.76286	0.00572973	NA
NM_008772	28.2488	-0.963768	0.34883	-2.76286	0.00572973	NA
NR_131125	17.8804	-0.96241	0.402503	-2.39107	0.0167995	NA
NR_131126	17.8804	-0.96241	0.402503	-2.39107	0.0167995	NA
NM_010827	87.9027	-0.96177	0.337735	-2.8477	0.00440357	0.346017
NM_027715	135.398	-0.961636	0.274839	-3.49891	0.00046717	0.123189
NM_008199	75.2038	-0.958762	0.283898	-3.37714	0.00073244	0.154267
NM_008452	745.999	-0.958334	0.297236	-3.22415	0.00126348	0.204
NM_146004	4.47584	-0.958181	0.573348	-1.6712	0.0946817	NA
NM_022331	288.568	-0.957891	0.270765	-3.53772	0.0004036	0.114423
NR_033782	26.7051	-0.957889	0.41171	-2.32661	0.019986	NA
NM_001039562	24.5196	-0.957392	0.370125	-2.58667	0.00969078	NA
NM_001077348	14.7562	-0.954129	0.478863	-1.99249	0.0463177	NA
NM_025874	14.7562	-0.954129	0.478863	-1.99249	0.0463177	NA
NM_001045484	110.982	-0.953317	0.252868	-3.77003	0.00016323	0.0804557
NM_145147	300.381	-0.952559	0.264584	-3.60021	0.00031796	0.0984694
NM_175126	248.99	-0.9487	0.297309	-3.19096	0.00141803	0.210298
NM_011508	1414.88	-0.94725	0.282819	-3.34931	0.000810126	0.165635
NM_007707	305.566	-0.944031	0.453779	-2.08038	0.0374908	0.487342
NM_007483	721.231	-0.943336	0.461249	-2.04518	0.0408371	0.493498
NM_146100	282.209	-0.941138	0.252231	-3.73125	0.000190534	0.08611
NM_011427	84.0707	-0.941006	0.350791	-2.68253	0.00730681	0.362057
NM_025593	114.802	-0.934524	0.326249	-2.86445	0.0041773	0.334486
NM_013819	31.941	-0.934196	0.360417	-2.59198	0.00954242	NA
NM_001098237	26.1737	-0.931642	0.383149	-2.43154	0.0150347	NA
NM_133759	26.1737	-0.931642	0.383149	-2.43154	0.0150347	NA
NM_016967	161.361	-0.9315	0.294119	-3.16708	0.00153978	0.22363
NM_010423	15.5126	-0.931461	0.469506	-1.98392	0.0472651	NA
NM_145459	81.6913	-0.931068	0.449804	-2.06994	0.0384578	0.487342
NM_010910	105.46	-0.93103	0.342066	-2.72178	0.00649306	0.350982
NM_009328	151.891	-0.927562	0.305217	-3.03902	0.00237346	0.24867
NM_009627	19.4777	-0.92524	0.497356	-1.86032	0.0628404	NA
NM_198615	159.681	-0.925132	0.281855	-3.2823	0.00102963	0.190202
NM_001033262	28.3333	-0.923327	0.350069	-2.63756	0.00835052	NA
NM_001289726	1380.78	-0.923312	0.26151	-3.53069	0.000414476	0.114423
NM_008084	1378.97	-0.923167	0.261466	-3.53074	0.000414406	0.114423
NR_045421	19.8871	-0.922331	0.372807	-2.47401	0.0133604	NA
NM_001001985	36.6919	-0.918831	0.401532	-2.28831	0.0221194	0.441926
NM_178757	114.039	-0.915871	0.307226	-2.9811	0.00287214	0.279574
NM_011437	16.5241	-0.909896	0.523503	-1.73809	0.0821947	NA
NM_007545	101.755	-0.909428	0.320926	-2.83376	0.00460033	0.346017
NR_126541	317.451	-0.909246	0.2599	-3.49845	0.000467975	0.123189
NM_031373	245	-0.908629	0.295104	-3.07901	0.00207689	0.226652
NM_008415	239.668	-0.90798	0.337879	-2.68729	0.00720338	0.360323
NM_145981	15.1215	-0.906743	0.447066	-2.02821	0.042539	NA
NM_001163102	138.929	-0.903056	0.321037	-2.81293	0.00490917	0.346017
NM_177375	28.0171	-0.903039	0.403702	-2.2369	0.0252932	NA
NM_001164563	19.8989	-0.902561	0.415861	-2.17034	0.0299808	NA
NM_001164602	19.8989	-0.902561	0.415861	-2.17034	0.0299808	NA
NM_178114	19.8989	-0.902561	0.415861	-2.17034	0.0299808	NA
NM_001002005	30.5592	-0.899356	0.375102	-2.39763	0.0165015	NA
NR_033476	17.884	-0.897901	0.407469	-2.20361	0.0275519	NA
NM_153565	27.4884	-0.895819	0.359723	-2.4903	0.0127634	NA
NM_009076	1201.51	-0.895762	0.304712	-2.9397	0.00328533	0.295666
NM_025451	93.1611	-0.890938	0.275509	-3.23379	0.0012216	0.202564
NR_077226	36.4695	-0.889694	0.333601	-2.66694	0.00765452	0.364698
NM_010835	23.5476	-0.88814	0.466533	-1.9037	0.0569491	NA
NM_177846	234.028	-0.886768	0.275921	-3.21385	0.00130969	0.204
NM_008058	114.15	-0.885553	0.354781	-2.49605	0.0125583	0.405611
NM_001190451	35.793	-0.884468	0.481485	-1.83696	0.0662157	NA
NM_009266	316.678	-0.884077	0.325143	-2.71904	0.00654708	0.350982
NM_022987	228.988	-0.880625	0.318923	-2.76125	0.00575814	0.346017
NR_037973	15.4	-0.880185	0.495012	-1.77811	0.0753862	NA
NM_001167832	39.8256	-0.877754	0.315691	-2.78043	0.00542876	0.346017
NM_146203	39.8256	-0.877754	0.315691	-2.78043	0.00542876	0.346017
NM_001033293	210.627	-0.877524	0.310755	-2.82385	0.00474511	0.346017
NM_138302	89.0226	-0.877496	0.353954	-2.47912	0.0131707	0.412741
NM_177630	60.6367	-0.876773	0.321501	-2.72712	0.006389	0.350982
NM_008654	303.673	-0.874836	0.348909	-2.50735	0.0121641	0.399907
NM_026006	61.6334	-0.8742	0.33363	-2.62027	0.00878603	0.367113
NM_001033171	29.7974	-0.87294	0.380494	-2.29423	0.0217774	NA
NM_145478	416.127	-0.87085	0.271159	-3.21158	0.00132006	0.204
NM_001271435	102.677	-0.868516	0.328592	-2.64314	0.00821405	0.366687
NM_024472	43.5993	-0.866013	0.316661	-2.73482	0.00624138	0.349587
NM_007836	320.158	-0.865048	0.279375	-3.09636	0.0019591	0.22495
NM_001163713	129.708	-0.86439	0.292285	-2.95735	0.00310292	0.287085
NM_172745	129.708	-0.86439	0.292285	-2.95735	0.00310292	0.287085
NM_001111288	103.442	-0.863836	0.344875	-2.50478	0.0122527	0.401031
NM_138742	11.882	-0.863137	0.467962	-1.84446	0.0651162	NA
NM_001042726	10.0649	-0.860962	0.541807	-1.58906	0.112048	NA
NM_021543	10.0649	-0.860962	0.541807	-1.58906	0.112048	NA
NM_030696	370.951	-0.860938	0.462793	-1.86031	0.0628414	0.533788
NM_001038653	370.687	-0.859393	0.46264	-1.85758	0.0632282	0.534643
NM_001038654	370.687	-0.859393	0.46264	-1.85758	0.0632282	0.534643
NM_001252316	351.989	-0.858885	0.236257	-3.63538	0.000277566	0.0899272
NM_028230	351.989	-0.858885	0.236257	-3.63538	0.000277566	0.0899272
NM_001081129	68.5992	-0.858511	0.359047	-2.39109	0.0167986	0.418062
NM_010907	188.496	-0.858168	0.297445	-2.88513	0.00391257	0.320603
NM_009308	18.7223	-0.858067	0.410935	-2.08808	0.0367904	NA
NM_009077	642.056	-0.857544	0.296939	-2.88795	0.00387762	0.31949
NM_009259	12.7458	-0.857473	0.458674	-1.86946	0.0615589	NA
NM_021704	21.2444	-0.852417	0.415338	-2.05235	0.0401361	NA
NM_178646	22.1838	-0.851812	0.419308	-2.03147	0.0422071	NA
NM_013692	606.368	-0.851473	0.225949	-3.76842	0.000164281	0.0804557
NM_145222	531.532	-0.85144	0.262873	-3.23898	0.00119956	0.200488
NR_077221	34.0741	-0.849446	0.334652	-2.5383	0.0111392	NA
NM_001285457	366.811	-0.849035	0.264665	-3.20796	0.00133682	0.204
NM_010279	366.811	-0.849035	0.264665	-3.20796	0.00133682	0.204
NR_104342	366.811	-0.849035	0.264665	-3.20796	0.00133682	0.204
NR_029463	80.1902	-0.848971	0.268625	-3.16044	0.00157532	0.223897
NM_022435	59.1043	-0.848835	0.436759	-1.94348	0.0519577	0.508765
NM_001166399	9.20024	-0.848267	0.508219	-1.6691	0.0950979	NA
NM_009001	9.20024	-0.848267	0.508219	-1.6691	0.0950979	NA
NM_019833	91.6761	-0.848239	0.323387	-2.62299	0.00871624	0.367113
NM_175284	111.229	-0.847855	0.377092	-2.2484	0.0245506	0.446459
NM_001048058	1333.94	-0.84575	0.271484	-3.11529	0.00183765	0.22495
NM_001048057	1334.09	-0.845379	0.271461	-3.11418	0.00184457	0.22495
NM_023372	1334.09	-0.845379	0.271461	-3.11418	0.00184457	0.22495
NM_018758	92.5626	-0.844116	0.284394	-2.96812	0.00299628	0.286246
NM_198607	49.5077	-0.842272	0.338279	-2.48988	0.0127788	0.40774
NM_001285855	9.15243	-0.840651	0.507406	-1.65676	0.0975678	NA
NM_013610	141.678	-0.840485	0.364632	-2.30502	0.0211654	0.440437
NM_001289471	650.623	-0.840418	0.214627	-3.91571	9.01394e-05	0.0513039
NM_013770	192.856	-0.838826	0.344168	-2.43726	0.0147991	0.415565
NM_001277132	9.51314	-0.838762	0.453292	-1.85038	0.0642591	NA
NM_009708	32.2358	-0.838705	0.368799	-2.27415	0.0229567	NA
NM_001166368	73.3298	-0.836575	0.313464	-2.66881	0.00761214	0.363501
NM_008020	73.3298	-0.836575	0.313464	-2.66881	0.00761214	0.363501
NR_028262	85.9114	-0.836151	0.379742	-2.2019	0.0276727	0.461944
NM_138606	230.159	-0.835161	0.269045	-3.10416	0.00190818	0.22495
NM_201531	13.1453	-0.834205	0.518793	-1.60797	0.107841	NA
NM_134117	191.89	-0.833846	0.500521	-1.66596	0.0957224	0.566585
NM_001037810	12.8968	-0.831491	0.456671	-1.82077	0.0686422	NA
NM_001293631	32.4545	-0.829834	0.32525	-2.55138	0.0107298	NA
NR_015525	22.3375	-0.82921	0.406557	-2.03959	0.0413911	NA
NM_009181	153.748	-0.829169	0.300407	-2.76016	0.00577738	0.346017
NR_015552	22.4266	-0.828906	0.399139	-2.07673	0.0378261	NA
NR_046233	158195	-0.827971	0.226303	-3.65868	0.000253517	0.08611
NM_001290695	448.328	-0.826238	0.295729	-2.7939	0.00520761	0.346017
NM_026270	448.328	-0.826238	0.295729	-2.7939	0.00520761	0.346017
NM_175122	36.7071	-0.825444	0.386847	-2.13377	0.0328614	0.471448
NM_001290477	23.8908	-0.824645	0.378086	-2.1811	0.029176	NA
NM_001290478	23.8908	-0.824645	0.378086	-2.1811	0.029176	NA
NM_172781	23.8908	-0.824645	0.378086	-2.1811	0.029176	NA
NM_172705	239.434	-0.823553	0.294567	-2.79581	0.00517697	0.346017
NM_147776	19.9005	-0.823401	0.427315	-1.92692	0.0539897	NA
NM_177001	67.5557	-0.823125	0.299825	-2.74535	0.00604461	0.348571
NM_001293630	32.3614	-0.821023	0.323909	-2.53473	0.0112533	NA
NM_176902	365.527	-0.820906	0.224253	-3.66062	0.000251602	0.08611
NR_038126	127.045	-0.820872	0.381022	-2.1544	0.031209	0.465132
NM_001085421	42.2822	-0.820651	0.359168	-2.28487	0.0223205	0.442189
NM_001034882	63.7966	-0.819361	0.32212	-2.54366	0.0109699	0.396067
NM_025963	1438.11	-0.819314	0.261245	-3.13619	0.00171158	0.22495
NM_029083	410.906	-0.818879	0.322615	-2.53825	0.0111408	0.396988
NM_001291076	64.5003	-0.818156	0.396847	-2.06164	0.0392418	0.488701
NM_001291077	64.5003	-0.818156	0.396847	-2.06164	0.0392418	0.488701
NM_198214	64.5003	-0.818156	0.396847	-2.06164	0.0392418	0.488701
NR_110334	37.4734	-0.817491	0.319129	-2.56164	0.0104181	0.391757
NM_011438	114.714	-0.816797	0.296422	-2.75552	0.00585992	0.346017
NR_045643	20.159	-0.816633	0.429155	-1.90288	0.0570556	NA
NM_170759	245.658	-0.816056	0.302056	-2.70168	0.00689912	0.352867
NM_001177601	111.201	-0.815961	0.294688	-2.7689	0.00562466	0.346017
NM_001177603	111.201	-0.815961	0.294688	-2.7689	0.00562466	0.346017
NM_001177606	111.201	-0.815961	0.294688	-2.7689	0.00562466	0.346017
NM_001177607	111.201	-0.815961	0.294688	-2.7689	0.00562466	0.346017
NM_026757	111.201	-0.815961	0.294688	-2.7689	0.00562466	0.346017
NM_145758	111.201	-0.815961	0.294688	-2.7689	0.00562466	0.346017
NM_175207	44.4173	-0.815099	0.331495	-2.45886	0.0139379	0.415565
NR_003376	363.476	-0.814553	0.223988	-3.6366	0.000276261	0.0899272
NM_011819	13.9622	-0.814258	0.461804	-1.76321	0.0778647	NA
NM_010658	11.0411	-0.812643	0.54955	-1.47874	0.13921	NA
NM_029182	80.7556	-0.812056	0.274663	-2.95656	0.00311091	0.287085
NM_144795	88.7043	-0.811566	0.350113	-2.31801	0.0204487	0.440437
NM_008343	412.83	-0.81062	0.337028	-2.4052	0.0161637	0.415565
NM_133678	109.54	-0.810287	0.294108	-2.75507	0.00586794	0.346017
NM_010500	196.679	-0.810025	0.464002	-1.74573	0.0808571	0.555915
NM_001190718	145.786	-0.808856	0.314285	-2.57364	0.0100636	0.385326
NM_178739	145.786	-0.808856	0.314285	-2.57364	0.0100636	0.385326
NM_009426	419.954	-0.808195	0.497717	-1.62381	0.104417	0.569526
NM_009189	42.633	-0.807394	0.379166	-2.12939	0.0332217	0.472714
NM_021511	288.005	-0.806293	0.310517	-2.59661	0.00941483	0.377576
NM_023633	95.6834	-0.805128	0.318625	-2.52689	0.0115079	0.396988
NM_009609	1816.02	-0.80497	0.320196	-2.51399	0.0119373	0.398075
NM_001001885	14.48	-0.804291	0.482404	-1.66726	0.0954636	NA
NM_001303121	131.579	-0.803437	0.303227	-2.64962	0.0080583	0.365732
NM_008506	131.579	-0.803437	0.303227	-2.64962	0.0080583	0.365732
NM_028662	155.137	-0.80263	0.265091	-3.02775	0.00246381	0.251631
NM_007865	92.6805	-0.801042	0.391097	-2.04819	0.0405413	0.493498
NM_001190885	23.0782	-0.799843	0.441418	-1.81198	0.0699888	NA
NM_001290690	23.0782	-0.799843	0.441418	-1.81198	0.0699888	NA
NM_027398	23.0782	-0.799843	0.441418	-1.81198	0.0699888	NA
NM_153134	143.614	-0.799089	0.31388	-2.54584	0.0109014	0.396067
NM_133949	359.626	-0.798863	0.283882	-2.81407	0.00489185	0.346017
NM_001290694	430.356	-0.797689	0.292779	-2.72454	0.00643913	0.350982
NM_153150	197.48	-0.796703	0.330394	-2.41137	0.0158927	0.415565
NM_010246	16.0326	-0.795089	0.422184	-1.88327	0.0596631	NA
NM_001253920	410.341	-0.792793	0.294165	-2.69506	0.00703759	0.354414
NM_175402	260.733	-0.791977	0.29107	-2.72092	0.0065101	0.350982
NM_011481	10.4177	-0.789247	0.492618	-1.60215	0.109123	NA
NM_008390	456.744	-0.788799	0.456607	-1.72752	0.0840737	0.557848
NM_001159396	442.059	-0.788043	0.456764	-1.72527	0.0844785	0.557848
NM_030705	286.662	-0.787461	0.256702	-3.06761	0.00215777	0.231839
NM_023900	156.519	-0.786679	0.266298	-2.95414	0.00313546	0.287085
NM_018861	1047.59	-0.786558	0.224463	-3.50418	0.000458015	0.123189
NM_011804	91.8229	-0.786363	0.258269	-3.04474	0.00232881	0.245212
NM_009437	58.7651	-0.785521	0.357662	-2.19626	0.028073	0.461944
NM_001013758	34.8941	-0.784761	0.411169	-1.90861	0.0563126	NA
NM_009127	478.92	-0.783945	0.287596	-2.72585	0.00641355	0.350982
NM_025604	156.129	-0.783209	0.237435	-3.29863	0.000971581	0.184329
NM_016701	772.889	-0.782348	0.436808	-1.79106	0.0732842	0.551646
NM_001163721	9.79436	-0.782158	0.543457	-1.43923	0.150086	NA
NM_001163722	9.79436	-0.782158	0.543457	-1.43923	0.150086	NA
NM_001166635	62.0838	-0.780933	0.323748	-2.41217	0.0158581	0.415565
NM_026524	62.0838	-0.780933	0.323748	-2.41217	0.0158581	0.415565
NM_010132	17.7828	-0.778027	0.537906	-1.4464	0.148065	NA
NM_001177841	99.8601	-0.777722	0.290693	-2.6754	0.00746392	0.363501
NM_026580	99.8601	-0.777722	0.290693	-2.6754	0.00746392	0.363501
NM_007833	32.4394	-0.777684	0.485389	-1.60219	0.109114	NA
NM_026042	241.804	-0.774475	0.201628	-3.84111	0.000122479	0.0651236
NM_011921	14.3581	-0.773035	0.526504	-1.46824	0.142038	NA
NM_001163465	27.0263	-0.772239	0.445832	-1.73213	0.0832506	NA
NM_008164	27.0263	-0.772239	0.445832	-1.73213	0.0832506	NA
NR_033587	100.178	-0.771616	0.291917	-2.64327	0.00821094	0.366687
NR_045902	17.0639	-0.771454	0.481893	-1.60088	0.109403	NA
NM_001159393	488.66	-0.77088	0.451363	-1.70789	0.0876563	0.559823
NM_025582	21.9836	-0.770834	0.456104	-1.69004	0.0910204	NA
NM_019883	366.632	-0.770092	0.290061	-2.65493	0.00793242	0.365732
NM_134100	103.304	-0.769845	0.315654	-2.43889	0.0147324	0.415565
NM_028235	32.0032	-0.768894	0.426365	-1.80337	0.0713299	NA
NM_173741	104.823	-0.768455	0.293158	-2.6213	0.00875955	0.367113
NR_033136	75.6977	-0.766819	0.305249	-2.51211	0.0120013	0.398232
NM_027914	108.354	-0.766263	0.24813	-3.08816	0.00201402	0.226652
NM_025870	49.5454	-0.765415	0.344277	-2.22325	0.0261989	0.4526
NM_133913	172.389	-0.765077	0.309986	-2.4681	0.0135832	0.414265
NM_011993	72.8129	-0.764096	0.350242	-2.18163	0.0291371	0.462857
NM_008057	711.784	-0.763851	0.272769	-2.80036	0.00510454	0.346017
NM_153543	59.9847	-0.763551	0.327564	-2.331	0.0197535	0.440437
NM_023131	134.715	-0.763016	0.291038	-2.62171	0.00874904	0.367113
NM_008709	1270.44	-0.763009	0.265084	-2.87836	0.00399742	0.326286
NM_001037915	12.0726	-0.762401	0.480506	-1.58666	0.112589	NA
NM_001009927	85.7531	-0.762263	0.345047	-2.20916	0.0271634	0.459097
NM_054044	1152.5	-0.762056	0.2796	-2.72552	0.00641994	0.350982
NM_001007581	135.895	-0.761874	0.302929	-2.51503	0.0119023	0.398075
NM_008638	413.109	-0.760047	0.207307	-3.66629	0.000246093	0.08611
NM_001033448	47.658	-0.758934	0.3838	-1.97742	0.0479941	0.497508
NM_010090	13.0343	-0.758742	0.463194	-1.63806	0.101409	NA
NR_015500	32.0511	-0.75837	0.338485	-2.24049	0.0250594	NA
NM_133719	72.1384	-0.757964	0.33826	-2.24078	0.0250406	0.448229
NM_009547	212.534	-0.757904	0.180127	-4.20761	2.58091e-05	0.0181171
NM_175340	18.0189	-0.757477	0.391123	-1.93667	0.0527853	NA
NM_009657	26.7637	-0.75707	0.386545	-1.95856	0.0501649	NA
NM_001163216	24.4474	-0.756412	0.36552	-2.06941	0.0385072	NA
NM_001163217	24.4474	-0.756412	0.36552	-2.06941	0.0385072	NA
NM_001163215	24.6995	-0.755296	0.366719	-2.0596	0.0394365	NA
NM_001205270	24.6995	-0.755296	0.366719	-2.0596	0.0394365	NA
NM_008010	24.6995	-0.755296	0.366719	-2.0596	0.0394365	NA
NM_011404	2046.92	-0.755017	0.186721	-4.04355	5.26471e-05	0.0357644
NM_144841	65.8993	-0.754879	0.341598	-2.20984	0.0271159	0.459031
NM_173395	112.218	-0.754281	0.324612	-2.32363	0.0201451	0.440437
NM_001081062	24.3856	-0.754201	0.377552	-1.99761	0.0457593	NA
NR_126540	866.109	-0.753589	0.230018	-3.27621	0.00105209	0.192661
NM_177410	37.5831	-0.751872	0.31246	-2.4063	0.016115	0.415565
NM_001305440	314.511	-0.751055	0.26603	-2.8232	0.00475474	0.346017
NM_001305441	314.511	-0.751055	0.26603	-2.8232	0.00475474	0.346017
NM_001305442	314.511	-0.751055	0.26603	-2.8232	0.00475474	0.346017
NM_011896	314.511	-0.751055	0.26603	-2.8232	0.00475474	0.346017
NM_020271	136.292	-0.750928	0.292851	-2.56419	0.0103415	0.391348
NM_008211	3040.13	-0.749015	0.283874	-2.63855	0.00832619	0.367113
NM_020028	128.384	-0.748837	0.275228	-2.72079	0.00651268	0.350982
NR_045613	12.7021	-0.74879	0.453074	-1.65269	0.0983943	NA
NM_030693	71.2835	-0.748293	0.298784	-2.50446	0.0122638	0.401031
NM_153775	168.573	-0.747698	0.269698	-2.77235	0.00556528	0.346017
NR_110337	14.7556	-0.747675	0.443349	-1.68642	0.0917141	NA
NM_134003	224.323	-0.74757	0.269465	-2.77427	0.00553258	0.346017
NM_001024619	448.557	-0.746055	0.228689	-3.26231	0.00110509	0.193934
NM_001168539	448.557	-0.746055	0.228689	-3.26231	0.00110509	0.193934
NM_001168540	448.557	-0.746055	0.228689	-3.26231	0.00110509	0.193934
NM_001168541	448.557	-0.746055	0.228689	-3.26231	0.00110509	0.193934
NM_001047436	25.7264	-0.745967	0.377046	-1.97845	0.0478777	NA
NM_001286344	25.7264	-0.745967	0.377046	-1.97845	0.0478777	NA
NM_001024707	104.497	-0.74523	0.315764	-2.36009	0.0182707	0.433557
NM_001271422	16.6252	-0.743966	0.453192	-1.64161	0.100671	NA
NM_001271423	16.6252	-0.743966	0.453192	-1.64161	0.100671	NA
NM_001271424	16.6252	-0.743966	0.453192	-1.64161	0.100671	NA
NM_007425	16.6252	-0.743966	0.453192	-1.64161	0.100671	NA
NR_073173	16.6252	-0.743966	0.453192	-1.64161	0.100671	NA
NR_073175	16.6252	-0.743966	0.453192	-1.64161	0.100671	NA
NR_073176	16.6252	-0.743966	0.453192	-1.64161	0.100671	NA
NM_177305	415.32	-0.742378	0.309522	-2.39847	0.0164638	0.417413
NM_011581	84.4856	-0.74149	0.370853	-1.99941	0.0455636	0.497508
NM_001286483	74.0514	-0.741173	0.333322	-2.22359	0.0261758	0.4526
NM_019704	111.452	-0.741146	0.289656	-2.55871	0.0105061	0.393022
NM_026431	54.3739	-0.739509	0.313655	-2.35771	0.018388	0.434768
NM_023824	12.8346	-0.738603	0.483408	-1.52791	0.126535	NA
NM_026900	46.9024	-0.737202	0.388223	-1.89892	0.0575755	0.519633
NM_001033225	551.037	-0.736286	0.267696	-2.75046	0.00595114	0.348571
NM_001082552	56.8196	-0.734938	0.38684	-1.89985	0.0574527	0.519492
NM_009277	56.8196	-0.734938	0.38684	-1.89985	0.0574527	0.519492
NM_145471	197.016	-0.734635	0.288869	-2.54314	0.010986	0.396067
NM_011579	17.1243	-0.73442	0.484855	-1.51472	0.129843	NA
NR_027236	8.82821	-0.7343	0.499855	-1.46903	0.141825	NA
NM_198103	209.807	-0.733689	0.227344	-3.22721	0.00125002	0.204
NM_016974	29.9386	-0.733547	0.357856	-2.04984	0.04038	NA
NM_010262	56.0526	-0.73119	0.310004	-2.35865	0.0183417	0.434486
NM_198000	21.232	-0.730941	0.425771	-1.71675	0.0860254	NA
NR_033219	67.2501	-0.730578	0.281964	-2.59104	0.00956875	0.378751
NM_015789	11.1346	-0.729851	0.497077	-1.46829	0.142027	NA
NM_001271002	9.407	-0.729424	0.51413	-1.41875	0.155971	NA
NM_020014	9.407	-0.729424	0.51413	-1.41875	0.155971	NA
NM_025404	67.0539	-0.729421	0.337912	-2.15861	0.0308805	0.462857
NM_001193619	95.3597	-0.729308	0.329357	-2.21434	0.0268055	0.455734
NM_016887	94.7445	-0.728653	0.327508	-2.22484	0.0260918	0.4526
NM_133968	102.271	-0.728432	0.300544	-2.42371	0.0153629	0.415565
NR_029452	26.722	-0.727656	0.403411	-1.80376	0.0712693	NA
NM_001136063	9.48746	-0.727577	0.514532	-1.41406	0.157346	NA
NM_001271001	9.48746	-0.727577	0.514532	-1.41406	0.157346	NA
NM_001271433	70.0157	-0.725013	0.331299	-2.1884	0.0286406	0.461944
NM_001271434	70.0157	-0.725013	0.331299	-2.1884	0.0286406	0.461944
NM_001271436	70.0157	-0.725013	0.331299	-2.1884	0.0286406	0.461944
NM_001271437	70.0157	-0.725013	0.331299	-2.1884	0.0286406	0.461944
NM_001164823	25.944	-0.72499	0.369497	-1.9621	0.0497507	NA
NM_025339	25.944	-0.72499	0.369497	-1.9621	0.0497507	NA
NR_015519	48.0317	-0.724478	0.33375	-2.17072	0.0299523	0.462857
NM_013642	616.286	-0.724374	0.300926	-2.40715	0.0160777	0.415565
NM_010150	235.34	-0.723752	0.303744	-2.38277	0.0171829	0.422056
NM_028028	224.766	-0.723479	0.268199	-2.69754	0.00698533	0.352867
NM_001008423	17.9076	-0.723278	0.378897	-1.9089	0.0562747	NA
NM_010808	21.5923	-0.723104	0.395955	-1.82623	0.0678161	NA
NM_010893	95.6374	-0.722677	0.249346	-2.89829	0.00375205	0.317437
NM_007988	2298.86	-0.722669	0.284327	-2.54168	0.011032	0.396067
NM_001164225	43.0633	-0.722286	0.348839	-2.07054	0.0384014	0.487342
NM_177648	56.3914	-0.722195	0.31421	-2.29844	0.0215366	0.441926
NM_133223	31.4573	-0.722114	0.345417	-2.09056	0.0365679	NA
NM_001163689	62.7768	-0.722113	0.374645	-1.92746	0.0539223	0.511703
NM_025802	62.7768	-0.722113	0.374645	-1.92746	0.0539223	0.511703
NR_028142	62.7768	-0.722113	0.374645	-1.92746	0.0539223	0.511703
NM_001205227	67.6214	-0.721795	0.315499	-2.28779	0.0221496	0.441926
NM_177216	67.6214	-0.721795	0.315499	-2.28779	0.0221496	0.441926
NM_177721	232.327	-0.721726	0.261791	-2.75688	0.00583564	0.346017
NM_011289	1052.33	-0.721668	0.263537	-2.7384	0.00617394	0.348571
NM_010175	87.4349	-0.721014	0.310513	-2.32201	0.0202324	0.440437
NM_032397	39.6601	-0.72082	0.321003	-2.24552	0.0247346	0.446974
NM_007931	33.4836	-0.72051	0.388382	-1.85516	0.0635735	NA
NM_001256520	726.002	-0.720495	0.210806	-3.41781	0.00063128	0.141285
NM_008003	17.1593	-0.719872	0.42828	-1.68084	0.0927934	NA
NM_175452	33.8466	-0.719319	0.34744	-2.07034	0.0384203	NA
NM_172835	38.2553	-0.717907	0.346277	-2.07322	0.0381521	0.487342
NM_144526	188.431	-0.716799	0.311295	-2.30264	0.0212991	0.441041
NM_020619	80.9948	-0.716688	0.294646	-2.43237	0.0150004	0.415565
NM_029751	801.765	-0.716474	0.275728	-2.59848	0.00936366	0.377576
NM_001033271	504.558	-0.715992	0.222612	-3.21632	0.00129847	0.204
NM_001310505	504.558	-0.715992	0.222612	-3.21632	0.00129847	0.204
NM_001310506	504.558	-0.715992	0.222612	-3.21632	0.00129847	0.204
NM_001310507	504.558	-0.715992	0.222612	-3.21632	0.00129847	0.204
NM_001024699	157.56	-0.715722	0.226164	-3.16461	0.00155293	0.223897
NM_001290183	387.08	-0.715111	0.258419	-2.76725	0.00565313	0.346017
NM_007837	387.08	-0.715111	0.258419	-2.76725	0.00565313	0.346017
NM_001285441	27.988	-0.713832	0.337558	-2.11469	0.0344562	NA
NM_031380	14.9074	-0.713684	0.475679	-1.50035	0.133525	NA
NM_001271724	133.41	-0.713433	0.267245	-2.66958	0.00759458	0.363501
NM_013677	133.41	-0.713433	0.267245	-2.66958	0.00759458	0.363501
NR_073420	133.41	-0.713433	0.267245	-2.66958	0.00759458	0.363501
NM_011975	1652.89	-0.71325	0.235685	-3.02628	0.00247583	0.251631
NM_001099632	25.4382	-0.712906	0.326296	-2.18485	0.0288999	NA
NM_021560	11.7615	-0.71251	0.497987	-1.43078	0.152494	NA
NM_026897	68.0458	-0.711393	0.329133	-2.16142	0.0306631	0.462857
NM_001101464	47.2726	-0.711256	0.302039	-2.35485	0.0185302	0.434931
NM_011292	1233.76	-0.710863	0.262527	-2.70778	0.00677359	0.352867
NR_028384	14.5706	-0.710777	0.483219	-1.47092	0.141313	NA
NM_027402	19.0126	-0.709744	0.48431	-1.46547	0.142792	NA
NM_010479	9.27121	-0.70896	0.517929	-1.36884	0.17105	NA
NM_001081320	101.136	-0.708866	0.312515	-2.26827	0.023313	0.442815
NM_028061	101.136	-0.708866	0.312515	-2.26827	0.023313	0.442815
NM_025919	779.942	-0.708493	0.256185	-2.76556	0.00568257	0.346017
NM_001177656	53.6154	-0.70822	0.452964	-1.56353	0.117929	0.573435
NM_001177657	53.6154	-0.70822	0.452964	-1.56353	0.117929	0.573435
NM_008169	53.6154	-0.70822	0.452964	-1.56353	0.117929	0.573435
NM_016738	884.013	-0.70782	0.261454	-2.70725	0.00678431	0.352867
NM_007623	223.471	-0.706882	0.312355	-2.26307	0.0236313	0.442815
NM_144913	425.002	-0.70637	0.267385	-2.64177	0.00824738	0.366687
NM_177897	321.131	-0.706347	0.314746	-2.24418	0.0248209	0.446974
NM_001286481	81.7074	-0.706261	0.345262	-2.04558	0.0407977	0.493498
NM_001286482	81.7074	-0.706261	0.345262	-2.04558	0.0407977	0.493498
NM_001033865	1200.78	-0.706237	0.258262	-2.73458	0.00624602	0.349587
NM_024277	1200.78	-0.706237	0.258262	-2.73458	0.00624602	0.349587
NM_010921	17.7177	-0.706121	0.43836	-1.61082	0.107219	NA
NM_207523	853.544	-0.705975	0.256735	-2.74982	0.0059628	0.348571
NM_022657	11.6578	-0.704574	0.468404	-1.5042	0.13253	NA
NM_177420	1691.72	-0.702421	0.160956	-4.36406	1.27673e-05	0.0109329
NM_019639	839.216	-0.701327	0.278612	-2.51722	0.0118284	0.398075
NM_001085498	162.91	-0.700709	0.314515	-2.22791	0.0258867	0.451656
NM_001205339	1680.82	-0.700705	0.160695	-4.36046	1.29788e-05	0.0109329
NM_011295	1881.75	-0.700577	0.265688	-2.63684	0.00836814	0.367113
NM_011956	178.568	-0.700539	0.283327	-2.47254	0.0134156	0.414265
NM_146075	446.032	-0.700439	0.255149	-2.74521	0.00604717	0.348571
NM_028602	235.006	-0.699073	0.325778	-2.14586	0.0318842	0.467172
NM_001256521	97.3135	-0.698533	0.30657	-2.27854	0.0226944	0.442815
NM_001307934	16.6685	-0.697503	0.424558	-1.64289	0.100405	NA
NM_025592	1038.87	-0.696711	0.245758	-2.83494	0.00458341	0.346017
NM_173430	207.787	-0.696112	0.257393	-2.70447	0.00684136	0.352867
NR_003292	29.7472	-0.695781	0.355934	-1.9548	0.0506066	NA
NM_001303423	31.3093	-0.695723	0.37312	-1.86461	0.0622362	NA
NM_010069	10.7421	-0.69525	0.498125	-1.39573	0.162795	NA
NM_030226	71.4938	-0.693277	0.280895	-2.4681	0.0135832	0.414265
NM_026642	197.035	-0.692961	0.276078	-2.51002	0.0120723	0.399735
NM_010637	662.069	-0.692192	0.319513	-2.1664	0.0302809	0.462857
NM_028419	211.614	-0.69134	0.216519	-3.19298	0.00140814	0.210298
NM_183311	13.4907	-0.691262	0.412619	-1.6753	0.0938748	NA
NM_026689	382.503	-0.691053	0.238196	-2.9012	0.00371741	0.317437
NM_207161	121.774	-0.690374	0.262153	-2.63348	0.00845156	0.367113
NM_176933	401.508	-0.689704	0.215555	-3.19967	0.00137585	0.206958
NR_033450	19.413	-0.689555	0.452852	-1.52269	0.127835	NA
NM_001162492	68.5244	-0.688939	0.330605	-2.08387	0.0371716	0.485025
NM_001162493	68.6102	-0.688929	0.330591	-2.08393	0.0371667	0.485025
NM_015740	121.885	-0.688562	0.263116	-2.61696	0.0088718	0.36812
NM_007682	303.927	-0.688211	0.29532	-2.33039	0.0197857	0.440437
NM_001290569	61.4468	-0.687024	0.294365	-2.33392	0.0195998	0.439098
NM_029377	61.4468	-0.687024	0.294365	-2.33392	0.0195998	0.439098
NM_146035	166.196	-0.686811	0.316216	-2.17197	0.0298581	0.462857
NM_001163282	114.652	-0.686502	0.342999	-2.00147	0.0453421	0.497063
NM_138647	114.652	-0.686502	0.342999	-2.00147	0.0453421	0.497063
NM_001033352	826.392	-0.684595	0.26171	-2.61585	0.0089005	0.368243
NM_010202	785.028	-0.684535	0.289136	-2.36752	0.0179079	0.429524
NM_007426	58.4912	-0.683084	0.395803	-1.72582	0.0843799	0.557848
NM_024215	112.863	-0.682389	0.301057	-2.26664	0.0234122	0.442815
NM_008655	145.882	-0.681685	0.312179	-2.18364	0.0289889	0.462857
NM_001290429	22.642	-0.680909	0.393076	-1.73226	0.0832276	NA
NM_011675	136.428	-0.680422	0.265264	-2.56507	0.0103155	0.391348
NR_073524	52.3396	-0.680176	0.36728	-1.85193	0.0640366	0.536507
NM_001143755	40.4782	-0.679904	0.308364	-2.20488	0.0274626	0.461944
NM_028908	136.898	-0.679025	0.340007	-1.99709	0.045815	0.497508
NM_153388	72.8766	-0.678527	0.296628	-2.28747	0.0221684	0.441926
NM_001164036	191.362	-0.677634	0.30843	-2.19704	0.0280175	0.461944
NM_001164037	191.362	-0.677634	0.30843	-2.19704	0.0280175	0.461944
NM_001164038	191.362	-0.677634	0.30843	-2.19704	0.0280175	0.461944
NM_001164039	191.362	-0.677634	0.30843	-2.19704	0.0280175	0.461944
NM_001164040	191.362	-0.677634	0.30843	-2.19704	0.0280175	0.461944
NM_008529	191.362	-0.677634	0.30843	-2.19704	0.0280175	0.461944
NM_001198560	19.3242	-0.676745	0.483927	-1.39844	0.161979	NA
NM_001198561	19.3242	-0.676745	0.483927	-1.39844	0.161979	NA
NM_001201460	19.3242	-0.676745	0.483927	-1.39844	0.161979	NA
NM_010394	19.3242	-0.676745	0.483927	-1.39844	0.161979	NA
NM_024210	152.791	-0.67667	0.286372	-2.3629	0.0181324	0.433428
NM_172826	317.434	-0.676349	0.261413	-2.58728	0.00967367	0.381494
NM_010744	144.791	-0.674672	0.258773	-2.6072	0.00912856	0.371834
NM_026513	196.642	-0.674586	0.203664	-3.31225	0.000925496	0.180463
NM_138948	19.3681	-0.674493	0.430596	-1.56642	0.117251	NA
NM_173866	942.018	-0.674409	0.204337	-3.30047	0.000965231	0.184329
NM_008826	914.951	-0.674144	0.248904	-2.70845	0.00675992	0.352867
NM_134084	280.758	-0.674068	0.241875	-2.78684	0.00532241	0.346017
NM_013647	503.212	-0.673924	0.310559	-2.17003	0.0300044	0.462857
NM_009131	54.5443	-0.6736	0.29697	-2.26824	0.0233145	0.442815
NM_019742	91.443	-0.673563	0.269727	-2.4972	0.0125177	0.405611
NM_016750	410.457	-0.673276	0.241664	-2.786	0.00533631	0.346017
NM_001163019	230.233	-0.672805	0.264675	-2.54201	0.0110218	0.396067
NM_175287	230.233	-0.672805	0.264675	-2.54201	0.0110218	0.396067
NM_028479	78.5916	-0.672196	0.289261	-2.32384	0.020134	0.440437
NM_010731	689.038	-0.67193	0.226843	-2.9621	0.00305551	0.287085
NM_011267	92.5146	-0.6715	0.33889	-1.98147	0.047539	0.497508
NM_031874	28.4404	-0.671143	0.32686	-2.0533	0.0400432	NA
NM_026160	463.893	-0.671048	0.231263	-2.90167	0.00371179	0.317437
NM_001033908	296.514	-0.67094	0.248159	-2.70367	0.00685787	0.352867
NM_011513	296.514	-0.67094	0.248159	-2.70367	0.00685787	0.352867
NM_153526	1272.57	-0.67052	0.274704	-2.44088	0.0146513	0.415565
NM_008545	11.3351	-0.670489	0.490025	-1.36828	0.171226	NA
NM_011443	1285.97	-0.669479	0.299476	-2.2355	0.0253844	0.450354
NM_053008	10.6561	-0.668891	0.517674	-1.29211	0.196319	NA
NM_133940	225.273	-0.667805	0.287396	-2.32364	0.0201448	0.440437
NM_025349	58.0922	-0.667231	0.2894	-2.30557	0.0211346	0.440437
NM_001001806	223.034	-0.666795	0.294178	-2.26664	0.0234124	0.442815
NM_033477	41.3093	-0.666335	0.376613	-1.76928	0.0768466	0.551692
NM_001168506	255.402	-0.666325	0.287312	-2.31917	0.020386	0.440437
NM_175477	255.402	-0.666325	0.287312	-2.31917	0.020386	0.440437
NM_001163750	143.148	-0.666067	0.307197	-2.16821	0.030143	0.462857
NM_001163751	143.148	-0.666067	0.307197	-2.16821	0.030143	0.462857
NM_008162	318.63	-0.66536	0.254281	-2.61664	0.00888006	0.36812
NM_033325	152.212	-0.66485	0.317807	-2.09199	0.0364391	0.483373
NM_001286944	220.621	-0.664678	0.33732	-1.97047	0.0487846	0.497508
NM_010592	220.621	-0.664678	0.33732	-1.97047	0.0487846	0.497508
NM_022418	11.2435	-0.664515	0.469346	-1.41583	0.156825	NA
NM_011029	2430.65	-0.66354	0.240847	-2.75503	0.0058687	0.346017
NM_020568	8.60147	-0.663431	0.553964	-1.19761	0.23107	NA
NM_145584	124.488	-0.663222	0.335715	-1.97555	0.0482059	0.497508
NM_001164598	793.682	-0.662233	0.176676	-3.7483	0.000178038	0.0852114
NM_175286	138.273	-0.662106	0.2757	-2.40155	0.0163259	0.416231
NM_001037741	306.505	-0.662047	0.254648	-2.59985	0.00932646	0.377576
NR_073523	51.0415	-0.661985	0.366768	-1.80491	0.0710883	0.547343
NM_178901	16.1692	-0.661869	0.387151	-1.70959	0.0873418	NA
NM_001301034	264.491	-0.661796	0.273307	-2.42144	0.0154591	0.415565
NM_008753	264.491	-0.661796	0.273307	-2.42144	0.0154591	0.415565
NR_027857	15.4696	-0.661608	0.399025	-1.65806	0.0973053	NA
NM_080454	39.1531	-0.66048	0.321231	-2.05609	0.0397739	0.49079
NM_001256522	83.1363	-0.660189	0.304819	-2.16584	0.0303234	0.462857
NM_008259	33.9631	-0.659741	0.444985	-1.48261	0.138177	NA
NM_001290432	21.7055	-0.658792	0.399175	-1.65038	0.0988647	NA
NM_146178	21.7055	-0.658792	0.399175	-1.65038	0.0988647	NA
NM_018820	78.197	-0.658335	0.328743	-2.00258	0.0452222	0.497063
NM_001004157	25.4485	-0.657339	0.342403	-1.91979	0.054885	NA
NM_138670	67.4903	-0.656892	0.33304	-1.97241	0.0485624	0.497508
NR_027656	261.908	-0.656643	0.272703	-2.4079	0.0160444	0.415565
NM_145434	49.3619	-0.655878	0.302231	-2.17012	0.0299979	0.462857
NR_015536	2272.43	-0.655855	0.260691	-2.51583	0.0118753	0.398075
NR_027943	2272.43	-0.655855	0.260691	-2.51583	0.0118753	0.398075
NM_007978	34.637	-0.655801	0.35862	-1.82868	0.0674479	NA
NM_001177955	30.6163	-0.655522	0.367171	-1.78533	0.0742074	NA
NM_001177956	30.6163	-0.655522	0.367171	-1.78533	0.0742074	NA
NM_001177957	30.6163	-0.655522	0.367171	-1.78533	0.0742074	NA
NM_001177958	30.6163	-0.655522	0.367171	-1.78533	0.0742074	NA
NM_001177959	30.6163	-0.655522	0.367171	-1.78533	0.0742074	NA
NM_001177960	30.6163	-0.655522	0.367171	-1.78533	0.0742074	NA
NM_007853	759.226	-0.655411	0.213406	-3.0712	0.00213202	0.230247
NM_025317	141.011	-0.655287	0.329124	-1.99101	0.0464803	0.497508
NM_009096	1087.19	-0.654919	0.253234	-2.58623	0.00970331	0.381948
NM_009621	195.778	-0.65353	0.318114	-2.05439	0.0399378	0.491554
NM_001271768	44.0117	-0.652822	0.358171	-1.82266	0.0683556	0.544034
NM_024469	44.0117	-0.652822	0.358171	-1.82266	0.0683556	0.544034
NM_009092	834.82	-0.652233	0.245797	-2.65354	0.00796524	0.365732
NR_030695	25.3106	-0.650972	0.371595	-1.75183	0.079803	NA
NM_023119	2770.27	-0.650897	0.187273	-3.47566	0.000509592	0.126959
NM_030203	65.5505	-0.65087	0.27414	-2.37423	0.0175858	0.424961
NM_201373	135.529	-0.65023	0.406513	-1.59953	0.109703	0.571436
NM_013762	5690.7	-0.649805	0.243349	-2.67026	0.00757935	0.363501
NM_001081205	22.8099	-0.649094	0.339758	-1.91046	0.0560739	NA
NM_010197	195.15	-0.648673	0.35151	-1.84539	0.064981	0.538232
NR_030696	26.2597	-0.648467	0.340615	-1.90381	0.0569346	NA
NM_001271777	5.89412	-0.64824	0.527302	-1.22935	0.218939	NA
NM_001081069	34.074	-0.648075	0.374191	-1.73194	0.0832848	NA
NM_010756	853.639	-0.647869	0.227263	-2.85075	0.00436161	0.345305
NM_011746	150.806	-0.647848	0.274479	-2.36028	0.0182611	0.433557
NM_133229	27.4061	-0.647711	0.390727	-1.65771	0.0973766	NA
NM_018798	259.653	-0.647588	0.261758	-2.47399	0.0133612	0.414265
NM_007808	92.1729	-0.647171	0.291134	-2.22293	0.0262202	0.4526
NM_008126	211.666	-0.646939	0.256967	-2.51759	0.011816	0.398075
NM_029662	53.7349	-0.646739	0.355262	-1.82046	0.0686894	0.544034
NM_001277925	18.2321	-0.646535	0.487958	-1.32498	0.185177	NA
NM_001204130	8.80132	-0.646069	0.476788	-1.35505	0.175403	NA
NM_030080	17.1715	-0.645894	0.423437	-1.52536	0.12717	NA
NM_028492	8.73007	-0.645698	0.500029	-1.29132	0.196592	NA
NM_030251	171.404	-0.645508	0.264845	-2.43731	0.0147971	0.415565
NM_026094	34.4454	-0.64546	0.37714	-1.71146	0.0869962	NA
NM_021306	18.3052	-0.645416	0.488663	-1.32078	0.186575	NA
NM_008700	10.7044	-0.644541	0.556639	-1.15792	0.246898	NA
NM_026869	265.759	-0.644455	0.249402	-2.584	0.00976609	0.382666
NR_040398	16.3438	-0.644421	0.437237	-1.47385	0.140522	NA
NM_198632	96.7178	-0.644302	0.371532	-1.73418	0.0828865	0.557848
NM_001199249	240.906	-0.64374	0.270195	-2.3825	0.0171957	0.422056
NM_026878	189.599	-0.643533	0.280669	-2.29285	0.0218566	0.441926
NM_027141	130.92	-0.64346	0.308191	-2.08786	0.03681	0.484385
NR_110508	15.2447	-0.64322	0.411587	-1.56278	0.118104	NA
NR_045282	18.1996	-0.643082	0.42088	-1.52795	0.126526	NA
NM_011795	75.3758	-0.643043	0.360437	-1.78407	0.0744131	0.551646
NM_174987	73.1164	-0.643017	0.266961	-2.40866	0.0160112	0.415565
NM_001190886	26.6588	-0.642701	0.429686	-1.49575	0.13472	NA
NM_001293767	267.685	-0.642292	0.250516	-2.56388	0.010351	0.391348
NM_133231	59.6884	-0.642078	0.367613	-1.74661	0.0807043	0.555054
NM_001010825	33.5585	-0.641699	0.363062	-1.76746	0.0771505	NA
NM_009579	275.492	-0.641443	0.274343	-2.3381	0.0193818	0.438412
NM_020625	147.706	-0.641233	0.291624	-2.19884	0.0278896	0.461944
NM_011287	1376.28	-0.641204	0.282248	-2.27178	0.0231	0.442815
NM_001166164	13.1349	-0.641011	0.492864	-1.30058	0.193401	NA
NM_172407	270.512	-0.63993	0.306174	-2.09008	0.0366104	0.483675
NM_029103	442.772	-0.639823	0.229739	-2.785	0.00535276	0.346017
NM_001039115	17.4925	-0.639776	0.376585	-1.69889	0.0893403	NA
NM_153459	89.3531	-0.639775	0.299941	-2.13301	0.0329242	0.471448
NM_173785	127.439	-0.639612	0.290421	-2.20236	0.0276397	0.461944
NM_019822	301.286	-0.639494	0.292398	-2.18707	0.0287376	0.461944
NM_145580	54.8006	-0.639134	0.265734	-2.40517	0.0161651	0.415565
NM_001252089	580.594	-0.639097	0.220708	-2.89567	0.0037835	0.317437
NM_009033	580.594	-0.639097	0.220708	-2.89567	0.0037835	0.317437
NM_028922	38.1108	-0.637518	0.320946	-1.98637	0.046992	0.497508
NM_009335	781.929	-0.637492	0.254174	-2.5081	0.0121383	0.399907
NM_146030	32.5058	-0.637104	0.394203	-1.61618	0.106055	NA
NM_001253751	414.405	-0.636928	0.276312	-2.30511	0.0211607	0.440437
NM_134469	414.405	-0.636928	0.276312	-2.30511	0.0211607	0.440437
NM_001001892	108.364	-0.636581	0.359375	-1.77135	0.0765021	0.551692
NM_001168589	59.6319	-0.636354	0.363968	-1.74838	0.080399	0.554828
NM_025586	1191.55	-0.635918	0.221345	-2.87297	0.00406636	0.326845
NM_022419	31.3747	-0.635673	0.382648	-1.66125	0.0966635	NA
NM_001083887	143.944	-0.635175	0.25133	-2.52725	0.0114959	0.396988
NM_001285783	143.944	-0.635175	0.25133	-2.52725	0.0114959	0.396988
NM_001285784	143.944	-0.635175	0.25133	-2.52725	0.0114959	0.396988
NM_172272	143.944	-0.635175	0.25133	-2.52725	0.0114959	0.396988
NM_175383	31.3495	-0.635174	0.35216	-1.80365	0.0712861	NA
NM_001042407	130.007	-0.635046	0.279393	-2.27295	0.0230292	0.442815
NM_001004293	48.9507	-0.634993	0.409296	-1.55143	0.120799	0.573435
NM_001287093	48.9507	-0.634993	0.409296	-1.55143	0.120799	0.573435
NM_146137	48.9507	-0.634993	0.409296	-1.55143	0.120799	0.573435
NM_009438	2542.1	-0.634331	0.262112	-2.42008	0.0155173	0.415565
NM_001293766	259.625	-0.634256	0.249221	-2.54495	0.0109293	0.396067
NM_015730	35.3869	-0.633965	0.426047	-1.48802	0.136747	NA
NM_001159696	707.581	-0.633355	0.258092	-2.45399	0.014128	0.415565
NM_013527	12.762	-0.632767	0.476741	-1.32728	0.184417	NA
NM_009234	745.912	-0.632684	0.214691	-2.94695	0.0032092	0.290699
NM_011676	104.253	-0.632329	0.318334	-1.98637	0.0469922	0.497508
NM_176785	23.3568	-0.632225	0.405864	-1.55773	0.119298	NA
NM_001035509	17.9455	-0.631543	0.434874	-1.45224	0.146434	NA
NM_001035510	17.9455	-0.631543	0.434874	-1.45224	0.146434	NA
NM_025893	17.9455	-0.631543	0.434874	-1.45224	0.146434	NA
NM_001166476	642.322	-0.631515	0.203855	-3.09787	0.00194918	0.22495
NM_001166477	642.322	-0.631515	0.203855	-3.09787	0.00194918	0.22495
NM_001025427	642.481	-0.631482	0.204006	-3.0954	0.00196547	0.22495
NM_001039356	642.481	-0.631482	0.204006	-3.0954	0.00196547	0.22495
NM_001166535	642.481	-0.631482	0.204006	-3.0954	0.00196547	0.22495
NM_001166536	642.481	-0.631482	0.204006	-3.0954	0.00196547	0.22495
NM_001166537	642.481	-0.631482	0.204006	-3.0954	0.00196547	0.22495
NM_001166539	642.481	-0.631482	0.204006	-3.0954	0.00196547	0.22495
NM_001166540	642.481	-0.631482	0.204006	-3.0954	0.00196547	0.22495
NM_001166541	642.481	-0.631482	0.204006	-3.0954	0.00196547	0.22495
NM_001166542	642.481	-0.631482	0.204006	-3.0954	0.00196547	0.22495
NM_001166543	642.481	-0.631482	0.204006	-3.0954	0.00196547	0.22495
NM_001166544	642.481	-0.631482	0.204006	-3.0954	0.00196547	0.22495
NM_001166545	642.481	-0.631482	0.204006	-3.0954	0.00196547	0.22495
NM_001166546	642.481	-0.631482	0.204006	-3.0954	0.00196547	0.22495
NM_016660	642.481	-0.631482	0.204006	-3.0954	0.00196547	0.22495
NM_178715	37.609	-0.631246	0.330857	-1.90791	0.0564026	0.518174
NM_021462	353.195	-0.630072	0.277547	-2.27015	0.0231987	0.442815
NM_001293623	218.302	-0.629503	0.286581	-2.19659	0.0280495	0.461944
NM_001293624	218.302	-0.629503	0.286581	-2.19659	0.0280495	0.461944
NM_001293625	218.302	-0.629503	0.286581	-2.19659	0.0280495	0.461944
NM_008253	218.302	-0.629503	0.286581	-2.19659	0.0280495	0.461944
NM_026268	1702.3	-0.629446	0.249086	-2.52702	0.0115036	0.396988
NM_145370	221.01	-0.629243	0.301746	-2.08534	0.0370381	0.485025
NM_027952	15.0592	-0.629212	0.427378	-1.47226	0.14095	NA
NM_001305982	98.7593	-0.628371	0.263098	-2.38835	0.0169241	0.418062
NM_008577	1787.04	-0.628302	0.170075	-3.69426	0.000220532	0.08611
NM_026080	295.921	-0.628255	0.223473	-2.81132	0.00493388	0.346017
NM_018772	608.204	-0.628246	0.183198	-3.42933	0.000605077	0.140025
NM_001163131	279.925	-0.62815	0.317144	-1.98064	0.0476313	0.497508
NM_007921	279.925	-0.62815	0.317144	-1.98064	0.0476313	0.497508
NM_026282	312.784	-0.628077	0.210752	-2.98018	0.00288084	0.279574
NM_010772	394.063	-0.627712	0.25687	-2.44369	0.0145378	0.415565
NM_172371	87.2194	-0.626902	0.279915	-2.23962	0.0251156	0.448229
NM_001302342	273.973	-0.62673	0.257634	-2.43264	0.0149893	0.415565
NM_010091	273.973	-0.62673	0.257634	-2.43264	0.0149893	0.415565
NM_001177874	221.669	-0.626562	0.302116	-2.07391	0.0380873	0.487342
NM_001290789	87.858	-0.626402	0.399724	-1.56709	0.117095	0.573435
NM_027917	87.858	-0.626402	0.399724	-1.56709	0.117095	0.573435
NM_001163709	608.965	-0.626362	0.183231	-3.41844	0.000629819	0.141285
NM_001099792	410.266	-0.62545	0.257177	-2.43199	0.0150163	0.415565
NM_001099793	410.266	-0.62545	0.257177	-2.43199	0.0150163	0.415565
NM_177374	410.266	-0.62545	0.257177	-2.43199	0.0150163	0.415565
NM_001170454	270.843	-0.625306	0.201511	-3.10309	0.00191512	0.22495
NM_001042504	172.405	-0.625221	0.476728	-1.31148	0.189695	0.616925
NM_001286942	172.405	-0.625221	0.476728	-1.31148	0.189695	0.616925
NM_011098	172.405	-0.625221	0.476728	-1.31148	0.189695	0.616925
NM_001034895	99.0811	-0.625054	0.390172	-1.60199	0.109157	0.571436
NR_027819	1600.1	-0.624989	0.246509	-2.53536	0.011233	0.396988
NR_027820	1600.1	-0.624989	0.246509	-2.53536	0.011233	0.396988
NR_027821	1600.1	-0.624989	0.246509	-2.53536	0.011233	0.396988
NM_178643	54.9516	-0.624932	0.311261	-2.00774	0.0446709	0.496586
NM_013721	915.675	-0.624498	0.302363	-2.06539	0.0388863	0.487421
NM_026436	24.8488	-0.624322	0.43253	-1.44342	0.148903	NA
NM_175478	30.5181	-0.623865	0.416196	-1.49897	0.133882	NA
NR_029468	1495.15	-0.623533	0.288105	-2.16426	0.0304446	0.462857
NM_001163145	27.8804	-0.623401	0.410261	-1.51952	0.128631	NA
NM_023418	753.416	-0.622846	0.181916	-3.42381	0.000617499	0.141285
NM_021441	195.073	-0.622105	0.26913	-2.31154	0.0208032	0.440437
NM_026824	515.782	-0.621825	0.264899	-2.3474	0.0189047	0.435049
NM_001195268	192.177	-0.620896	0.300464	-2.06646	0.0387852	0.487421
NR_028378	29.4377	-0.620663	0.362206	-1.71356	0.0866087	NA
NM_146094	656.684	-0.620338	0.243528	-2.5473	0.010856	0.396067
NM_138753	499.642	-0.620304	0.27412	-2.26289	0.0236424	0.442815
NM_001033533	147.525	-0.619767	0.276117	-2.24458	0.0247949	0.446974
NM_148934	279.876	-0.619727	0.229613	-2.69901	0.00695458	0.352867
NM_009144	48.8002	-0.618827	0.349719	-1.7695	0.0768111	0.551692
NR_028486	23.0808	-0.618427	0.405118	-1.52653	0.126877	NA
NR_028487	23.0808	-0.618427	0.405118	-1.52653	0.126877	NA
NM_011290	1584.36	-0.617937	0.231456	-2.66978	0.0075901	0.363501
NM_001168588	51.2951	-0.617931	0.370922	-1.66593	0.0957267	0.566585
NM_009760	584.149	-0.617892	0.308898	-2.00031	0.0454666	0.497508
NM_001307935	15.5071	-0.617634	0.437818	-1.41071	0.15833	NA
NM_026014	590.504	-0.616071	0.249164	-2.47255	0.0134151	0.414265
NM_016957	725.66	-0.615488	0.266359	-2.31074	0.0208471	0.440437
NM_153088	177.057	-0.615451	0.253745	-2.42547	0.0152886	0.415565
NM_001308227	314.059	-0.615372	0.252501	-2.43711	0.0148052	0.415565
NM_027980	239.632	-0.61507	0.265363	-2.31785	0.0204575	0.440437
NM_145582	99.9979	-0.614993	0.33484	-1.83668	0.0662575	0.542924
NM_011522	31.8309	-0.614507	0.346351	-1.77423	0.0760246	NA
NM_010062	98.8169	-0.614361	0.258768	-2.37417	0.0175882	0.424961
NM_001291857	79.4929	-0.614252	0.305622	-2.00984	0.0444483	0.496586
NM_009636	79.4929	-0.614252	0.305622	-2.00984	0.0444483	0.496586
NM_183358	150.922	-0.613646	0.28258	-2.17158	0.0298872	0.462857
NM_009577	335.258	-0.613541	0.233673	-2.62564	0.00864863	0.367113
NM_001291045	47.9189	-0.613418	0.28325	-2.16564	0.0303386	0.462857
NR_015586	47.3111	-0.613195	0.296994	-2.06467	0.0389539	0.487421
NM_146125	88.8035	-0.612449	0.325272	-1.88288	0.0597161	0.522026
NM_146201	964.936	-0.612106	0.247872	-2.46944	0.0135325	0.414265
NM_012006	177.474	-0.611753	0.297398	-2.05702	0.0396845	0.49079
NM_001025617	383.849	-0.611539	0.26431	-2.31372	0.0206832	0.440437
NM_001025618	383.849	-0.611539	0.26431	-2.31372	0.0206832	0.440437
NM_001267592	383.849	-0.611539	0.26431	-2.31372	0.0206832	0.440437
NM_029502	383.849	-0.611539	0.26431	-2.31372	0.0206832	0.440437
NM_009085	448.453	-0.611273	0.230285	-2.65442	0.00794458	0.365732
NM_001168624	5.22521	-0.611267	0.556327	-1.09875	0.271875	NA
NM_198614	5.22521	-0.611267	0.556327	-1.09875	0.271875	NA
NM_197992	51.8299	-0.611261	0.278257	-2.19675	0.0280383	0.461944
NM_010807	625.503	-0.610912	0.292706	-2.08712	0.0368771	0.484463
NM_001114637	176.413	-0.610658	0.205095	-2.97744	0.00290667	0.280787
NM_008239	17.0595	-0.610624	0.473905	-1.2885	0.197573	NA
NM_172610	88.974	-0.610573	0.259501	-2.35288	0.0186288	0.434931
NM_026654	167.622	-0.610011	0.264816	-2.30353	0.0212492	0.440874
NM_019959	10.6323	-0.609836	0.46382	-1.31481	0.188574	NA
NM_001009929	94.9373	-0.60979	0.264225	-2.30784	0.0210081	0.440437
NM_001009930	94.9373	-0.60979	0.264225	-2.30784	0.0210081	0.440437
NM_001276763	94.9373	-0.60979	0.264225	-2.30784	0.0210081	0.440437
NM_029426	94.9373	-0.60979	0.264225	-2.30784	0.0210081	0.440437
NM_001042502	164.993	-0.609534	0.479295	-1.27173	0.203469	0.623209
NM_001287048	164.993	-0.609534	0.479295	-1.27173	0.203469	0.623209
NM_130858	11.1513	-0.609488	0.508726	-1.19807	0.23089	NA
NM_028900	161.692	-0.609473	0.272795	-2.23418	0.025471	0.45113
NM_001166474	95.6416	-0.609099	0.329683	-1.84753	0.0646709	0.537541
NM_026353	96.6634	-0.608969	0.277912	-2.19123	0.0284348	0.461944
NM_001291235	112.924	-0.608912	0.307654	-1.97921	0.0477923	0.497508
NM_001291237	112.924	-0.608912	0.307654	-1.97921	0.0477923	0.497508
NM_027090	118.715	-0.608398	0.256263	-2.37412	0.0175909	0.424961
NM_023815	191.051	-0.60836	0.223422	-2.72292	0.00647081	0.350982
NM_009238	562.766	-0.60822	0.261225	-2.32833	0.0198944	0.440437
NM_025884	208.807	-0.607817	0.248905	-2.44197	0.0146075	0.415565
NM_001145406	7.47778	-0.607717	0.498169	-1.2199	0.222502	NA
NM_001289670	36.1081	-0.607612	0.390923	-1.5543	0.120112	0.573435
NM_001289682	36.1081	-0.607612	0.390923	-1.5543	0.120112	0.573435
NM_178252	36.1081	-0.607612	0.390923	-1.5543	0.120112	0.573435
NM_001293763	277.953	-0.60705	0.24764	-2.45134	0.0142327	0.415565
NM_001293768	277.953	-0.60705	0.24764	-2.45134	0.0142327	0.415565
NM_021501	452.032	-0.606532	0.231297	-2.62231	0.0087337	0.367113
NM_001038703	23.8559	-0.606274	0.445885	-1.35971	0.173922	NA
NR_024068	1916.6	-0.606206	0.245514	-2.46913	0.0135442	0.414265
NM_001004145	12.256	-0.606181	0.500611	-1.21088	0.22594	NA
NM_019998	207.17	-0.60605	0.248961	-2.43432	0.0149199	0.415565
NM_173427	63.7983	-0.605487	0.427144	-1.41753	0.156329	0.598182
NM_145822	103.617	-0.60534	0.260551	-2.32331	0.0201627	0.440437
NR_029447	183.337	-0.605091	0.314679	-1.92288	0.0544946	0.511703
NM_001290837	633.074	-0.604465	0.218415	-2.7675	0.00564877	0.346017
NM_011354	633.074	-0.604465	0.218415	-2.7675	0.00564877	0.346017
NR_110986	633.074	-0.604465	0.218415	-2.7675	0.00564877	0.346017
NM_029096	51.6107	-0.604115	0.298473	-2.02401	0.0429687	0.495962
NM_133908	51.6107	-0.604115	0.298473	-2.02401	0.0429687	0.495962
NM_019566	209.346	-0.603997	0.235362	-2.56624	0.0102807	0.390796
NM_001291236	106.618	-0.603919	0.306121	-1.97281	0.0485168	0.497508
NM_026708	106.618	-0.603919	0.306121	-1.97281	0.0485168	0.497508
NM_001289558	504.65	-0.603917	0.164673	-3.66736	0.000245064	0.08611
NM_001289559	504.65	-0.603917	0.164673	-3.66736	0.000245064	0.08611
NM_001289560	504.65	-0.603917	0.164673	-3.66736	0.000245064	0.08611
NM_153540	504.65	-0.603917	0.164673	-3.66736	0.000245064	0.08611
NM_033077	110.375	-0.603244	0.322857	-1.86846	0.0616987	0.52844
NM_178444	89.6945	-0.602815	0.333674	-1.8066	0.0708252	0.547053
NM_001270791	49.7674	-0.602404	0.333937	-1.80394	0.0712401	0.547343
NM_001002272	276.148	-0.602361	0.256313	-2.3501	0.0187682	0.434931
NM_001290770	276.148	-0.602361	0.256313	-2.3501	0.0187682	0.434931
NM_001290771	276.148	-0.602361	0.256313	-2.3501	0.0187682	0.434931
NM_001290772	276.148	-0.602361	0.256313	-2.3501	0.0187682	0.434931
NM_019548	276.148	-0.602361	0.256313	-2.3501	0.0187682	0.434931
NM_146162	13.2132	-0.602246	0.537129	-1.12123	0.262189	NA
NM_145391	17.5346	-0.601949	0.460657	-1.30672	0.191309	NA
NM_009647	2916.9	-0.601929	0.223006	-2.69916	0.00695141	0.352867
NM_145070	569.855	-0.601909	0.218032	-2.76065	0.00576863	0.346017
NM_001177604	2917.69	-0.601759	0.22304	-2.69799	0.00697604	0.352867
NM_001177605	2917.69	-0.601759	0.22304	-2.69799	0.00697604	0.352867
NM_001177602	2917.76	-0.60175	0.223081	-2.69745	0.0069873	0.352867
NM_173383	39.8664	-0.601389	0.34611	-1.73756	0.0822878	0.556844
NM_018808	327.758	-0.601247	0.255787	-2.35057	0.0187445	0.434931
NM_019641	511.843	-0.601235	0.205972	-2.91901	0.00351141	0.309401
NM_001001565	98.5896	-0.600674	0.312422	-1.92263	0.054526	0.511703
NM_001001566	98.5896	-0.600674	0.312422	-1.92263	0.054526	0.511703
NM_008841	199.029	-0.599855	0.249107	-2.40802	0.0160394	0.415565
NM_011627	103.062	-0.599062	0.256438	-2.33609	0.0194867	0.439098
NM_029057	17.2372	-0.599013	0.441526	-1.35669	0.174881	NA
NM_177910	94.6815	-0.598943	0.264497	-2.26446	0.023546	0.442815
NM_175381	421.814	-0.598604	0.295775	-2.02385	0.0429853	0.495962
NM_001085513	29.6479	-0.59855	0.363679	-1.64582	0.0998007	NA
NM_013796	180.679	-0.598449	0.223385	-2.67901	0.00738408	0.36325
NR_027804	180.679	-0.598449	0.223385	-2.67901	0.00738408	0.36325
NM_028973	327.471	-0.598407	0.282537	-2.11797	0.0341772	0.477487
NM_023279	171.728	-0.597696	0.247344	-2.41646	0.0156722	0.415565
NR_040401	63.1683	-0.597654	0.294697	-2.02803	0.0425571	0.4951
NM_078477	338.572	-0.597609	0.21926	-2.72557	0.00641913	0.350982
NR_003513	1458.15	-0.597564	0.223114	-2.67829	0.00739989	0.36325
NM_001014761	30.0294	-0.597451	0.422575	-1.41383	0.15741	NA
NM_008842	966.616	-0.597429	0.258352	-2.31247	0.0207519	0.440437
NM_009213	67.7906	-0.597219	0.301355	-1.98178	0.0475041	0.497508
NM_198599	18.2542	-0.596966	0.401089	-1.48836	0.136655	NA
NM_010840	589.139	-0.596422	0.227106	-2.62619	0.00863469	0.367113
NM_025886	104.909	-0.596278	0.275956	-2.16077	0.0307128	0.462857
NM_001204979	1451.4	-0.595904	0.126377	-4.71529	2.41362e-06	0.00277276
NM_011319	1451.4	-0.595904	0.126377	-4.71529	2.41362e-06	0.00277276
NM_153597	25.4005	-0.595878	0.371446	-1.60421	0.108667	NA
NR_027351	25.4005	-0.595878	0.371446	-1.60421	0.108667	NA
NM_001081192	62.0807	-0.595668	0.346041	-1.72138	0.0851816	0.558866
NM_010591	651.78	-0.595563	0.450511	-1.32197	0.186178	0.614513
NM_198724	89.1004	-0.594815	0.33301	-1.78618	0.0740707	0.551646
NM_198725	89.1004	-0.594815	0.33301	-1.78618	0.0740707	0.551646
NM_011952	103.117	-0.594779	0.233008	-2.55262	0.0106917	0.396067
NM_001012477	46.1031	-0.594553	0.384104	-1.5479	0.121647	0.573435
NM_013655	46.1031	-0.594553	0.384104	-1.5479	0.121647	0.573435
NM_008004	55.2951	-0.594537	0.247303	-2.40408	0.0162132	0.415577
NM_001160012	244.551	-0.594355	0.253928	-2.34065	0.0192504	0.436878
NM_144509	129.866	-0.594129	0.31723	-1.87286	0.0610873	0.526988
NM_001164564	88.4121	-0.594022	0.333584	-1.78072	0.0749575	0.551646
NR_036582	218.564	-0.593934	0.294409	-2.01738	0.0436563	0.496586
NM_001164792	102.182	-0.593789	0.25664	-2.3137	0.0206841	0.440437
NM_172397	133.502	-0.593624	0.347683	-1.70737	0.0877531	0.559823
NM_029720	254.714	-0.593325	0.25264	-2.3485	0.0188491	0.435049
NM_017467	169.607	-0.593166	0.348144	-1.70379	0.0884199	0.559823
NM_001013385	48.1616	-0.592533	0.281955	-2.10152	0.0355956	0.483373
NM_018742	207.778	-0.591574	0.272725	-2.16912	0.0300733	0.462857
NM_001177307	1102.76	-0.590894	0.23512	-2.51316	0.0119655	0.398075
NM_001033485	39.7963	-0.590788	0.395335	-1.4944	0.135071	0.585014
NM_001305652	78.4112	-0.590653	0.251002	-2.35318	0.0186138	0.434931
NM_025784	78.4112	-0.590653	0.251002	-2.35318	0.0186138	0.434931
NM_007438	1102.84	-0.590532	0.235093	-2.51191	0.012008	0.398232
NM_133964	206.934	-0.59027	0.281611	-2.09604	0.0360782	0.483373
NM_001290423	17.8172	-0.589853	0.427653	-1.37928	0.167808	NA
NM_030887	450.881	-0.589781	0.323005	-1.82592	0.0678626	0.544034
NM_001302451	236.137	-0.589707	0.241445	-2.4424	0.0145899	0.415565
NM_001302457	236.137	-0.589707	0.241445	-2.4424	0.0145899	0.415565
NM_001302460	236.137	-0.589707	0.241445	-2.4424	0.0145899	0.415565
NR_040399	17.2054	-0.589078	0.42733	-1.37851	0.168046	NA
NR_131019	18.0886	-0.588788	0.416496	-1.41367	0.157458	NA
NM_001190466	305.249	-0.587911	0.280079	-2.09909	0.0358089	0.483373
NM_021532	305.249	-0.587911	0.280079	-2.09909	0.0358089	0.483373
NR_003188	293.437	-0.587755	0.26603	-2.20935	0.02715	0.459097
NM_007590	385.152	-0.587078	0.258241	-2.27338	0.0230034	0.442815
NM_001079901	108.127	-0.586579	0.349283	-1.67938	0.0930785	0.565863
NM_001079902	108.127	-0.586579	0.349283	-1.67938	0.0930785	0.565863
NM_001079903	108.127	-0.586579	0.349283	-1.67938	0.0930785	0.565863
NM_001079904	108.127	-0.586579	0.349283	-1.67938	0.0930785	0.565863
NM_001079905	108.127	-0.586579	0.349283	-1.67938	0.0930785	0.565863
NM_175099	108.127	-0.586579	0.349283	-1.67938	0.0930785	0.565863
NM_029872	673.458	-0.586352	0.265585	-2.20777	0.02726	0.46036
NM_001302458	236.499	-0.586234	0.241423	-2.42825	0.0151721	0.415565
NM_001005916	224.05	-0.586184	0.247455	-2.36885	0.0178434	0.428913
NM_001205052	451.341	-0.586029	0.322949	-1.81461	0.0695831	0.545243
NM_011919	233.633	-0.585963	0.24194	-2.42193	0.0154383	0.415565
NM_145968	21.4694	-0.585726	0.379677	-1.5427	0.122905	NA
NM_001205053	447.997	-0.585653	0.322129	-1.81807	0.0690537	0.544034
NM_001306143	596.298	-0.585503	0.223205	-2.62316	0.00871181	0.367113
NM_013595	596.298	-0.585503	0.223205	-2.62316	0.00871181	0.367113
NM_001024539	95.367	-0.584906	0.259661	-2.25257	0.0242861	0.44396
NM_001034874	304.971	-0.584687	0.259933	-2.24938	0.0244885	0.446459
NM_001243586	232.198	-0.58431	0.221262	-2.64081	0.00827088	0.366687
NM_027162	232.198	-0.58431	0.221262	-2.64081	0.00827088	0.366687
NM_025324	34.0083	-0.584048	0.364866	-1.60072	0.109439	NA
NM_001177308	1114.79	-0.582692	0.234684	-2.48288	0.0130326	0.412712
NM_138950	368.314	-0.582679	0.251796	-2.31409	0.0206628	0.440437
NM_001164259	233.69	-0.582392	0.327437	-1.77864	0.0752989	0.551646
NM_054071	233.69	-0.582392	0.327437	-1.77864	0.0752989	0.551646
NM_001290706	23.8734	-0.582295	0.398771	-1.46022	0.144229	NA
NM_025452	23.8734	-0.582295	0.398771	-1.46022	0.144229	NA
NM_133881	23.8734	-0.582295	0.398771	-1.46022	0.144229	NA
NM_026988	363.991	-0.5822	0.277336	-2.09926	0.0357943	0.483373
NM_029809	137.051	-0.582179	0.285005	-2.0427	0.0410824	0.493498
NM_027404	134.905	-0.581589	0.309446	-1.87945	0.0601828	0.523714
NM_153142	149.952	-0.58149	0.280251	-2.07489	0.037997	0.487342
NM_007591	1551.51	-0.581369	0.227269	-2.55806	0.0105256	0.393022
NM_001166397	124.19	-0.580373	0.318057	-1.82474	0.0680399	0.544034
NM_001166398	124.19	-0.580373	0.318057	-1.82474	0.0680399	0.544034
NM_026139	124.19	-0.580373	0.318057	-1.82474	0.0680399	0.544034
NM_001168488	132.057	-0.580315	0.289113	-2.00723	0.0447255	0.496586
NM_001168489	132.057	-0.580315	0.289113	-2.00723	0.0447255	0.496586
NM_001168490	132.057	-0.580315	0.289113	-2.00723	0.0447255	0.496586
NM_008583	132.057	-0.580315	0.289113	-2.00723	0.0447255	0.496586
NM_010828	339.596	-0.58023	0.247688	-2.34259	0.0191507	0.436465
NM_001243584	234.578	-0.580103	0.220327	-2.63291	0.00846556	0.367113
NM_001243587	234.578	-0.580103	0.220327	-2.63291	0.00846556	0.367113
NM_001081643	11.4885	-0.579635	0.520572	-1.11346	0.265512	NA
NM_011066	120.403	-0.579613	0.24256	-2.38956	0.0168685	0.418062
NR_033505	127.511	-0.579588	0.245281	-2.36296	0.0181297	0.433428
NM_001033481	325.991	-0.579267	0.290632	-1.99313	0.0462475	0.497508
NR_027956	120.325	-0.579131	0.306373	-1.89028	0.0587202	0.519803
NM_028733	54.5464	-0.579059	0.324756	-1.78306	0.0745771	0.551646
NM_153762	130.387	-0.578676	0.26627	-2.17327	0.0297603	0.462857
NM_026740	77.3129	-0.57863	0.316409	-1.82874	0.0674382	0.544034
NM_011352	57.0005	-0.578469	0.253004	-2.2864	0.0222306	0.442072
NM_181328	34.0057	-0.578414	0.351093	-1.64747	0.0994622	NA
NM_023184	261.421	-0.578002	0.300298	-1.92476	0.0542594	0.511703
NM_011172	336.055	-0.577707	0.207628	-2.78242	0.00539556	0.346017
NR_029382	1254.76	-0.577321	0.233847	-2.4688	0.0135568	0.414265
NR_024329	627.858	-0.577197	0.254594	-2.26712	0.0233826	0.442815
NM_021453	17.6598	-0.577191	0.393054	-1.46848	0.141975	NA
NM_026069	1060.13	-0.576429	0.239217	-2.40965	0.0159679	0.415565
NM_001177627	12.3326	-0.57628	0.464464	-1.24074	0.214701	NA
NM_172659	12.3326	-0.57628	0.464464	-1.24074	0.214701	NA
NM_178926	88.3938	-0.576085	0.327919	-1.75679	0.0789536	0.552677
NM_030063	18.0479	-0.575534	0.452281	-1.27252	0.20319	NA
NM_133346	274.405	-0.574678	0.230515	-2.49302	0.0126662	0.406611
NM_001033142	218.746	-0.574657	0.265903	-2.16116	0.0306833	0.462857
NM_001311076	21.556	-0.574478	0.393185	-1.46109	0.143991	NA
NM_001195006	85.0676	-0.574425	0.309164	-1.85799	0.0631702	0.534643
NM_145602	85.0676	-0.574425	0.309164	-1.85799	0.0631702	0.534643
NR_045897	35.8912	-0.574389	0.388675	-1.47781	0.139458	0.588879
NR_024067	1323.59	-0.574334	0.237805	-2.41515	0.0157287	0.415565
NM_001024927	58.1997	-0.574181	0.323583	-1.77445	0.0759894	0.551646
NM_001081641	58.1997	-0.574181	0.323583	-1.77445	0.0759894	0.551646
NM_153419	449.49	-0.573231	0.217524	-2.63525	0.00840744	0.367113
NM_001161798	550.238	-0.572766	0.229453	-2.49622	0.0125524	0.405611
NR_027809	550.238	-0.572766	0.229453	-2.49622	0.0125524	0.405611
NM_011789	59.1272	-0.572475	0.320748	-1.78481	0.0742919	0.551646
NM_001204129	11.8071	-0.572349	0.451406	-1.26793	0.204824	NA
NM_025960	112.736	-0.571986	0.231448	-2.47134	0.0134609	0.414265
NM_029272	271.605	-0.571947	0.21036	-2.7189	0.00654997	0.350982
NM_025944	101.021	-0.571681	0.279244	-2.04724	0.0406341	0.493498
NM_008972	2170.23	-0.571598	0.219797	-2.60057	0.0093068	0.377576
NM_183097	21.1439	-0.571418	0.432679	-1.32065	0.186618	NA
NM_198026	90.5756	-0.570715	0.272761	-2.09236	0.0364059	0.483373
NM_145609	288.399	-0.569991	0.249202	-2.28726	0.0221805	0.441926
NM_145405	90.4587	-0.569943	0.264858	-2.15188	0.0314071	0.465995
NR_045779	90.4587	-0.569943	0.264858	-2.15188	0.0314071	0.465995
NR_002840	5095.46	-0.569816	0.245367	-2.3223	0.0202167	0.440437
NM_027244	290.926	-0.569709	0.24393	-2.33555	0.0195149	0.439098
NM_001145968	12.2259	-0.569665	0.456994	-1.24655	0.212563	NA
NM_001145969	12.2259	-0.569665	0.456994	-1.24655	0.212563	NA
NM_027100	12.2259	-0.569665	0.456994	-1.24655	0.212563	NA
NM_001034881	19.7503	-0.569606	0.428884	-1.32811	0.184141	NA
NM_025440	110.315	-0.569593	0.313221	-1.8185	0.0689872	0.544034
NM_019568	28.7707	-0.569576	0.377016	-1.51075	0.130853	NA
NM_001172205	182.826	-0.569531	0.291576	-1.95329	0.0507857	0.503941
NM_001172206	182.826	-0.569531	0.291576	-1.95329	0.0507857	0.503941
NM_001290726	182.826	-0.569531	0.291576	-1.95329	0.0507857	0.503941
NM_001290727	182.826	-0.569531	0.291576	-1.95329	0.0507857	0.503941
NM_145996	182.826	-0.569531	0.291576	-1.95329	0.0507857	0.503941
NR_033310	182.826	-0.569531	0.291576	-1.95329	0.0507857	0.503941
NM_175451	409.498	-0.569375	0.214792	-2.65082	0.00802975	0.365732
NM_146215	103.472	-0.568897	0.288384	-1.97271	0.0485287	0.497508
NR_028114	80.15	-0.568822	0.283153	-2.00888	0.0445495	0.496586
NM_027136	245.863	-0.568819	0.270928	-2.09952	0.0357707	0.483373
NM_021316	7.74302	-0.568411	0.491297	-1.15696	0.247288	NA
NM_009429	1231.01	-0.568397	0.236355	-2.40485	0.0161791	0.415565
NM_001162925	18.4862	-0.568256	0.423624	-1.34142	0.179786	NA
NM_030094	18.4862	-0.568256	0.423624	-1.34142	0.179786	NA
NR_015587	209.57	-0.567884	0.315008	-1.80276	0.071426	0.547343
NM_052835	940.712	-0.567857	0.252438	-2.24949	0.0244812	0.446459
NM_025650	147.656	-0.567783	0.248206	-2.28755	0.0221637	0.441926
NM_010353	262.618	-0.56739	0.279576	-2.02947	0.0424106	0.494532
NR_110342	398.952	-0.567354	0.250596	-2.26402	0.0235728	0.442815
NM_027204	397.241	-0.56706	0.25073	-2.26164	0.0237198	0.442815
NM_011296	1859.13	-0.566643	0.251517	-2.2529	0.0242653	0.44396
NM_008738	39.128	-0.566175	0.352868	-1.60449	0.108605	0.571436
NM_027445	395.639	-0.566068	0.265759	-2.13001	0.0331711	0.47243
NM_001289677	56.0922	-0.565596	0.328915	-1.71958	0.0855088	0.558866
NM_024198	39.8444	-0.565466	0.312205	-1.8112	0.07011	0.545503
NM_001101535	41.1055	-0.565398	0.406141	-1.39212	0.163886	0.605298
NM_025983	287.226	-0.565256	0.223893	-2.52467	0.0115805	0.396988
NM_026698	90.4165	-0.564971	0.293977	-1.92182	0.0546283	0.511793
NM_007635	406.38	-0.564925	0.236529	-2.38839	0.0169222	0.418062
NR_027987	22.2504	-0.563837	0.372566	-1.51339	0.130181	NA
NM_013725	1102.92	-0.563591	0.247944	-2.27305	0.0230229	0.442815
NM_001271020	13.0644	-0.563511	0.482637	-1.16757	0.242981	NA
NM_146959	13.0644	-0.563511	0.482637	-1.16757	0.242981	NA
NM_145472	25.8025	-0.563276	0.392262	-1.43597	0.151011	NA
NM_176828	25.8025	-0.563276	0.392262	-1.43597	0.151011	NA
NM_011756	254.138	-0.563254	0.379883	-1.4827	0.138153	0.587396
NM_001002239	1083.37	-0.563223	0.238983	-2.35675	0.0184355	0.434768
NM_145122	79.1502	-0.563192	0.284572	-1.97908	0.0478066	0.497508
NM_001099631	46.1082	-0.563091	0.352807	-1.59603	0.110482	0.571694
NM_001005859	1014.28	-0.563007	0.193678	-2.90693	0.00364993	0.315016
NM_001287581	1014.28	-0.563007	0.193678	-2.90693	0.00364993	0.315016
NM_026724	1014.28	-0.563007	0.193678	-2.90693	0.00364993	0.315016
NR_131118	19.3546	-0.56298	0.459296	-1.22575	0.220294	NA
NM_030262	259.346	-0.562547	0.250727	-2.24366	0.0248543	0.446974
NM_026533	866.763	-0.562198	0.234642	-2.39598	0.0165761	0.417556
NM_010346	182.981	-0.562185	0.256931	-2.18807	0.0286643	0.461944
NM_001033433	25.1067	-0.56208	0.416016	-1.3511	0.176663	NA
NM_001110831	270.394	-0.562042	0.238525	-2.35632	0.0184568	0.434768
NM_008197	283.339	-0.561734	0.464681	-1.20886	0.226716	0.634137
NM_001168253	661.252	-0.561656	0.275002	-2.04237	0.0411145	0.493498
NM_080445	147.143	-0.561639	0.242199	-2.31892	0.0203995	0.440437
NM_153083	87.6842	-0.561604	0.288289	-1.94806	0.0514081	0.506658
NM_001025586	108.165	-0.561576	0.259567	-2.16351	0.0305021	0.462857
NM_001025587	108.165	-0.561576	0.259567	-2.16351	0.0305021	0.462857
NR_104434	108.165	-0.561576	0.259567	-2.16351	0.0305021	0.462857
NM_001145959	55.3016	-0.561523	0.322517	-1.74106	0.0816725	0.556159
NM_013864	55.3016	-0.561523	0.322517	-1.74106	0.0816725	0.556159
NM_001199350	1012.35	-0.561403	0.193634	-2.89931	0.00373987	0.317437
NM_001271614	406.063	-0.561338	0.246747	-2.27495	0.0229089	0.442815
NM_001271615	406.063	-0.561338	0.246747	-2.27495	0.0229089	0.442815
NM_007999	406.063	-0.561338	0.246747	-2.27495	0.0229089	0.442815
NM_172487	90.2275	-0.560711	0.338312	-1.65738	0.0974429	0.567004
NM_009557	96.9552	-0.560673	0.269675	-2.07907	0.0376111	0.487342
NM_010055	27.7614	-0.560593	0.44965	-1.24673	0.212496	NA
NM_001033776	48.9044	-0.560572	0.382461	-1.4657	0.142731	0.590351
NM_001289699	90.4615	-0.560496	0.33872	-1.65475	0.0979755	0.567004
NM_001289700	90.4615	-0.560496	0.33872	-1.65475	0.0979755	0.567004
NM_001100460	22.6373	-0.560409	0.481073	-1.16492	0.244053	NA
NM_173397	102.237	-0.560214	0.250492	-2.23645	0.0253221	0.450006
NM_133819	1466.53	-0.560168	0.209792	-2.67011	0.00758269	0.363501
NM_010860	711.539	-0.559638	0.435864	-1.28398	0.199151	0.623167
NM_001289678	55.4745	-0.559465	0.325509	-1.71874	0.0856619	0.558866
NM_030880	55.4745	-0.559465	0.325509	-1.71874	0.0856619	0.558866
NM_010073	119.051	-0.559194	0.255741	-2.18657	0.0287741	0.461944
NM_001177427	53.697	-0.559027	0.296772	-1.88369	0.0596071	0.52177
NM_013760	312.851	-0.558852	0.271842	-2.0558	0.0398021	0.49079
NM_021519	225.736	-0.558475	0.234924	-2.37726	0.0174417	0.42466
NM_175096	28.9371	-0.558398	0.465807	-1.19877	0.230616	NA
NM_001242580	98.8712	-0.558255	0.270615	-2.06291	0.0391215	0.488417
NM_012049	98.8712	-0.558255	0.270615	-2.06291	0.0391215	0.488417
NM_009433	264.492	-0.558239	0.260618	-2.14198	0.0321951	0.469242
NM_026383	453.73	-0.558006	0.265579	-2.10109	0.0356328	0.483373
NM_177275	32.3204	-0.557888	0.407291	-1.36975	0.170764	NA
NM_001271730	515.076	-0.557157	0.212319	-2.62415	0.00868644	0.367113
NM_013842	515.076	-0.557157	0.212319	-2.62415	0.00868644	0.367113
NM_001099738	22.2315	-0.55613	0.443706	-1.25337	0.210069	NA
NM_138664	22.2315	-0.55613	0.443706	-1.25337	0.210069	NA
NM_001163516	38.4262	-0.55612	0.31437	-1.769	0.0768944	0.551692
NM_030258	66.8002	-0.556045	0.358958	-1.54905	0.121369	0.573435
NM_177603	33.4214	-0.555911	0.410194	-1.35524	0.175341	NA
NM_001205341	17.2076	-0.555774	0.420789	-1.32079	0.186571	NA
NM_177373	17.2076	-0.555774	0.420789	-1.32079	0.186571	NA
NM_008748	317.088	-0.555474	0.362557	-1.5321	0.125498	0.579193
NM_001271358	148.733	-0.555279	0.276321	-2.00954	0.0444798	0.496586
NM_001271359	148.733	-0.555279	0.276321	-2.00954	0.0444798	0.496586
NM_001271360	148.733	-0.555279	0.276321	-2.00954	0.0444798	0.496586
NM_145429	148.733	-0.555279	0.276321	-2.00954	0.0444798	0.496586
NM_021555	96.6147	-0.555214	0.280732	-1.97774	0.0479584	0.497508
NM_010822	206.557	-0.554832	0.272738	-2.0343	0.0419212	0.493498
NM_028715	92.2152	-0.554679	0.314616	-1.76303	0.0778948	0.552163
NR_028267	92.2152	-0.554679	0.314616	-1.76303	0.0778948	0.552163
NR_131256	92.2152	-0.554679	0.314616	-1.76303	0.0778948	0.552163
NM_001290491	271.28	-0.554486	0.224685	-2.46784	0.0135931	0.414265
NM_001290492	271.28	-0.554486	0.224685	-2.46784	0.0135931	0.414265
NM_177370	271.28	-0.554486	0.224685	-2.46784	0.0135931	0.414265
NM_176843	384.728	-0.554316	0.25272	-2.1934	0.0282786	0.461944
NM_001290539	61.4003	-0.554184	0.293011	-1.89134	0.0585788	0.51975
NM_145967	61.4003	-0.554184	0.293011	-1.89134	0.0585788	0.51975
NM_009180	269.605	-0.554049	0.230374	-2.405	0.0161726	0.415565
NM_025400	47.179	-0.554019	0.296472	-1.86871	0.0616638	0.52844
NM_001301373	75.0068	-0.553867	0.361902	-1.53043	0.12591	0.57927
NM_001301375	75.0068	-0.553867	0.361902	-1.53043	0.12591	0.57927
NM_008046	75.0068	-0.553867	0.361902	-1.53043	0.12591	0.57927
NM_020510	158.681	-0.553855	0.377195	-1.46835	0.142009	0.589042
NM_001254735	220.078	-0.55334	0.272065	-2.03385	0.0419663	0.493498
NR_033305	17.1613	-0.553223	0.430849	-1.28403	0.199131	NA
NM_001033170	120.714	-0.553102	0.279033	-1.98221	0.0474556	0.497508
NM_175491	686.993	-0.552714	0.238287	-2.31953	0.0203662	0.440437
NM_001163425	216.406	-0.552603	0.264645	-2.08809	0.0367899	0.484385
NR_028108	216.406	-0.552603	0.264645	-2.08809	0.0367899	0.484385
NM_027937	38.0378	-0.552586	0.418696	-1.31978	0.186909	0.614513
NM_001202500	572.689	-0.552326	0.237027	-2.33022	0.0197946	0.440437
NM_025577	88.3227	-0.552236	0.296145	-1.86475	0.0622165	0.531529
NM_001112701	516.832	-0.552089	0.24925	-2.215	0.0267598	0.455734
NM_011181	516.832	-0.552089	0.24925	-2.215	0.0267598	0.455734
NM_028820	1439.22	-0.551804	0.248232	-2.22294	0.0262202	0.4526
NM_001290508	196.944	-0.551704	0.218953	-2.51974	0.0117443	0.396988
NM_001290509	196.944	-0.551704	0.218953	-2.51974	0.0117443	0.396988
NM_020329	196.944	-0.551704	0.218953	-2.51974	0.0117443	0.396988
NR_110963	196.944	-0.551704	0.218953	-2.51974	0.0117443	0.396988
NM_001170976	26.583	-0.551394	0.436464	-1.26332	0.206474	NA
NM_016878	268.474	-0.551294	0.238905	-2.30759	0.0210219	0.440437
NR_110961	268.111	-0.551112	0.225424	-2.44477	0.0144943	0.415565
NM_019547	1365.79	-0.551101	0.25711	-2.14345	0.0320772	0.468764
NM_020011	221.224	-0.550754	0.271305	-2.03001	0.0423551	0.494158
NM_177354	169.58	-0.550363	0.254273	-2.16445	0.0304295	0.462857
NM_026778	104.421	-0.550286	0.328135	-1.67701	0.0935407	0.565863
NM_019647	1233.23	-0.550006	0.20365	-2.70074	0.00691863	0.352867
NM_134087	666.544	-0.549593	0.2754	-1.99562	0.0459756	0.497508
NM_007553	59.4659	-0.549387	0.370583	-1.48249	0.138209	0.587396
NM_001029933	26.7897	-0.54921	0.369073	-1.48808	0.13673	NA
NM_001252218	1431.54	-0.549106	0.225904	-2.4307	0.0150697	0.415565
NM_001252219	1431.54	-0.549106	0.225904	-2.4307	0.0150697	0.415565
NM_053257	1431.54	-0.549106	0.225904	-2.4307	0.0150697	0.415565
NM_028657	142.047	-0.548784	0.284279	-1.93044	0.0535525	0.511645
NM_013541	43.4026	-0.548568	0.306507	-1.78974	0.0734962	0.551646
NM_009513	218.224	-0.548377	0.21515	-2.54881	0.0108092	0.396067
NM_023731	545.686	-0.548374	0.207963	-2.63688	0.00836736	0.367113
NR_037603	347.362	-0.548228	0.26492	-2.06941	0.0385079	0.487342
NM_001290493	252.505	-0.548109	0.223998	-2.44694	0.0144075	0.415565
NM_178732	137.083	-0.548055	0.288238	-1.9014	0.0572496	0.519492
NM_033398	451.793	-0.548045	0.211145	-2.59559	0.00944291	0.377576
NM_029101	344.31	-0.54804	0.237225	-2.31021	0.0208765	0.440437
NM_029584	20.6644	-0.547983	0.441555	-1.24103	0.214595	NA
NM_001039045	87.8581	-0.547903	0.220604	-2.48365	0.0130042	0.412433
NM_026078	87.8581	-0.547903	0.220604	-2.48365	0.0130042	0.412433
NM_001033431	28.6344	-0.547474	0.365472	-1.49799	0.134136	NA
NM_007939	16.306	-0.547435	0.441734	-1.23929	0.215239	NA
NM_001207021	40.5341	-0.547325	0.31244	-1.75178	0.0798123	0.553613
NM_001161413	2133.35	-0.547294	0.161936	-3.37969	0.000725685	0.154267
NM_001286972	129.209	-0.547171	0.248567	-2.2013	0.0277148	0.461944
NM_026892	63.033	-0.547074	0.328609	-1.66482	0.095949	0.566785
NM_011107	427.629	-0.546829	0.196805	-2.77853	0.00546059	0.346017
NM_133796	730.148	-0.546602	0.249251	-2.19298	0.0283087	0.461944
NM_053208	514.948	-0.546469	0.215979	-2.5302	0.0113997	0.396988
NM_011773	20.2929	-0.546368	0.4193	-1.30305	0.192559	NA
NM_001004177	161.402	-0.546174	0.277884	-1.96548	0.0493591	0.499534
NM_017392	161.402	-0.546174	0.277884	-1.96548	0.0493591	0.499534
NM_025526	161.677	-0.546122	0.22515	-2.42559	0.0152834	0.415565
NM_133744	427.066	-0.545995	0.250857	-2.17652	0.0295166	0.462857
NM_010358	159.661	-0.545746	0.288069	-1.8945	0.0581593	0.519633
NM_009675	32.1734	-0.545738	0.355227	-1.53631	0.124463	NA
NR_045429	13.47	-0.545232	0.428299	-1.27302	0.203011	NA
NM_177632	226.355	-0.545187	0.289187	-1.88524	0.0593977	0.52164
NM_026401	144.004	-0.545024	0.242605	-2.24655	0.0246687	0.446822
NM_134142	179.283	-0.544973	0.211935	-2.57142	0.0101284	0.387102
NM_001302954	1022.43	-0.544568	0.226064	-2.40891	0.0160001	0.415565
NM_001302955	1022.43	-0.544568	0.226064	-2.40891	0.0160001	0.415565
NM_011551	1022.43	-0.544568	0.226064	-2.40891	0.0160001	0.415565
NM_010590	2161.17	-0.544408	0.197055	-2.76272	0.00573226	0.346017
NM_001294258	354.821	-0.544045	0.227012	-2.39654	0.0165506	0.417413
NM_001294259	354.821	-0.544045	0.227012	-2.39654	0.0165506	0.417413
NM_025600	354.821	-0.544045	0.227012	-2.39654	0.0165506	0.417413
NR_122114	354.821	-0.544045	0.227012	-2.39654	0.0165506	0.417413
NR_122115	354.821	-0.544045	0.227012	-2.39654	0.0165506	0.417413
NM_001302459	211.293	-0.544036	0.244866	-2.22177	0.0262989	0.453587
NM_001242934	373.313	-0.543506	0.266191	-2.04178	0.0411729	0.493498
NM_001253795	313.509	-0.543151	0.212381	-2.55744	0.0105445	0.393022
NM_009319	313.509	-0.543151	0.212381	-2.55744	0.0105445	0.393022
NM_153776	20.1735	-0.542415	0.40376	-1.34341	0.179139	NA
NM_177391	22.3508	-0.541894	0.437113	-1.23971	0.215082	NA
NM_019865	425.558	-0.541872	0.243745	-2.22311	0.0262083	0.4526
NR_015492	76.495	-0.541868	0.278586	-1.94506	0.0517672	0.508297
NM_001291124	1050.36	-0.541815	0.173622	-3.12066	0.00180444	0.22495
NM_173396	1050.36	-0.541815	0.173622	-3.12066	0.00180444	0.22495
NM_007481	588.45	-0.541795	0.259025	-2.09167	0.0364678	0.483373
NM_001289663	19.3787	-0.541711	0.483504	-1.12039	0.26255	NA
NM_001289664	19.3787	-0.541711	0.483504	-1.12039	0.26255	NA
NM_001289665	19.3787	-0.541711	0.483504	-1.12039	0.26255	NA
NM_207258	19.3787	-0.541711	0.483504	-1.12039	0.26255	NA
NM_027203	121.512	-0.541272	0.270922	-1.99789	0.0457291	0.497508
NM_001033286	13.9918	-0.541041	0.443927	-1.21876	0.222935	NA
NM_015816	603.01	-0.54017	0.19758	-2.73393	0.00625833	0.349587
NM_134009	406.099	-0.539879	0.223215	-2.41865	0.0155784	0.415565
NM_018771	848.056	-0.539783	0.243975	-2.21245	0.0269357	0.457082
NM_011571	75.4713	-0.539679	0.375037	-1.439	0.15015	0.592858
NM_027381	197.849	-0.539439	0.245996	-2.19288	0.0283158	0.461944
NM_172738	96.8729	-0.539133	0.258113	-2.08874	0.0367309	0.484385
NM_001290283	68.9821	-0.538971	0.278437	-1.9357	0.0529046	0.511118
NM_183139	68.9821	-0.538971	0.278437	-1.9357	0.0529046	0.511118
NM_026494	123.518	-0.538883	0.254908	-2.11403	0.0345128	0.480516
NM_010425	58.1206	-0.53884	0.321312	-1.677	0.0935422	0.565863
NM_175332	383.654	-0.538221	0.344812	-1.56091	0.118544	0.573435
NM_001044383	991.667	-0.538135	0.225336	-2.38814	0.0169337	0.418062
NM_009128	3934.24	-0.538001	0.241096	-2.23148	0.0256493	0.451505
NM_027207	60.2235	-0.537741	0.259565	-2.0717	0.0382934	0.487342
NR_024139	177.831	-0.537405	0.299839	-1.79231	0.0730828	0.550918
NM_001252548	228.302	-0.537101	0.272428	-1.97153	0.0486629	0.497508
NM_001252549	228.302	-0.537101	0.272428	-1.97153	0.0486629	0.497508
NM_001252550	228.302	-0.537101	0.272428	-1.97153	0.0486629	0.497508
NM_144832	228.302	-0.537101	0.272428	-1.97153	0.0486629	0.497508
NM_010071	203.884	-0.53703	0.245979	-2.18323	0.0290189	0.462857
NM_001199247	349.868	-0.536961	0.264169	-2.03264	0.0420891	0.493498
NM_001199248	349.868	-0.536961	0.264169	-2.03264	0.0420891	0.493498
NM_178637	349.868	-0.536961	0.264169	-2.03264	0.0420891	0.493498
NM_197991	254.539	-0.536953	0.204885	-2.62075	0.00877358	0.367113
NM_001290487	210.403	-0.536921	0.259197	-2.07148	0.0383138	0.487342
NM_025504	210.403	-0.536921	0.259197	-2.07148	0.0383138	0.487342
NM_032393	62.9804	-0.536828	0.342793	-1.56604	0.117339	0.573435
NM_026398	111.787	-0.536639	0.266603	-2.01288	0.0441274	0.496586
NM_009427	190.121	-0.536514	0.301278	-1.78079	0.074946	0.551646
NM_001205157	104.934	-0.536227	0.237656	-2.25631	0.0240509	0.442815
NM_001205158	104.934	-0.536227	0.237656	-2.25631	0.0240509	0.442815
NM_138303	104.934	-0.536227	0.237656	-2.25631	0.0240509	0.442815
NR_038062	104.934	-0.536227	0.237656	-2.25631	0.0240509	0.442815
NM_009223	264.882	-0.536223	0.245292	-2.18606	0.0288112	0.461944
NM_001271607	313.854	-0.536127	0.232216	-2.30874	0.0209578	0.440437
NM_007722	313.854	-0.536127	0.232216	-2.30874	0.0209578	0.440437
NM_178421	78.5795	-0.535849	0.31103	-1.72282	0.0849207	0.558866
NM_029482	82.4103	-0.535813	0.276634	-1.9369	0.0527575	0.511118
NM_027419	36.7666	-0.535748	0.337298	-1.58835	0.112208	0.573
NM_173015	141.425	-0.535677	0.244406	-2.19175	0.0283972	0.461944
NM_001083925	26.9077	-0.535375	0.459796	-1.16437	0.244273	NA
NR_003507	26.9077	-0.535375	0.459796	-1.16437	0.244273	NA
NM_001267591	274.568	-0.534811	0.260893	-2.04992	0.040372	0.493346
NM_001159289	387.661	-0.534788	0.265273	-2.01599	0.0438007	0.496586
NM_016707	387.661	-0.534788	0.265273	-2.01599	0.0438007	0.496586
NM_198011	31.5043	-0.534492	0.33849	-1.57905	0.114325	NA
NM_001281830	4.01536	-0.534306	0.572761	-0.93286	0.350892	NA
NM_199011	334.733	-0.534231	0.250671	-2.1312	0.0330726	0.472187
NM_198305	109.979	-0.533975	0.244907	-2.18032	0.0292338	0.462857
NM_145700	25.8148	-0.533765	0.413063	-1.29221	0.196284	NA
NM_201226	557.018	-0.53361	0.20668	-2.58181	0.00982826	0.382666
NR_037666	37.9127	-0.532975	0.322846	-1.65086	0.0987665	0.567201
NM_175116	526.696	-0.53297	0.253497	-2.10247	0.0355121	0.483373
NM_001048143	142.173	-0.532789	0.24641	-2.1622	0.0306027	0.462857
NM_001164600	1506.79	-0.532679	0.220371	-2.41719	0.0156408	0.415565
NM_028364	1506.94	-0.532665	0.22044	-2.41637	0.0156761	0.415565
NM_133691	1506.94	-0.532665	0.22044	-2.41637	0.0156761	0.415565
NM_001044718	257.845	-0.532542	0.301971	-1.76355	0.0778073	0.552163
NM_011759	257.845	-0.532542	0.301971	-1.76355	0.0778073	0.552163
NM_001302333	33.0706	-0.53253	0.347286	-1.5334	0.125176	NA
NM_009920	33.0706	-0.53253	0.347286	-1.5334	0.125176	NA
NM_031249	435.747	-0.532347	0.256085	-2.07879	0.0376363	0.487342
NM_001310766	22.5706	-0.532193	0.410073	-1.2978	0.194356	NA
NM_001163565	7.36055	-0.531935	0.527939	-1.00757	0.313661	NA
NM_013643	7.36055	-0.531935	0.527939	-1.00757	0.313661	NA
NM_011353	32.0447	-0.53162	0.332319	-1.59973	0.10966	NA
NM_026238	149.764	-0.531238	0.268948	-1.97524	0.0482405	0.497508
NM_011300	2083.9	-0.530851	0.199863	-2.65608	0.00790553	0.365732
NM_001039515	293.298	-0.530371	0.309616	-1.713	0.0867132	0.559349
NM_133879	219.04	-0.530371	0.237906	-2.22932	0.0257923	0.451505
NM_007487	291.628	-0.53015	0.30903	-1.71553	0.0862489	0.558866
NM_010831	535.664	-0.530141	0.229574	-2.30923	0.0209306	0.440437
NM_145521	34.6669	-0.529935	0.404668	-1.30956	0.190346	NA
NM_011315	28.6681	-0.529755	0.357595	-1.48144	0.13849	NA
NM_009423	705.65	-0.528807	0.245446	-2.15447	0.0312032	0.465132
NM_029802	287.806	-0.528737	0.208725	-2.53318	0.0113034	0.396988
NM_001177901	154.13	-0.528434	0.285956	-1.84796	0.0646087	0.537541
NM_001286973	131.266	-0.528277	0.24564	-2.15061	0.0315069	0.465995
NM_026332	131.266	-0.528277	0.24564	-2.15061	0.0315069	0.465995
NM_146116	876.518	-0.528012	0.291243	-1.81296	0.0698379	0.545243
NM_001145900	55.8003	-0.527997	0.324674	-1.62624	0.103899	0.569526
NM_201646	55.8003	-0.527997	0.324674	-1.62624	0.103899	0.569526
NM_029956	173.262	-0.527982	0.263857	-2.00102	0.0453903	0.497333
NM_008776	93.3627	-0.527884	0.288176	-1.83181	0.0669794	0.544034
NM_133783	90.5336	-0.527448	0.291629	-1.80862	0.0705095	0.546086
NM_008055	49.0687	-0.527213	0.341458	-1.54401	0.122587	0.573935
NM_008691	55.0621	-0.52718	0.38025	-1.3864	0.165624	0.605298
NM_009084	800.444	-0.526413	0.198586	-2.65081	0.00802998	0.365732
NM_019674	796.385	-0.526399	0.211918	-2.48398	0.0129924	0.412433
NM_001085407	320.13	-0.525861	0.235868	-2.22948	0.0257823	0.451505
NM_001085408	320.13	-0.525861	0.235868	-2.22948	0.0257823	0.451505
NM_026563	320.13	-0.525861	0.235868	-2.22948	0.0257823	0.451505
NM_001282095	151.984	-0.525394	0.302787	-1.7352	0.0827061	0.557848
NM_013769	151.904	-0.525368	0.302898	-1.73447	0.0828347	0.557848
NM_019935	23.2969	-0.52502	0.38339	-1.36942	0.170869	NA
NM_001081327	12.9305	-0.525001	0.443091	-1.18486	0.236072	NA
NM_010239	456.575	-0.524875	0.250776	-2.09301	0.0363485	0.483373
NM_008340	10.7005	-0.524661	0.492853	-1.06454	0.287085	NA
NM_001033633	267.356	-0.524589	0.196976	-2.66321	0.00773995	0.365732
NM_010192	283.536	-0.524522	0.233636	-2.24504	0.0247657	0.446974
NR_038162	41.3648	-0.52412	0.308367	-1.69966	0.0891943	0.559823
NR_073181	457.321	-0.524084	0.250538	-2.09184	0.0364532	0.483373
NM_011655	3252.33	-0.523637	0.269227	-1.94496	0.0517795	0.508297
NM_001290810	307.023	-0.52339	0.245449	-2.13237	0.032976	0.471448
NM_023536	307.023	-0.52339	0.245449	-2.13237	0.032976	0.471448
NM_019417	64.4402	-0.523289	0.375241	-1.39454	0.163154	0.604372
NM_175121	4290.37	-0.523057	0.180881	-2.89172	0.00383143	0.319291
NM_011905	38.9402	-0.523	0.364552	-1.43464	0.15139	0.593845
NM_145610	597.848	-0.522916	0.246205	-2.12391	0.0336779	0.475204
NM_146090	265.278	-0.522773	0.211273	-2.4744	0.0133461	0.414265
NM_028782	791.143	-0.522735	0.202664	-2.57931	0.00989967	0.383193
NR_045302	14.8149	-0.522467	0.433531	-1.20514	0.228148	NA
NR_045303	14.8149	-0.522467	0.433531	-1.20514	0.228148	NA
NM_025661	112.607	-0.522077	0.249459	-2.09284	0.0363636	0.483373
NM_008479	19.1171	-0.52205	0.390944	-1.33536	0.181759	NA
NM_001305676	324.574	-0.521993	0.196871	-2.65144	0.00801482	0.365732
NM_001305677	324.574	-0.521993	0.196871	-2.65144	0.00801482	0.365732
NM_001305678	324.574	-0.521993	0.196871	-2.65144	0.00801482	0.365732
NM_172399	23.0567	-0.521724	0.378106	-1.37984	0.167637	NA
NM_172749	936.054	-0.521717	0.250397	-2.08356	0.0372002	0.485025
NM_016905	265.495	-0.521357	0.282813	-1.84347	0.0652602	0.539008
NM_025521	67.8248	-0.520466	0.290657	-1.79065	0.0733494	0.551646
NM_011613	98.4932	-0.520213	0.346954	-1.49937	0.133777	0.583411
NM_001142950	1879.41	-0.519819	0.191452	-2.71514	0.00662478	0.352867
NM_027350	1879.41	-0.519819	0.191452	-2.71514	0.00662478	0.352867
NM_009406	22.5296	-0.51951	0.394629	-1.31645	0.188023	NA
NM_019953	294.8	-0.519332	0.221878	-2.34062	0.0192518	0.436878
NM_010318	558.439	-0.519156	0.16008	-3.24311	0.00118234	0.200488
NM_001199940	36.7693	-0.519001	0.404722	-1.28236	0.199715	0.623209
NM_001168615	13.5817	-0.518963	0.494126	-1.05026	0.293597	NA
NM_145976	13.5817	-0.518963	0.494126	-1.05026	0.293597	NA
NM_080289	168.955	-0.518707	0.236277	-2.19533	0.0281397	0.461944
NM_001204152	28.662	-0.518517	0.394777	-1.31344	0.189034	NA
NM_001204153	28.662	-0.518517	0.394777	-1.31344	0.189034	NA
NM_028331	28.662	-0.518517	0.394777	-1.31344	0.189034	NA
NM_175277	159.934	-0.518328	0.193079	-2.68453	0.0072631	0.361096
NM_011045	1279.87	-0.517687	0.23668	-2.18729	0.0287217	0.461944
NR_040707	71.1734	-0.517461	0.31548	-1.64023	0.100957	0.568792
NM_001166031	337.296	-0.517313	0.257297	-2.01056	0.0443716	0.496586
NM_080452	337.296	-0.517313	0.257297	-2.01056	0.0443716	0.496586
NM_027227	42.5713	-0.516967	0.283553	-1.82318	0.0682765	0.544034
NM_001162903	87.4814	-0.516911	0.31583	-1.63668	0.101698	0.568792
NM_001254730	20.3506	-0.516235	0.389559	-1.32518	0.185112	NA
NM_133804	272.207	-0.516205	0.271955	-1.89813	0.0576794	0.519633
NM_175311	154.857	-0.516159	0.28509	-1.81051	0.0702164	0.545681
NM_009891	13.0958	-0.515754	0.453827	-1.13645	0.255767	NA
NM_001159290	381.695	-0.515701	0.266237	-1.937	0.0527455	0.511118
NM_016966	1152.55	-0.515464	0.148638	-3.46792	0.000524498	0.126959
NR_027985	132.419	-0.515133	0.249367	-2.06577	0.0388506	0.487421
NM_001191051	70.8617	-0.5149	0.297711	-1.72953	0.0837147	0.557848
NM_175215	70.8617	-0.5149	0.297711	-1.72953	0.0837147	0.557848
NM_194335	26.7137	-0.51487	0.381563	-1.34937	0.177218	NA
NM_001013749	21.9478	-0.514769	0.460031	-1.11899	0.263145	NA
NM_001160359	68.2421	-0.514288	0.310801	-1.65472	0.0979816	0.567004
NM_001160360	68.2421	-0.514288	0.310801	-1.65472	0.0979816	0.567004
NM_181048	68.2421	-0.514288	0.310801	-1.65472	0.0979816	0.567004
NR_104353	377.144	-0.514204	0.16787	-3.06312	0.00219045	0.234156
NR_027923	30.8818	-0.513935	0.336725	-1.52627	0.126942	NA
NM_001097621	144.251	-0.513901	0.319841	-1.60674	0.108111	0.571322
NM_026738	62.9309	-0.513889	0.314121	-1.63596	0.101848	0.568792
NM_009871	54.0527	-0.513731	0.299631	-1.71454	0.086429	0.558866
NM_178740	34.3086	-0.513657	0.345751	-1.48563	0.137378	NA
NM_023065	97.4252	-0.513213	0.280627	-1.82881	0.0674282	0.544034
NM_172939	161.436	-0.513065	0.305052	-1.6819	0.092589	0.565863
NM_001270489	8.11675	-0.512833	0.505503	-1.0145	0.310344	NA
NM_080461	55.8767	-0.512686	0.335204	-1.52947	0.126147	0.57927
NM_001100606	262.467	-0.512532	0.201419	-2.5446	0.0109403	0.396067
NM_001083880	188.396	-0.511939	0.261826	-1.95526	0.0505524	0.503941
NM_001083881	188.396	-0.511939	0.261826	-1.95526	0.0505524	0.503941
NM_001083882	188.396	-0.511939	0.261826	-1.95526	0.0505524	0.503941
NM_026451	188.396	-0.511939	0.261826	-1.95526	0.0505524	0.503941
NM_001256104	41.5227	-0.511558	0.321126	-1.59301	0.111157	0.571694
NM_145406	41.5227	-0.511558	0.321126	-1.59301	0.111157	0.571694
NM_010699	1378.41	-0.510832	0.215216	-2.37358	0.0176168	0.424961
NR_102727	1378.41	-0.510832	0.215216	-2.37358	0.0176168	0.424961
NM_008331	3.28906	-0.510811	0.550735	-0.927508	0.353663	NA
NM_028347	50.0127	-0.510589	0.268366	-1.90258	0.0570948	0.518705
NM_009976	393.252	-0.510547	0.244193	-2.09075	0.0365504	0.483373
NM_018777	365.595	-0.510464	0.337893	-1.51073	0.130858	0.582292
NM_023133	2312.7	-0.510329	0.244405	-2.08805	0.0367934	0.484385
NM_028763	614.993	-0.510084	0.217788	-2.34211	0.0191749	0.436545
NM_001204973	3000.71	-0.509896	0.230204	-2.21498	0.0267617	0.455734
NM_001163175	92.5715	-0.509669	0.253632	-2.00948	0.0444859	0.496586
NR_045266	108.532	-0.509567	0.215514	-2.36443	0.018058	0.432633
NM_001146687	672.051	-0.50953	0.223757	-2.27716	0.0227767	0.442815
NM_001293646	672.051	-0.50953	0.223757	-2.27716	0.0227767	0.442815
NM_001293647	672.051	-0.50953	0.223757	-2.27716	0.0227767	0.442815
NM_008844	672.051	-0.50953	0.223757	-2.27716	0.0227767	0.442815
NM_001285422	41.249	-0.509402	0.357199	-1.4261	0.15384	0.595982
NM_001164320	24.7784	-0.509227	0.398565	-1.27765	0.201373	NA
NR_015585	129.147	-0.50894	0.235834	-2.15804	0.0309245	0.462857
NM_009480	317.188	-0.508782	0.196064	-2.59498	0.00945956	0.377576
NM_030188	25.4274	-0.508757	0.429876	-1.1835	0.236613	NA
NM_001001160	49.9028	-0.508542	0.348818	-1.4579	0.144868	0.590764
NM_001289674	49.9028	-0.508542	0.348818	-1.4579	0.144868	0.590764
NM_001289675	49.9028	-0.508542	0.348818	-1.4579	0.144868	0.590764
NR_028425	5347.06	-0.508211	0.253045	-2.00838	0.0446025	0.496586
NM_010238	2982	-0.507848	0.230247	-2.20567	0.0274073	0.461736
NM_133900	426.721	-0.50783	0.138475	-3.66729	0.00024513	0.08611
NM_175436	157.191	-0.50771	0.263065	-1.92998	0.0536096	0.511645
NM_001305616	23.869	-0.507671	0.393999	-1.28851	0.197569	NA
NM_007587	23.869	-0.507671	0.393999	-1.28851	0.197569	NA
NM_021789	216.949	-0.50755	0.233918	-2.16978	0.0300235	0.462857
NM_001173506	52.2334	-0.50718	0.368788	-1.37526	0.16905	0.605298
NM_001199556	13.1956	-0.506765	0.479186	-1.05755	0.290259	NA
NM_178737	13.1956	-0.506765	0.479186	-1.05755	0.290259	NA
NM_020507	279.037	-0.506241	0.259678	-1.9495	0.0512362	0.505822
NR_033619	21.0543	-0.505641	0.369375	-1.36891	0.171028	NA
NM_009415	393.894	-0.505494	0.250778	-2.01571	0.0438308	0.496586
NM_001130515	58.8188	-0.505483	0.262901	-1.92271	0.0545163	0.511703
NM_001130516	58.8188	-0.505483	0.262901	-1.92271	0.0545163	0.511703
NM_027658	58.8188	-0.505483	0.262901	-1.92271	0.0545163	0.511703
NM_183427	27.2206	-0.505348	0.402118	-1.25672	0.208856	NA
NM_025652	301.707	-0.505018	0.201479	-2.50655	0.0121915	0.399907
NM_009095	3227.56	-0.504992	0.232108	-2.17568	0.0295793	0.462857
NM_007907	4912.78	-0.504901	0.279168	-1.80859	0.0705141	0.546086
NM_010291	39.1107	-0.504261	0.426531	-1.18224	0.237111	0.639696
NM_001276321	650.389	-0.50418	0.217768	-2.31522	0.0206009	0.440437
NM_008889	157.173	-0.504134	0.285142	-1.76801	0.0770584	0.551692
NM_001172561	299.973	-0.504088	0.256533	-1.965	0.0494142	0.499575
NM_203280	299.973	-0.504088	0.256533	-1.965	0.0494142	0.499575
NM_001159483	1019.94	-0.504015	0.23802	-2.11753	0.0342147	0.477487
NM_029649	112.153	-0.503796	0.280523	-1.79592	0.0725078	0.548647
NM_001105561	37.0119	-0.503499	0.498163	-1.01071	0.312155	0.676471
NM_175399	111.62	-0.503247	0.281431	-1.78817	0.0737484	0.551646
NM_009078	1019.51	-0.503217	0.238299	-2.11171	0.0347117	0.481723
NM_145608	21.2688	-0.503138	0.395326	-1.27272	0.203119	NA
NM_009846	390.752	-0.503129	0.245484	-2.04954	0.0404091	0.493346
NM_080837	217.38	-0.502896	0.194995	-2.57902	0.00990801	0.383193
NM_001038612	60.8069	-0.502666	0.361393	-1.39091	0.164252	0.605298
NM_001136069	1292.75	-0.50265	0.214342	-2.34509	0.0190227	0.435049
NM_024250	772.769	-0.502389	0.187987	-2.67247	0.00752954	0.363501
NM_198617	42.8017	-0.502271	0.341157	-1.47226	0.140951	0.588929
NM_030252	114.373	-0.502263	0.275885	-1.82055	0.0686749	0.544034
NM_025450	201.106	-0.502125	0.205972	-2.43783	0.0147758	0.415565
NM_001008700	77.0993	-0.501809	0.404371	-1.24096	0.21462	0.628337
NM_027376	74.1855	-0.501524	0.287691	-1.74327	0.0812858	0.556159
NM_001243307	96.894	-0.501432	0.262454	-1.91055	0.056062	0.516904
NM_198616	96.894	-0.501432	0.262454	-1.91055	0.056062	0.516904
NM_028009	63.2638	-0.50099	0.305399	-1.64045	0.100912	0.568792
NM_001305420	133.26	-0.500799	0.280259	-1.78692	0.0739509	0.551646
NR_037970	2862.31	-0.500703	0.230388	-2.1733	0.0297575	0.462857
NM_139307	123.328	-0.500486	0.303842	-1.64719	0.0995184	0.568418
NM_018763	38.3943	-0.500243	0.354784	-1.40999	0.158542	0.600828
NM_011068	43.0737	-0.499752	0.31129	-1.60542	0.108402	0.571436
NM_029767	2973.97	-0.499677	0.234588	-2.13002	0.0331702	0.47243
NM_145151	1200.01	-0.49949	0.179897	-2.77653	0.00549428	0.346017
NR_073436	1200.01	-0.49949	0.179897	-2.77653	0.00549428	0.346017
NR_073437	1200.01	-0.49949	0.179897	-2.77653	0.00549428	0.346017
NR_073438	1200.01	-0.49949	0.179897	-2.77653	0.00549428	0.346017
NM_026965	99.7397	-0.499353	0.255624	-1.95346	0.0507648	0.503941
NM_001163434	1990.75	-0.498872	0.244587	-2.03965	0.0413854	0.493498
NM_022310	1990.75	-0.498872	0.244587	-2.03965	0.0413854	0.493498
NM_198035	413.336	-0.498747	0.246152	-2.02618	0.0427464	0.49543
NM_026631	877.328	-0.498503	0.224154	-2.22393	0.026153	0.4526
NM_001085440	1539.3	-0.498383	0.206864	-2.40923	0.0159861	0.415565
NM_024193	1926.94	-0.498178	0.230768	-2.15878	0.030867	0.462857
NM_026246	265.748	-0.498159	0.250085	-1.99196	0.0463756	0.497508
NM_001159618	196.893	-0.498065	0.272933	-1.82486	0.0680219	0.544034
NM_001159619	195.693	-0.497962	0.273029	-1.82384	0.0681758	0.544034
NM_013779	42.358	-0.497525	0.357022	-1.39354	0.163456	0.605065
NM_011358	2355.26	-0.497238	0.228747	-2.17375	0.0297241	0.462857
NM_025962	128.462	-0.497177	0.260288	-1.9101	0.0561203	0.51699
NM_026542	336.283	-0.497136	0.257483	-1.93075	0.0535138	0.511645
NM_198250	9.92479	-0.497077	0.523771	-0.949035	0.342603	NA
NM_001163015	63.5386	-0.496522	0.280961	-1.76723	0.0771899	0.551692
NM_001163016	63.5386	-0.496522	0.280961	-1.76723	0.0771899	0.551692
NM_001163017	63.5386	-0.496522	0.280961	-1.76723	0.0771899	0.551692
NM_177741	53.6443	-0.496448	0.364553	-1.3618	0.173261	0.607388
NM_021502	97.6988	-0.496431	0.249499	-1.98972	0.0466223	0.497508
NM_008090	58.0742	-0.496136	0.320442	-1.54828	0.121554	0.573435
NM_001159375	3349.9	-0.496105	0.231008	-2.14757	0.0317479	0.466559
NM_144958	3349.9	-0.496105	0.231008	-2.14757	0.0317479	0.466559
NM_028317	40.1034	-0.496063	0.447715	-1.10799	0.267867	0.656007
NM_025556	195.604	-0.496032	0.214127	-2.31653	0.0205292	0.440437
NM_026055	928.946	-0.495715	0.20229	-2.45052	0.0142649	0.415565
NM_009378	14.5285	-0.495624	0.481335	-1.02969	0.303157	NA
NM_001163478	3127.79	-0.49557	0.241495	-2.05209	0.0401605	0.4929
NR_028094	3127.79	-0.49557	0.241495	-2.05209	0.0401605	0.4929
NM_178619	203.22	-0.495535	0.259198	-1.9118	0.0559022	0.516335
NM_033075	256.084	-0.495358	0.252979	-1.9581	0.0502188	0.502642
NM_001110201	285.351	-0.495351	0.220409	-2.24741	0.0246136	0.446459
NM_029887	285.351	-0.495351	0.220409	-2.24741	0.0246136	0.446459
NM_001159616	197.355	-0.494763	0.271714	-1.8209	0.0686223	0.544034
NM_027828	17.4382	-0.494755	0.394317	-1.25471	0.209583	NA
NM_001286217	37.9263	-0.494663	0.333862	-1.48164	0.138436	0.587396
NM_001286218	37.9263	-0.494663	0.333862	-1.48164	0.138436	0.587396
NM_026928	37.9263	-0.494663	0.333862	-1.48164	0.138436	0.587396
NR_104415	37.9263	-0.494663	0.333862	-1.48164	0.138436	0.587396
NM_172142	45.2595	-0.494582	0.340991	-1.45042	0.146941	0.591781
NM_001045482	215.392	-0.4945	0.180511	-2.73945	0.00615429	0.348571
NM_021326	215.392	-0.4945	0.180511	-2.73945	0.00615429	0.348571
NM_009734	333.339	-0.49447	0.316341	-1.5631	0.11803	0.573435
NM_008906	322.891	-0.494053	0.225103	-2.19478	0.0281793	0.461944
NM_178915	19.2863	-0.494046	0.429759	-1.14959	0.250314	NA
NM_016690	2496.45	-0.493984	0.201	-2.45764	0.0139855	0.415565
NM_001159617	197.622	-0.493695	0.272367	-1.81261	0.0698928	0.545243
NM_019543	197.622	-0.493695	0.272367	-1.81261	0.0698928	0.545243
NR_015463	2250.65	-0.493263	0.218737	-2.25505	0.02413	0.442815
NR_027887	2250.65	-0.493263	0.218737	-2.25505	0.02413	0.442815
NM_207223	77.5563	-0.493114	0.253164	-1.94781	0.0514381	0.506658
NM_001081260	688.61	-0.493087	0.225316	-2.18842	0.0286387	0.461944
NM_001282096	136.747	-0.49308	0.313324	-1.5737	0.115556	0.573435
NM_020259	487.724	-0.493063	0.44802	-1.10054	0.271098	0.658028
NM_019968	131.513	-0.492765	0.268472	-1.83544	0.0664399	0.544034
NM_001303476	221.371	-0.492475	0.202277	-2.43466	0.0149059	0.415565
NM_009975	221.371	-0.492475	0.202277	-2.43466	0.0149059	0.415565
NM_172086	1897.01	-0.492159	0.245115	-2.00787	0.0446575	0.496586
NM_145421	273.872	-0.492056	0.211736	-2.32391	0.0201301	0.440437
NM_013678	201.38	-0.491938	0.277633	-1.7719	0.0764115	0.551646
NM_009342	385.691	-0.491802	0.186096	-2.64274	0.00822379	0.366687
NM_001164156	426.074	-0.491749	0.231372	-2.12536	0.0335565	0.475204
NM_016766	426.074	-0.491749	0.231372	-2.12536	0.0335565	0.475204
NR_033503	37.8449	-0.491688	0.42145	-1.16666	0.243349	0.643415
NM_172442	407.592	-0.491538	0.189645	-2.59188	0.00954517	0.378553
NM_001303445	221.644	-0.491489	0.202003	-2.43308	0.0149712	0.415565
NM_001031664	40.3785	-0.491255	0.307817	-1.59594	0.110503	0.571694
NM_001290469	57.883	-0.490789	0.363459	-1.35033	0.17691	0.61021
NM_019488	125.394	-0.490769	0.299127	-1.64067	0.100866	0.568792
NM_001272097	123.518	-0.490755	0.347575	-1.41194	0.157967	0.600609
NM_001272098	123.518	-0.490755	0.347575	-1.41194	0.157967	0.600609
NM_010634	123.518	-0.490755	0.347575	-1.41194	0.157967	0.600609
NM_175687	92.3386	-0.490668	0.266643	-1.84017	0.0657432	0.540815
NM_001024606	157.855	-0.490337	0.295821	-1.65755	0.097409	0.567004
NM_133930	169.949	-0.490122	0.206886	-2.36904	0.0178344	0.428913
NM_001286039	52.894	-0.489931	0.364382	-1.34455	0.17877	0.612117
NM_001303446	222.78	-0.489577	0.202415	-2.41868	0.0155768	0.415565
NM_021437	315.591	-0.489331	0.243188	-2.01215	0.0442041	0.496586
NM_199199	539.659	-0.48917	0.186577	-2.62182	0.00874627	0.367113
NM_019396	742.942	-0.489146	0.208466	-2.34641	0.0189555	0.435049
NM_010885	146.543	-0.489136	0.269602	-1.81429	0.0696333	0.545243
NM_173751	181.169	-0.489029	0.220229	-2.22054	0.0263818	0.453753
NM_001033380	94.5322	-0.488834	0.341497	-1.43145	0.152302	0.594389
NM_001083903	45.6869	-0.488716	0.303916	-1.60807	0.107821	0.570913
NM_172205	45.6869	-0.488716	0.303916	-1.60807	0.107821	0.570913
NM_011231	2862.68	-0.488252	0.239631	-2.03751	0.0415985	0.493498
NR_028095	2862.68	-0.488252	0.239631	-2.03751	0.0415985	0.493498
NR_028096	2862.68	-0.488252	0.239631	-2.03751	0.0415985	0.493498
NM_024177	313.208	-0.488246	0.241229	-2.02399	0.0429707	0.495962
NM_008894	149.431	-0.488235	0.251592	-1.94058	0.0523092	0.509905
NM_001110328	573.552	-0.488134	0.211497	-2.30799	0.0209997	0.440437
NM_001110329	573.552	-0.488134	0.211497	-2.30799	0.0209997	0.440437
NM_033074	949.81	-0.487759	0.180398	-2.70379	0.00685533	0.352867
NM_001111275	240.619	-0.487587	0.386693	-1.26091	0.20734	0.626302
NM_010512	240.619	-0.487587	0.386693	-1.26091	0.20734	0.626302
NM_009208	150.366	-0.487559	0.286768	-1.70019	0.0890955	0.559823
NM_027985	88.7792	-0.487446	0.294339	-1.65607	0.0977082	0.567004
NM_001042655	314.604	-0.487338	0.210525	-2.31487	0.0206203	0.440437
NM_001111274	232.271	-0.48711	0.388091	-1.25514	0.209427	0.626647
NM_001111276	232.271	-0.48711	0.388091	-1.25514	0.209427	0.626647
NM_016674	35.5426	-0.486601	0.350189	-1.38954	0.164669	NA
NM_012021	124.217	-0.486429	0.241279	-2.01604	0.0437958	0.496586
NR_029475	68.3555	-0.486171	0.37832	-1.28508	0.198765	0.622959
NM_010058	339.551	-0.486157	0.248465	-1.95664	0.0503895	0.503941
NM_001039386	64.9461	-0.485968	0.332795	-1.46026	0.144218	0.590559
NM_001039387	64.9461	-0.485968	0.332795	-1.46026	0.144218	0.590559
NM_001177654	64.9461	-0.485968	0.332795	-1.46026	0.144218	0.590559
NM_001177655	64.9461	-0.485968	0.332795	-1.46026	0.144218	0.590559
NM_020276	64.9461	-0.485968	0.332795	-1.46026	0.144218	0.590559
NR_040617	51.7953	-0.485798	0.326918	-1.48599	0.137281	0.586768
NM_001077363	2721.87	-0.485702	0.216839	-2.23992	0.0250962	0.448229
NM_001283013	2721.87	-0.485702	0.216839	-2.23992	0.0250962	0.448229
NM_008956	2721.87	-0.485702	0.216839	-2.23992	0.0250962	0.448229
NM_031201	251.894	-0.485495	0.200337	-2.4234	0.0153762	0.415565
NM_024257	9.69381	-0.485336	0.489455	-0.991584	0.3214	NA
NM_011813	562.599	-0.485307	0.21164	-2.29308	0.0218434	0.441926
NM_007531	704.713	-0.485255	0.242612	-2.00013	0.0454861	0.497508
NM_010461	14.4516	-0.485224	0.56168	-0.863881	0.387653	NA
NM_001168657	488.744	-0.485177	0.272026	-1.78357	0.0744932	0.551646
NM_001081415	112.19	-0.485078	0.303156	-1.6001	0.109577	0.571436
NM_172148	35.2411	-0.484879	0.362954	-1.33592	0.181574	NA
NM_007631	574.263	-0.484791	0.226353	-2.14175	0.0322135	0.469242
NM_183137	174.422	-0.484759	0.22807	-2.12549	0.033546	0.475204
NM_011421	47.1399	-0.484423	0.3462	-1.39926	0.161736	0.603259
NM_018858	270.303	-0.484249	0.213543	-2.26769	0.0233483	0.442815
NM_025701	196.12	-0.484154	0.226393	-2.13856	0.0324713	0.470946
NR_045268	127.578	-0.484107	0.225272	-2.14899	0.0316355	0.466381
NM_023217	466.082	-0.484056	0.261227	-1.85301	0.0638809	0.536507
NM_025555	268.037	-0.483509	0.194868	-2.48121	0.0130938	0.412741
NR_030677	50.8393	-0.483481	0.28783	-1.67975	0.0930066	0.565863
NM_145066	32.48	-0.483432	0.406746	-1.18853	0.234623	NA
NM_177684	86.4309	-0.483302	0.25558	-1.891	0.0586239	0.51975
NM_001301649	108.842	-0.483054	0.271324	-1.78036	0.0750171	0.551646
NM_007517	108.842	-0.483054	0.271324	-1.78036	0.0750171	0.551646
NR_125891	108.842	-0.483054	0.271324	-1.78036	0.0750171	0.551646
NM_053194	248.353	-0.482817	0.203852	-2.36847	0.017862	0.428913
NM_008562	4850	-0.48275	0.172494	-2.79865	0.00513167	0.346017
NM_001033474	459.292	-0.482642	0.252557	-1.91102	0.0560015	0.516904
NM_019746	240.692	-0.482592	0.211029	-2.28685	0.0222047	0.441975
NM_001038492	328.794	-0.482519	0.224606	-2.14829	0.0316907	0.466381
NM_001077184	1031.49	-0.482351	0.213912	-2.2549	0.0241394	0.442815
NM_009768	1031.49	-0.482351	0.213912	-2.2549	0.0241394	0.442815
NM_001110330	534.026	-0.482291	0.217742	-2.21496	0.0267629	0.455734
NM_009201	1129.67	-0.482206	0.178966	-2.6944	0.00705159	0.354414
NM_027697	84.4234	-0.481932	0.28167	-1.71098	0.0870841	0.559823
NM_025994	121.001	-0.481876	0.268747	-1.79305	0.072965	0.550545
NM_001281812	31.49	-0.48183	0.393678	-1.22392	0.220983	NA
NM_001291104	24.1223	-0.481704	0.37885	-1.27149	0.203555	NA
NM_010198	24.1223	-0.481704	0.37885	-1.27149	0.203555	NA
NM_009869	37.0868	-0.48156	0.272001	-1.77043	0.0766551	0.551692
NM_021350	188.497	-0.481394	0.261076	-1.84388	0.0652002	0.538935
NM_001029890	580.867	-0.481283	0.224879	-2.14019	0.0323395	0.47033
NM_007706	534.544	-0.481283	0.268904	-1.78979	0.0734873	0.551646
NM_011653	870.251	-0.481078	0.271978	-1.76881	0.0769254	0.551692
NM_013750	546.555	-0.481063	0.305368	-1.57536	0.115174	0.573435
NM_001294269	129.863	-0.480852	0.308405	-1.55916	0.118959	0.573435
NM_025396	129.863	-0.480852	0.308405	-1.55916	0.118959	0.573435
NR_033482	15.927	-0.480776	0.484681	-0.991942	0.321226	NA
NM_027279	62.9253	-0.480362	0.270115	-1.77836	0.075344	0.551646
NM_019698	1488.55	-0.480325	0.158335	-3.03361	0.00241648	0.249455
NM_153554	1488.55	-0.480325	0.158335	-3.03361	0.00241648	0.249455
NM_025848	611.703	-0.480325	0.190201	-2.52535	0.0115582	0.396988
NM_001033954	41.6901	-0.480068	0.35388	-1.35658	0.174914	0.609144
NM_001289444	41.6901	-0.480068	0.35388	-1.35658	0.174914	0.609144
NM_031248	122.952	-0.480048	0.236011	-2.034	0.0419512	0.493498
NM_009447	159.945	-0.47906	0.282039	-1.69856	0.0894026	0.560441
NM_001033537	104.988	-0.479033	0.29453	-1.62643	0.103858	0.569526
NM_029092	443.629	-0.478848	0.233433	-2.05133	0.0402353	0.4929
NM_024440	35.5832	-0.478809	0.301842	-1.58629	0.112673	NA
NM_001161850	1510.82	-0.478803	0.230137	-2.08051	0.0374787	0.487342
NM_010301	462.015	-0.478638	0.211147	-2.26684	0.0233999	0.442815
NM_001301854	1188.09	-0.478601	0.18538	-2.58173	0.00983058	0.382666
NM_011492	1188.09	-0.478601	0.18538	-2.58173	0.00983058	0.382666
NR_126043	1188.09	-0.478601	0.18538	-2.58173	0.00983058	0.382666
NM_007506	162.649	-0.478466	0.24114	-1.98419	0.0472348	0.497508
NM_001163479	2055.79	-0.478462	0.239299	-1.99943	0.045562	0.497508
NR_028097	2055.79	-0.478462	0.239299	-1.99943	0.045562	0.497508
NR_028098	2055.79	-0.478462	0.239299	-1.99943	0.045562	0.497508
NM_001161419	162.555	-0.478379	0.241515	-1.98074	0.0476207	0.497508
NM_001025589	132.257	-0.478349	0.221142	-2.16308	0.0305347	0.462857
NM_011266	132.257	-0.478349	0.221142	-2.16308	0.0305347	0.462857
NM_011361	1497.91	-0.478193	0.23092	-2.07081	0.0383764	0.487342
NM_001271443	158.747	-0.478163	0.276081	-1.73197	0.0832793	0.557848
NM_001271444	158.747	-0.478163	0.276081	-1.73197	0.0832793	0.557848
NM_144870	158.747	-0.478163	0.276081	-1.73197	0.0832793	0.557848
NM_025995	1158.56	-0.478079	0.227904	-2.09772	0.0359298	0.483373
NM_013614	2053.47	-0.477563	0.224369	-2.12848	0.0332976	0.473154
NM_001256100	283.83	-0.477476	0.228393	-2.09059	0.0365645	0.483373
NM_001256101	283.83	-0.477476	0.228393	-2.09059	0.0365645	0.483373
NM_001256102	283.83	-0.477476	0.228393	-2.09059	0.0365645	0.483373
NM_029581	283.83	-0.477476	0.228393	-2.09059	0.0365645	0.483373
NM_001164233	28.1172	-0.477431	0.373658	-1.27772	0.201347	NA
NM_027584	28.1172	-0.477431	0.373658	-1.27772	0.201347	NA
NM_001168656	498.516	-0.477293	0.273262	-1.74665	0.0806981	0.555054
NM_001166364	230.892	-0.47722	0.22464	-2.12438	0.0336386	0.475204
NM_175273	230.892	-0.47722	0.22464	-2.12438	0.0336386	0.475204
NM_001030014	308.085	-0.477205	0.217992	-2.1891	0.0285898	0.461944
NM_001146012	314.47	-0.477179	0.192705	-2.47622	0.0132782	0.414265
NM_008538	563.249	-0.477167	0.222801	-2.14167	0.0322201	0.469242
NM_011778	322.077	-0.477105	0.253224	-1.88413	0.059548	0.52164
NM_010942	79.5868	-0.477032	0.342652	-1.39218	0.163869	0.605298
NM_001037932	12.1457	-0.476746	0.456878	-1.04349	0.296723	NA
NM_008686	1515.24	-0.476377	0.202685	-2.35033	0.0187567	0.434931
NM_010155	702.768	-0.476325	0.20788	-2.29134	0.0219436	0.441926
NM_009098	902.868	-0.476186	0.22995	-2.07082	0.0383755	0.487342
NM_030689	63.1493	-0.476011	0.327997	-1.45127	0.146705	0.591732
NM_026505	246.501	-0.475997	0.258643	-1.84036	0.0657149	0.540794
NM_145851	372.086	-0.475869	0.269375	-1.76656	0.0773013	0.551692
NM_009082	683.324	-0.475684	0.253847	-1.8739	0.0609444	0.526988
NM_010439	708.255	-0.475527	0.206431	-2.30356	0.0212472	0.440874
NM_175450	590.979	-0.47516	0.212331	-2.23782	0.0252326	0.449299
NM_001081041	288.793	-0.47483	0.225394	-2.10666	0.0351469	0.483373
NM_001166644	218.831	-0.474721	0.322214	-1.47331	0.140668	0.588929
NR_045893	2133.2	-0.474502	0.197243	-2.40567	0.0161429	0.415565
NM_026909	169.13	-0.474407	0.311501	-1.52297	0.127766	0.581002
NM_001301652	314.304	-0.474286	0.193238	-2.45441	0.0141117	0.415565
NM_030685	541.501	-0.47428	0.244766	-1.93769	0.0526615	0.511118
NM_133840	235.54	-0.474263	0.270479	-1.75342	0.0795295	0.553108
NM_053246	51.8094	-0.474203	0.309392	-1.53269	0.125352	0.5789
NM_001161849	1540.97	-0.473993	0.22794	-2.07947	0.0375742	0.487342
NM_138596	452.475	-0.473983	0.216886	-2.1854	0.0288595	0.462169
NM_001004155	39.6515	-0.473887	0.350008	-1.35394	0.175757	0.609556
NM_001112735	39.6515	-0.473887	0.350008	-1.35394	0.175757	0.609556
NM_001004144	645.373	-0.473882	0.246436	-1.92294	0.054488	0.511703
NR_033780	91.5154	-0.473658	0.298095	-1.58895	0.112071	0.573
NM_133185	105.714	-0.473368	0.248201	-1.9072	0.056495	0.518174
NM_019696	89.7623	-0.473365	0.269906	-1.75382	0.0794621	0.553108
NM_013415	44.0845	-0.47331	0.391447	-1.20913	0.226613	0.634137
NM_008078	21.9972	-0.473017	0.414733	-1.14053	0.254064	NA
NM_172612	50.5943	-0.472989	0.301786	-1.5673	0.117045	0.573435
NM_001135611	82.0459	-0.472961	0.289427	-1.63413	0.102232	0.569236
NM_199145	82.0459	-0.472961	0.289427	-1.63413	0.102232	0.569236
NM_001304329	143.237	-0.472569	0.372677	-1.26804	0.204785	0.624082
NM_001304330	143.237	-0.472569	0.372677	-1.26804	0.204785	0.624082
NM_198119	24.6642	-0.472443	0.359282	-1.31497	0.188521	NA
NR_040719	107.563	-0.472098	0.274997	-1.71674	0.0860271	0.558866
NM_033617	188.011	-0.471963	0.243988	-1.93437	0.0530677	0.511118
NM_001145300	18.5704	-0.471917	0.379789	-1.24258	0.214023	NA
NM_001291015	18.5704	-0.471917	0.379789	-1.24258	0.214023	NA
NM_001024139	180.85	-0.471838	0.287004	-1.64401	0.100174	0.568792
NM_001291071	1980.25	-0.471557	0.218245	-2.16067	0.0307205	0.462857
NM_019703	1980.25	-0.471557	0.218245	-2.16067	0.0307205	0.462857
NM_001205070	71.1202	-0.471339	0.304216	-1.54936	0.121296	0.573435
NM_001205071	71.1202	-0.471339	0.304216	-1.54936	0.121296	0.573435
NM_001205072	71.1202	-0.471339	0.304216	-1.54936	0.121296	0.573435
NM_001205073	71.1202	-0.471339	0.304216	-1.54936	0.121296	0.573435
NM_025368	71.1202	-0.471339	0.304216	-1.54936	0.121296	0.573435
NM_025383	413.575	-0.471205	0.203992	-2.30992	0.0208925	0.440437
NM_009790	1344.16	-0.471151	0.184883	-2.54837	0.0108227	0.396067
NM_175329	229.7	-0.47106	0.255832	-1.84129	0.0655791	0.540295
NM_029510	1346.98	-0.470905	0.177115	-2.65875	0.00784318	0.365732
NM_175044	1346.98	-0.470905	0.177115	-2.65875	0.00784318	0.365732
NM_175045	1346.98	-0.470905	0.177115	-2.65875	0.00784318	0.365732
NM_175046	1346.98	-0.470905	0.177115	-2.65875	0.00784318	0.365732
NM_001166627	89.308	-0.470419	0.270365	-1.73994	0.0818696	0.556159
NM_001166630	89.308	-0.470419	0.270365	-1.73994	0.0818696	0.556159
NM_177448	32.729	-0.470171	0.462505	-1.01657	0.309356	NA
NM_001177609	3032.36	-0.470036	0.182057	-2.58181	0.00982842	0.382666
NM_008949	132.308	-0.469972	0.273792	-1.71653	0.0860645	0.558866
NM_001042659	558.522	-0.469946	0.287603	-1.63401	0.102256	0.569236
NM_022721	558.522	-0.469946	0.287603	-1.63401	0.102256	0.569236
NM_010612	45.3642	-0.469912	0.418406	-1.1231	0.261396	0.651307
NM_022424	38.7039	-0.469769	0.333737	-1.4076	0.15925	0.602039
NM_001256515	88.7545	-0.46976	0.250851	-1.87267	0.0611146	0.526988
NM_134149	88.7545	-0.46976	0.250851	-1.87267	0.0611146	0.526988
NM_001130450	1504.4	-0.469583	0.202297	-2.32125	0.0202733	0.440437
NM_011658	26.2394	-0.469531	0.416815	-1.12647	0.259966	NA
NM_025980	27.6831	-0.469457	0.393897	-1.19183	0.233329	NA
NM_026490	221.819	-0.469285	0.194631	-2.41115	0.0159023	0.415565
NM_009507	338.118	-0.46918	0.243855	-1.92401	0.054353	0.511703
NM_021431	70.1137	-0.469147	0.254588	-1.84277	0.0653625	0.539008
NM_172878	4.98651	-0.469128	0.56664	-0.827912	0.40772	NA
NR_033549	11.525	-0.469094	0.486751	-0.963723	0.335185	NA
NM_001160378	62.4791	-0.468912	0.288222	-1.62691	0.103756	0.569526
NM_001160379	62.4791	-0.468912	0.288222	-1.62691	0.103756	0.569526
NM_011665	3035.77	-0.468878	0.181826	-2.57871	0.0099169	0.383193
NM_183182	84.6888	-0.468543	0.282206	-1.66029	0.096857	0.567004
NM_145387	121.671	-0.468452	0.319792	-1.46486	0.142958	0.590351
NM_001164709	227.288	-0.468424	0.23002	-2.03645	0.0417056	0.493498
NM_007573	1061.22	-0.467963	0.213557	-2.19128	0.0284318	0.461944
NM_001166629	140.275	-0.467879	0.209864	-2.22944	0.0257846	0.451505
NM_026063	381.192	-0.467799	0.249199	-1.87721	0.0604888	0.524643
NM_153796	439.853	-0.467759	0.225285	-2.0763	0.0378661	0.487342
NM_017406	219.559	-0.467302	0.237528	-1.96736	0.0491421	0.498584
NM_026729	404.515	-0.467035	0.190651	-2.44969	0.0142979	0.415565
NM_001128181	187.722	-0.466902	0.189139	-2.46857	0.0135654	0.414265
NM_001177610	3009.71	-0.466753	0.181181	-2.57617	0.00999022	0.384614
NM_177279	36.0099	-0.466504	0.348295	-1.33939	0.180443	0.612819
NM_001168655	520.484	-0.466398	0.269453	-1.7309	0.0834691	0.557848
NM_021338	1205.03	-0.466373	0.219659	-2.12316	0.0337401	0.475204
NM_001130484	1205.12	-0.466369	0.219679	-2.12295	0.0337578	0.475204
NR_045944	4.99086	-0.466298	0.565801	-0.824138	0.409861	NA
NM_001014390	349.279	-0.466285	0.230653	-2.02159	0.043219	0.496586
NM_001163793	148.182	-0.466203	0.271535	-1.71692	0.0859946	0.558866
NM_025580	70.5971	-0.466038	0.263964	-1.76553	0.0774743	0.551692
NM_010143	653.978	-0.465998	0.16394	-2.84249	0.00447628	0.346017
NR_045294	25.1262	-0.465692	0.366251	-1.27151	0.203547	NA
NM_183285	349.779	-0.465529	0.216477	-2.15048	0.0315176	0.465995
NM_027834	148.095	-0.465485	0.254288	-1.83054	0.067169	0.544034
NM_001130485	1205.32	-0.465446	0.219693	-2.11862	0.0341224	0.477147
NM_153583	261.299	-0.465333	0.244565	-1.9027	0.0570799	0.518705
NM_001302511	64.3264	-0.465293	0.312957	-1.48676	0.137078	0.586385
NM_175675	344.346	-0.464928	0.250361	-1.85703	0.0633071	0.534643
NM_001081120	41.5695	-0.464777	0.334417	-1.38981	0.164585	0.605298
NM_011716	235.445	-0.46472	0.247392	-1.87848	0.0603157	0.523721
NM_007713	1020.18	-0.464717	0.179294	-2.59193	0.00954396	0.378553
NM_028769	231.92	-0.46459	0.233504	-1.98964	0.0466303	0.497508
NM_001272041	43.5944	-0.464289	0.46815	-0.991753	0.321318	0.681228
NM_009606	43.5944	-0.464289	0.46815	-0.991753	0.321318	0.681228
NM_025596	518.556	-0.464232	0.244633	-1.89767	0.0577401	0.519633
NM_001102563	36.144	-0.464199	0.305027	-1.52183	0.128053	0.581002
NM_010359	12.9062	-0.463996	0.503739	-0.921105	0.356996	NA
NM_026211	373.253	-0.463974	0.240095	-1.93245	0.0533034	0.511348
NM_183286	197.372	-0.46369	0.278287	-1.66623	0.0956682	0.566585
NM_001110159	252.124	-0.463677	0.230559	-2.0111	0.0443147	0.496586
NM_019761	252.124	-0.463677	0.230559	-2.0111	0.0443147	0.496586
NM_011288	231.683	-0.463646	0.199011	-2.32975	0.0198195	0.440437
NM_134024	152.327	-0.463504	0.245043	-1.89153	0.0585541	0.51975
NM_008782	26.3656	-0.463421	0.36812	-1.25889	0.208071	NA
NM_001105196	539.768	-0.463065	0.150472	-3.07743	0.00208797	0.226652
NM_001271489	539.768	-0.463065	0.150472	-3.07743	0.00208797	0.226652
NM_001271490	539.768	-0.463065	0.150472	-3.07743	0.00208797	0.226652
NM_172472	539.768	-0.463065	0.150472	-3.07743	0.00208797	0.226652
NM_011712	489.507	-0.462997	0.281292	-1.64596	0.0997714	0.568666
NM_001165991	535.117	-0.462943	0.18326	-2.52616	0.0115318	0.396988
NM_001165992	535.117	-0.462943	0.18326	-2.52616	0.0115318	0.396988
NM_001165995	535.117	-0.462943	0.18326	-2.52616	0.0115318	0.396988
NM_029702	535.117	-0.462943	0.18326	-2.52616	0.0115318	0.396988
NR_028585	535.117	-0.462943	0.18326	-2.52616	0.0115318	0.396988
NM_172116	117.386	-0.462503	0.263828	-1.75305	0.0795932	0.553206
NM_138601	164.855	-0.462327	0.219997	-2.10152	0.0355955	0.483373
NR_029441	68.1539	-0.462161	0.326068	-1.41738	0.156373	0.598182
NM_028809	474.463	-0.462033	0.191887	-2.40783	0.0160474	0.415565
NM_183263	274.281	-0.461826	0.198356	-2.32826	0.0198982	0.440437
NM_177099	271.349	-0.461407	0.342208	-1.34832	0.177555	0.610907
NM_029236	150.552	-0.461337	0.232122	-1.98748	0.0468696	0.497508
NM_010174	644.969	-0.461046	0.275601	-1.67287	0.0943525	0.565863
NM_001130443	110.832	-0.460698	0.257478	-1.78927	0.0735715	0.551646
NM_001130444	110.832	-0.460698	0.257478	-1.78927	0.0735715	0.551646
NM_008284	110.832	-0.460698	0.257478	-1.78927	0.0735715	0.551646
NM_023665	1423.96	-0.460562	0.217057	-2.12184	0.0338509	0.475561
NM_023124	10.9665	-0.460324	0.474033	-0.971079	0.331509	NA
NM_207648	10.9665	-0.460324	0.474033	-0.971079	0.331509	NA
NM_011978	692.844	-0.460054	0.214907	-2.14071	0.0322971	0.470038
NM_001164790	15.2465	-0.459605	0.395586	-1.16183	0.245303	NA
NM_009130	15.2465	-0.459605	0.395586	-1.16183	0.245303	NA
NM_016658	71.0787	-0.459531	0.308059	-1.4917	0.135778	0.585744
NM_001282977	226.777	-0.459476	0.28857	-1.59225	0.111328	0.571694
NM_145121	226.777	-0.459476	0.28857	-1.59225	0.111328	0.571694
NM_021557	448.429	-0.459189	0.191147	-2.40228	0.0162934	0.415906
NM_001160411	21.9714	-0.459109	0.363474	-1.26311	0.206549	NA
NM_026764	21.9714	-0.459109	0.363474	-1.26311	0.206549	NA
NM_001190703	54.0834	-0.459004	0.403651	-1.13713	0.255483	0.646415
NM_001190704	54.0834	-0.459004	0.403651	-1.13713	0.255483	0.646415
NM_001190705	54.0834	-0.459004	0.403651	-1.13713	0.255483	0.646415
NM_010052	54.0834	-0.459004	0.403651	-1.13713	0.255483	0.646415
NR_033813	54.0834	-0.459004	0.403651	-1.13713	0.255483	0.646415
NM_001130451	903.261	-0.458845	0.213849	-2.14565	0.0319005	0.467172
NM_001130452	903.261	-0.458845	0.213849	-2.14565	0.0319005	0.467172
NM_145577	57.5762	-0.45881	0.288437	-1.59068	0.111682	0.572477
NM_018796	2511.83	-0.458775	0.22633	-2.02702	0.0426603	0.4951
NM_009080	1351.56	-0.458594	0.228165	-2.00992	0.0444393	0.496586
NR_003373	1351.56	-0.458594	0.228165	-2.00992	0.0444393	0.496586
NM_177049	56.3408	-0.458199	0.32552	-1.40759	0.159252	0.602039
NM_008319	18.2767	-0.458107	0.394329	-1.16174	0.245342	NA
NM_001289591	15.9319	-0.457889	0.48158	-0.950805	0.341703	NA
NM_001289592	15.9319	-0.457889	0.48158	-0.950805	0.341703	NA
NM_028261	15.9319	-0.457889	0.48158	-0.950805	0.341703	NA
NM_001139503	135.336	-0.457779	0.282926	-1.61802	0.105658	0.570292
NM_001139504	135.336	-0.457779	0.282926	-1.61802	0.105658	0.570292
NM_026828	135.336	-0.457779	0.282926	-1.61802	0.105658	0.570292
NM_001130453	902.518	-0.457734	0.213576	-2.14318	0.0320983	0.468764
NM_001130454	902.518	-0.457734	0.213576	-2.14318	0.0320983	0.468764
NM_001040072	725.245	-0.457579	0.22026	-2.07745	0.0377601	0.487342
NM_001311128	50.2208	-0.457506	0.396901	-1.15269	0.249036	0.644247
NM_153131	50.2208	-0.457506	0.396901	-1.15269	0.249036	0.644247
NM_181548	99.3996	-0.457492	0.254194	-1.79978	0.0718961	0.547343
NM_030259	60.015	-0.457415	0.274683	-1.66525	0.0958633	0.56664
NM_026994	1718.15	-0.457144	0.192222	-2.37821	0.0173971	0.42466
NM_133679	1718.15	-0.457144	0.192222	-2.37821	0.0173971	0.42466
NM_007726	159.539	-0.456683	0.23149	-1.9728	0.0485187	0.497508
NM_008302	7047.81	-0.456602	0.270125	-1.69033	0.090964	0.564767
NM_133967	246.585	-0.456509	0.186161	-2.45223	0.0141973	0.415565
NM_001164528	153.811	-0.456259	0.30631	-1.48953	0.136347	0.585744
NR_040409	14.9405	-0.456203	0.473564	-0.96334	0.335377	NA
NM_001167669	682.624	-0.456066	0.217687	-2.09505	0.0361665	0.483373
NM_172561	682.624	-0.456066	0.217687	-2.09505	0.0361665	0.483373
NM_001289813	119.004	-0.455886	0.250631	-1.81895	0.0689192	0.544034
NM_001289814	119.004	-0.455886	0.250631	-1.81895	0.0689192	0.544034
NR_110380	119.004	-0.455886	0.250631	-1.81895	0.0689192	0.544034
NM_001252413	227.431	-0.455843	0.246344	-1.85043	0.0642514	0.536507
NM_001252414	227.431	-0.455843	0.246344	-1.85043	0.0642514	0.536507
NM_001252415	227.431	-0.455843	0.246344	-1.85043	0.0642514	0.536507
NM_027186	227.431	-0.455843	0.246344	-1.85043	0.0642514	0.536507
NM_001164607	116.472	-0.455557	0.305679	-1.49031	0.136142	0.585744
NM_001164608	116.472	-0.455557	0.305679	-1.49031	0.136142	0.585744
NM_026859	116.472	-0.455557	0.305679	-1.49031	0.136142	0.585744
NM_001301853	1030.53	-0.455388	0.183283	-2.48461	0.0129692	0.412433
NM_146226	279.788	-0.455348	0.282743	-1.61046	0.107297	0.570913
NM_001306184	159.922	-0.45532	0.23105	-1.97066	0.048763	0.497508
NM_008606	159.922	-0.45532	0.23105	-1.97066	0.048763	0.497508
NM_021273	310.65	-0.455146	0.30104	-1.51191	0.130556	0.582267
NM_025573	455.232	-0.45449	0.212491	-2.13887	0.032446	0.470903
NR_036616	455.232	-0.45449	0.212491	-2.13887	0.032446	0.470903
NM_175106	127.23	-0.454475	0.275591	-1.64909	0.0991285	0.567852
NM_020600	2102.2	-0.454191	0.215124	-2.11129	0.034747	0.481723
NM_001081005	2304.14	-0.454051	0.225276	-2.01553	0.0438488	0.496586
NM_020497	329.05	-0.4539	0.202948	-2.23654	0.0253167	0.450006
NM_030240	121.285	-0.453779	0.203363	-2.23137	0.0256563	0.451505
NM_019726	94.6336	-0.453643	0.334517	-1.35611	0.175063	0.609144
NM_031868	477.533	-0.453374	0.25855	-1.75353	0.0795116	0.553108
NM_146217	1925.16	-0.453262	0.165032	-2.74651	0.00602323	0.348571
NM_001114116	51.2569	-0.453218	0.345368	-1.31227	0.189428	0.616925
NM_016663	51.2569	-0.453218	0.345368	-1.31227	0.189428	0.616925
NM_145152	50.4485	-0.453166	0.391786	-1.15667	0.247408	0.644247
NM_011065	215.648	-0.453128	0.254616	-1.77965	0.0751329	0.551646
NM_177727	442.218	-0.453098	0.229246	-1.97647	0.0481012	0.497508
NM_001302334	148.465	-0.453057	0.215907	-2.09839	0.0358706	0.483373
NM_001302335	148.465	-0.453057	0.215907	-2.09839	0.0358706	0.483373
NM_001302336	148.465	-0.453057	0.215907	-2.09839	0.0358706	0.483373
NM_026035	148.465	-0.453057	0.215907	-2.09839	0.0358706	0.483373
NR_126101	148.465	-0.453057	0.215907	-2.09839	0.0358706	0.483373
NM_173052	24.864	-0.453031	0.401871	-1.1273	0.259614	NA
NR_033481	14.3437	-0.453005	0.383816	-1.18027	0.237894	NA
NR_040708	897.776	-0.452813	0.149544	-3.02796	0.00246209	0.251631
NM_025945	363.053	-0.452695	0.238509	-1.89802	0.057693	0.519633
NM_001122829	1458.29	-0.452569	0.176713	-2.56103	0.0104362	0.391757
NM_030680	1458.29	-0.452569	0.176713	-2.56103	0.0104362	0.391757
NM_007693	44.5069	-0.452535	0.304087	-1.48817	0.136705	0.585969
NM_001081144	1802.24	-0.452459	0.198419	-2.28032	0.0225884	0.442502
NM_001177902	1802.24	-0.452459	0.198419	-2.28032	0.0225884	0.442502
NM_001141921	249.34	-0.452335	0.2722	-1.66178	0.0965574	0.567004
NM_025613	66.3991	-0.452312	0.33798	-1.33828	0.180805	0.612819
NM_177692	40.5643	-0.452044	0.286712	-1.57665	0.114876	0.573435
NM_053119	347.084	-0.451956	0.167059	-2.70537	0.0068228	0.352867
NM_009053	78.9166	-0.451817	0.262036	-1.72426	0.0846613	0.557848
NM_183170	38.0994	-0.451762	0.343353	-1.31573	0.188263	0.615913
NM_053082	360.385	-0.451723	0.228381	-1.97793	0.0479361	0.497508
NM_001177369	101.994	-0.451608	0.330733	-1.36548	0.172103	0.60648
NM_020581	74.0644	-0.45159	0.293004	-1.54124	0.123258	0.574903
NM_001159384	140.794	-0.451442	0.270044	-1.67174	0.094576	0.565863
NM_001159385	140.794	-0.451442	0.270044	-1.67174	0.094576	0.565863
NM_011550	140.794	-0.451442	0.270044	-1.67174	0.094576	0.565863
NM_010724	9.31796	-0.451314	0.531125	-0.849732	0.395474	NA
NM_001168497	132.422	-0.451302	0.28809	-1.56653	0.117224	0.573435
NM_023564	132.017	-0.451248	0.288464	-1.56431	0.117744	0.573435
NR_033133	132.017	-0.451248	0.288464	-1.56431	0.117744	0.573435
NM_001164082	360.382	-0.45109	0.239061	-1.88693	0.0591703	0.521548
NM_023503	173.344	-0.451014	0.196155	-2.29927	0.0214896	0.441926
NR_015507	207.611	-0.45089	0.208439	-2.16318	0.0305277	0.462857
NM_016665	56.4009	-0.450645	0.272832	-1.65173	0.0985897	0.567004
NM_001177981	67.5141	-0.450615	0.348661	-1.29242	0.196213	0.622065
NM_001128180	197.286	-0.45035	0.194584	-2.31442	0.0206447	0.440437
NM_173013	827.353	-0.45035	0.169703	-2.65376	0.00796011	0.365732
NM_010565	17.1592	-0.450272	0.401627	-1.12112	0.262237	NA
NM_001305231	112.597	-0.450259	0.275015	-1.63722	0.101586	0.568792
NM_170755	112.597	-0.450259	0.275015	-1.63722	0.101586	0.568792
NM_009391	1383.86	-0.449795	0.226046	-1.98984	0.0466087	0.497508
NM_001013414	499.594	-0.449707	0.214671	-2.09487	0.0361827	0.483373
NM_001291118	499.594	-0.449707	0.214671	-2.09487	0.0361827	0.483373
NM_001291119	499.594	-0.449707	0.214671	-2.09487	0.0361827	0.483373
NM_028041	790.298	-0.449385	0.206405	-2.1772	0.0294653	0.462857
NM_008179	108.479	-0.449035	0.279818	-1.60474	0.108551	0.571436
NM_010276	66.5476	-0.449028	0.393704	-1.14052	0.254069	0.646415
NM_001195413	59.6922	-0.448888	0.323876	-1.38599	0.165751	0.605298
NM_133924	95.8446	-0.448824	0.323262	-1.38842	0.165008	0.605298
NM_027712	199.741	-0.44865	0.196403	-2.28434	0.0223516	0.442389
NM_001199271	387.389	-0.448565	0.16746	-2.67864	0.0073922	0.36325
NM_001252529	73.5395	-0.448436	0.265483	-1.68913	0.091194	0.564943
NM_001166377	167.009	-0.44822	0.268534	-1.66914	0.0950905	0.565863
NM_001166378	167.009	-0.44822	0.268534	-1.66914	0.0950905	0.565863
NM_001166379	167.009	-0.44822	0.268534	-1.66914	0.0950905	0.565863
NM_001166380	167.009	-0.44822	0.268534	-1.66914	0.0950905	0.565863
NM_030066	167.009	-0.44822	0.268534	-1.66914	0.0950905	0.565863
NM_008131	897.495	-0.448145	0.184006	-2.43549	0.0148717	0.415565
NM_001291275	157.795	-0.448083	0.199365	-2.24755	0.0246047	0.446459
NM_001291276	157.795	-0.448083	0.199365	-2.24755	0.0246047	0.446459
NM_011870	157.795	-0.448083	0.199365	-2.24755	0.0246047	0.446459
NM_010219	1434.97	-0.448003	0.217146	-2.06314	0.0390993	0.488417
NM_025305	267.022	-0.447982	0.242789	-1.84515	0.0650164	0.538232
NM_026774	201.927	-0.447701	0.214986	-2.08247	0.0373	0.485476
NM_001278271	83.5964	-0.447179	0.257734	-1.73504	0.0827329	0.557848
NM_001278272	83.5964	-0.447179	0.257734	-1.73504	0.0827329	0.557848
NR_103489	83.5964	-0.447179	0.257734	-1.73504	0.0827329	0.557848
NM_183023	154.033	-0.447165	0.271298	-1.64824	0.0993027	0.567986
NM_001033132	278.122	-0.44711	0.206773	-2.16233	0.0305929	0.462857
NM_001168592	278.122	-0.44711	0.206773	-2.16233	0.0305929	0.462857
NM_007909	48.7188	-0.447072	0.317018	-1.41024	0.158469	0.600828
NM_025302	184.438	-0.446973	0.222945	-2.00485	0.0449787	0.49672
NM_001033204	71.9448	-0.446948	0.283835	-1.57467	0.115332	0.573435
NM_028024	144.515	-0.446757	0.255652	-1.74752	0.0805472	0.555054
NR_040510	10.4684	-0.446755	0.472805	-0.944904	0.344708	NA
NM_001277992	241.078	-0.446596	0.225573	-1.97983	0.0477226	0.497508
NM_011494	241.078	-0.446596	0.225573	-1.97983	0.0477226	0.497508
NR_102731	241.078	-0.446596	0.225573	-1.97983	0.0477226	0.497508
NM_001302440	220.976	-0.446587	0.267793	-1.66766	0.0953842	0.566308
NM_007441	35.4427	-0.44656	0.469825	-0.95048	0.341868	NA
NM_172676	46.9281	-0.446338	0.36693	-1.21641	0.223828	0.632878
NM_016852	410.131	-0.446245	0.174919	-2.55115	0.010737	0.396067
NM_009875	252.827	-0.44618	0.250166	-1.78353	0.0744996	0.551646
NM_030093	90.8046	-0.446178	0.31402	-1.42086	0.155358	0.597229
NM_001310055	512.893	-0.446152	0.176879	-2.52235	0.0116573	0.396988
NM_139001	16.7325	-0.446012	0.475821	-0.937353	0.348577	NA
NM_201372	237.951	-0.44597	0.200356	-2.22588	0.026022	0.4526
NM_001310647	2227.79	-0.445866	0.244009	-1.82725	0.0676619	0.544034
NM_001007578	9.7652	-0.445804	0.529606	-0.841766	0.399919	NA
NM_031196	387.115	-0.445798	0.167218	-2.66597	0.00767664	0.364927
NM_001126047	145.103	-0.445675	0.373354	-1.19371	0.232592	0.63878
NM_025831	511.63	-0.445648	0.295082	-1.51025	0.130979	0.582292
NM_009366	2224.45	-0.445498	0.244291	-1.82363	0.0682075	0.544034
NM_008353	9.74721	-0.44544	0.49003	-0.909005	0.363347	NA
NM_001038708	417.092	-0.445436	0.219179	-2.03229	0.0421243	0.493498
NM_001291033	281.495	-0.445409	0.261792	-1.70139	0.0888704	0.559823
NM_001291034	281.495	-0.445409	0.261792	-1.70139	0.0888704	0.559823
NM_001291035	281.495	-0.445409	0.261792	-1.70139	0.0888704	0.559823
NM_001291036	281.495	-0.445409	0.261792	-1.70139	0.0888704	0.559823
NM_001291037	281.495	-0.445409	0.261792	-1.70139	0.0888704	0.559823
NM_011841	281.495	-0.445409	0.261792	-1.70139	0.0888704	0.559823
NM_029836	151.861	-0.445218	0.244125	-1.82373	0.068193	0.544034
NM_001163836	31.2927	-0.445187	0.413486	-1.07667	0.281628	NA
NM_177639	203.285	-0.444868	0.196607	-2.26273	0.0236525	0.442815
NM_008381	47.811	-0.444814	0.558156	-0.796934	0.425489	0.739244
NM_001267808	66.8877	-0.44459	0.344578	-1.29024	0.196966	0.622065
NM_001252463	231.943	-0.444437	0.285785	-1.55515	0.119911	0.573435
NM_001252464	231.943	-0.444437	0.285785	-1.55515	0.119911	0.573435
NM_001252465	231.943	-0.444437	0.285785	-1.55515	0.119911	0.573435
NM_019988	231.943	-0.444437	0.285785	-1.55515	0.119911	0.573435
NM_013892	25.9566	-0.443983	0.365264	-1.21551	0.224171	NA
NM_175307	98.1875	-0.443905	0.323095	-1.37392	0.169468	0.605298
NM_001302439	222.041	-0.443675	0.267948	-1.65583	0.097757	0.567004
NM_026057	222.041	-0.443675	0.267948	-1.65583	0.097757	0.567004
NM_008568	1915.88	-0.443586	0.243457	-1.82203	0.0684505	0.544034
NM_001308091	101.036	-0.443455	0.215839	-2.05456	0.0399213	0.491554
NM_001304956	51.4704	-0.443	0.38294	-1.15684	0.247337	0.644247
NM_008690	51.4704	-0.443	0.38294	-1.15684	0.247337	0.644247
NM_175770	529.524	-0.442978	0.245998	-1.80074	0.0717445	0.547343
NM_146205	154.753	-0.442955	0.213446	-2.07526	0.0379626	0.487342
NM_024266	1120.69	-0.442833	0.194184	-2.28048	0.0225794	0.442502
NM_001033489	35.3928	-0.442809	0.41011	-1.07973	0.280262	NA
NM_001013360	765.16	-0.442778	0.219912	-2.01343	0.0440695	0.496586
NM_001013362	765.16	-0.442778	0.219912	-2.01343	0.0440695	0.496586
NM_001297606	397.25	-0.442763	0.212418	-2.08439	0.0371243	0.485025
NM_001297607	397.25	-0.442763	0.212418	-2.08439	0.0371243	0.485025
NM_009010	397.25	-0.442763	0.212418	-2.08439	0.0371243	0.485025
NM_001177988	175.4	-0.442742	0.22594	-1.95956	0.0500475	0.501795
NM_133926	79.912	-0.442317	0.255844	-1.72885	0.0838353	0.557848
NM_001305798	676.231	-0.442189	0.253505	-1.7443	0.0811062	0.556159
NM_021565	676.231	-0.442189	0.253505	-1.7443	0.0811062	0.556159
NM_028128	1216.53	-0.442168	0.169413	-2.61	0.00905426	0.369523
NM_172395	423.071	-0.441995	0.219934	-2.00967	0.0444663	0.496586
[truncated: 21,402 more rows]

## Sheet: 2. Expression RAvsESC
	baseMean	log2FoldChange	lfcSE	stat	pvalue	padj
NM_001079869	649.984	8.23863	0.371127	22.199	3.51559e-109	1.17516e-105
NR_015543	2307.77	6.90803	0.277742	24.8721	1.49017e-136	1.14207e-132
NM_010459	131.285	6.66332	0.438389	15.1995	3.56077e-52	1.28182e-49
NM_009292	1130.82	6.43452	0.25847	24.8947	8.4945e-137	9.93814e-133
NM_010452	379.813	6.28162	0.305878	20.5363	1.01946e-93	2.38544e-90
NM_010458	77.6674	6.20904	0.459786	13.5042	1.47744e-41	2.33586e-39
NM_134032	88.5662	5.96688	0.438998	13.592	4.46483e-42	7.79645e-40
NM_010453	87.0245	5.91756	0.429558	13.7759	3.55768e-43	7.05475e-41
NM_008266	66.0438	5.8221	0.445498	13.0687	4.96846e-39	7.04588e-37
NM_001162476	142.934	5.80111	0.375023	15.4687	5.645e-54	2.44606e-51
NM_001162479	141.525	5.79504	0.375143	15.4475	7.83859e-54	3.27527e-51
NM_001177713	343.41	5.79435	0.358506	16.1625	9.27278e-59	5.70984e-56
NM_175475	343.316	5.79309	0.358656	16.1522	1.09568e-58	6.5738e-56
NR_131758	62.4099	5.76836	0.466053	12.377	3.47979e-35	4.09164e-33
NR_040725	128.469	5.7381	0.375579	15.278	1.07143e-52	3.91725e-50
NM_001289762	3819.54	5.69019	0.258205	22.0375	1.25798e-107	3.2706e-104
NM_011243	3819.54	5.69019	0.258205	22.0375	1.25798e-107	3.2706e-104
NM_009697	164.361	5.67907	0.3383	16.7871	3.03415e-63	2.2902e-60
NM_010181	3144.78	5.65797	0.1816	31.1561	4.18871e-213	9.80116e-209
NM_001162475	158.576	5.60714	0.360723	15.5442	1.74272e-54	8.322e-52
NM_009291	158.506	5.6068	0.360807	15.5396	1.87127e-54	8.75719e-52
NM_183261	190.07	5.59428	0.32	17.4821	1.96028e-68	2.29343e-65
NM_022814	198.93	5.49644	0.338322	16.2462	2.37639e-59	1.50284e-56
NR_131929	249.706	5.47437	0.293371	18.6602	1.04294e-77	1.74313e-74
NM_001007579	145.053	5.40133	0.395544	13.6555	1.87322e-42	3.31972e-40
NM_001039648	449.325	5.3462	0.288131	18.5548	7.46497e-77	9.70405e-74
NM_001100186	332.378	5.31815	0.326535	16.2866	1.22846e-59	8.21278e-57
NM_001289760	3896.66	5.28509	0.219196	24.1113	1.9046e-128	7.42764e-125
NM_001289761	3896.66	5.28509	0.219196	24.1113	1.9046e-128	7.42764e-125
NR_045850	68.5331	5.23404	0.397975	13.1517	1.66483e-39	2.40465e-37
NM_001013765	213.858	5.22283	0.38439	13.5873	4.76209e-42	8.25393e-40
NM_007811	217.68	5.19901	0.298575	17.4127	6.60794e-68	6.72257e-65
NR_077059	68.1805	5.19494	0.460687	11.2765	1.71374e-29	1.59126e-27
NM_020265	172.92	5.18825	0.355862	14.5794	3.79949e-48	1.1113e-45
NR_033707	319.62	5.09784	0.341181	14.9417	1.7633e-50	5.73049e-48
NM_001110316	103.482	5.01535	0.405037	12.3824	3.25329e-35	3.84615e-33
NM_053195	1175.11	5.00134	0.299977	16.6724	2.07942e-62	1.47444e-59
NM_001085412	296.686	4.96896	0.34791	14.2823	2.82104e-46	7.02228e-44
NM_001126315	151.64	4.89419	0.368326	13.2877	2.7301e-40	4.14816e-38
NM_029415	295.199	4.89112	0.280582	17.4321	4.71127e-68	5.01087e-65
NM_001185173	153.928	4.88965	0.371868	13.1489	1.72741e-39	2.47974e-37
NM_010468	230.599	4.87496	0.299311	16.2872	1.21594e-59	8.21278e-57
NM_011448	62.4686	4.87423	0.433824	11.2355	2.72899e-29	2.49436e-27
NM_178894	60.0888	4.82324	0.437688	11.0198	3.06692e-28	2.68775e-26
NR_027970	300.078	4.82316	0.255644	18.8667	2.14126e-79	3.85411e-76
NR_001584	232.787	4.80462	0.30569	15.7173	1.15139e-55	5.85681e-53
NM_001177565	84.2704	4.80248	0.411218	11.6787	1.63801e-31	1.6737e-29
NM_080455	409.092	4.78283	0.261627	18.2811	1.17088e-74	1.44196e-71
NM_176807	47.9813	4.77668	0.459609	10.3929	2.6701e-25	2.02193e-23
NM_001302257	2347.83	4.72573	0.344793	13.706	9.34631e-43	1.722e-40
NM_001302258	2347.83	4.72573	0.344793	13.706	9.34631e-43	1.722e-40
NM_001302261	2347.83	4.72573	0.344793	13.706	9.34631e-43	1.722e-40
NM_001302255	2345.69	4.72392	0.344802	13.7004	1.01025e-42	1.81838e-40
NM_008885	2345.69	4.72392	0.344802	13.7004	1.01025e-42	1.81838e-40
NM_001034896	237.575	4.72348	0.381467	12.3824	3.25457e-35	3.84615e-33
NM_001163172	237.575	4.72348	0.381467	12.3824	3.25457e-35	3.84615e-33
NM_001302259	2301.39	4.71504	0.344153	13.7004	1.00963e-42	1.81838e-40
NM_001302260	2295.6	4.713	0.343673	13.7136	8.41559e-43	1.58804e-40
NM_183221	157.161	4.69835	0.304128	15.4486	7.70957e-54	3.27527e-51
NM_001001979	454.55	4.68649	0.314588	14.8972	3.43577e-50	1.0864e-47
NM_001284524	487.192	4.68168	0.251745	18.5969	3.40237e-77	4.68307e-74
NM_001284525	487.192	4.68168	0.251745	18.5969	3.40237e-77	4.68307e-74
NM_027979	487.192	4.68168	0.251745	18.5969	3.40237e-77	4.68307e-74
NR_001585	170.302	4.66015	0.299378	15.5661	1.23693e-54	6.02975e-52
NM_010791	96.451	4.57503	0.559001	8.18431	2.73868e-16	8.88797e-15
NM_001034101	113.985	4.56896	0.398987	11.4514	2.31423e-30	2.25627e-28
NM_008268	17.6458	4.56116	0.507569	8.9863	2.55701e-19	1.18011e-17
NM_175730	34.3036	4.55296	0.459636	9.90556	3.93741e-23	2.45684e-21
NM_010469	66.7023	4.54261	0.398261	11.4061	3.89736e-30	3.73748e-28
NM_175013	160.837	4.54015	0.318898	14.237	5.40064e-46	1.2637e-43
NM_007831	275.8	4.53671	0.264306	17.1646	4.88562e-66	4.23402e-63
NR_045857	127.618	4.52726	0.348772	12.9806	1.57661e-38	2.20904e-36
NM_027964	124.814	4.51447	0.330611	13.6549	1.88693e-42	3.31972e-40
NM_001136072	8995.06	4.51009	0.327144	13.7863	3.08292e-43	6.16557e-41
NM_001159567	8995.06	4.51009	0.327144	13.7863	3.08292e-43	6.16557e-41
NM_001159568	8995.06	4.51009	0.327144	13.7863	3.08292e-43	6.16557e-41
NM_010825	8995.06	4.51009	0.327144	13.7863	3.08292e-43	6.16557e-41
NM_001159569	8969.67	4.5072	0.32726	13.7726	3.72756e-43	7.26843e-41
NM_001159570	8969.67	4.5072	0.32726	13.7726	3.72756e-43	7.26843e-41
NM_001128093	20.3158	4.49968	0.503841	8.93076	4.23102e-19	1.90155e-17
NM_008272	35.7688	4.47955	0.454118	9.8643	5.94488e-23	3.63197e-21
NM_011587	126.018	4.46817	0.335145	13.332	1.50707e-40	2.35092e-38
NM_145459	81.6913	4.46117	0.346831	12.8627	7.29996e-38	9.81677e-36
NM_027468	1337.33	4.46105	0.179438	24.8613	1.95234e-136	1.14207e-132
NM_008737	1182.65	4.4513	0.292881	15.1983	3.62667e-52	1.28576e-49
NR_073583	525.708	4.44222	0.235044	18.8996	1.15014e-79	2.24268e-76
NM_007666	759.054	4.43877	0.225017	19.7264	1.28049e-86	2.72382e-83
NM_001110222	46.8944	4.43859	0.403379	11.0035	3.67474e-28	3.16122e-26
NM_001110223	46.8944	4.43859	0.403379	11.0035	3.67474e-28	3.16122e-26
NM_001110224	46.8944	4.43859	0.403379	11.0035	3.67474e-28	3.16122e-26
NM_010025	46.8944	4.43859	0.403379	11.0035	3.67474e-28	3.16122e-26
NM_011127	105.846	4.43423	0.334627	13.2513	4.43738e-40	6.61339e-38
NM_175686	105.846	4.43423	0.334627	13.2513	4.43738e-40	6.61339e-38
NM_001013824	234.254	4.4311	0.358106	12.3737	3.62683e-35	4.24321e-33
NM_010332	203.751	4.42865	0.300843	14.7208	4.73842e-49	1.40347e-46
NM_001172686	29.9189	4.39586	0.475261	9.24937	2.25814e-20	1.13875e-18
NM_146922	29.9189	4.39586	0.475261	9.24937	2.25814e-20	1.13875e-18
NM_001177574	65.782	4.38525	0.40972	10.703	9.84986e-27	8.05863e-25
NM_001311118	126.737	4.38382	0.328935	13.3273	1.60631e-40	2.47276e-38
NM_010449	126.737	4.38382	0.328935	13.3273	1.60631e-40	2.47276e-38
NM_010466	32.2926	4.35712	0.455069	9.57464	1.02218e-21	5.5883e-20
NM_001304439	127.817	4.35011	0.326623	13.3185	1.8082e-40	2.76536e-38
NM_007963	758.944	4.31515	0.277006	15.5778	1.02988e-54	5.12725e-52
NM_001025570	87.2947	4.29606	0.342337	12.5492	4.01485e-36	5.02371e-34
NM_010151	83.5323	4.27897	0.376178	11.3749	5.5798e-30	5.32905e-28
NM_153778	44.9567	4.27506	0.419446	10.1922	2.14905e-24	1.47899e-22
NM_008026	247.571	4.27339	0.251187	17.0128	6.60448e-65	5.51922e-62
NM_001126324	29.9064	4.26824	0.479433	8.90269	5.45074e-19	2.41986e-17
NM_153102	93.9483	4.26752	0.367347	11.6171	3.37266e-31	3.40159e-29
NM_022026	168.245	4.24937	0.314103	13.5286	1.06041e-41	1.73514e-39
NR_073483	168.245	4.24937	0.314103	13.5286	1.06041e-41	1.73514e-39
NM_001122662	83.5235	4.24908	0.406816	10.4447	1.54897e-25	1.19225e-23
NM_001271843	168.159	4.24855	0.313845	13.5371	9.44231e-42	1.56695e-39
NM_013500	53.3006	4.24064	0.409815	10.3477	4.28762e-25	3.22592e-23
NM_001167976	852.406	4.22985	0.328392	12.8805	5.79503e-38	7.83804e-36
NR_045837	158.732	4.20526	0.313198	13.4268	4.20998e-41	6.61136e-39
NM_007887	65.4503	4.19779	0.398271	10.54	5.64722e-26	4.41938e-24
NM_172800	773.473	4.19282	0.284281	14.7489	3.12838e-49	9.50661e-47
NM_001270722	103.81	4.18339	0.366704	11.4081	3.81005e-30	3.66878e-28
NM_001101502	231.663	4.18107	0.334514	12.4989	7.56731e-36	9.36865e-34
NM_001110508	231.663	4.18107	0.334514	12.4989	7.56731e-36	9.36865e-34
NM_001085540	43.2158	4.17462	0.432254	9.65779	4.55603e-22	2.59383e-20
NM_011303	1453.76	4.17238	0.243049	17.1668	4.70274e-66	4.23229e-63
NM_001172424	1462.67	4.16689	0.241954	17.2218	1.82209e-66	1.7054e-63
NM_001101603	90.1161	4.16602	0.369775	11.2664	1.92329e-29	1.77178e-27
NM_172577	998.567	4.16454	0.307082	13.5617	6.758e-42	1.15424e-39
NM_001008231	107.386	4.16352	0.368019	11.3133	1.1274e-29	1.051e-27
NM_024450	363.286	4.16008	0.24771	16.7941	2.69365e-63	2.10096e-60
NM_009866	461.102	4.13896	0.277463	14.9172	2.54929e-50	8.17133e-48
NM_001013820	53.3325	4.10228	0.39762	10.3171	5.89886e-25	4.32688e-23
NM_001085516	297.272	4.09354	0.496645	8.24238	1.68822e-16	5.61069e-15
NR_033433	101.331	4.09251	0.346669	11.8052	3.6684e-32	3.90168e-30
NR_131144	19.1781	4.08201	0.482248	8.46454	2.57165e-17	9.18689e-16
NM_001162943	181.822	4.07805	0.288702	14.1254	2.6476e-45	6.07364e-43
NM_008265	15.9041	4.06189	0.499695	8.12875	4.33756e-16	1.38843e-14
NM_001289727	32.3445	4.0541	0.470152	8.62294	6.52558e-18	2.50726e-16
NM_001289728	32.1051	4.04608	0.470365	8.602	7.83383e-18	2.98055e-16
NM_172930	32.1051	4.04608	0.470365	8.602	7.83383e-18	2.98055e-16
NM_001080814	1089.6	4.04471	0.234031	17.2828	6.33878e-67	6.18004e-64
NM_010451	15.3771	4.04344	0.509201	7.94077	2.00937e-15	6.09822e-14
NM_009063	40.7344	4.02321	0.43065	9.34217	9.43776e-21	4.91835e-19
NM_013553	19.152	4.02307	0.470039	8.55902	1.13831e-17	4.20779e-16
NM_172603	129.708	4.0189	0.30344	13.2445	4.85683e-40	7.19272e-38
NM_001293561	485.161	4.01859	0.304972	13.1769	1.19208e-39	1.73252e-37
NM_009472	485.161	4.01859	0.304972	13.1769	1.19208e-39	1.73252e-37
NM_001081300	2312.81	3.98034	0.244471	16.2814	1.3368e-59	8.68883e-57
NM_001085414	24.6164	3.97746	0.472782	8.41289	4.00024e-17	1.42252e-15
NM_022888	15.5119	3.95875	0.513947	7.70263	1.33291e-14	3.71737e-13
NM_001172122	1930.09	3.94484	0.283965	13.892	7.08474e-44	1.48014e-41
NM_001172123	1930.09	3.94484	0.283965	13.892	7.08474e-44	1.48014e-41
NM_001172124	1930.09	3.94484	0.283965	13.892	7.08474e-44	1.48014e-41
NM_001172126	1930.09	3.94484	0.283965	13.892	7.08474e-44	1.48014e-41
NM_178660	1930.09	3.94484	0.283965	13.892	7.08474e-44	1.48014e-41
NM_001172121	1934.79	3.93782	0.282088	13.9595	2.75212e-44	6.01839e-42
NM_023256	81.0191	3.9254	0.32232	12.1786	4.04332e-34	4.5927e-32
NM_001085549	1071.15	3.90937	0.243893	16.029	8.01123e-58	4.26033e-55
NR_002870	51.0074	3.9044	0.571272	6.83456	NA	NA
NM_001243072	431.073	3.90408	0.287694	13.5702	6.01358e-42	1.03464e-39
NM_001243073	431.003	3.90354	0.28796	13.5558	7.31681e-42	1.2317e-39
NM_009152	431.003	3.90354	0.28796	13.5558	7.31681e-42	1.2317e-39
NM_024204	244.914	3.90248	0.304805	12.8032	1.57327e-37	2.05659e-35
NR_045331	57.2635	3.90126	0.43071	9.05774	1.33182e-19	6.37285e-18
NM_007555	108.705	3.89194	0.529541	7.34965	1.98721e-13	4.8792e-12
NM_001033790	36.3127	3.89132	0.444837	8.74774	2.17667e-18	8.98269e-17
NR_131181	255.747	3.88353	0.268656	14.4554	2.31767e-47	5.8313e-45
NM_009705	211.077	3.88087	0.286663	13.5381	9.31812e-42	1.55739e-39
NM_018779	433.867	3.87803	0.258425	15.0064	6.66501e-51	2.19654e-48
NR_033468	170.347	3.85421	0.320342	12.0316	2.42532e-33	2.70238e-31
NM_001167748	141.705	3.84747	0.248003	15.5138	2.79811e-54	1.2591e-51
NM_029412	141.705	3.84747	0.248003	15.5138	2.79811e-54	1.2591e-51
NM_001290308	913.942	3.83909	0.443589	8.6546	4.9464e-18	1.91942e-16
NM_008093	11.1655	3.81723	0.527807	7.23224	4.75107e-13	1.12634e-11
NM_054044	1152.5	3.81393	0.267918	14.2354	5.52075e-46	1.27901e-43
NM_001256973	118.906	3.80126	0.33102	11.4835	1.59736e-30	1.57045e-28
NR_033469	144.955	3.79151	0.326969	11.5959	4.32202e-31	4.34038e-29
NM_001310635	262.13	3.77014	0.293441	12.848	8.82244e-38	1.17293e-35
NM_030209	262.13	3.77014	0.293441	12.848	8.82244e-38	1.17293e-35
NM_011340	51.7785	3.7442	0.396393	9.44569	3.5308e-21	1.89055e-19
NM_008008	209.363	3.74407	0.251822	14.8679	5.32403e-50	1.63917e-47
NM_001024848	167.427	3.73303	0.287191	12.9984	1.24917e-38	1.76081e-36
NM_010465	18.365	3.73186	0.483144	7.72413	1.12622e-14	3.16355e-13
NM_001177573	35.511	3.72601	0.444658	8.37951	5.31483e-17	1.87292e-15
NM_001146701	17.1254	3.72524	0.506657	7.3526	1.94393e-13	4.77793e-12
NM_028843	17.1254	3.72524	0.506657	7.3526	1.94393e-13	4.77793e-12
NM_146563	63.2815	3.71919	0.368902	10.0818	6.64991e-24	4.42049e-22
NM_010089	38.9622	3.71761	0.445156	8.35124	6.75515e-17	2.35916e-15
NM_001081243	115.627	3.69765	0.332056	11.1356	8.41748e-29	7.54638e-27
NM_175499	9.12815	3.68224	0.555388	6.63003	3.35619e-11	6.59375e-10
NM_022563	511.771	3.68141	0.250012	14.7249	4.46155e-49	1.33841e-46
NR_015611	14.3065	3.66367	0.51209	7.15435	8.40719e-13	1.94965e-11
NM_001135172	28.2398	3.62804	0.462749	7.8402	4.49843e-15	1.31409e-13
NM_022315	186.835	3.61542	0.302846	11.9382	7.48425e-33	8.22178e-31
NM_001271508	129.047	3.60958	0.346902	10.4052	2.34754e-25	1.7951e-23
NM_019391	129.047	3.60958	0.346902	10.4052	2.34754e-25	1.7951e-23
NM_001104543	39.2127	3.60785	0.426116	8.46683	2.52163e-17	9.02196e-16
NM_001271523	99.7476	3.60012	0.371821	9.68239	3.58244e-22	2.04952e-20
NM_008489	57.0341	3.57652	0.361269	9.89989	4.16725e-23	2.59334e-21
NM_001034860	26.6333	3.56406	0.469212	7.59584	3.0581e-14	8.14066e-13
NM_008973	406.239	3.56389	0.303215	11.7537	6.76227e-32	7.09553e-30
NM_010258	387.984	3.56386	0.236253	15.085	2.03423e-51	6.89841e-49
NM_001038610	1636.33	3.5618	0.282143	12.6241	1.5551e-36	1.9669e-34
NM_007826	1636.33	3.5618	0.282143	12.6241	1.5551e-36	1.9669e-34
NM_028882	446.796	3.55115	0.258704	13.7267	7.02671e-43	1.33673e-40
NM_001136071	140.521	3.54016	0.33091	10.6983	1.03717e-26	8.39752e-25
NM_001271509	140.521	3.54016	0.33091	10.6983	1.03717e-26	8.39752e-25
NM_001271510	140.521	3.54016	0.33091	10.6983	1.03717e-26	8.39752e-25
NM_201409	36.9727	3.52897	0.448191	7.87381	3.43988e-15	1.02535e-13
NM_010461	14.4516	3.50722	0.492029	7.12807	1.01784e-12	2.32809e-11
NM_001033296	108.145	3.50721	0.283886	12.3543	4.61856e-35	5.3766e-33
NR_045808	104.496	3.50564	0.317036	11.0575	2.01573e-28	1.7866e-26
NM_053096	53.924	3.49956	0.400032	8.7482	2.16791e-18	8.96235e-17
NM_008269	8.69743	3.49943	0.539717	6.48383	8.94238e-11	1.65803e-09
NM_001190703	54.0834	3.4899	0.338676	10.3045	6.72126e-25	4.8095e-23
NM_001190704	54.0834	3.4899	0.338676	10.3045	6.72126e-25	4.8095e-23
NM_001190705	54.0834	3.4899	0.338676	10.3045	6.72126e-25	4.8095e-23
NM_010052	54.0834	3.4899	0.338676	10.3045	6.72126e-25	4.8095e-23
NR_033813	54.0834	3.4899	0.338676	10.3045	6.72126e-25	4.8095e-23
NM_001038846	518.434	3.4884	0.269685	12.9351	2.85196e-38	3.9487e-36
NM_178593	518.434	3.4884	0.269685	12.9351	2.85196e-38	3.9487e-36
NM_177756	590.542	3.48198	0.207288	16.7978	2.53249e-63	2.04337e-60
NR_045195	98.0124	3.46862	0.331705	10.457	1.36138e-25	1.05132e-23
NM_001163610	1035.04	3.4658	0.239425	14.4755	1.73034e-47	4.9376e-45
NM_009324	188.433	3.46494	0.301155	11.5055	1.23785e-30	1.22213e-28
NM_001286062	142.743	3.46311	0.225139	15.3821	2.15857e-53	8.56074e-51
NM_009640	142.743	3.46311	0.225139	15.3821	2.15857e-53	8.56074e-51
NM_001243760	41.9023	3.43775	0.380007	9.04653	1.47587e-19	6.96249e-18
NM_001302618	41.9023	3.43775	0.380007	9.04653	1.47587e-19	6.96249e-18
NM_001302619	41.9023	3.43775	0.380007	9.04653	1.47587e-19	6.96249e-18
NR_040329	32.6523	3.41355	0.426783	7.99834	1.26112e-15	3.88276e-14
NM_007877	52.3432	3.41293	0.382158	8.93068	4.23398e-19	1.90155e-17
NM_146025	91.1753	3.40957	0.277134	12.3029	8.73491e-35	1.01182e-32
NM_001256050	9.51218	3.38836	0.54442	6.22379	4.85301e-10	8.17534e-09
NM_001105561	37.0119	3.38629	0.435345	7.77842	7.34379e-15	2.11883e-13
NM_001193271	9319.08	3.38494	0.416181	8.13334	4.17637e-16	1.3405e-14
NM_010789	9319.08	3.38494	0.416181	8.13334	4.17637e-16	1.3405e-14
NM_007442	32.4885	3.3849	0.444139	7.62125	2.5123e-14	6.72601e-13
NM_001190451	35.793	3.37889	0.403628	8.37129	5.69912e-17	2.00532e-15
NM_001199151	166.615	3.37822	0.250028	13.5114	1.33952e-41	2.13221e-39
NM_001199153	166.615	3.37822	0.250028	13.5114	1.33952e-41	2.13221e-39
NM_001199154	166.615	3.37822	0.250028	13.5114	1.33952e-41	2.13221e-39
NM_026408	166.615	3.37822	0.250028	13.5114	1.33952e-41	2.13221e-39
NM_001177564	29.4861	3.37684	0.443595	7.61245	2.68949e-14	7.18736e-13
NM_001010941	9.56997	3.36484	0.538395	6.24976	4.11077e-10	6.99548e-09
NM_008189	45.2309	3.3601	0.400885	8.38172	5.21605e-17	1.84088e-15
NM_001243761	33.0236	3.35402	0.407912	8.22241	1.99447e-16	6.59161e-15
NM_008555	151.603	3.34965	0.355705	9.41693	4.64448e-21	2.46431e-19
NM_007733	62.7371	3.34925	0.348135	9.62057	6.54684e-22	3.66482e-20
NM_007833	32.4394	3.34467	0.408144	8.19481	2.50981e-16	8.21356e-15
NM_008872	230.576	3.33155	0.344751	9.66363	4.30354e-22	2.45606e-20
NM_007575	36.537	3.32155	0.390496	8.50597	1.8008e-17	6.53284e-16
NM_010195	136.345	3.31238	0.275759	12.0119	3.07766e-33	3.41299e-31
NM_023653	29.0365	3.30725	0.413024	8.00741	1.1715e-15	3.62114e-14
NM_178791	44.9724	3.30536	0.365406	9.04571	1.48694e-19	7.00059e-18
NM_198702	1449.95	3.30039	0.233815	14.1154	3.05207e-45	6.86687e-43
NM_173379	576.827	3.29714	0.188901	17.4543	3.19221e-68	3.55688e-65
NM_008783	16680.2	3.2925	0.214141	15.3754	2.39382e-53	9.33551e-51
NM_001291508	16377.7	3.29181	0.215239	15.2937	8.41781e-53	3.12648e-50
NM_001291509	16377.7	3.29181	0.215239	15.2937	8.41781e-53	3.12648e-50
NM_183355	16377.7	3.29181	0.215239	15.2937	8.41781e-53	3.12648e-50
NM_015770	22.3565	3.29024	0.472621	6.9617	3.36202e-12	7.28407e-11
NM_009573	13.5298	3.28806	0.506042	6.49761	8.16071e-11	1.52153e-09
NM_148943	272.02	3.28192	0.254674	12.8868	5.34328e-38	7.26903e-36
NR_131928	813.239	3.27506	0.231892	14.1232	2.73294e-45	6.20855e-43
NM_008988	854.384	3.27209	0.225912	14.4839	1.53151e-47	4.42416e-45
NM_177909	463.966	3.27191	0.285667	11.4536	2.25607e-30	2.20878e-28
NM_001081981	302.22	3.26536	0.322448	10.1268	4.20205e-24	2.8173e-22
NM_001297601	302.22	3.26536	0.322448	10.1268	4.20205e-24	2.8173e-22
NM_001205037	17.9989	3.24487	0.494482	6.56217	5.30313e-11	1.01214e-09
NM_001198765	16.1843	3.24188	0.486959	6.65739	2.78733e-11	5.51782e-10
NM_001198766	16.1843	3.24188	0.486959	6.65739	2.78733e-11	5.51782e-10
NM_015784	16.1843	3.24188	0.486959	6.65739	2.78733e-11	5.51782e-10
NM_007441	35.4427	3.23276	0.400321	8.07543	6.72406e-16	2.11758e-14
NM_001081982	450.568	3.23249	0.301055	10.7372	6.80842e-27	5.58983e-25
NM_010906	450.568	3.23249	0.301055	10.7372	6.80842e-27	5.58983e-25
NR_131014	60.5978	3.23202	0.327244	9.8765	5.26401e-23	3.24893e-21
NM_033269	2545.92	3.22845	0.342346	9.43038	4.086e-21	2.1814e-19
NM_007739	458.62	3.22785	0.294076	10.9762	4.97153e-28	4.26113e-26
NM_008086	133.887	3.22112	0.48523	6.63834	3.17246e-11	6.23802e-10
NM_001164268	1949.78	3.21356	0.215758	14.8943	3.59012e-50	1.12007e-47
NR_131182	25.3183	3.20846	0.446197	7.19069	6.4467e-13	1.513e-11
NM_001122737	626.49	3.2053	0.353934	9.05619	1.35083e-19	6.45062e-18
NM_010518	30.9251	3.2012	0.457071	7.00371	2.4927e-12	5.4613e-11
NM_016853	35.2906	3.19476	0.371811	8.59244	8.51385e-18	3.22878e-16
NM_177634	27.148	3.19276	0.45512	7.01522	2.29594e-12	5.06848e-11
NM_001040087	68.4686	3.18462	0.309195	10.2997	7.06598e-25	4.99507e-23
NM_001040088	68.4686	3.18462	0.309195	10.2997	7.06598e-25	4.99507e-23
NM_001289585	68.4686	3.18462	0.309195	10.2997	7.06598e-25	4.99507e-23
NM_001289586	68.4686	3.18462	0.309195	10.2997	7.06598e-25	4.99507e-23
NM_001305805	37.8547	3.1836	0.361007	8.81866	1.15833e-18	4.90121e-17
NM_133500	37.8547	3.1836	0.361007	8.81866	1.15833e-18	4.90121e-17
NM_133501	37.8547	3.1836	0.361007	8.81866	1.15833e-18	4.90121e-17
NM_001277238	9.25836	3.17305	0.540698	5.86843	4.39937e-09	6.3701e-08
NM_010456	9.25836	3.17305	0.540698	5.86843	4.39937e-09	6.3701e-08
NR_102394	33.6919	3.16807	0.403224	7.85686	3.93882e-15	1.16369e-13
NM_009177	1343.83	3.16802	0.219119	14.458	2.23133e-47	5.6751e-45
NM_001291269	49.0385	3.15981	0.326326	9.68299	3.56151e-22	2.04254e-20
NM_010132	17.7828	3.15627	0.451693	6.98766	2.79515e-12	6.1011e-11
NM_011607	1302.37	3.1538	0.536348	5.88014	4.0992e-09	5.97614e-08
NM_018884	4125.23	3.1479	0.230006	13.6862	1.22827e-42	2.19392e-40
NM_026439	178.9	3.13784	0.4804	6.53172	6.50201e-11	1.22103e-09
NM_001291268	50.7723	3.13551	0.323125	9.70371	2.90732e-22	1.67971e-20
NM_009330	50.7723	3.13551	0.323125	9.70371	2.90732e-22	1.67971e-20
NM_011377	18.1517	3.12687	0.441986	7.07459	1.49892e-12	3.34988e-11
NM_011718	33.0143	3.12557	0.449036	6.96061	3.38796e-12	7.33349e-11
NM_001033260	351.323	3.12475	0.198677	15.7278	9.75419e-56	5.07196e-53
NM_001290702	402.797	3.12404	0.302961	10.3117	6.24058e-25	4.54902e-23
NM_011856	402.797	3.12404	0.302961	10.3117	6.24058e-25	4.54902e-23
NM_177779	7.61383	3.11692	0.551674	5.64993	1.60517e-08	2.11007e-07
NM_030688	206.817	3.11482	0.248047	12.5574	3.62079e-36	4.55499e-34
NM_001033324	264.374	3.11429	0.267549	11.6401	2.57722e-31	2.62193e-29
NM_001309430	100.467	3.11113	0.311883	9.97533	1.95454e-23	1.2599e-21
NR_130973	1090.98	3.10747	0.30678	10.1293	4.09454e-24	2.76104e-22
NR_130974	1090.98	3.10747	0.30678	10.1293	4.09454e-24	2.76104e-22
NM_010462	11.7264	3.10265	0.513737	6.03937	1.54718e-09	2.39118e-08
NM_009116	154.709	3.09935	0.307888	10.0665	7.76916e-24	5.14988e-22
NM_145134	712.349	3.09913	0.24862	12.4653	1.15403e-35	1.42122e-33
NM_175501	285.691	3.09591	0.336794	9.1923	3.84514e-20	1.90216e-18
NM_008764	34.2369	3.09292	0.40207	7.69249	1.44294e-14	4.01945e-13
NM_008151	8.06345	3.08992	0.547409	5.64463	1.65537e-08	2.16754e-07
NR_131981	53.8945	3.08606	0.372906	8.27571	1.27698e-16	4.34302e-15
NR_002863	104.998	3.08565	0.371025	8.31657	9.05484e-17	3.1296e-15
NM_001001559	14.2716	3.08331	0.503236	6.12698	8.95635e-10	1.4594e-08
NM_001302153	41.4525	3.07889	0.385044	7.99621	1.28311e-15	3.94009e-14
NM_001302154	41.4525	3.07889	0.385044	7.99621	1.28311e-15	3.94009e-14
NM_001168296	711.895	3.07254	0.202975	15.1375	9.157e-52	3.15095e-49
NM_173447	711.895	3.07254	0.202975	15.1375	9.157e-52	3.15095e-49
NM_001083628	4298.79	3.07164	0.221176	13.8878	7.51436e-44	1.55601e-41
NM_007482	20.1665	3.07025	0.509326	6.02807	1.65934e-09	2.55776e-08
NM_177378	332.299	3.06917	0.233895	13.122	2.46331e-39	3.51457e-37
NM_029961	291.685	3.06402	0.337207	9.08647	1.02309e-19	4.91565e-18
NM_001291483	579.975	3.0565	0.279632	10.9305	8.24301e-28	6.98834e-26
NM_010784	579.975	3.0565	0.279632	10.9305	8.24301e-28	6.98834e-26
NR_030566	899.572	3.05607	0.267312	11.4326	2.87371e-30	2.77859e-28
NM_008259	33.9631	3.05101	0.361679	8.43567	3.29322e-17	1.17288e-15
NM_138673	34.8943	3.04821	0.406838	7.49243	6.76078e-14	1.74224e-12
NR_003965	149.67	3.04296	0.27543	11.048	2.24074e-28	1.97854e-26
NM_001012336	566.259	3.03598	0.27903	10.8805	1.42809e-27	1.20201e-25
NM_001291482	566.259	3.03598	0.27903	10.8805	1.42809e-27	1.20201e-25
NM_011356	15.0696	3.03369	0.482812	6.28337	3.31309e-10	5.67934e-09
NM_001122950	16.6533	3.02641	0.459268	6.58965	4.40871e-11	8.54676e-10
NM_028392	586.219	3.02142	0.195849	15.4273	1.07265e-53	4.40332e-51
NM_009930	194.263	3.01178	0.557699	5.40037	6.6504e-08	7.89512e-07
NM_001013833	4356.08	3.00849	0.333051	9.03313	1.6683e-19	7.79175e-18
NR_131041	25.3343	2.99608	0.447405	6.69658	2.13357e-11	4.27061e-10
NM_053171	753.237	2.99164	0.179128	16.7011	1.28684e-62	9.4096e-60
NM_001161431	15.9568	2.99145	0.471376	6.34622	2.20675e-10	3.86205e-09
NM_008270	134.159	2.9806	0.305083	9.7698	1.5175e-22	8.87698e-21
NM_198863	14.0537	2.97623	0.484585	6.1418	8.15891e-10	1.33597e-08
NM_001301333	17.7507	2.97216	0.478198	6.21532	5.12187e-10	8.585e-09
NM_010514	645.915	2.97009	0.428755	6.92724	4.29144e-12	9.21269e-11
NM_001081328	343.442	2.96708	0.25085	11.8281	2.79372e-32	2.98495e-30
NM_001301332	20.0791	2.96324	0.464271	6.38258	1.7413e-10	3.07044e-09
NM_010275	20.0791	2.96324	0.464271	6.38258	1.7413e-10	3.07044e-09
NM_172544	64.9168	2.95337	0.333777	8.84834	8.88295e-19	3.82081e-17
NM_175397	71.8594	2.95222	0.380323	7.7624	8.33368e-15	2.37515e-13
NR_131145	23.6647	2.95204	0.39755	7.42558	1.12284e-13	2.81902e-12
NM_183180	389.456	2.95062	0.33263	8.87058	7.27671e-19	3.15311e-17
NM_011037	62.0574	2.94823	0.316317	9.32051	1.15785e-20	5.99394e-19
NM_013780	2063.29	2.9467	0.425175	6.93057	4.19163e-12	9.0313e-11
NM_053106	616.764	2.94373	0.343912	8.55955	1.13307e-17	4.19505e-16
NM_001122736	660.893	2.94134	0.43208	6.80739	9.93885e-12	2.05987e-10
NM_001174086	43.825	2.93679	0.413844	7.09636	1.28081e-12	2.89283e-11
NM_028277	43.825	2.93679	0.413844	7.09636	1.28081e-12	2.89283e-11
NM_001146268	353.734	2.93396	0.28666	10.235	1.38245e-24	9.5704e-23
NM_008809	353.734	2.93396	0.28666	10.235	1.38245e-24	9.5704e-23
NM_001297593	164.01	2.93282	0.288084	10.1804	2.42475e-24	1.65897e-22
NM_001297596	164.01	2.93282	0.288084	10.1804	2.42475e-24	1.65897e-22
NM_001024617	163.145	2.92675	0.288265	10.153	3.21468e-24	2.1803e-22
NM_001297591	163.145	2.92675	0.288265	10.153	3.21468e-24	2.1803e-22
NM_177906	188.451	2.92322	0.24856	11.7606	6.22797e-32	6.56433e-30
NM_001164316	1971.61	2.90674	0.290936	9.99097	1.66936e-23	1.08806e-21
NM_183310	1971.61	2.90674	0.290936	9.99097	1.66936e-23	1.08806e-21
NM_017383	19.9094	2.89837	0.457257	6.33859	2.31875e-10	4.05202e-09
NM_001193266	94.9821	2.89458	0.281086	10.2979	7.20517e-25	5.06288e-23
NM_207010	94.9821	2.89458	0.281086	10.2979	7.20517e-25	5.06288e-23
NM_028279	100.256	2.87595	0.277676	10.3572	3.88115e-25	2.92952e-23
NM_007759	84.6517	2.8652	0.309594	9.25469	2.14858e-20	1.08819e-18
NM_022983	146.843	2.85881	0.257737	11.092	1.37239e-28	1.22101e-26
NR_045311	323.741	2.85088	0.323074	8.82424	1.10202e-18	4.68841e-17
NM_177880	77.0859	2.84824	0.302433	9.41777	4.60774e-21	2.45038e-19
NM_001039047	10.8639	2.84066	0.493745	5.75329	8.75214e-09	1.20395e-07
NM_001033793	22.5424	2.83967	0.495264	5.73364	9.82986e-09	1.33804e-07
NM_001278534	10.6587	2.835	0.50516	5.61209	1.99902e-08	2.57431e-07
NM_001198587	78.7981	2.83488	0.303113	9.35255	8.5559e-21	4.46874e-19
NM_001024719	19.1874	2.83134	0.457742	6.18545	6.1927e-10	1.0306e-08
NM_010165	139.551	2.83124	0.321341	8.81072	1.24349e-18	5.23316e-17
NM_001301357	15.9475	2.82918	0.482318	5.8658	4.4698e-09	6.44815e-08
NM_001001309	377.846	2.82776	0.275578	10.2612	1.05387e-24	7.36107e-23
NM_181588	20.5065	2.81352	0.448906	6.2675	3.66881e-10	6.26616e-09
NM_001013386	143.568	2.81228	0.307271	9.15243	5.56677e-20	2.73075e-18
NM_178594	121.873	2.8077	0.331373	8.47292	2.39307e-17	8.58825e-16
NM_009369	117.455	2.80686	0.343759	8.16521	3.20876e-16	1.03561e-14
NM_010517	213.803	2.80485	0.371589	7.54828	4.4106e-14	1.15183e-12
NM_021387	96.3764	2.79824	0.304399	9.19267	3.83193e-20	1.89965e-18
NM_011160	3838.96	2.79695	0.41258	6.77916	1.20876e-11	2.48322e-10
NM_183064	70.2274	2.78401	0.308637	9.02035	1.87488e-19	8.70443e-18
NM_001001881	647.336	2.78269	0.195222	14.254	4.23601e-46	1.0012e-43
NM_001285792	112.845	2.78076	0.305502	9.10228	8.84589e-20	4.26773e-18
NM_001285794	112.845	2.78076	0.305502	9.10228	8.84589e-20	4.26773e-18
NM_206535	37.5805	2.78075	0.379149	7.33419	2.23063e-13	5.4426e-12
NM_001305451	11.6605	2.7802	0.49818	5.58071	2.39536e-08	3.02968e-07
NM_029425	11.6605	2.7802	0.49818	5.58071	2.39536e-08	3.02968e-07
NM_001037925	8.69366	2.7787	0.545417	5.09464	3.49412e-07	3.6305e-06
NM_144783	646.3	2.7721	0.289297	9.5822	9.50023e-22	5.20599e-20
NM_001161665	711.107	2.7694	0.231482	11.9638	5.50026e-33	6.07078e-31
NM_007562	22.2317	2.76879	0.426872	6.48624	8.80049e-11	1.6356e-09
NM_001113559	356.672	2.76245	0.232266	11.8935	1.27952e-32	1.38609e-30
NM_001243163	356.672	2.76245	0.232266	11.8935	1.27952e-32	1.38609e-30
NM_011444	356.672	2.76245	0.232266	11.8935	1.27952e-32	1.38609e-30
NM_146017	56.7295	2.75607	0.370956	7.42962	1.08911e-13	2.74614e-12
NM_001271962	164.121	2.75291	0.299828	9.18163	4.2462e-20	2.09172e-18
NR_038175	598.112	2.74856	0.294565	9.33091	1.04965e-20	5.45795e-19
NM_001098528	104.006	2.74486	0.276308	9.93406	2.95956e-23	1.87671e-21
NM_001163664	53.2603	2.74413	0.358809	7.6479	2.04288e-14	5.55183e-13
NM_001163665	53.2603	2.74413	0.358809	7.6479	2.04288e-14	5.55183e-13
NM_001163666	53.2603	2.74413	0.358809	7.6479	2.04288e-14	5.55183e-13
NM_001163667	53.2603	2.74413	0.358809	7.6479	2.04288e-14	5.55183e-13
NM_001163668	53.2603	2.74413	0.358809	7.6479	2.04288e-14	5.55183e-13
NM_001163669	53.2603	2.74413	0.358809	7.6479	2.04288e-14	5.55183e-13
NM_001163670	53.2603	2.74413	0.358809	7.6479	2.04288e-14	5.55183e-13
NM_011620	53.2603	2.74413	0.358809	7.6479	2.04288e-14	5.55183e-13
NM_007937	172.378	2.74239	0.315306	8.69756	3.39108e-18	1.34946e-16
NM_011866	859.473	2.7416	0.27994	9.79351	1.20051e-22	7.12962e-21
NM_177366	163.876	2.73723	0.285564	9.58534	9.21504e-22	5.09746e-20
NM_001311085	22.0219	2.73437	0.416056	6.57213	4.96015e-11	9.52894e-10
NM_029212	21.9414	2.73333	0.416583	6.56129	5.3344e-11	1.01727e-09
NM_007625	40.8123	2.73079	0.403945	6.7603	1.3771e-11	2.80442e-10
NR_038085	11.4221	2.72159	0.512082	5.31475	1.06804e-07	1.21908e-06
NM_001145920	61.0516	2.72149	0.306612	8.876	6.93105e-19	3.03139e-17
NM_001271630	61.0516	2.72149	0.306612	8.876	6.93105e-19	3.03139e-17
NM_001271631	61.0516	2.72149	0.306612	8.876	6.93105e-19	3.03139e-17
NM_001290707	903.377	2.7195	0.273953	9.92689	3.18031e-23	2.00044e-21
NM_025696	37.5024	2.71939	0.317435	8.56677	1.06432e-17	3.97828e-16
NM_001286750	51.9468	2.71869	0.345827	7.86141	3.79828e-15	1.12501e-13
NM_153458	51.9468	2.71869	0.345827	7.86141	3.79828e-15	1.12501e-13
NM_001271963	225.477	2.71826	0.305361	8.90181	5.49435e-19	2.4257e-17
NM_001302179	79.114	2.71438	0.312763	8.6787	4.00324e-18	1.58229e-16
NM_001302183	79.114	2.71438	0.312763	8.6787	4.00324e-18	1.58229e-16
NM_133659	79.114	2.71438	0.312763	8.6787	4.00324e-18	1.58229e-16
NR_033492	241.945	2.71266	0.244089	11.1134	1.08013e-28	9.64655e-27
NR_130170	286.082	2.70884	0.245772	11.0217	3.00191e-28	2.64066e-26
NM_033652	178.355	2.7088	0.230922	11.7303	8.90912e-32	9.2241e-30
NM_010140	133.654	2.70539	0.288724	9.37017	7.24184e-21	3.83375e-19
NM_001113515	159.14	2.70386	0.316766	8.53581	1.3918e-17	5.07269e-16
NM_031163	159.14	2.70386	0.316766	8.53581	1.3918e-17	5.07269e-16
NM_001267626	408.115	2.70374	0.217239	12.4459	1.47159e-35	1.78413e-33
NM_058212	408.115	2.70374	0.217239	12.4459	1.47159e-35	1.78413e-33
NM_001267625	455.831	2.70358	0.218295	12.385	3.15109e-35	3.78115e-33
NM_001289496	144.324	2.69827	0.288493	9.35298	8.521e-21	4.46046e-19
NM_001289498	144.324	2.69827	0.288493	9.35298	8.521e-21	4.46046e-19
NM_178748	144.324	2.69827	0.288493	9.35298	8.521e-21	4.46046e-19
NM_001033281	96.1839	2.69777	0.298565	9.03577	1.62849e-19	7.62099e-18
NR_073425	67.3623	2.69336	0.297808	9.04394	1.51122e-19	7.0864e-18
NM_007426	58.4912	2.6846	0.345373	7.77304	7.66244e-15	2.20805e-13
NM_001080965	35.3354	2.68291	0.436011	6.1533	7.58886e-10	1.24524e-08
NM_001080966	35.3354	2.68291	0.436011	6.1533	7.58886e-10	1.24524e-08
NM_020572	35.3354	2.68291	0.436011	6.1533	7.58886e-10	1.24524e-08
NM_001166282	28.5945	2.68247	0.396697	6.76201	1.3609e-11	2.77626e-10
NM_001082553	49.6163	2.68235	0.318901	8.41122	4.0577e-17	1.44076e-15
NM_001312644	188.363	2.67728	0.331561	8.07478	6.75967e-16	2.12594e-14
NM_001276419	86.8585	2.67563	0.294796	9.07623	1.12401e-19	5.38949e-18
NM_001285795	98.2585	2.67367	0.309411	8.64114	5.56526e-18	2.14887e-16
NM_009519	98.2585	2.67367	0.309411	8.64114	5.56526e-18	2.14887e-16
NM_001112798	599.087	2.6723	0.165857	16.1121	2.09804e-58	1.14167e-55
NM_001286684	599.087	2.6723	0.165857	16.1121	2.09804e-58	1.14167e-55
NM_011406	599.087	2.6723	0.165857	16.1121	2.09804e-58	1.14167e-55
NR_104580	599.087	2.6723	0.165857	16.1121	2.09804e-58	1.14167e-55
NM_001127262	81.5032	2.66982	0.308051	8.66681	4.44389e-18	1.73884e-16
NM_001127264	81.5032	2.66982	0.308051	8.66681	4.44389e-18	1.73884e-16
NM_011641	81.5032	2.66982	0.308051	8.66681	4.44389e-18	1.73884e-16
NR_015387	10.1289	2.66849	0.517953	5.15201	2.57716e-07	2.73483e-06
NR_131930	740.342	2.66514	0.246552	10.8097	3.09831e-27	2.58919e-25
NM_201352	562.405	2.66387	0.294176	9.05537	1.36106e-19	6.45992e-18
NM_001040085	306.897	2.66337	0.234211	11.3717	5.78438e-30	5.43569e-28
NM_001289583	306.897	2.66337	0.234211	11.3717	5.78438e-30	5.43569e-28
NM_001289584	306.897	2.66337	0.234211	11.3717	5.78438e-30	5.43569e-28
NM_031394	306.897	2.66337	0.234211	11.3717	5.78438e-30	5.43569e-28
NR_131931	708.945	2.65796	0.242316	10.969	5.38687e-28	4.60027e-26
NM_175432	1117.02	2.65567	0.19318	13.7471	5.3014e-43	1.01978e-40
NR_002855	36.6456	2.6545	0.342321	7.75442	8.87447e-15	2.51702e-13
NR_045935	36.8865	2.65302	0.369136	7.1871	6.6184e-13	1.54864e-11
NM_007742	191.924	2.64952	0.47	5.63729	1.7275e-08	2.25317e-07
NM_001081433	3416.13	2.64786	0.276021	9.59295	8.56006e-22	4.74637e-20
NR_040701	12.7365	2.64572	0.500604	5.28506	1.25665e-07	1.4164e-06
NM_001243792	261.806	2.64085	0.26386	10.0085	1.39788e-23	9.1622e-22
NM_001081281	10.1535	2.63852	0.506314	5.21124	1.87587e-07	2.05397e-06
NM_007400	374.575	2.63315	0.338183	7.78618	6.90636e-15	1.99509e-13
NM_001127263	66.9186	2.6319	0.328869	8.00288	1.21538e-15	3.74687e-14
NM_001127265	66.9186	2.6319	0.328869	8.00288	1.21538e-15	3.74687e-14
NM_001039173	264.75	2.6286	0.191214	13.7469	5.31704e-43	1.01978e-40
NM_001271472	328.765	2.62431	0.217874	12.0451	2.05911e-33	2.30532e-31
NM_001271473	328.765	2.62431	0.217874	12.0451	2.05911e-33	2.30532e-31
NM_022723	328.765	2.62431	0.217874	12.0451	2.05911e-33	2.30532e-31
NM_177161	47.2251	2.62257	0.32533	8.06126	7.55109e-16	2.35534e-14
NM_001310666	8367.34	2.62154	0.187149	14.0077	1.39771e-44	3.08539e-42
NM_183208	8367.34	2.62154	0.187149	14.0077	1.39771e-44	3.08539e-42
NM_009522	109.754	2.62076	0.283523	9.24358	2.38391e-20	1.19702e-18
NM_172506	604.856	2.61056	0.220557	11.8362	2.53697e-32	2.72305e-30
NM_001009819	22.5077	2.61052	0.418185	6.2425	4.30635e-10	7.29119e-09
NM_001112813	216.924	2.61026	0.272796	9.56852	1.08452e-21	5.87423e-20
NM_001177888	216.924	2.61026	0.272796	9.56852	1.08452e-21	5.87423e-20
NM_001177890	216.924	2.61026	0.272796	9.56852	1.08452e-21	5.87423e-20
NM_009783	216.924	2.61026	0.272796	9.56852	1.08452e-21	5.87423e-20
NM_001276420	19.0791	2.60989	0.455018	5.73581	9.70486e-09	1.32256e-07
NM_001034013	550.115	2.60862	0.33373	7.81655	5.42913e-15	1.57613e-13
NM_001163730	8.00063	2.60514	0.551153	4.72671	2.28191e-06	2.02558e-05
NM_001253822	10.1797	2.60037	0.525832	4.94524	7.60499e-07	7.40221e-06
NM_008393	10.1797	2.60037	0.525832	4.94524	7.60499e-07	7.40221e-06
NM_177802	19.4929	2.60032	0.425906	6.10537	1.02562e-09	1.65735e-08
NR_045402	98.3551	2.59486	0.320079	8.10694	5.19116e-16	1.65488e-14
NR_035479	25.2424	2.59317	0.418317	6.19907	5.67993e-10	9.47965e-09
NM_012028	132.339	2.5904	0.280455	9.23641	2.54904e-20	1.27446e-18
NM_139226	8.83347	2.58577	0.525381	4.92171	8.57927e-07	8.30904e-06
NR_015385	9.6713	2.57954	0.518442	4.97556	6.50577e-07	6.40962e-06
NR_015386	9.6713	2.57954	0.518442	4.97556	6.50577e-07	6.40962e-06
NR_038082	9.6713	2.57954	0.518442	4.97556	6.50577e-07	6.40962e-06
NR_038083	9.6713	2.57954	0.518442	4.97556	6.50577e-07	6.40962e-06
NR_038084	9.6713	2.57954	0.518442	4.97556	6.50577e-07	6.40962e-06
NR_038086	9.6713	2.57954	0.518442	4.97556	6.50577e-07	6.40962e-06
NM_001302798	42.4988	2.57719	0.336567	7.65728	1.89905e-14	5.20936e-13
NM_001302799	42.4988	2.57719	0.336567	7.65728	1.89905e-14	5.20936e-13
NM_030554	42.4988	2.57719	0.336567	7.65728	1.89905e-14	5.20936e-13
NM_175549	1115.06	2.57355	0.491945	5.23139	1.68243e-07	1.85781e-06
NM_007938	408.4	2.56472	0.219416	11.6888	1.45421e-31	1.49241e-29
NM_001081291	43.3389	2.56222	0.34034	7.52844	5.1352e-14	1.33213e-12
NM_001101483	78.597	2.56161	0.302481	8.46864	2.48272e-17	8.89635e-16
NR_002849	13.5257	2.56126	0.494222	5.1824	2.19044e-07	2.35868e-06
NM_001159558	21.8296	2.55476	0.399388	6.39667	1.58801e-10	2.81499e-09
NM_001276250	18.1076	2.55316	0.446785	5.71451	1.10019e-08	1.48291e-07
NM_001286101	139.287	2.55287	0.329642	7.74438	9.60476e-15	2.71427e-13
NM_178658	139.287	2.55287	0.329642	7.74438	9.60476e-15	2.71427e-13
NM_008904	18.2811	2.54657	0.436475	5.83441	5.39818e-09	7.65991e-08
NR_027710	18.2811	2.54657	0.436475	5.83441	5.39818e-09	7.65991e-08
NM_013526	28.1543	2.54464	0.385522	6.60051	4.09754e-11	7.97656e-10
NM_029679	152.086	2.54236	0.314433	8.08554	6.1889e-16	1.96225e-14
NM_010942	79.5868	2.53969	0.30906	8.21748	2.07823e-16	6.85876e-15
NM_001081347	178.49	2.5389	0.295553	8.59031	8.67353e-18	3.28401e-16
NM_001252636	178.657	2.53764	0.296351	8.56293	1.10031e-17	4.09318e-16
NM_001252637	178.243	2.5368	0.29593	8.57229	1.01448e-17	3.80428e-16
NM_001252638	178.243	2.5368	0.29593	8.57229	1.01448e-17	3.80428e-16
NM_001276248	18.0218	2.53659	0.447974	5.66235	1.49315e-08	1.9728e-07
NM_001033223	83.7325	2.53532	0.263066	9.63758	5.5483e-22	3.12078e-20
NM_001039354	83.7325	2.53532	0.263066	9.63758	5.5483e-22	3.12078e-20
NM_001284329	83.4307	2.53255	0.262965	9.63077	5.92816e-22	3.32645e-20
NM_001286100	182.718	2.53027	0.289218	8.74866	2.15896e-18	8.94116e-17
NM_025817	17.6448	2.52948	0.470727	5.37355	7.72011e-08	9.05025e-07
NM_001110202	25.5976	2.52795	0.433563	5.83063	5.52186e-09	7.80701e-08
NM_001286387	25.5976	2.52795	0.433563	5.83063	5.52186e-09	7.80701e-08
NM_001286388	25.5976	2.52795	0.433563	5.83063	5.52186e-09	7.80701e-08
NM_053167	25.5976	2.52795	0.433563	5.83063	5.52186e-09	7.80701e-08
NM_007392	2060.52	2.5261	0.544843	4.63639	3.54541e-06	3.01012e-05
NM_001164401	31.9792	2.52097	0.370448	6.80519	1.00919e-11	2.0879e-10
NM_011216	31.9792	2.52097	0.370448	6.80519	1.00919e-11	2.0879e-10
NM_177657	77.0767	2.51658	0.333188	7.55305	4.2518e-14	1.11284e-12
NM_130448	129.037	2.51341	0.268582	9.35807	8.12096e-21	4.27978e-19
NR_110348	233.019	2.51277	0.237755	10.5687	4.16132e-26	3.3007e-24
NM_010280	34.344	2.50701	0.372107	6.73732	1.6133e-11	3.25428e-10
NM_001302152	105.048	2.5052	0.285433	8.77684	1.68128e-18	7.05025e-17
NM_001136061	26.2735	2.50263	0.406145	6.16191	7.18709e-10	1.18849e-08
NM_001290661	246.365	2.50177	0.195396	12.8036	1.56486e-37	2.05659e-35
NM_001290664	246.365	2.50177	0.195396	12.8036	1.56486e-37	2.05659e-35
NM_024474	159.692	2.49836	0.327189	7.63582	2.2438e-14	6.04173e-13
NM_001276296	26.1877	2.49745	0.405597	6.15747	7.39148e-10	1.21627e-08
NM_007904	26.1877	2.49745	0.405597	6.15747	7.39148e-10	1.21627e-08
NM_172604	86.8754	2.4954	0.322668	7.73364	1.04514e-14	2.94288e-13
NM_177469	11.4811	2.49339	0.517761	4.81572	1.46671e-06	1.35866e-05
NM_029999	137.238	2.49329	0.28525	8.7407	2.31663e-18	9.52668e-17
NM_021389	2333.35	2.48903	0.222468	11.1882	4.65653e-29	4.20688e-27
NR_110969	2333.35	2.48903	0.222468	11.1882	4.65653e-29	4.20688e-27
NR_110970	2333.35	2.48903	0.222468	11.1882	4.65653e-29	4.20688e-27
NR_110446	35.8317	2.4876	0.389477	6.38702	1.69153e-10	2.98718e-09
NR_029460	10.3079	2.48684	0.516605	4.81382	1.48074e-06	1.37002e-05
NM_001177980	142.395	2.48479	0.292922	8.48275	2.19929e-17	7.90495e-16
NR_110445	45.3425	2.47726	0.345334	7.1735	7.31023e-13	1.69863e-11
NM_198612	364.753	2.47518	0.289675	8.54467	1.289e-17	4.72747e-16
NR_033547	23.3524	2.47411	0.441973	5.59787	2.17002e-08	2.77032e-07
NM_001135727	3051.92	2.4731	0.219785	11.2523	2.2551e-29	2.06929e-27
NM_001081009	1211.79	2.47103	0.286704	8.61873	6.77002e-18	2.59691e-16
NM_007384	521.565	2.47092	0.439139	5.62674	1.83645e-08	2.37936e-07
NM_001204252	11.3083	2.46517	0.511106	4.82322	1.41262e-06	1.31218e-05
NM_010796	11.3083	2.46517	0.511106	4.82322	1.41262e-06	1.31218e-05
NM_201518	893.618	2.45456	0.226535	10.8352	2.34369e-27	1.96559e-25
NR_105023	10.414	2.45273	0.520775	4.70976	2.48008e-06	2.18904e-05
NM_001289497	98.4463	2.4486	0.340747	7.18597	6.67307e-13	1.55832e-11
NM_177834	98.4463	2.4486	0.340747	7.18597	6.67307e-13	1.55832e-11
NM_145839	779.317	2.44824	0.19278	12.6997	5.93729e-37	7.63334e-35
NM_181318	779.317	2.44824	0.19278	12.6997	5.93729e-37	7.63334e-35
NR_001583	18.2736	2.44792	0.459912	5.32258	1.02308e-07	1.17349e-06
NM_001081072	13.3858	2.44668	0.482109	5.07495	3.87593e-07	3.99176e-06
NM_001009549	21.8952	2.44453	0.455013	5.37243	7.7681e-08	9.09739e-07
NM_001190911	373.014	2.44405	0.295085	8.28252	1.20591e-16	4.10728e-15
NM_001190912	373.014	2.44405	0.295085	8.28252	1.20591e-16	4.10728e-15
NM_001190914	373.014	2.44405	0.295085	8.28252	1.20591e-16	4.10728e-15
NM_026324	373.014	2.44405	0.295085	8.28252	1.20591e-16	4.10728e-15
NM_001190913	370.176	2.44114	0.295616	8.25779	1.4839e-16	4.9816e-15
NM_023476	172.599	2.43915	0.328461	7.426	1.11929e-13	2.81314e-12
NM_001291903	36.6644	2.43652	0.33727	7.22425	5.03865e-13	1.1909e-11
NM_009623	36.6644	2.43652	0.33727	7.22425	5.03865e-13	1.1909e-11
NM_018766	9.04078	2.43542	0.570104	4.27189	1.93823e-05	0.000141506
NM_001098203	18.5903	2.43324	0.450025	5.40691	6.41207e-08	7.62766e-07
NR_015462	163.586	2.43152	0.274283	8.865	7.65044e-19	3.30282e-17
NM_172822	50.9759	2.43059	0.369256	6.5824	4.6292e-11	8.95196e-10
NM_001168333	171.416	2.42759	0.328733	7.38467	1.52826e-13	3.79213e-12
NM_008987	9.44429	2.42537	0.525319	4.61695	3.89424e-06	3.27304e-05
NM_198858	33.6932	2.41961	0.405893	5.9612	2.50399e-09	3.78006e-08
NM_001135728	1115.94	2.4181	0.212979	11.3537	7.10924e-30	6.65397e-28
NM_031397	1210.83	2.40983	0.155619	15.4854	4.35033e-54	1.92063e-51
NM_001033415	34.1246	2.4037	0.435155	5.52377	3.31803e-08	4.12e-07
NM_019840	267.602	2.40338	0.233568	10.2898	7.83035e-25	5.4857e-23
NM_001111275	240.619	2.40318	0.380227	6.32038	2.60927e-10	4.52924e-09
NM_010512	240.619	2.40318	0.380227	6.32038	2.60927e-10	4.52924e-09
NM_001252292	1090.55	2.40195	0.265242	9.05568	1.35726e-19	6.45497e-18
NM_008590	1090.55	2.40195	0.265242	9.05568	1.35726e-19	6.45497e-18
NM_011921	14.3581	2.40191	0.468111	5.13106	2.8811e-07	3.03671e-06
NM_001252293	1092.35	2.40077	0.265424	9.045	1.49661e-19	7.03198e-18
NM_001032413	42.6018	2.39324	0.395745	6.04744	1.47169e-09	2.2866e-08
NM_001032414	42.6018	2.39324	0.395745	6.04744	1.47169e-09	2.2866e-08
NM_001289600	42.6018	2.39324	0.395745	6.04744	1.47169e-09	2.2866e-08
NM_001289601	42.6018	2.39324	0.395745	6.04744	1.47169e-09	2.2866e-08
NM_028460	42.6018	2.39324	0.395745	6.04744	1.47169e-09	2.2866e-08
NM_152799	42.6018	2.39324	0.395745	6.04744	1.47169e-09	2.2866e-08
NM_029035	3264.5	2.39222	0.236741	10.1048	5.25907e-24	3.5059e-22
NM_007786	48.6144	2.38852	0.33693	7.08908	1.35009e-12	3.02883e-11
NM_013518	41.0587	2.38823	0.34092	7.00524	2.46566e-12	5.41728e-11
NM_001142734	12.9063	2.38613	0.501251	4.76035	1.9326e-06	1.74666e-05
NM_001110203	22.3761	2.3844	0.442745	5.3855	7.22445e-08	8.529e-07
NM_001286386	22.3761	2.3844	0.442745	5.3855	7.22445e-08	8.529e-07
NM_177092	1313.55	2.38322	0.311695	7.64602	2.07293e-14	5.60747e-13
NM_001033217	3404.59	2.38011	0.433949	5.48476	4.14028e-08	5.08015e-07
NM_001083316	86.5814	2.37632	0.247245	9.61123	7.16887e-22	3.98443e-20
NM_020002	405.292	2.36815	0.283022	8.36736	5.89228e-17	2.06707e-15
NM_011058	87.9386	2.36814	0.246207	9.61848	6.68106e-22	3.73103e-20
NM_001131021	81.1151	2.36807	0.333188	7.10731	1.1833e-12	2.68294e-11
NM_008937	160.536	2.36265	0.333663	7.08095	1.43173e-12	3.20279e-11
NR_033627	9.11506	2.36194	0.538041	4.3899	1.13403e-05	8.70005e-05
NM_001013813	415.097	2.35926	0.323433	7.29443	2.99932e-13	7.26511e-12
NM_021896	26.4014	2.35926	0.453905	5.19769	2.01781e-07	2.19705e-06
NM_030194	35.3456	2.35901	0.406529	5.8028	6.52173e-09	9.11601e-08
NR_027773	4767.87	2.35661	0.438821	5.37032	7.85954e-08	9.19527e-07
NR_027772	4730.15	2.35594	0.4396	5.35928	8.35534e-08	9.73795e-07
NM_026656	40.8847	2.35585	0.368324	6.39612	1.5938e-10	2.82311e-09
NM_008495	471.837	2.35422	0.243818	9.65564	4.65241e-22	2.63588e-20
NM_172444	658.294	2.35382	0.228319	10.3093	6.39347e-25	4.64599e-23
NM_213614	27.4848	2.35216	0.420189	5.59786	2.17018e-08	2.77032e-07
NM_001005846	40.6715	2.35193	0.366987	6.40874	1.46722e-10	2.60878e-09
NM_001080381	113.619	2.35156	0.345574	6.80481	1.01185e-11	2.09155e-10
NM_001113399	547.389	2.35135	0.264919	8.87572	6.9483e-19	3.03327e-17
NM_145158	52.8658	2.34968	0.366457	6.41189	1.43725e-10	2.55743e-09
NM_001127259	92.043	2.34594	0.26227	8.94473	3.72872e-19	1.70075e-17
NM_001127260	92.043	2.34594	0.26227	8.94473	3.72872e-19	1.70075e-17
NM_029774	175.947	2.3448	0.263922	8.88444	6.42409e-19	2.82551e-17
NM_001111274	232.271	2.34303	0.381716	6.13815	8.34874e-10	1.36419e-08
NM_001111276	232.271	2.34303	0.381716	6.13815	8.34874e-10	1.36419e-08
NM_020510	158.681	2.34103	0.363903	6.43313	1.25006e-10	2.25869e-09
NR_002853	4425.32	2.34007	0.43803	5.34227	9.17901e-08	1.06221e-06
NR_027784	4425.32	2.34007	0.43803	5.34227	9.17901e-08	1.06221e-06
NM_184052	191.056	2.33826	0.387772	6.03	1.63957e-09	2.53063e-08
NM_001289921	12.3946	2.33439	0.486784	4.79553	1.62247e-06	1.48705e-05
NM_146095	12.3946	2.33439	0.486784	4.79553	1.62247e-06	1.48705e-05
NM_001110337	1151.96	2.33384	0.263801	8.84697	8.9924e-19	3.84668e-17
NM_008882	1762.28	2.33153	0.201214	11.5873	4.77721e-31	4.777e-29
NR_015560	67.8689	2.3284	0.297557	7.82505	5.07464e-15	1.47505e-13
NM_181277	134.825	2.32766	0.336802	6.91107	4.81017e-12	1.02882e-10
NM_198409	69.2365	2.32294	0.304525	7.62808	2.38278e-14	6.40858e-13
NM_011254	1257.62	2.32273	0.179734	12.9232	3.33079e-38	4.58454e-36
NM_001110338	858.173	2.32055	0.259703	8.9354	4.05719e-19	1.82917e-17
NM_147217	849.781	2.32055	0.259492	8.94266	3.79913e-19	1.72949e-17
NR_030721	25.4794	2.31852	0.378882	6.11938	9.39385e-10	1.5275e-08
NM_007752	14.9501	2.3185	0.46652	4.96978	6.70297e-07	6.57898e-06
NM_001103367	69.5509	2.30685	0.302589	7.6237	2.46515e-14	6.61491e-13
NM_026743	26.5538	2.30649	0.365289	6.31416	2.71632e-10	4.69418e-09
NM_194464	31.7984	2.3043	0.400356	5.75562	8.6323e-09	1.18886e-07
NM_001252074	28.9085	2.30162	0.385983	5.96301	2.47626e-09	3.74061e-08
NM_198166	23.9715	2.2982	0.480241	4.78551	1.70552e-06	1.55706e-05
NM_010430	19.728	2.29461	0.433249	5.29628	1.18188e-07	1.33921e-06
NM_008626	869.937	2.29395	0.234374	9.78758	1.27306e-22	7.54134e-21
NR_045094	152.579	2.29185	0.505318	4.53547	5.74762e-06	4.6665e-05
NM_007737	383.557	2.28307	0.216638	10.5386	5.73166e-26	4.4705e-24
NM_011581	84.4856	2.28006	0.324623	7.02371	2.16051e-12	4.78728e-11
NM_009994	98.38	2.28003	0.283642	8.03842	9.10047e-16	2.82791e-14
NM_013494	893.932	2.27982	0.253083	9.00821	2.09456e-19	9.70507e-18
NM_177740	820.899	2.27954	0.193185	11.7998	3.9144e-32	4.14448e-30
NM_144810	29.3107	2.2778	0.374163	6.08771	1.14539e-09	1.82443e-08
NM_001285927	130.615	2.2768	0.354454	6.4234	1.33263e-10	2.39127e-09
NM_001113400	175.331	2.27261	0.245748	9.24773	2.29315e-20	1.15392e-18
NM_053169	279.374	2.27232	0.196856	11.5431	8.00136e-31	7.96697e-29
NM_009368	40.9259	2.27147	0.342937	6.62358	3.50613e-11	6.86527e-10
NM_175366	82.056	2.27009	0.339097	6.69451	2.16396e-11	4.32774e-10
NM_001289464	11.6027	2.26477	0.476815	4.7498	2.03623e-06	1.8314e-05
NM_001289465	11.6027	2.26477	0.476815	4.7498	2.03623e-06	1.8314e-05
NM_001289466	11.6027	2.26477	0.476815	4.7498	2.03623e-06	1.8314e-05
NM_001289467	11.6027	2.26477	0.476815	4.7498	2.03623e-06	1.8314e-05
NM_011441	11.6027	2.26477	0.476815	4.7498	2.03623e-06	1.8314e-05
NM_001127261	77.4584	2.26356	0.275566	8.21422	2.13555e-16	7.03798e-15
NM_001002896	14.6206	2.25973	0.435332	5.19083	2.09363e-07	2.26486e-06
NM_010712	16.3501	2.25785	0.482835	4.67624	2.92183e-06	2.53873e-05
NM_009417	116.397	2.25648	0.310911	7.25764	3.93914e-13	9.39572e-12
NM_009526	273.906	2.2551	0.524883	4.29639	1.73604e-05	0.000128063
NR_015388	16.0007	2.2507	0.465605	4.83392	1.33868e-06	1.24995e-05
NM_001081425	43.1977	2.24145	0.325119	6.89423	5.41577e-12	1.15413e-10
NM_029861	51.1034	2.23904	0.311389	7.19049	6.45586e-13	1.51363e-11
NM_007702	104.565	2.23809	0.298357	7.50139	6.3147e-14	1.63449e-12
NM_010725	262.934	2.23725	0.281559	7.94595	1.9271e-15	5.86375e-14
NM_011935	83.1844	2.23379	0.296638	7.53038	5.05929e-14	1.3139e-12
NM_001136056	677.461	2.23322	0.249735	8.94234	3.8103e-19	1.73121e-17
NM_027219	354.876	2.23129	0.445034	5.01376	5.33753e-07	5.36251e-06
NM_016673	677.73	2.23109	0.249384	8.94641	3.67222e-19	1.68153e-17
NM_054042	29.5997	2.22623	0.450965	4.93659	7.95022e-07	7.72859e-06
NM_011658	26.2394	2.22489	0.363823	6.11529	9.63815e-10	1.56504e-08
NM_133918	75.118	2.22255	0.352399	6.30693	2.84625e-10	4.90784e-09
NM_001290335	107.28	2.22196	0.276243	8.04348	8.73195e-16	2.71701e-14
NM_009655	817.497	2.22176	0.283106	7.84781	4.23366e-15	1.23984e-13
NM_010146	780.442	2.21965	0.212141	10.4631	1.27673e-25	9.89215e-24
NM_178249	14.3172	2.21862	0.461531	4.80708	1.53153e-06	1.41317e-05
NM_030137	107.095	2.2117	0.361998	6.10971	9.98147e-10	1.61743e-08
NM_011537	10.3748	2.20891	0.519191	4.25452	2.095e-05	0.000151533
NM_011146	15.176	2.20761	0.456406	4.83694	1.31854e-06	1.23213e-05
NM_001177983	122.769	2.20628	0.255382	8.63913	5.66429e-18	2.1835e-16
NM_010199	118.511	2.20409	0.260766	8.45235	2.855e-17	1.01836e-15
NM_001159544	311.553	2.20403	0.302067	7.2965	2.95357e-13	7.16171e-12
NM_010237	311.553	2.20403	0.302067	7.2965	2.95357e-13	7.16171e-12
NM_148949	38.1682	2.20271	0.387344	5.68671	1.29511e-08	1.7297e-07
NM_023543	158.15	2.19576	0.303674	7.23065	4.80675e-13	1.13839e-11
NM_015743	22.1565	2.1955	0.423119	5.18885	2.11593e-07	2.28581e-06
NM_009946	23.0776	2.18858	0.40851	5.35747	8.43975e-08	9.80545e-07
NM_007873	32.068	2.18857	0.401647	5.449	5.06551e-08	6.1573e-07
NM_001289470	99.76	2.1845	0.289586	7.54355	4.57363e-14	1.19174e-12
NM_013489	99.76	2.1845	0.289586	7.54355	4.57363e-14	1.19174e-12
NM_009922	144.616	2.18249	0.373534	5.8428	5.13297e-09	7.31019e-08
NM_053185	415.962	2.18187	0.350324	6.22816	4.71948e-10	7.96187e-09
NM_001077514	43.6813	2.1816	0.302393	7.21447	5.41457e-13	1.27846e-11
NM_001077515	26.3969	2.18101	0.381327	5.71952	1.06826e-08	1.44319e-07
NM_178723	861.233	2.17894	0.254468	8.56272	1.1024e-17	4.09444e-16
NM_177750	13.974	2.17883	0.44978	4.84422	1.27111e-06	1.19353e-05
NM_201367	26.3073	2.17279	0.395564	5.49289	3.95407e-08	4.86442e-07
NM_178749	436.914	2.17247	0.226714	9.58243	9.47883e-22	5.20599e-20
NR_121629	72.284	2.17137	0.272154	7.97846	1.48166e-15	4.54384e-14
NM_001311134	177.728	2.16999	0.305844	7.09508	1.29272e-12	2.9057e-11
NM_001164035	137.372	2.16912	0.298322	7.27104	3.56723e-13	8.56098e-12
NM_176922	70.3024	2.16859	0.408384	5.31017	1.09522e-07	1.24706e-06
NM_008592	16.5141	2.16846	0.43205	5.01901	5.19378e-07	5.22707e-06
NR_045954	43.9813	2.16812	0.351205	6.17339	6.68412e-10	1.11002e-08
NM_029357	282.348	2.16712	0.278201	7.78977	6.71319e-15	1.94168e-13
NM_021382	111.472	2.16664	0.279877	7.74142	9.8312e-15	2.77491e-13
NM_001311133	200.951	2.16585	0.291239	7.43669	1.03241e-13	2.60878e-12
NM_001290731	12.4015	2.16356	0.481426	4.49407	6.98757e-06	5.57267e-05
NM_017464	578.869	2.15513	0.251711	8.56193	1.10993e-17	4.11589e-16
NM_001012324	34.3474	2.15397	0.362982	5.9341	2.9547e-09	4.4177e-08
NM_001113414	87.8826	2.15277	0.362615	5.9368	2.90639e-09	4.35103e-08
NM_001113415	87.8826	2.15277	0.362615	5.9368	2.90639e-09	4.35103e-08
NM_010096	87.8826	2.15277	0.362615	5.9368	2.90639e-09	4.35103e-08
NM_011211	1777.29	2.15259	0.185027	11.6339	2.77206e-31	2.80794e-29
NM_175485	7752.46	2.15247	0.333709	6.45015	1.11741e-10	2.03473e-09
NM_007993	679.475	2.15207	0.241242	8.92083	4.62817e-19	2.05883e-17
NM_029430	76.2744	2.15034	0.306977	7.0049	2.47169e-12	5.42543e-11
NM_029568	15.1859	2.14892	0.479901	4.47785	7.53973e-06	5.96315e-05
NM_001277286	40.2698	2.14862	0.317998	6.75671	1.41165e-11	2.85737e-10
NM_001277289	40.2698	2.14862	0.317998	6.75671	1.41165e-11	2.85737e-10
NM_031158	40.2698	2.14862	0.317998	6.75671	1.41165e-11	2.85737e-10
NR_102385	40.2698	2.14862	0.317998	6.75671	1.41165e-11	2.85737e-10
NR_102386	40.2698	2.14862	0.317998	6.75671	1.41165e-11	2.85737e-10
NM_013926	10.2208	2.14857	0.492885	4.35918	1.30551e-05	9.92448e-05
NM_144557	425.158	2.14745	0.166287	12.9141	3.74616e-38	5.12611e-36
NM_001164034	143.029	2.14569	0.295179	7.26913	3.61797e-13	8.66498e-12
NM_008742	143.029	2.14569	0.295179	7.26913	3.61797e-13	8.66498e-12
NM_031376	46.41	2.14465	0.337334	6.35764	2.04874e-10	3.5909e-09
NM_001081397	97.4655	2.13737	0.249734	8.55859	1.14253e-17	4.21007e-16
NM_001204276	641.889	2.1313	0.326068	6.53635	6.30392e-11	1.1886e-09
NM_001204277	641.889	2.1313	0.326068	6.53635	6.30392e-11	1.1886e-09
NM_019572	641.889	2.1313	0.326068	6.53635	6.30392e-11	1.1886e-09
NM_025833	1632.65	2.1307	0.238361	8.93895	3.92901e-19	1.77481e-17
NM_001145965	1328.1	2.13069	0.217955	9.77582	1.4299e-22	8.40661e-21
NM_172910	1328.1	2.13069	0.217955	9.77582	1.4299e-22	8.40661e-21
NM_199366	10.7979	2.12897	0.50791	4.19162	2.76964e-05	0.000194908
NM_001204275	642.399	2.12788	0.325724	6.53275	6.45716e-11	1.21358e-09
NM_001204278	642.399	2.12788	0.325724	6.53275	6.45716e-11	1.21358e-09
NM_001204279	642.399	2.12788	0.325724	6.53275	6.45716e-11	1.21358e-09
NM_001204280	642.399	2.12788	0.325724	6.53275	6.45716e-11	1.21358e-09
NM_009238	562.766	2.12736	0.25493	8.34486	7.1298e-17	2.47156e-15
NM_001285457	366.811	2.12697	0.254787	8.34802	6.94169e-17	2.4135e-15
NM_010279	366.811	2.12697	0.254787	8.34802	6.94169e-17	2.4135e-15
NR_104342	366.811	2.12697	0.254787	8.34802	6.94169e-17	2.4135e-15
NM_001289550	224.793	2.1253	0.336469	6.31648	2.67588e-10	4.62771e-09
NM_001289551	224.793	2.1253	0.336469	6.31648	2.67588e-10	4.62771e-09
NM_001289552	224.793	2.1253	0.336469	6.31648	2.67588e-10	4.62771e-09
NM_001289553	224.793	2.1253	0.336469	6.31648	2.67588e-10	4.62771e-09
NM_175162	3543.2	2.12524	0.247089	8.60111	7.89455e-18	2.99878e-16
NM_177919	34.7826	2.12413	0.376071	5.6482	1.62133e-08	2.13012e-07
NM_001290730	11.7797	2.12043	0.482847	4.39152	1.12563e-05	8.63844e-05
NM_008276	11.7797	2.12043	0.482847	4.39152	1.12563e-05	8.63844e-05
NM_021566	552.734	2.11704	0.443554	4.77291	1.81579e-06	1.65103e-05
NM_015795	468.565	2.11566	0.206347	10.2529	1.14829e-24	7.99666e-23
NM_001099299	73.7431	2.11485	0.338768	6.24277	4.29899e-10	7.28401e-09
NM_009608	14.7986	2.11419	0.525808	4.02084	5.79898e-05	0.000379553
NM_001111324	594.421	2.11175	0.258021	8.18442	2.73615e-16	8.88797e-15
NM_010250	41.7501	2.11007	0.372097	5.67076	1.42168e-08	1.88262e-07
NM_001081098	767.466	2.10975	0.241343	8.74172	2.2959e-18	9.45806e-17
NM_001205076	552.892	2.10963	0.444455	4.74656	2.06907e-06	1.85994e-05
NM_007743	158.992	2.10961	0.505135	4.17633	2.96245e-05	0.000207354
NM_013905	6.91651	2.10915	0.565864	3.7273	0.000193542	0.00108967
NM_001164111	344.797	2.10912	0.230503	9.1501	5.68806e-20	2.7786e-18
NM_001164112	344.797	2.10912	0.230503	9.1501	5.68806e-20	2.7786e-18
NR_038184	65.6296	2.10702	0.304922	6.91003	4.8456e-12	1.03451e-10
NR_038185	65.6296	2.10702	0.304922	6.91003	4.8456e-12	1.03451e-10
NM_001040426	3273.52	2.10404	0.253065	8.31422	9.23591e-17	3.18748e-15
NM_028275	295.379	2.09952	0.272255	7.71161	1.24239e-14	3.47321e-13
NM_001163144	995.836	2.09915	0.210537	9.97045	2.0529e-23	1.31605e-21
NM_008396	32.0445	2.09761	0.332037	6.31739	2.66016e-10	4.61416e-09
NM_173007	714.627	2.09487	0.158966	13.1781	1.17318e-39	1.7265e-37
NM_153527	20.6686	2.08965	0.402759	5.18835	2.12163e-07	2.29091e-06
NM_177387	1601.08	2.0881	0.27179	7.68278	1.55679e-14	4.31092e-13
NM_001167925	13.2942	2.08696	0.450764	4.62982	3.65976e-06	3.09374e-05
NM_173759	13.2942	2.08696	0.450764	4.62982	3.65976e-06	3.09374e-05
NR_033764	13.2942	2.08696	0.450764	4.62982	3.65976e-06	3.09374e-05
NR_033765	13.2942	2.08696	0.450764	4.62982	3.65976e-06	3.09374e-05
NM_011741	37.7153	2.08646	0.35552	5.86875	4.39093e-09	6.3701e-08
NM_001304757	631.385	2.08509	0.235679	8.84718	8.97617e-19	3.84668e-17
NM_007731	631.385	2.08509	0.235679	8.84718	8.97617e-19	3.84668e-17
NM_010110	227.523	2.08365	0.196702	10.5929	3.21411e-26	2.55806e-24
NM_011395	24.2135	2.08168	0.394551	5.27607	1.31982e-07	1.48545e-06
NM_174857	91.3089	2.0793	0.324863	6.40055	1.54816e-10	2.74852e-09
NM_177082	42.1686	2.0784	0.346613	5.9963	2.01867e-09	3.06919e-08
NM_198962	10.2074	2.07808	0.491816	4.22532	2.38602e-05	0.000170371
NM_008289	11.6773	2.0761	0.486057	4.27131	1.94332e-05	0.000141789
NM_024208	136.295	2.07492	0.256985	8.0741	6.79782e-16	2.13506e-14
NR_028280	55.2946	2.06862	0.287786	7.18805	6.57253e-13	1.53945e-11
NM_175291	259.416	2.0669	0.362759	5.69771	1.21428e-08	1.62639e-07
NM_026122	528.913	2.06541	0.215512	9.58377	9.35669e-22	5.15146e-20
NM_175074	528.913	2.06541	0.215512	9.58377	9.35669e-22	5.15146e-20
NM_010441	3846.83	2.06486	0.305154	6.76663	1.31813e-11	2.69135e-10
NM_145218	1188.32	2.06464	0.224863	9.18176	4.241e-20	2.09172e-18
NM_008230	24.3717	2.0612	0.42432	4.85766	1.18784e-06	1.11938e-05
NM_146162	13.2132	2.06106	0.50277	4.0994	4.14221e-05	0.000280418
NM_001190483	1028.08	2.06042	0.209062	9.85552	6.48828e-23	3.92298e-21
NM_001081050	2063.66	2.05984	0.209986	9.80944	1.02538e-22	6.15201e-21
NM_001114311	2432.51	2.05967	0.240521	8.56334	1.0964e-17	4.08514e-16
NM_001286376	2432.51	2.05967	0.240521	8.56334	1.0964e-17	4.08514e-16
NM_001252387	80.3157	2.05676	0.383784	5.35916	8.36085e-08	9.73795e-07
NM_182807	80.3157	2.05676	0.383784	5.35916	8.36085e-08	9.73795e-07
NR_045514	80.3157	2.05676	0.383784	5.35916	8.36085e-08	9.73795e-07
NM_001164110	349.574	2.05648	0.230524	8.92091	4.6246e-19	2.05883e-17
NM_198429	349.574	2.05648	0.230524	8.92091	4.6246e-19	2.05883e-17
NM_007606	67.6097	2.05631	0.402171	5.11301	3.17058e-07	3.32237e-06
NM_001204281	320.91	2.05628	0.330359	6.22438	4.83456e-10	8.15013e-09
NM_001290789	87.858	2.05609	0.364487	5.64104	1.69024e-08	2.20826e-07
NM_027917	87.858	2.05609	0.364487	5.64104	1.69024e-08	2.20826e-07
NM_001276489	225.643	2.05509	0.365425	5.62384	1.86762e-08	2.41572e-07
NM_007664	5650.58	2.05443	0.245628	8.364	6.06249e-17	2.12359e-15
NM_016791	257.282	2.05239	0.237032	8.65868	4.77267e-18	1.85508e-16
NM_001159533	362.269	2.05207	0.248137	8.26991	1.34061e-16	4.52001e-15
NM_001159534	362.269	2.05207	0.248137	8.26991	1.34061e-16	4.52001e-15
NM_001159535	362.269	2.05207	0.248137	8.26991	1.34061e-16	4.52001e-15
NM_001256000	362.269	2.05207	0.248137	8.26991	1.34061e-16	4.52001e-15
NM_001256001	362.269	2.05207	0.248137	8.26991	1.34061e-16	4.52001e-15
NM_001256002	362.269	2.05207	0.248137	8.26991	1.34061e-16	4.52001e-15
NM_013599	37.7316	2.04983	0.396215	5.17352	2.29725e-07	2.46349e-06
NM_001177982	73.9571	2.04959	0.319903	6.40691	1.48502e-10	2.63843e-09
NM_013601	117.461	2.04892	0.277895	7.37298	1.6685e-13	4.12261e-12
NM_001033373	103.338	2.04713	0.267706	7.64694	2.05815e-14	5.58684e-13
NM_010104	963.171	2.0448	0.343058	5.96049	2.51478e-09	3.79144e-08
NM_001043354	42.015	2.04376	0.359881	5.679	1.35482e-08	1.79918e-07
NR_045113	60.5511	2.04242	0.338006	6.04254	1.51705e-09	2.34772e-08
NM_173440	10004.3	2.03995	0.193288	10.5539	4.87118e-26	3.8507e-24
NM_001255997	364.959	2.03696	0.248762	8.18841	2.64708e-16	8.6146e-15
NM_001255998	364.959	2.03696	0.248762	8.18841	2.64708e-16	8.6146e-15
NM_001255999	364.959	2.03696	0.248762	8.18841	2.64708e-16	8.6146e-15
NM_009781	364.959	2.03696	0.248762	8.18841	2.64708e-16	8.6146e-15
NM_139300	199.708	2.03494	0.25904	7.85572	3.97489e-15	1.17287e-13
NR_040324	21.2332	2.03429	0.408158	4.98407	6.22608e-07	6.16782e-06
NR_040325	21.2332	2.03429	0.408158	4.98407	6.22608e-07	6.16782e-06
NM_007498	2044.78	2.03077	0.486215	4.1767	2.95774e-05	0.000207086
NM_001081035	133.715	2.0306	0.286615	7.08476	1.39281e-12	3.12168e-11
NR_015483	446.331	2.03047	0.255611	7.94359	1.96407e-15	5.96847e-14
NM_133738	584.016	2.02681	0.432144	4.69012	2.73044e-06	2.39556e-05
NM_001277281	46.1364	2.02585	0.296297	6.83722	8.07425e-12	1.6914e-10
NM_001277284	46.1364	2.02585	0.296297	6.83722	8.07425e-12	1.6914e-10
NM_001252071	866.287	2.02469	0.280783	7.21087	5.55972e-13	1.31009e-11
NM_028317	40.1034	2.02417	0.423816	4.77607	1.78758e-06	1.6288e-05
NM_021359	35.3493	2.02044	0.432615	4.67029	3.00776e-06	2.60276e-05
NM_007729	1311.7	2.02031	0.26946	7.49764	6.49787e-14	1.67819e-12
NM_001177871	661.895	2.01927	0.335696	6.01518	1.79682e-09	2.75697e-08
NM_011041	13.4193	2.01735	0.444268	4.54084	5.60313e-06	4.55868e-05
NM_011536	191.484	2.01412	0.233799	8.61473	7.01082e-18	2.68488e-16
NM_001040397	686.697	2.01287	0.330332	6.09346	1.10499e-09	1.76972e-08
NM_010753	171.893	2.01182	0.314881	6.38915	1.6681e-10	2.94803e-09
NM_010835	23.5476	2.01035	0.41057	4.8965	9.75585e-07	9.34031e-06
NM_010658	11.0411	2.00438	0.511342	3.91984	8.86089e-05	0.000548073
NM_011704	52.3678	2.00361	0.341549	5.86624	4.4578e-09	6.4348e-08
NR_040356	195.607	1.99989	0.308958	6.47302	9.60654e-11	1.77274e-09
NM_009167	187.229	1.99642	0.373753	5.34155	9.21575e-08	1.06541e-06
NM_001286607	201.67	1.99631	0.474436	4.20775	2.57927e-05	0.000183052
NM_212435	201.67	1.99631	0.474436	4.20775	2.57927e-05	0.000183052
NR_046131	42.2047	1.99623	0.401658	4.96997	6.69644e-07	6.57533e-06
NM_001146080	447.829	1.99596	0.250727	7.96069	1.7108e-15	5.21237e-14
NM_033073	236.368	1.99581	0.3392	5.88387	4.00792e-09	5.85037e-08
NM_001127330	34.5632	1.99568	0.354014	5.63729	1.72745e-08	2.25317e-07
NM_001308352	34.5632	1.99568	0.354014	5.63729	1.72745e-08	2.25317e-07
NM_130451	12.7738	1.99192	0.473469	4.20708	2.58687e-05	0.00018348
NM_011994	28.2408	1.99042	0.38408	5.18231	2.1916e-07	2.35884e-06
NM_001308354	34.2881	1.9877	0.354509	5.60691	2.05974e-08	2.64559e-07
NM_011782	144.33	1.98701	0.313738	6.33335	2.39892e-10	4.18898e-09
NM_001164109	262.06	1.98695	0.236506	8.40128	4.41621e-17	1.56095e-15
NR_036631	9.80037	1.98539	0.511072	3.88475	0.000102435	0.00062047
NM_138666	34.0979	1.98488	0.329262	6.02826	1.65731e-09	2.55631e-08
NM_007903	17.9121	1.97844	0.458802	4.31219	1.61646e-05	0.000120304
NM_001001986	389.023	1.9776	0.310335	6.37246	1.86019e-10	3.27514e-09
NM_001004190	1421.73	1.97655	0.179392	11.018	3.12819e-28	2.73122e-26
NM_153790	335.022	1.97567	0.355358	5.55967	2.70287e-08	3.40207e-07
NM_026056	891.347	1.97559	0.221377	8.92413	4.49226e-19	2.00984e-17
NM_172553	19.1447	1.97508	0.426761	4.62806	3.69113e-06	3.11913e-05
NM_001172207	17.5021	1.97274	0.430579	4.58159	4.61454e-06	3.81727e-05
NM_001193274	11.3142	1.97092	0.487958	4.03913	5.36497e-05	0.00035342
NM_183143	11.3142	1.97092	0.487958	4.03913	5.36497e-05	0.00035342
NM_001159564	43.2861	1.96849	0.393548	5.0019	5.67668e-07	5.67159e-06
NM_001159572	176.096	1.96797	0.326737	6.0231	1.71105e-09	2.62963e-08
NM_028732	176.096	1.96797	0.326737	6.0231	1.71105e-09	2.62963e-08
NM_001293689	135.718	1.96715	0.215227	9.13989	6.25181e-20	3.03498e-18
NM_172271	135.718	1.96715	0.215227	9.13989	6.25181e-20	3.03498e-18
NM_001136076	836.245	1.9668	0.245343	8.01655	1.08756e-15	3.36611e-14
NM_011031	836.245	1.9668	0.245343	8.01655	1.08756e-15	3.36611e-14
NM_001177981	67.5141	1.96413	0.320867	6.12133	9.27996e-10	1.51003e-08
NM_021440	159.19	1.9629	0.321891	6.09803	1.07381e-09	1.72806e-08
NM_148944	31.0327	1.9619	0.3937	4.98325	6.25248e-07	6.19135e-06
NM_001081187	29.239	1.96146	0.405258	4.84002	1.29825e-06	1.21511e-05
NM_023275	101.877	1.95581	0.312113	6.26634	3.69628e-10	6.30849e-09
NM_172838	197.029	1.95539	0.292601	6.68279	2.34431e-11	4.6645e-10
NM_001081224	273.831	1.94971	0.368707	5.28797	1.23682e-07	1.39742e-06
NM_008091	310.241	1.94715	0.26471	7.35579	1.89807e-13	4.67998e-12
NM_001004363	4166.57	1.94668	0.218043	8.92795	4.33988e-19	1.94538e-17
NM_008700	10.7044	1.94624	0.525766	3.70171	0.000214149	0.00119306
NM_009402	34.5863	1.9452	0.464056	4.19174	2.76828e-05	0.000194871
NM_013505	576.78	1.94228	0.341801	5.68249	1.32745e-08	1.76683e-07
NM_015764	1308.65	1.94166	0.264299	7.34643	2.03574e-13	4.98789e-12
NM_012014	12.1111	1.94163	0.48955	3.96615	7.30436e-05	0.000463309
NM_134112	2070.93	1.93813	0.21948	8.83056	1.04155e-18	4.43922e-17
NM_178870	58.3544	1.93755	0.332278	5.83111	5.50584e-09	7.80322e-08
NM_027770	105.989	1.93744	0.292633	6.62072	3.57457e-11	6.98758e-10
NM_001290802	31.2341	1.93547	0.346788	5.58112	2.38971e-08	3.02745e-07
NM_001290804	31.2341	1.93547	0.346788	5.58112	2.38971e-08	3.02745e-07
NR_045403	66.0373	1.93489	0.280712	6.89281	5.47006e-12	1.16252e-10
NM_144512	14.213	1.9346	0.463926	4.17005	3.04529e-05	0.000212643
NM_007645	31.0847	1.93314	0.34877	5.54275	2.97752e-08	3.73371e-07
NM_175548	91.0187	1.93264	0.244405	7.90751	2.62578e-15	7.93807e-14
NM_172798	141.55	1.93084	0.253644	7.61239	2.69077e-14	7.18736e-13
NM_010348	52.0187	1.92946	0.274474	7.02965	2.07055e-12	4.59665e-11
NM_146072	52.0187	1.92946	0.274474	7.02965	2.07055e-12	4.59665e-11
NM_001004366	734.085	1.92797	0.198404	9.71742	2.54146e-22	1.47929e-20
NM_001253916	21.6569	1.92581	0.436988	4.40702	1.04803e-05	8.09067e-05
NM_001253917	21.6569	1.92581	0.436988	4.40702	1.04803e-05	8.09067e-05
NM_019982	21.6569	1.92581	0.436988	4.40702	1.04803e-05	8.09067e-05
NM_001214911	77.5779	1.9226	0.330078	5.82468	5.72227e-09	8.08546e-08
NM_177357	3165.82	1.92197	0.183622	10.467	1.22444e-25	9.51848e-24
NM_029554	602.606	1.92074	0.267596	7.17774	7.08748e-13	1.64851e-11
NM_172690	7.32732	1.91947	0.535908	3.58171	0.000341358	0.00180344
NM_015753	1936.62	1.91946	0.468666	4.09558	4.21111e-05	0.000284703
NM_009520	53.6402	1.91885	0.351427	5.46017	4.75682e-08	5.79109e-07
NM_001048207	92.6302	1.91816	0.281491	6.81428	9.47341e-12	1.96622e-10
NM_001289521	1928.89	1.9172	0.469969	4.07942	4.51489e-05	0.000303574
NM_153553	10.2217	1.91603	0.488565	3.92174	8.79105e-05	0.000544329
NM_009181	153.748	1.91512	0.281048	6.81421	9.47859e-12	1.96622e-10
NM_011594	799.146	1.9145	0.305176	6.27342	3.53199e-10	6.04572e-09
NM_029310	45.7836	1.91218	0.332812	5.74552	9.1637e-09	1.25173e-07
NM_008867	153.54	1.91186	0.296383	6.45066	1.11367e-10	2.0295e-09
NM_172492	19.3554	1.90991	0.403654	4.73155	2.2281e-06	1.9861e-05
NM_172385	351.492	1.90818	0.268301	7.11209	1.14299e-12	2.59659e-11
NM_011701	921.993	1.90789	0.207369	9.20049	3.5632e-20	1.77018e-18
NM_011393	21.4627	1.90448	0.401921	4.73844	2.15374e-06	1.92496e-05
NM_013657	1625.52	1.90185	0.277219	6.86045	6.86419e-12	1.4496e-10
NM_007553	59.4659	1.90132	0.337009	5.64174	1.68337e-08	2.20298e-07
NM_176959	2229.12	1.90035	0.246091	7.72213	1.14398e-14	3.20574e-13
NM_001033542	70.8459	1.89632	0.271971	6.9725	3.11348e-12	6.75809e-11
NM_001110513	861.362	1.89531	0.253402	7.47947	7.46239e-14	1.90833e-12
NM_001081146	2893.16	1.89446	0.215216	8.8026	1.33686e-18	5.61603e-17
NM_001039371	187.21	1.89262	0.319191	5.92945	3.03952e-09	4.53872e-08
NM_016697	13598.8	1.89126	0.216107	8.75152	2.10504e-18	8.73329e-17
NM_007416	17.14	1.89109	0.467988	4.04091	5.32449e-05	0.000351248
NM_001081358	173.288	1.89042	0.218299	8.65977	4.72735e-18	1.84052e-16
NM_001291452	173.288	1.89042	0.218299	8.65977	4.72735e-18	1.84052e-16
NM_001291453	173.288	1.89042	0.218299	8.65977	4.72735e-18	1.84052e-16
NR_030601	10.6992	1.88991	0.479785	3.93908	8.17939e-05	0.000511737
NM_029004	32.4698	1.88732	0.340634	5.54063	3.01394e-08	3.77735e-07
NM_001033186	187.088	1.88492	0.275493	6.84198	7.8105e-12	1.63908e-10
NM_001177898	187.088	1.88492	0.275493	6.84198	7.8105e-12	1.63908e-10
NM_001177899	187.088	1.88492	0.275493	6.84198	7.8105e-12	1.63908e-10
NM_013673	14.9757	1.8836	0.49142	3.83297	0.000126605	0.000746391
NM_178774	48.8896	1.88216	0.302105	6.23014	4.66007e-10	7.87869e-09
NM_001079844	8468.37	1.88169	0.180994	10.3964	2.57417e-25	1.95562e-23
NM_011821	8468.37	1.88169	0.180994	10.3964	2.57417e-25	1.95562e-23
NM_178110	324.95	1.88027	0.197547	9.51809	1.76396e-21	9.51033e-20
NM_175006	174.258	1.87909	0.258512	7.26889	3.62447e-13	8.67168e-12
NM_018830	220.111	1.87794	0.24197	7.76105	8.42292e-15	2.39475e-13
NM_194268	353.248	1.87762	0.247958	7.57235	3.66527e-14	9.65807e-13
NM_009237	10.7006	1.87593	0.495196	3.78825	0.000151712	0.000878473
NM_173769	15.8451	1.87524	0.465105	4.03186	5.53363e-05	0.00036361
NM_024449	6.42853	1.87335	0.560863	3.34012	0.000837412	0.0039197
NM_178250	24.5326	1.87285	0.451875	4.14461	3.40386e-05	0.000234808
NM_001038642	3068.47	1.8722	0.45527	4.11228	3.91766e-05	0.000266403
NM_011808	3068.47	1.8722	0.45527	4.11228	3.91766e-05	0.000266403
NM_011445	3963.82	1.87213	0.3181	5.88535	3.97214e-09	5.80175e-08
NM_010657	520.355	1.87169	0.233409	8.01893	1.06673e-15	3.3104e-14
NR_040342	82.1138	1.87017	0.285797	6.5437	6.00171e-11	1.13528e-09
NM_001025559	4258.88	1.86998	0.317541	5.88895	3.88646e-09	5.69439e-08
NM_011227	155.117	1.86968	0.231242	8.08537	6.19773e-16	1.96239e-14
NM_007957	23.9205	1.86956	0.431169	4.33602	1.45087e-05	0.000109062
NM_001004176	2714.11	1.86788	0.336957	5.54338	2.96692e-08	3.72241e-07
NM_001025560	4236.96	1.8656	0.317943	5.86771	4.41851e-09	6.39386e-08
NM_001081153	76.2406	1.86434	0.314489	5.92815	3.06365e-09	4.56892e-08
NM_172053	22.0225	1.86401	0.420117	4.43688	9.12738e-06	7.12142e-05
NM_175259	73.8694	1.86289	0.351547	5.29913	1.16355e-07	1.32101e-06
NM_001146038	72.0681	1.86281	0.262528	7.09569	1.28708e-12	2.89581e-11
NM_001271627	72.0681	1.86281	0.262528	7.09569	1.28708e-12	2.89581e-11
NM_009820	72.0681	1.86281	0.262528	7.09569	1.28708e-12	2.89581e-11
NR_073392	72.0681	1.86281	0.262528	7.09569	1.28708e-12	2.89581e-11
NM_009848	22.0096	1.86159	0.440159	4.22935	2.34364e-05	0.000167651
NM_009880	310.879	1.85939	0.463676	4.0101	6.06926e-05	0.000395253
NM_001111043	782.616	1.85874	0.304902	6.0962	1.0862e-09	1.74082e-08
NM_001111044	782.616	1.85874	0.304902	6.0962	1.0862e-09	1.74082e-08
NM_001285776	782.616	1.85874	0.304902	6.0962	1.0862e-09	1.74082e-08
NM_009825	782.616	1.85874	0.304902	6.0962	1.0862e-09	1.74082e-08
NM_020606	3750.18	1.85644	0.438152	4.23699	2.26539e-05	0.000162501
NM_028071	1160.99	1.85064	0.201581	9.18065	4.28495e-20	2.10638e-18
NM_001029836	789.036	1.84984	0.238222	7.76522	8.15046e-15	2.32576e-13
NM_001287101	789.036	1.84984	0.238222	7.76522	8.15046e-15	2.32576e-13
NM_001287102	789.036	1.84984	0.238222	7.76522	8.15046e-15	2.32576e-13
NM_033525	789.036	1.84984	0.238222	7.76522	8.15046e-15	2.32576e-13
NM_001284380	17.4651	1.84889	0.465943	3.96806	7.24614e-05	0.000460115
NM_001284381	17.4651	1.84889	0.465943	3.96806	7.24614e-05	0.000460115
NM_010597	92.0629	1.84812	0.25238	7.32277	2.42907e-13	5.91445e-12
NM_001287103	786.556	1.8478	0.237845	7.76891	7.91614e-15	2.27276e-13
NM_010710	26.7981	1.84744	0.397889	4.6431	3.43212e-06	2.93202e-05
NM_008727	304.003	1.84719	0.186639	9.89714	4.2837e-23	2.65874e-21
NM_001267622	3939.37	1.84627	0.258154	7.15182	8.56333e-13	1.98193e-11
NM_001287074	158.529	1.84613	0.308549	5.98327	2.18706e-09	3.30801e-08
NM_170597	12.5976	1.84306	0.482434	3.82034	0.00013327	0.000779988
NM_001159556	12.9714	1.84122	0.43776	4.20602	2.59911e-05	0.000184237
NM_001159557	12.9714	1.84122	0.43776	4.20602	2.59911e-05	0.000184237
NM_013592	22.1864	1.83774	0.460149	3.9938	6.50235e-05	0.000419489
NM_001310522	867.324	1.8375	0.497604	3.69268	0.0002219	0.00123156
NM_001310523	867.324	1.8375	0.497604	3.69268	0.0002219	0.00123156
NM_019675	867.324	1.8375	0.497604	3.69268	0.0002219	0.00123156
NM_001145948	98.4351	1.83463	0.291899	6.28515	3.2754e-10	5.61884e-09
NM_172854	60.3891	1.83046	0.302397	6.05315	1.42037e-09	2.22012e-08
NM_001310617	20.7777	1.82826	0.436964	4.184	2.86418e-05	0.000201124
NM_027582	20.7777	1.82826	0.436964	4.184	2.86418e-05	0.000201124
NM_033325	152.212	1.82733	0.295964	6.17418	6.65081e-10	1.10527e-08
NM_173776	169.141	1.82724	0.322924	5.65843	1.52763e-08	2.01607e-07
NM_011416	544.215	1.82599	0.179614	10.1662	2.80783e-24	1.91546e-22
NM_145532	38.8691	1.82462	0.42313	4.31219	1.61643e-05	0.000120304
NM_001163032	50.8082	1.82377	0.34061	5.35443	8.58285e-08	9.96676e-07
NM_173788	46.8832	1.82309	0.359788	5.06713	4.03865e-07	4.14475e-06
NM_001033636	570.96	1.82285	0.266756	6.83341	8.29198e-12	1.73236e-10
NM_001163155	751.037	1.82258	0.457701	3.98204	6.83277e-05	0.00043564
NM_007736	751.037	1.82258	0.457701	3.98204	6.83277e-05	0.00043564
NM_001083616	177.274	1.82023	0.24069	7.56256	3.95212e-14	1.03789e-12
NM_001302637	177.274	1.82023	0.24069	7.56256	3.95212e-14	1.03789e-12
NM_022415	327.833	1.82004	0.228297	7.97222	1.55851e-15	4.77325e-14
NM_008609	316.652	1.81942	0.313486	5.80385	6.48104e-09	9.06455e-08
NM_001205336	321.562	1.81913	0.33594	5.41506	6.12686e-08	7.32563e-07
NM_010154	417.896	1.81893	0.349372	5.20628	1.92668e-07	2.10468e-06
NM_139206	309.232	1.81634	0.336647	5.39538	6.83804e-08	8.10554e-07
NM_001083334	1494.18	1.81531	0.243816	7.44542	9.66378e-14	2.45252e-12
NM_009668	1494.18	1.81531	0.243816	7.44542	9.66378e-14	2.45252e-12
NM_001163660	457.048	1.81429	0.293353	6.18468	6.22293e-10	1.0349e-08
NM_001199304	7531.49	1.81033	0.337852	5.35835	8.39872e-08	9.76613e-07
NM_001199305	7531.49	1.81033	0.337852	5.35835	8.39872e-08	9.76613e-07
NM_009124	7531.49	1.81033	0.337852	5.35835	8.39872e-08	9.76613e-07
NM_001042617	457.352	1.80765	0.267524	6.75695	1.40927e-11	2.85737e-10
NM_012061	457.352	1.80765	0.267524	6.75695	1.40927e-11	2.85737e-10
NM_029102	20.7623	1.80735	0.381006	4.74362	2.09934e-06	1.88432e-05
NM_001159523	36.6611	1.80671	0.385199	4.69033	2.72769e-06	2.39404e-05
NM_009168	36.6611	1.80671	0.385199	4.69033	2.72769e-06	2.39404e-05
NM_026178	682.149	1.80616	0.240792	7.50091	6.33755e-14	1.63859e-12
NM_001122754	41.2822	1.80536	0.33289	5.42331	5.85067e-08	7.01331e-07
NM_001289494	41.2822	1.80536	0.33289	5.42331	5.85067e-08	7.01331e-07
NM_001289495	41.2822	1.80536	0.33289	5.42331	5.85067e-08	7.01331e-07
NM_001081984	18.8279	1.8053	0.420114	4.29718	1.72985e-05	0.000127647
NM_022318	18.8279	1.8053	0.420114	4.29718	1.72985e-05	0.000127647
NM_008391	1183.91	1.80368	0.466501	3.86639	0.000110457	0.000662545
NM_001037987	585.302	1.80266	0.263128	6.85087	7.33999e-12	1.54728e-10
NM_010103	585.302	1.80266	0.263128	6.85087	7.33999e-12	1.54728e-10
NM_001099634	2251.26	1.80176	0.423863	4.2508	2.13011e-05	0.000153882
NM_001302140	2251.26	1.80176	0.423863	4.2508	2.13011e-05	0.000153882
NR_033595	16.6173	1.80038	0.487429	3.69362	0.000221088	0.00122792
NM_018782	127.296	1.7972	0.328761	5.46657	4.58822e-08	5.59457e-07
NM_010292	26.7452	1.7969	0.390282	4.6041	4.14245e-06	3.46299e-05
NM_025496	104.038	1.79641	0.271528	6.61592	3.6924e-11	7.20588e-10
NM_181585	1325.36	1.79435	0.233386	7.68834	1.49054e-14	4.14711e-13
NM_029614	343.688	1.79401	0.319834	5.60917	2.03294e-08	2.61511e-07
NM_170758	45.2214	1.79357	0.319214	5.6187	1.92399e-08	2.48315e-07
NM_029600	49.2002	1.79344	0.317646	5.64604	1.6419e-08	2.15232e-07
NM_025331	14.6683	1.79271	0.448702	3.99532	6.4607e-05	0.000417147
NM_001289656	254.409	1.79251	0.295842	6.05903	1.36942e-09	2.1491e-08
NM_001289657	254.409	1.79251	0.295842	6.05903	1.36942e-09	2.1491e-08
NM_178630	254.409	1.79251	0.295842	6.05903	1.36942e-09	2.1491e-08
NR_030469	24.5587	1.7923	0.421339	4.2538	2.10169e-05	0.00015197
NM_001306071	1679.58	1.79185	0.181217	9.88788	4.69859e-23	2.90853e-21
NM_027280	513.978	1.78939	0.295701	6.05136	1.4363e-09	2.24214e-08
NM_001081655	253.713	1.78908	0.331917	5.39014	7.04019e-08	8.33671e-07
NM_001195031	1068.91	1.78733	0.181293	9.85879	6.28046e-23	3.80716e-21
NM_053182	1068.91	1.78733	0.181293	9.85879	6.28046e-23	3.80716e-21
NM_001122952	3610.56	1.78733	0.275889	6.47843	9.26809e-11	1.71705e-09
NR_028262	85.9114	1.78672	0.363212	4.91923	8.68869e-07	8.39215e-06
NM_207651	45.4988	1.78658	0.336688	5.30633	1.11857e-07	1.27055e-06
NM_001162477	1205.45	1.78601	0.294824	6.05789	1.37917e-09	2.1615e-08
NM_010248	1205.45	1.78601	0.294824	6.05789	1.37917e-09	2.1615e-08
NM_001130176	12.579	1.78444	0.481907	3.70287	0.00021317	0.00118789
NM_001122953	3594.72	1.78239	0.277263	6.42849	1.28875e-10	2.32144e-09
NM_010905	3594.72	1.78239	0.277263	6.42849	1.28875e-10	2.32144e-09
NM_011526	1624.67	1.78187	0.488025	3.65119	0.000261027	0.00142905
NM_001195130	3513.07	1.78105	0.1919	9.28117	1.67628e-20	8.54538e-19
NM_001311098	69.0598	1.77989	0.303358	5.8673	4.42941e-09	6.39776e-08
NM_030068	69.0598	1.77989	0.303358	5.8673	4.42941e-09	6.39776e-08
NM_021457	47.5105	1.77967	0.338061	5.26435	1.40684e-07	1.57137e-06
NM_001012765	390.178	1.77873	0.239271	7.43396	1.0539e-13	2.66022e-12
NM_001277328	2553.81	1.77866	0.326342	5.45029	5.02879e-08	6.11583e-07
NM_028608	15.3135	1.77781	0.474664	3.74541	0.000180103	0.00102262
NM_177068	60.3477	1.77684	0.310689	5.71903	1.07133e-08	1.44651e-07
NM_009553	167.599	1.77486	0.241388	7.35273	1.94195e-13	4.77793e-12
NM_001037905	647.649	1.77411	0.224872	7.88941	3.03616e-15	9.08479e-14
NM_001102400	647.649	1.77411	0.224872	7.88941	3.03616e-15	9.08479e-14
NM_001310446	647.649	1.77411	0.224872	7.88941	3.03616e-15	9.08479e-14
NM_023118	647.649	1.77411	0.224872	7.88941	3.03616e-15	9.08479e-14
NM_177708	581.539	1.77199	0.282448	6.27368	3.52609e-10	6.04004e-09
NM_001145921	247.495	1.77114	0.294769	6.00859	1.87144e-09	2.86582e-08
NM_001145922	247.495	1.77114	0.294769	6.00859	1.87144e-09	2.86582e-08
NM_198249	247.495	1.77114	0.294769	6.00859	1.87144e-09	2.86582e-08
NM_174876	137.989	1.7709	0.334608	5.29248	1.20667e-07	1.36466e-06
NM_172964	5870.59	1.76985	0.212024	8.34739	6.97889e-17	2.42284e-15
NR_038057	13.6347	1.76918	0.47463	3.72749	0.000193397	0.00108912
NM_027656	407.368	1.76914	0.18256	9.69076	3.3007e-22	1.90229e-20
NM_027808	173.344	1.76525	0.317305	5.56325	2.64793e-08	3.33471e-07
NM_007542	32.1476	1.76309	0.441393	3.99437	6.48661e-05	0.000418704
NM_153744	21.9377	1.76103	0.44107	3.99263	6.53442e-05	0.000421209
NM_001252563	22.3537	1.75924	0.45466	3.86935	0.000109126	0.000655403
NM_030174	280.415	1.7591	0.320509	5.48845	4.05466e-08	4.98031e-07
NM_001008702	651.176	1.75887	0.224014	7.8516	4.10759e-15	1.20897e-13
NM_001110783	70.2526	1.7547	0.27102	6.47443	9.51719e-11	1.75903e-09
NM_001277280	70.2526	1.7547	0.27102	6.47443	9.51719e-11	1.75903e-09
NM_181395	1818.31	1.75461	0.223399	7.85415	4.02504e-15	1.18617e-13
NM_008858	2965.92	1.75296	0.198034	8.85181	8.61116e-19	3.71073e-17
NM_001286340	7.52618	1.7528	0.548612	3.19498	0.00139841	0.00607413
NM_009334	7.52618	1.7528	0.548612	3.19498	0.00139841	0.00607413
NM_013845	4688.78	1.75029	0.3145	5.56529	2.61711e-08	3.29945e-07
NR_033504	9.09775	1.7492	0.542065	3.22693	0.00125128	0.00553159
NM_139051	13.3525	1.74917	0.442026	3.95717	7.58434e-05	0.00047912
NM_001163640	2010.84	1.74614	0.249308	7.00397	2.48813e-12	5.45639e-11
NM_020030	27.4586	1.7447	0.361606	4.82486	1.40102e-06	1.30348e-05
NM_001287386	10.2398	1.74289	0.485012	3.5935	0.00032627	0.00173865
NM_008542	2161.95	1.74223	0.203718	8.55218	1.20787e-17	4.44384e-16
NM_001085409	1101.56	1.74138	0.142568	12.2143	2.60672e-34	2.98993e-32
NM_001081970	101.86	1.74111	0.342527	5.08313	3.71272e-07	3.83719e-06
NM_001142731	1690.52	1.74023	0.23587	7.37793	1.60767e-13	3.97652e-12
NM_030683	44.3867	1.73984	0.338579	5.13864	2.76729e-07	2.92465e-06
NM_198013	2992.21	1.73609	0.244539	7.09942	1.25283e-12	2.83511e-11
NM_010570	1758.67	1.73573	0.310785	5.58499	2.3372e-08	2.97057e-07
NM_173419	83.513	1.73459	0.231224	7.50177	6.2963e-14	1.63153e-12
NM_001277326	2803.3	1.73319	0.316833	5.47035	4.49142e-08	5.48225e-07
NM_177360	76.2511	1.73286	0.245155	7.0684	1.56735e-12	3.49947e-11
NM_001252653	166.257	1.73164	0.229132	7.55737	4.11294e-14	1.0777e-12
NM_007899	166.257	1.73164	0.229132	7.55737	4.11294e-14	1.0777e-12
NM_001013771	104.886	1.73106	0.28906	5.98859	2.11672e-09	3.20993e-08
NM_001310145	71.7623	1.73037	0.369753	4.6798	2.87158e-06	2.50623e-05
NM_001310146	71.7623	1.73037	0.369753	4.6798	2.87158e-06	2.50623e-05
NM_199311	17.3759	1.72986	0.415839	4.15993	3.18338e-05	0.00022123
NM_172863	1137.2	1.72742	0.263772	6.54891	5.79603e-11	1.09726e-09
NM_001081185	924.514	1.72708	0.351512	4.91329	8.95622e-07	8.6206e-06
NM_001311074	924.514	1.72708	0.351512	4.91329	8.95622e-07	8.6206e-06
NM_001048177	1032.41	1.72328	0.225371	7.64643	2.0663e-14	5.59599e-13
NM_008413	1032.41	1.72328	0.225371	7.64643	2.0663e-14	5.59599e-13
NM_001081354	104.157	1.72247	0.327845	5.25392	1.48899e-07	1.65514e-06
NM_001256048	104.157	1.72247	0.327845	5.25392	1.48899e-07	1.65514e-06
NM_001081123	14.1588	1.71983	0.447931	3.83949	0.000123289	0.000730521
NM_001277327	2682.41	1.71957	0.316045	5.4409	5.30112e-08	6.41702e-07
NM_001172099	605.01	1.71753	0.231991	7.40341	1.32734e-13	3.31467e-12
NM_001256122	504.378	1.71707	0.178019	9.64542	5.14002e-22	2.9051e-20
NM_054041	936.378	1.71685	0.200599	8.55861	1.14232e-17	4.21007e-16
NM_001081220	24.2919	1.71665	0.412864	4.15792	3.21162e-05	0.000222927
NM_001113368	15.2175	1.71578	0.437167	3.92477	8.68136e-05	0.000538534
NM_001113369	15.2175	1.71578	0.437167	3.92477	8.68136e-05	0.000538534
NM_007543	15.2175	1.71578	0.437167	3.92477	8.68136e-05	0.000538534
NM_030263	1171.34	1.71465	0.20169	8.50143	1.87272e-17	6.77277e-16
NM_019724	712.571	1.71368	0.221572	7.73422	1.04041e-14	2.93307e-13
NM_178756	336.637	1.71267	0.209392	8.17925	2.85609e-16	9.25618e-15
NM_001290646	27.8911	1.71222	0.399349	4.28754	1.80665e-05	0.000132853
NM_175473	1701.72	1.71128	0.282581	6.05588	1.39653e-09	2.18432e-08
NM_010169	761.099	1.71049	0.187551	9.12009	7.50622e-20	3.6364e-18
NR_027973	2219.02	1.70855	0.184529	9.25894	2.06467e-20	1.05025e-18
NM_145492	3607.95	1.70701	0.20756	8.22419	1.96506e-16	6.50361e-15
NM_001285806	824.214	1.70677	0.225216	7.57837	3.49931e-14	9.25203e-13
NM_177078	824.214	1.70677	0.225216	7.57837	3.49931e-14	9.25203e-13
NM_001195229	264.456	1.70651	0.231868	7.35983	1.84145e-13	4.54515e-12
NM_181422	8.81552	1.70506	0.498494	3.42043	0.000625216	0.00303075
NM_001277875	505.934	1.70471	0.28481	5.98543	2.15823e-09	3.26653e-08
NM_001277876	505.934	1.70471	0.28481	5.98543	2.15823e-09	3.26653e-08
NM_009416	505.934	1.70471	0.28481	5.98543	2.15823e-09	3.26653e-08
NM_008873	56.0929	1.70462	0.320798	5.31368	1.07433e-07	1.22565e-06
NR_110489	45.8003	1.7035	0.374311	4.55103	5.33839e-06	4.35844e-05
NM_053254	122.049	1.70315	0.28165	6.04703	1.47536e-09	2.29078e-08
NM_001284520	14.5332	1.70086	0.475896	3.57401	0.00035155	0.00185143
NM_007717	14.5332	1.70086	0.475896	3.57401	0.00035155	0.00185143
NM_001159520	511.748	1.7002	0.525094	3.2379	0.00120414	0.0053454
NM_008781	511.748	1.7002	0.525094	3.2379	0.00120414	0.0053454
NM_145144	518.315	1.70019	0.221218	7.68559	1.52294e-14	4.23221e-13
NM_011595	1027.8	1.69959	0.300381	5.65811	1.53052e-08	2.01648e-07
NM_001290997	273.486	1.69898	0.269606	6.3017	2.94398e-10	5.06888e-09
NM_001244916	145.343	1.6964	0.291921	5.81115	6.20446e-09	8.69331e-08
NM_175467	49.1401	1.69585	0.397006	4.27159	1.94087e-05	0.000141654
NM_001177371	335.263	1.69534	0.289643	5.85321	4.82162e-09	6.90037e-08
NM_001177372	335.263	1.69534	0.289643	5.85321	4.82162e-09	6.90037e-08
NM_019813	335.263	1.69534	0.289643	5.85321	4.82162e-09	6.90037e-08
NM_001163686	495.962	1.69475	0.193439	8.76118	1.93224e-18	8.04491e-17
NM_029761	495.962	1.69475	0.193439	8.76118	1.93224e-18	8.04491e-17
NM_134082	6935.66	1.69463	0.279373	6.06582	1.31285e-09	2.07144e-08
NM_177784	230.616	1.69426	0.221735	7.6409	2.15708e-14	5.81492e-13
NM_027626	575.669	1.69355	0.214858	7.88218	3.21728e-15	9.6022e-14
NM_001001738	858.035	1.69307	0.262413	6.45193	1.10432e-10	2.01985e-09
NM_010437	2243.89	1.69247	0.24275	6.97209	3.12276e-12	6.77196e-11
NM_024286	76.7734	1.68873	0.297364	5.67902	1.35471e-08	1.79918e-07
NM_010826	21.208	1.68851	0.437575	3.85878	0.000113953	0.000681415
NM_001289591	15.9319	1.6879	0.445881	3.78554	0.000153375	0.000886786
NM_001289592	15.9319	1.6879	0.445881	3.78554	0.000153375	0.000886786
NM_028261	15.9319	1.6879	0.445881	3.78554	0.000153375	0.000886786
NM_001142804	143.739	1.68736	0.288562	5.84746	4.99136e-09	7.12488e-08
NM_133186	1044.03	1.68446	0.143787	11.715	1.06826e-31	1.10116e-29
NM_001081643	11.4885	1.68361	0.481935	3.49344	0.000476847	0.00241092
NR_015533	197.287	1.68295	0.289417	5.81498	6.06417e-09	8.52225e-08
NR_033549	11.525	1.68294	0.441866	3.80872	0.000139687	0.000813471
NM_011546	3543.88	1.68285	0.299225	5.62404	1.86538e-08	2.41416e-07
NM_172646	253.799	1.68139	0.221861	7.57858	3.49347e-14	9.25203e-13
NM_029837	7120.07	1.68129	0.227242	7.39867	1.37555e-13	3.42409e-12
NM_001276680	25.9655	1.67919	0.403847	4.15799	3.21058e-05	0.000222927
NM_001143683	7194.16	1.67906	0.225649	7.44105	9.98856e-14	2.52946e-12
NM_001085390	1752.31	1.67876	0.425157	3.94856	7.86227e-05	0.000494674
NM_001038619	255.415	1.67707	0.223856	7.49174	6.79669e-14	1.74957e-12
NM_018774	2927.28	1.67683	0.19402	8.64259	5.49516e-18	2.12883e-16
NM_011520	246.813	1.67644	0.318348	5.26607	1.39375e-07	1.55891e-06
NM_177698	1598.25	1.67622	0.196738	8.52003	1.59512e-17	5.80468e-16
NM_013565	2405.74	1.67549	0.180326	9.29144	1.52219e-20	7.79381e-19
NM_007603	25.4046	1.67541	0.466975	3.5878	0.000333486	0.00177135
NM_001306162	2405.83	1.67495	0.18038	9.28567	1.60686e-20	8.20935e-19
NM_001271860	38.2526	1.67305	0.380535	4.39658	1.09972e-05	8.45625e-05
NM_009610	14.9591	1.67214	0.487757	3.42822	0.000607553	0.00295615
NM_177838	70.8993	1.67193	0.285393	5.85836	4.67467e-09	6.73396e-08
NM_172118	243.135	1.67071	0.361486	4.62178	3.80455e-06	3.20456e-05
NM_011763	168.503	1.66807	0.22498	7.4143	1.22266e-13	3.05979e-12
NM_008130	17535.2	1.66769	0.268076	6.22094	4.94177e-10	8.30693e-09
NM_001252623	95.4544	1.66666	0.270391	6.16391	7.09713e-10	1.17444e-08
NM_172753	95.4544	1.66666	0.270391	6.16391	7.09713e-10	1.17444e-08
NM_013875	20.6875	1.66576	0.410045	4.06238	4.85755e-05	0.000324086
NM_001134300	985.752	1.66544	0.269135	6.18812	6.08878e-10	1.01403e-08
NM_001159662	421.149	1.66479	0.247799	6.71833	1.83818e-11	3.69516e-10
NM_001289450	55.7423	1.66243	0.292957	5.67465	1.38974e-08	1.84241e-07
NM_001276681	25.2842	1.66235	0.407589	4.07848	4.53304e-05	0.000304707
NM_153089	421.243	1.66184	0.247887	6.70402	2.02759e-11	4.06542e-10
NM_009323	766.157	1.66123	0.287119	5.78587	7.21384e-09	1.00654e-07
NM_001134461	2097.16	1.66113	0.218759	7.59345	3.11494e-14	8.27315e-13
NM_206935	13.363	1.66043	0.488095	3.40185	0.000669322	0.00321723
NM_013467	13.5151	1.65818	0.452756	3.66241	0.000249855	0.00137271
NM_001276677	24.0927	1.657	0.40718	4.06946	4.71213e-05	0.000315477
NM_001276679	24.0927	1.657	0.40718	4.06946	4.71213e-05	0.000315477
NM_018800	24.0927	1.657	0.40718	4.06946	4.71213e-05	0.000315477
NM_001164248	14501.3	1.65574	0.343226	4.82404	1.40679e-06	1.30781e-05
NM_001164251	14501.3	1.65574	0.343226	4.82404	1.40679e-06	1.30781e-05
NM_001042504	172.405	1.65455	0.472876	3.49891	0.00046717	0.0023666
NM_001286942	172.405	1.65455	0.472876	3.49891	0.00046717	0.0023666
NM_011098	172.405	1.65455	0.472876	3.49891	0.00046717	0.0023666
NM_181681	46.0388	1.65288	0.339782	4.86453	1.14728e-06	1.08553e-05
NR_033210	46.0388	1.65288	0.339782	4.86453	1.14728e-06	1.08553e-05
NM_026003	148.166	1.65273	0.248338	6.65517	2.82975e-11	5.59706e-10
NM_001034906	14.6524	1.65262	0.445509	3.7095	0.000207671	0.00116196
NM_001276676	25.6899	1.65258	0.402415	4.10666	4.01423e-05	0.000272416
NM_010681	155.014	1.65171	0.226851	7.28101	3.3132e-13	8.01228e-12
NM_028981	189.904	1.65107	0.232231	7.1096	1.16381e-12	2.64132e-11
NM_028958	62.0687	1.65103	0.301067	5.48392	4.15993e-08	5.09891e-07
NM_001164249	17210.5	1.64931	0.340682	4.8412	1.29055e-06	1.20887e-05
NM_001164250	17210.5	1.64931	0.340682	4.8412	1.29055e-06	1.20887e-05
NM_024427	17210.5	1.64931	0.340682	4.8412	1.29055e-06	1.20887e-05
NM_008103	128.076	1.64898	0.303177	5.43899	5.35821e-08	6.48277e-07
NM_177271	229.355	1.64894	0.492077	3.35097	0.00080528	0.00378444
NM_001112702	8.41016	1.64794	0.530484	3.10648	0.00189329	0.00787434
NM_021467	8.41016	1.64794	0.530484	3.10648	0.00189329	0.00787434
NM_007735	37.6549	1.64729	0.436052	3.77775	0.000158254	0.000910494
NM_001164255	16502.9	1.647	0.341527	4.82247	1.41789e-06	1.31603e-05
NM_007670	128.028	1.64352	0.332937	4.93644	7.95621e-07	7.7312e-06
NM_001297612	26.1923	1.64157	0.363249	4.51912	6.20975e-06	5.00696e-05
NM_008879	284.968	1.64095	0.225529	7.27601	3.43835e-13	8.28569e-12
NM_011212	187.755	1.63947	0.250098	6.55531	5.55262e-11	1.05459e-09
NM_031172	11.5138	1.63945	0.458561	3.57521	0.000349948	0.00184424
NM_001042502	164.993	1.63867	0.475462	3.44647	0.000567952	0.00279426
NM_001287048	164.993	1.63867	0.475462	3.44647	0.000567952	0.00279426
NM_001291857	79.4929	1.63794	0.279075	5.86917	4.37986e-09	6.36549e-08
NM_009636	79.4929	1.63794	0.279075	5.86917	4.37986e-09	6.36549e-08
NM_023320	150.91	1.63717	0.297626	5.50077	3.78145e-08	4.66186e-07
NM_001291000	50.1375	1.63664	0.279505	5.8555	4.75578e-09	6.82284e-08
NM_172537	50.1375	1.63664	0.279505	5.8555	4.75578e-09	6.82284e-08
NM_199238	50.1375	1.63664	0.279505	5.8555	4.75578e-09	6.82284e-08
NM_019791	419.938	1.63535	0.272261	6.00654	1.89528e-09	2.90044e-08
NM_001173477	66.1704	1.63516	0.290987	5.61935	1.9168e-08	2.47659e-07
NM_001134459	1966.57	1.63385	0.22309	7.32372	2.4119e-13	5.87876e-12
NM_011800	83.4073	1.63371	0.260463	6.27232	3.55705e-10	6.08417e-09
NM_029847	902.366	1.63347	0.205122	7.96344	1.67327e-15	5.10466e-14
NM_019467	8.39144	1.63288	0.541107	3.01767	0.0025473	0.0100986
NM_009525	486.698	1.63201	0.298867	5.46065	4.74397e-08	5.77846e-07
NM_009373	106.579	1.63183	0.347642	4.694	2.67915e-06	2.35586e-05
NM_198636	131.129	1.63146	0.296068	5.51044	3.57929e-08	4.42897e-07
NM_207655	6595.64	1.63076	0.447294	3.64583	0.000266529	0.00145509
NM_153534	2975.45	1.62951	0.26292	6.19775	5.72762e-10	9.55243e-09
NM_206958	2596.58	1.62845	0.234559	6.9426	3.84942e-12	8.30928e-11
NM_175256	1212.48	1.62841	0.280808	5.79899	6.67135e-09	9.31958e-08
NM_181345	23.0607	1.62783	0.416178	3.91138	9.17721e-05	0.000564596
NM_175260	11890.1	1.62724	0.210706	7.7228	1.13803e-14	3.19289e-13
NM_013468	82.1209	1.62652	0.428948	3.79188	0.000149509	0.000866359
NM_146090	265.278	1.62251	0.199497	8.13302	4.18726e-16	1.34216e-14
NM_011582	31.8614	1.62207	0.318614	5.091	3.56174e-07	3.69092e-06
NM_001289487	32.3453	1.62197	0.435501	3.72437	0.000195807	0.00110084
NM_001289488	32.3453	1.62197	0.435501	3.72437	0.000195807	0.00110084
NM_001289489	32.3453	1.62197	0.435501	3.72437	0.000195807	0.00110084
NM_028807	32.3453	1.62197	0.435501	3.72437	0.000195807	0.00110084
NM_001160268	321.165	1.61997	0.234007	6.92277	4.42898e-12	9.48159e-11
NM_182930	321.165	1.61997	0.234007	6.92277	4.42898e-12	9.48159e-11
NM_053242	533.511	1.61805	0.438782	3.68759	0.000226388	0.00125468
NM_001170935	48.1917	1.61743	0.332397	4.86598	1.13892e-06	1.07849e-05
NR_045499	30.7306	1.61578	0.35102	4.6031	4.16238e-06	3.47717e-05
NM_025451	93.1611	1.61529	0.24793	6.5151	7.26408e-11	1.35869e-09
NM_001244952	311.592	1.61357	0.306514	5.26426	1.40758e-07	1.57137e-06
NM_029838	311.592	1.61357	0.306514	5.26426	1.40758e-07	1.57137e-06
NM_198711	311.592	1.61357	0.306514	5.26426	1.40758e-07	1.57137e-06
NM_026235	40.1222	1.61324	0.338375	4.76762	1.86415e-06	1.69133e-05
NM_008058	114.15	1.61228	0.339444	4.74976	2.03654e-06	1.8314e-05
NM_021883	52.4979	1.6118	0.284033	5.67467	1.38956e-08	1.84241e-07
NM_001109975	93.3546	1.61123	0.344585	4.67586	2.92721e-06	2.54246e-05
NM_013483	28.212	1.61027	0.359113	4.48402	7.32495e-06	5.81005e-05
NM_011909	31.6475	1.60895	0.484594	3.3202	0.000899519	0.0041745
NM_001146708	103.074	1.60853	0.283006	5.68374	1.31779e-08	1.75797e-07
NR_045342	9.05738	1.60812	0.52433	3.06701	0.00216214	0.00878638
NM_145575	8468.84	1.60779	0.311887	5.15503	2.5359e-07	2.69471e-06
NM_001311062	18.2855	1.60671	0.43897	3.66017	0.000252047	0.0013841
NM_010924	18.2855	1.60671	0.43897	3.66017	0.000252047	0.0013841
NM_009627	19.4777	1.60617	0.440404	3.64703	0.000265288	0.00144865
NM_152803	31.0721	1.60277	0.338438	4.73578	2.18209e-06	1.94881e-05
NM_001163387	23.0719	1.60256	0.3773	4.24745	2.1622e-05	0.000156008
NM_001293774	5777.91	1.60183	0.268972	5.95537	2.59484e-09	3.90964e-08
NM_015730	35.3869	1.60164	0.400444	3.99967	6.34304e-05	0.000410569
NM_001164252	13219	1.59986	0.336024	4.76115	1.92495e-06	1.74109e-05
NM_001164253	13219	1.59986	0.336024	4.76115	1.92495e-06	1.74109e-05
NM_001081756	438.386	1.59899	0.243884	6.55634	5.51429e-11	1.04816e-09
NM_176957	438.386	1.59899	0.243884	6.55634	5.51429e-11	1.04816e-09
NM_001164254	10509.7	1.59736	0.337927	4.72693	2.27936e-06	2.02409e-05
NM_001113553	940.128	1.59491	0.177523	8.98425	2.6051e-19	1.19758e-17
NM_172161	940.128	1.59491	0.177523	8.98425	2.6051e-19	1.19758e-17
NM_207000	895.657	1.59465	0.193261	8.25125	1.56749e-16	5.25468e-15
NM_007912	5546.48	1.59461	0.448973	3.55167	0.000382789	0.00199529
NM_001164256	12511.4	1.59435	0.336779	4.7341	2.20025e-06	1.96353e-05
NM_011769	223.713	1.59397	0.237039	6.72449	1.76207e-11	3.54824e-10
NM_001304329	143.237	1.59392	0.365261	4.36377	1.27839e-05	9.72152e-05
NM_001304330	143.237	1.59392	0.365261	4.36377	1.27839e-05	9.72152e-05
NM_013881	774.392	1.59253	0.263226	6.05006	1.44795e-09	2.25871e-08
NM_198861	1207.06	1.59239	0.205282	7.7571	8.68904e-15	2.46741e-13
NM_001109988	710.495	1.59226	0.170649	9.33061	1.05261e-20	5.46121e-19
NM_021492	221.37	1.59146	0.230517	6.9039	5.05923e-12	1.07913e-10
NM_001177964	8.78279	1.59119	0.512061	3.10743	0.00188723	0.00785333
NM_001109989	710.062	1.59068	0.170906	9.30738	1.3103e-20	6.72362e-19
NM_001267717	710.062	1.59068	0.170906	9.30738	1.3103e-20	6.72362e-19
NM_053078	710.062	1.59068	0.170906	9.30738	1.3103e-20	6.72362e-19
NM_028125	548.88	1.58992	0.169732	9.36725	7.445e-21	3.93241e-19
NM_027426	49.9931	1.58959	0.295734	5.37506	7.65574e-08	8.9883e-07
NM_181547	31.8395	1.58937	0.355969	4.46489	8.01083e-06	6.30704e-05
NM_001126047	145.103	1.58809	0.366257	4.336	1.45096e-05	0.000109062
NM_020589	27.6008	1.58744	0.378495	4.19408	2.73986e-05	0.00019316
NM_001252620	239.553	1.58428	0.196533	8.06112	7.55955e-16	2.35534e-14
NM_001252621	239.553	1.58428	0.196533	8.06112	7.55955e-16	2.35534e-14
NM_023689	239.553	1.58428	0.196533	8.06112	7.55955e-16	2.35534e-14
NM_001161746	198.175	1.58377	0.346139	4.57552	4.75039e-06	3.91251e-05
NM_013749	198.175	1.58377	0.346139	4.57552	4.75039e-06	3.91251e-05
NR_045743	23.9487	1.58059	0.413035	3.82677	0.000129836	0.000762178
NM_178755	134.181	1.57943	0.249478	6.33091	2.43715e-10	4.24939e-09
NR_037973	15.4	1.57916	0.438147	3.60418	0.000313141	0.00167939
NM_030708	1220.59	1.57744	0.30982	5.09147	3.55294e-07	3.68723e-06
NM_176965	56.325	1.5772	0.305393	5.16449	2.41096e-07	2.57363e-06
NM_027533	773.738	1.57699	0.228752	6.89389	5.42861e-12	1.15581e-10
NM_027294	509.468	1.5768	0.271291	5.8122	6.16589e-09	8.64444e-08
NM_001291859	273.552	1.57603	0.220789	7.13814	9.46007e-13	2.17656e-11
NM_007484	273.552	1.57603	0.220789	7.13814	9.46007e-13	2.17656e-11
NM_007987	175.142	1.57396	0.30278	5.19837	2.01042e-07	2.19002e-06
NM_177716	12.2904	1.57361	0.45512	3.45756	0.000545095	0.00269598
NM_001080742	29.6915	1.57333	0.424087	3.70993	0.000207314	0.00116023
NM_016872	29.6915	1.57333	0.424087	3.70993	0.000207314	0.00116023
NM_001243132	770.686	1.57139	0.227948	6.89363	5.43847e-12	1.15686e-10
NM_172484	395.413	1.57065	0.24884	6.31188	2.75665e-10	4.75684e-09
NM_178644	125.532	1.57006	0.246389	6.37226	1.86257e-10	3.27686e-09
NM_008750	13569.6	1.56925	0.237205	6.61557	3.70114e-11	7.21691e-10
NM_013568	71.9268	1.56866	0.380247	4.12537	3.70145e-05	0.000253002
NM_001290512	4868.74	1.56784	0.271157	5.78206	7.37898e-09	1.02713e-07
NM_010797	4868.74	1.56784	0.271157	5.78206	7.37898e-09	1.02713e-07
NM_198250	9.92479	1.56701	0.487606	3.21367	0.00131049	0.00574127
NM_027127	75.7616	1.56566	0.298053	5.25296	1.49675e-07	1.6622e-06
NM_026850	1040.98	1.56468	0.237925	6.57637	4.82082e-11	9.28415e-10
NM_001291005	273.546	1.5625	0.311564	5.01502	5.30292e-07	5.33003e-06
NM_019789	273.546	1.5625	0.311564	5.01502	5.30292e-07	5.33003e-06
NM_153393	134.229	1.56239	0.32562	4.79818	1.60112e-06	1.47035e-05
NM_007417	18.5196	1.56045	0.406013	3.84335	0.000121366	0.000720225
NM_001111110	24.9946	1.55991	0.403977	3.86137	0.000112752	0.000675096
NM_001284519	24.9946	1.55991	0.403977	3.86137	0.000112752	0.000675096
NR_110989	273.639	1.55759	0.312204	4.98903	6.06833e-07	6.03712e-06
NM_153507	288.727	1.55752	0.2186	7.12498	1.04096e-12	2.37866e-11
NM_199465	351.599	1.55711	0.301364	5.16689	2.38024e-07	2.54548e-06
NM_026582	5206.17	1.55707	0.321566	4.84216	1.28432e-06	1.20461e-05
NR_037590	5206.17	1.55707	0.321566	4.84216	1.28432e-06	1.20461e-05
NM_001081295	3320.83	1.55612	0.226209	6.87914	6.02148e-12	1.27739e-10
NR_045053	16794.4	1.55609	0.305152	5.09938	3.40766e-07	3.55488e-06
NR_045054	16794.4	1.55609	0.305152	5.09938	3.40766e-07	3.55488e-06
NM_153392	143.646	1.55322	0.272555	5.69874	1.20699e-08	1.61754e-07
NM_001271857	42.7392	1.55311	0.36386	4.26843	1.96856e-05	0.000143407
NM_001271858	42.7392	1.55311	0.36386	4.26843	1.96856e-05	0.000143407
NM_021398	217.612	1.55263	0.227161	6.83493	8.2047e-12	1.71719e-10
NM_178782	748.511	1.55244	0.186108	8.34162	7.32818e-17	2.53657e-15
NM_008856	474.929	1.55243	0.228972	6.77999	1.2018e-11	2.47109e-10
NM_001277188	159	1.55231	0.223997	6.93006	4.20666e-12	9.04702e-11
NR_102339	159	1.55231	0.223997	6.93006	4.20666e-12	9.04702e-11
NM_001159548	5482.05	1.55151	0.254352	6.09988	1.06147e-09	1.70939e-08
NM_001159549	5482.05	1.55151	0.254352	6.09988	1.06147e-09	1.70939e-08
NM_001166597	592.685	1.55076	0.175439	8.83932	9.63008e-19	4.11194e-17
NM_001310434	2324.84	1.54898	0.197697	7.8351	4.68455e-15	1.36505e-13
NM_001081161	2324.91	1.54897	0.197712	7.83447	4.70811e-15	1.37021e-13
NM_001272023	32.375	1.54877	0.343454	4.50938	6.50188e-06	5.22091e-05
NM_011325	32.375	1.54877	0.343454	4.50938	6.50188e-06	5.22091e-05
NR_073548	32.375	1.54877	0.343454	4.50938	6.50188e-06	5.22091e-05
NM_001039075	34.2271	1.54373	0.47532	3.24777	0.00116315	0.00518606
NM_001039076	34.2271	1.54373	0.47532	3.24777	0.00116315	0.00518606
NM_001170978	618.314	1.54251	0.222677	6.9271	4.2955e-12	9.21269e-11
NM_172961	618.314	1.54251	0.222677	6.9271	4.2955e-12	9.21269e-11
NM_001017426	694.293	1.54248	0.27264	5.65756	1.53544e-08	2.02183e-07
NM_007855	127.88	1.54156	0.335937	4.58885	4.45702e-06	3.6956e-05
NM_001286468	126.853	1.54099	0.318526	4.83788	1.31234e-06	1.22683e-05
NM_172568	28.9947	1.54074	0.364621	4.22559	2.3831e-05	0.000170266
NM_001310705	27.0601	1.54067	0.38142	4.0393	5.36111e-05	0.000353365
NM_021507	14.9757	1.54023	0.441904	3.48545	0.000491307	0.00246708
NM_001252651	14.3709	1.53896	0.43815	3.51241	0.000444055	0.00226816
NM_007782	14.3709	1.53896	0.43815	3.51241	0.000444055	0.00226816
NR_045561	14.3709	1.53896	0.43815	3.51241	0.000444055	0.00226816
NM_021306	18.3052	1.5373	0.451296	3.40641	0.000658237	0.00317504
NM_001290428	27.9148	1.53591	0.381319	4.02788	5.62814e-05	0.000369094
NM_172475	3023.28	1.53588	0.162869	9.43021	4.09264e-21	2.1814e-19
NM_018764	77.1123	1.53587	0.558194	2.75151	0.0059322	0.0203262
NM_028266	34.3939	1.53462	0.464318	3.30511	0.000949392	0.00436121
NR_033567	59.8667	1.53231	0.340988	4.49375	6.99799e-06	5.57908e-05
NM_019919	4779.53	1.53231	0.238137	6.43457	1.23824e-10	2.24481e-09
NM_172685	559.163	1.53183	0.336964	4.54597	5.4684e-06	4.45526e-05
NM_001039150	462.394	1.53115	0.32851	4.66089	3.14846e-06	2.71148e-05
NM_001039151	462.394	1.53115	0.32851	4.66089	3.14846e-06	2.71148e-05
NM_001177785	462.394	1.53115	0.32851	4.66089	3.14846e-06	2.71148e-05
NM_001177786	462.394	1.53115	0.32851	4.66089	3.14846e-06	2.71148e-05
NM_001177787	462.394	1.53115	0.32851	4.66089	3.14846e-06	2.71148e-05
NM_009851	462.394	1.53115	0.32851	4.66089	3.14846e-06	2.71148e-05
NM_025760	85.6065	1.53081	0.270389	5.66152	1.5004e-08	1.98126e-07
NM_001012322	12.5972	1.53016	0.503367	3.03985	0.00236699	0.00950331
NM_001311077	12.5972	1.53016	0.503367	3.03985	0.00236699	0.00950331
NR_015561	17.9951	1.52983	0.443068	3.45281	0.000554774	0.00273871
NM_001085415	26.8252	1.52751	0.379223	4.028	5.62526e-05	0.000369009
NM_001085416	26.8252	1.52751	0.379223	4.028	5.62526e-05	0.000369009
NM_001277925	18.2321	1.52727	0.450285	3.39177	0.000694416	0.00332012
NM_001145978	1395.3	1.52622	0.228868	6.66856	2.58327e-11	5.1356e-10
NM_172868	1644.29	1.52526	0.302421	5.0435	4.57094e-07	4.65023e-06
NM_008037	1794.17	1.52523	0.449891	3.39023	0.000698346	0.00333754
NM_011923	152.928	1.52485	0.280705	5.43224	5.56522e-08	6.71587e-07
NM_009511	43.9964	1.52441	0.292474	5.21212	1.86694e-07	2.04611e-06
NM_001145878	9.92794	1.52413	0.493049	3.09123	0.0019933	0.00819417
NM_175751	3889.77	1.52409	0.236413	6.44675	1.14278e-10	2.0793e-09
NM_172289	152.332	1.52366	0.215867	7.05831	1.68535e-12	3.75934e-11
NM_010055	27.7614	1.52343	0.417402	3.64979	0.000262454	0.00143619
NM_198642	9.29139	1.52308	0.529867	2.87446	0.00404725	0.0148455
NM_001031621	28.9923	1.5229	0.350178	4.34893	1.36805e-05	0.000103504
NM_001033351	30.7622	1.52274	0.352912	4.31478	1.59764e-05	0.000119169
NM_001276355	30.7622	1.52274	0.352912	4.31478	1.59764e-05	0.000119169
NM_021320	349.824	1.52215	0.278854	5.45857	4.79976e-08	5.84033e-07
NM_207246	113.093	1.52167	0.275127	5.53077	3.18824e-08	3.97452e-07
NM_001247984	295.399	1.52151	0.207151	7.34494	2.05857e-13	5.03854e-12
NM_001190885	23.0782	1.52063	0.390571	3.89335	9.8871e-05	0.000603727
NM_001290690	23.0782	1.52063	0.390571	3.89335	9.8871e-05	0.000603727
NM_027398	23.0782	1.52063	0.390571	3.89335	9.8871e-05	0.000603727
NM_013880	1540.51	1.52035	0.206905	7.34808	2.01077e-13	4.93186e-12
NM_011611	115.662	1.51927	0.326274	4.65644	3.21717e-06	2.75948e-05
NM_170702	115.662	1.51927	0.326274	4.65644	3.21717e-06	2.75948e-05
NM_170703	115.662	1.51927	0.326274	4.65644	3.21717e-06	2.75948e-05
NM_170704	115.662	1.51927	0.326274	4.65644	3.21717e-06	2.75948e-05
NR_027852	115.662	1.51927	0.326274	4.65644	3.21717e-06	2.75948e-05
NM_001161799	18.1237	1.51774	0.44137	3.4387	0.000584508	0.00285769
NM_010194	16.6624	1.51669	0.428903	3.53622	0.000405899	0.00210311
NM_016689	209.497	1.51464	0.303208	4.99539	5.87174e-07	5.85148e-06
NR_030701	16.775	1.51337	0.447144	3.38452	0.000713027	0.00340076
NM_001081652	25.4325	1.51337	0.394607	3.83513	0.0001255	0.000741
NM_001122758	693.968	1.5126	0.54594	2.77063	0.00559478	0.0193657
NM_001310606	693.968	1.5126	0.54594	2.77063	0.00559478	0.0193657
NM_001310608	693.968	1.5126	0.54594	2.77063	0.00559478	0.0193657
NM_001159638	126.716	1.51255	0.243274	6.21749	5.05186e-10	8.47981e-09
NM_028747	126.716	1.51255	0.243274	6.21749	5.05186e-10	8.47981e-09
NM_024189	2036.99	1.51169	0.199631	7.57242	3.66326e-14	9.65807e-13
NR_028315	2036.99	1.51169	0.199631	7.57242	3.66326e-14	9.65807e-13
NR_003248	61.5471	1.50941	0.444304	3.39724	0.000680695	0.00326452
NM_177265	22.7204	1.50801	0.401288	3.75793	0.000171327	0.000977061
NM_001171512	96.2956	1.50709	0.28292	5.32691	9.9896e-08	1.1475e-06
NM_001033779	21.4276	1.50669	0.401136	3.75606	0.000172607	0.000983404
NM_199152	93.3359	1.50629	0.284883	5.2874	1.24067e-07	1.40108e-06
NM_001170643	199.148	1.50531	0.220645	6.82233	8.95786e-12	1.86647e-10
NM_001161724	534.191	1.50482	0.327137	4.59998	4.22537e-06	3.51723e-05
NM_010562	534.191	1.50482	0.327137	4.59998	4.22537e-06	3.51723e-05
NM_001081324	1563.37	1.5048	0.236576	6.36073	2.00798e-10	3.5221e-09
NM_001134460	1642.43	1.50395	0.214046	7.02628	2.12105e-12	4.70431e-11
NM_001244198	101.965	1.50359	0.364988	4.11956	3.79595e-05	0.000258728
NM_001244201	101.965	1.50359	0.364988	4.11956	3.79595e-05	0.000258728
NM_028724	1104.03	1.50357	0.175403	8.5721	1.01614e-17	3.80428e-16
NM_011437	16.5241	1.50292	0.497748	3.01944	0.00253242	0.0100553
NM_009712	253.181	1.50214	0.234977	6.39269	1.62989e-10	2.88486e-09
NM_027552	272.482	1.50156	0.275838	5.44365	5.21988e-08	6.3285e-07
NM_146136	30.6464	1.5015	0.360915	4.16026	3.17885e-05	0.00022098
NM_001271861	12.5477	1.50084	0.456176	3.29005	0.00100171	0.00455833
NM_177006	53.284	1.50046	0.318061	4.71753	2.38722e-06	2.1165e-05
NM_139298	623.648	1.49986	0.27269	5.50024	3.79273e-08	4.6733e-07
NM_001289593	268.337	1.49947	0.276019	5.43248	5.55762e-08	6.71015e-07
NM_134093	212.495	1.49888	0.220323	6.80309	1.02398e-11	2.11474e-10
NM_008546	17.9775	1.49877	0.440126	3.40532	0.000660877	0.00318405
NM_008471	293.325	1.49766	0.462284	3.2397	0.00119656	0.00532185
NM_001290274	553.374	1.49761	0.28062	5.3368	9.45999e-08	1.09257e-06
NM_017463	147.946	1.4976	0.284056	5.2722	1.34797e-07	1.51349e-06
NM_146050	11.9166	1.4973	0.497976	3.00678	0.00264034	0.0104097
NM_001029838	2836	1.49605	0.254166	5.88609	3.95435e-09	5.783e-08
NM_148950	2836	1.49605	0.254166	5.88609	3.95435e-09	5.783e-08
NM_001283045	3211.01	1.49593	0.144742	10.3351	4.88767e-25	3.60778e-23
NM_175519	216.903	1.49553	0.202584	7.38228	1.55597e-13	3.85271e-12
NR_027888	22.2251	1.49544	0.399206	3.74603	0.000179653	0.00102032
NM_009594	3211.97	1.49528	0.144932	10.3171	5.89587e-25	4.32688e-23
NM_026376	63.2967	1.49494	0.338919	4.41089	1.02945e-05	7.96566e-05
NM_001114385	36.025	1.49456	0.350005	4.27011	1.95378e-05	0.000142508
NM_029296	47.5905	1.4944	0.324713	4.60221	4.18035e-06	3.48782e-05
NM_029352	329.897	1.49357	0.256015	5.8339	5.4147e-09	7.67871e-08
NM_001290735	100.632	1.49309	0.290236	5.14441	2.68357e-07	2.83746e-06
NM_011489	387.505	1.49142	0.277008	5.38401	7.28428e-08	8.58232e-07
NM_009344	228.851	1.4913	0.330969	4.50586	6.61052e-06	5.30451e-05
NM_172892	78.4769	1.49015	0.432213	3.44773	0.000565324	0.00278426
NM_001198823	6583.24	1.4899	0.257997	5.77488	7.70073e-09	1.06558e-07
NM_001198824	6583.24	1.4899	0.257997	5.77488	7.70073e-09	1.06558e-07
NM_001198825	6583.24	1.4899	0.257997	5.77488	7.70073e-09	1.06558e-07
NM_001198826	6583.24	1.4899	0.257997	5.77488	7.70073e-09	1.06558e-07
NM_007471	6583.24	1.4899	0.257997	5.77488	7.70073e-09	1.06558e-07
NM_001195083	2524.29	1.4899	0.193015	7.71908	1.17176e-14	3.27967e-13
NM_015734	1160.78	1.48872	0.249756	5.96069	2.51172e-09	3.78928e-08
NM_031258	34.2646	1.48754	0.356909	4.16783	3.07515e-05	0.000214536
NM_001244200	97.5471	1.48677	0.373171	3.98415	6.77223e-05	0.00043237
NM_001310144	97.5471	1.48677	0.373171	3.98415	6.77223e-05	0.00043237
NM_001311142	1307.36	1.48635	0.205219	7.24276	4.39655e-13	1.04548e-11
NM_028258	1307.36	1.48635	0.205219	7.24276	4.39655e-13	1.04548e-11
NM_212452	13.807	1.48635	0.508739	2.92163	0.00348203	0.0130454
NR_026853	30.9024	1.48578	0.376959	3.9415	8.09728e-05	0.000507278
NM_001244202	96.881	1.48515	0.377313	3.93614	8.28039e-05	0.00051688
NM_013627	96.881	1.48515	0.377313	3.93614	8.28039e-05	0.00051688
NM_023485	150.557	1.48512	0.212422	6.99136	2.7224e-12	5.9534e-11
NM_011825	24.7534	1.48402	0.36542	4.06114	4.88338e-05	0.000325359
NM_008512	1338.62	1.48305	0.223701	6.62959	3.36613e-11	6.60773e-10
NM_024217	149.866	1.48217	0.317253	4.6719	2.9843e-06	2.58628e-05
NM_001163170	142.995	1.48128	0.248966	5.94973	2.68588e-09	4.04161e-08
NM_001252401	45.3065	1.48116	0.323121	4.58392	4.56341e-06	3.77846e-05
NM_176860	647.364	1.48075	0.260256	5.6896	1.2734e-08	1.70362e-07
NM_007675	9.19372	1.48072	0.508239	2.91342	0.00357493	0.0133368
NR_045323	24.9789	1.48019	0.38208	3.87403	0.000107048	0.000644079
NM_019725	47.4645	1.4799	0.31287	4.73008	2.24428e-06	1.99749e-05
NM_001081263	104.643	1.47935	0.238371	6.20609	5.43192e-10	9.09166e-09
NM_176921	197.505	1.4775	0.269405	5.4843	4.15118e-08	5.09086e-07
NM_015775	298.31	1.47721	0.492326	3.00048	0.00269556	0.0105934
NM_001177843	2922.12	1.47714	0.166518	8.87074	7.26616e-19	3.15311e-17
NM_001252442	4436.67	1.4757	0.421082	3.50455	0.000457379	0.00232657
NM_153412	4436.67	1.4757	0.421082	3.50455	0.000457379	0.00232657
NM_133643	51.5761	1.47553	0.301807	4.88899	1.01355e-06	9.67215e-06
NM_177662	49.2414	1.47522	0.433811	3.40059	0.000672396	0.0032283
NM_009601	162.139	1.47475	0.281274	5.24311	1.57892e-07	1.74682e-06
NM_008610	183.948	1.47457	0.282006	5.22885	1.70566e-07	1.87992e-06
NM_153319	702.98	1.47444	0.28856	5.10965	3.2275e-07	3.37747e-06
NM_015772	195.56	1.47181	0.275007	5.35191	8.70324e-08	1.01015e-06
NM_172872	446.747	1.47095	0.229081	6.42108	1.35309e-10	2.42428e-09
NM_016780	230.138	1.46945	0.240533	6.10913	1.00177e-09	1.62105e-08
NM_001285896	15.1125	1.46853	0.444251	3.30564	0.000947607	0.00435963
NM_001081033	354.596	1.46785	0.249505	5.88305	4.02762e-09	5.87546e-08
NM_029858	907.743	1.46672	0.151379	9.68906	3.35598e-22	1.9294e-20
NM_001311151	155.424	1.46638	0.304927	4.80894	1.51732e-06	1.40109e-05
NM_207176	2078.13	1.46594	0.166311	8.81448	1.20239e-18	5.06931e-17
NM_001276387	159.362	1.46448	0.262657	5.57565	2.46606e-08	3.11573e-07
NM_010095	159.362	1.46448	0.262657	5.57565	2.46606e-08	3.11573e-07
NM_019497	302.773	1.46338	0.242076	6.04515	1.49269e-09	2.31307e-08
NM_181444	1659.48	1.46245	0.291216	5.02188	5.11675e-07	5.15176e-06
NM_001039242	23.3303	1.46	0.389831	3.74521	0.000180244	0.00102318
NM_028052	187.711	1.45943	0.255681	5.708	1.14309e-08	1.5372e-07
NM_021890	84.947	1.45937	0.311512	4.6848	2.80237e-06	2.45074e-05
NM_007405	133.857	1.45619	0.256146	5.685	1.30811e-08	1.74607e-07
NR_033213	38.5703	1.45576	0.356677	4.08146	4.4753e-05	0.000301519
NM_001290817	2401.9	1.45558	0.163506	8.90229	5.47077e-19	2.41986e-17
NM_009242	2401.9	1.45558	0.163506	8.90229	5.47077e-19	2.41986e-17
NM_001081390	6818.23	1.45469	0.281598	5.16584	2.39356e-07	2.55739e-06
NM_001305440	314.511	1.4533	0.259605	5.59812	2.16694e-08	2.76921e-07
NM_001305441	314.511	1.4533	0.259605	5.59812	2.16694e-08	2.76921e-07
NM_001305442	314.511	1.4533	0.259605	5.59812	2.16694e-08	2.76921e-07
NM_011896	314.511	1.4533	0.259605	5.59812	2.16694e-08	2.76921e-07
NM_019680	535.915	1.45313	0.242555	5.99091	2.08672e-09	3.16853e-08
NM_001146349	1169.35	1.45294	0.203108	7.15352	8.45789e-13	1.95947e-11
NM_030060	47.6021	1.45216	0.291517	4.98138	6.31321e-07	6.24885e-06
NM_153136	79.2582	1.45201	0.327064	4.43952	9.01579e-06	7.0414e-05
NM_001199227	771.585	1.45127	0.282879	5.13033	2.89229e-07	3.04576e-06
NM_001293773	7029.86	1.45104	0.280485	5.17334	2.2995e-07	2.46478e-06
NM_018885	24.7823	1.446	0.379282	3.81246	0.00013759	0.000802859
NM_001204983	1966.11	1.44514	0.172651	8.37028	5.74796e-17	2.01947e-15
NM_145852	26.9064	1.44492	0.360669	4.00622	6.16971e-05	0.000401014
NM_133681	11.8733	1.44425	0.475248	3.03894	0.00237415	0.00952388
NM_147221	575.002	1.44344	0.248555	5.80734	6.34741e-09	8.88295e-08
NM_001309519	236.752	1.44254	0.248992	5.79351	6.89303e-09	9.62351e-08
NM_016866	1366.6	1.44197	0.252821	5.70351	1.17367e-08	1.5756e-07
NM_001190886	26.6588	1.44169	0.392312	3.67486	0.000237983	0.00131091
NM_172296	77.0108	1.44023	0.234743	6.13533	8.49801e-10	1.38568e-08
NM_001293772	7093.19	1.44	0.277366	5.19171	2.08373e-07	2.25519e-06
NM_026818	63.8219	1.4399	0.322239	4.46844	7.87939e-06	6.20565e-05
NM_001289533	1536.76	1.43987	0.513902	2.80184	0.00508125	0.017863
NM_001013390	19.256	1.43684	0.427914	3.35777	0.000785743	0.00370304
NM_001285897	13.5753	1.43676	0.462972	3.10334	0.00191347	0.00793288
NM_001285898	13.5753	1.43676	0.462972	3.10334	0.00191347	0.00793288
NM_010212	1530.45	1.43673	0.515571	2.78667	0.00532525	0.0185729
NM_025638	440.947	1.43653	0.209772	6.84804	7.48701e-12	1.57685e-10
NM_024289	774.405	1.43495	0.279361	5.13653	2.79853e-07	2.95367e-06
NM_008032	825.064	1.43487	0.23037	6.22857	4.70719e-10	7.94687e-09
NM_012020	12.5843	1.43475	0.474844	3.02152	0.00251509	0.00999841
NM_178676	17.2403	1.43364	0.436843	3.28181	0.00103142	0.00466541
NM_175441	17.4758	1.43165	0.403146	3.55121	0.000383469	0.00199795
NM_001085417	34.2491	1.43107	0.364235	3.92898	8.5308e-05	0.000530244
NM_016701	772.889	1.4299	0.435459	3.28365	0.00102471	0.00464045
NM_176916	235.034	1.42893	0.257122	5.55741	2.73809e-08	3.439e-07
NM_010736	58.724	1.4286	0.340641	4.19384	2.7427e-05	0.000193274
NM_001272041	43.5944	1.42729	0.447397	3.19022	0.00142166	0.00616026
NM_009606	43.5944	1.42729	0.447397	3.19022	0.00142166	0.00616026
NM_001166493	120.655	1.42428	0.262988	5.41575	6.10321e-08	7.30443e-07
NM_030239	59.9034	1.42398	0.300357	4.74095	2.12722e-06	1.90344e-05
NM_001083935	155.523	1.42371	0.350709	4.05951	4.91756e-05	0.00032745
NM_001083936	154.925	1.42262	0.349986	4.0648	4.80745e-05	0.00032094
NM_001169153	13.2694	1.42254	0.497769	2.85783	0.00426555	0.0154984
NM_145634	13.2694	1.42254	0.497769	2.85783	0.00426555	0.0154984
NM_010484	35.4921	1.42237	0.327022	4.34945	1.36479e-05	0.000103316
NM_001113404	270.458	1.42228	0.2559	5.55795	2.7296e-08	3.43017e-07
NR_015599	87.0735	1.42035	0.248208	5.72241	1.05027e-08	1.42053e-07
NM_001289594	197.564	1.41964	0.295334	4.80688	1.53308e-06	1.41397e-05
NM_001039581	813.765	1.41852	0.178018	7.96836	1.60794e-15	4.91177e-14
NM_013855	813.765	1.41852	0.178018	7.96836	1.60794e-15	4.91177e-14
NM_019413	9045.17	1.41773	0.211983	6.68793	2.26342e-11	4.51123e-10
NM_019549	14.7542	1.41738	0.43162	3.28386	0.00102395	0.0046397
NM_001286654	139.873	1.41684	0.348776	4.06232	4.85873e-05	0.000324086
NM_001301674	42.5273	1.41483	0.3154	4.48583	7.26315e-06	5.76711e-05
NM_011547	42.5273	1.41483	0.3154	4.48583	7.26315e-06	5.76711e-05
NM_030598	139.8	1.41472	0.348722	4.05688	4.97328e-05	0.000330972
NM_001252525	806.671	1.41453	0.201641	7.01508	2.29824e-12	5.06848e-11
NM_001252526	806.671	1.41453	0.201641	7.01508	2.29824e-12	5.06848e-11
NM_007755	806.671	1.41453	0.201641	7.01508	2.29824e-12	5.06848e-11
NM_027308	54.1308	1.41423	0.281351	5.02657	4.99342e-07	5.03625e-06
NM_008746	112.087	1.41417	0.293751	4.81418	1.47806e-06	1.36808e-05
NM_011648	309.888	1.41269	0.264277	5.34548	9.01786e-08	1.0446e-06
NM_001111096	586.649	1.41138	0.307039	4.59675	4.29134e-06	3.56834e-05
NM_010747	586.649	1.41138	0.307039	4.59675	4.29134e-06	3.56834e-05
NM_001193309	765.384	1.41055	0.314565	4.48411	7.32192e-06	5.80962e-05
NM_029413	765.384	1.41055	0.314565	4.48411	7.32192e-06	5.80962e-05
NM_001113563	770.964	1.41012	0.269276	5.23671	1.6346e-07	1.80585e-06
NM_001252533	289.034	1.40943	0.252964	5.57165	2.52333e-08	3.18465e-07
NM_028235	32.0032	1.40871	0.393794	3.57727	0.000347199	0.0018314
NM_018763	38.3943	1.4087	0.325191	4.33192	1.47817e-05	0.000111032
NM_133229	27.4061	1.40865	0.3541	3.97811	6.94654e-05	0.000442412
NM_009808	15.7091	1.40719	0.452439	3.11023	0.00186942	0.00779726
NM_011349	170.986	1.40669	0.30882	4.55506	5.23717e-06	4.28327e-05
NM_001277988	50.6424	1.4053	0.296266	4.74338	2.10183e-06	1.88432e-05
NM_001277989	50.6424	1.4053	0.296266	4.74338	2.10183e-06	1.88432e-05
NM_001302472	50.6424	1.4053	0.296266	4.74338	2.10183e-06	1.88432e-05
NM_008627	50.6424	1.4053	0.296266	4.74338	2.10183e-06	1.88432e-05
NR_102730	50.6424	1.4053	0.296266	4.74338	2.10183e-06	1.88432e-05
NM_017394	9.5625	1.40424	0.532837	2.6354	0.00840379	0.0271228
NM_019950	72.9518	1.40381	0.262801	5.34171	9.20753e-08	1.06499e-06
NM_011415	26.2863	1.40101	0.371166	3.77462	0.000160254	0.000920646
NM_011199	158.612	1.40037	0.354184	3.95379	7.69232e-05	0.000484894
NM_175242	389.705	1.39929	0.21581	6.48388	8.93956e-11	1.65803e-09
NM_001289744	26.4609	1.39892	0.44223	3.16334	0.00155973	0.00668548
NM_178725	26.4609	1.39892	0.44223	3.16334	0.00155973	0.00668548
NM_001162909	1307	1.39806	0.170549	8.19741	2.45613e-16	8.06046e-15
NM_009393	10.9832	1.39738	0.500913	2.78966	0.00527627	0.0184295
NM_177808	13.3766	1.39736	0.460353	3.03541	0.0024021	0.00962484
NM_007488	1282.67	1.39648	0.210275	6.64121	3.11113e-11	6.12256e-10
NM_028089	22.2817	1.39606	0.413871	3.37318	0.000743064	0.0035282
NM_001111331	105.076	1.39482	0.331259	4.21067	2.54616e-05	0.000180977
NM_144862	83.1114	1.39321	0.366124	3.8053	0.000141634	0.000823787
NM_024124	737.444	1.39273	0.211159	6.59562	4.23478e-11	8.22321e-10
NR_102387	1032.36	1.3927	0.319859	4.3541	1.33617e-05	0.000101214
NM_146241	18.4044	1.39242	0.398796	3.49156	0.00048021	0.00242478
NM_153394	84.5205	1.39114	0.26061	5.33801	9.3974e-08	1.08588e-06
NM_026183	58.1911	1.3909	0.314799	4.41838	9.94445e-06	7.72031e-05
NM_025815	1517.27	1.38926	0.255243	5.44291	5.24167e-08	6.35162e-07
NM_001177616	15.4603	1.38897	0.427826	3.24657	0.00116804	0.00520687
NM_011854	159.016	1.3879	0.483292	2.87176	0.00408199	0.0149498
NM_173863	857.985	1.38705	0.210834	6.57887	4.74037e-11	9.14427e-10
NM_028757	471.767	1.38639	0.235041	5.89849	3.66852e-09	5.40552e-08
NM_001252501	110.03	1.38587	0.242403	5.71719	1.08302e-08	1.46145e-07
NM_001033851	466.017	1.38563	0.257462	5.38186	7.37219e-08	8.68153e-07
NM_001289663	19.3787	1.38506	0.444681	3.11474	0.00184109	0.0076928
NM_001289664	19.3787	1.38506	0.444681	3.11474	0.00184109	0.0076928
NM_001289665	19.3787	1.38506	0.444681	3.11474	0.00184109	0.0076928
NM_207258	19.3787	1.38506	0.444681	3.11474	0.00184109	0.0076928
NM_030889	939.354	1.3848	0.226049	6.12612	9.00495e-10	1.4663e-08
NM_001033226	12.9887	1.3829	0.467954	2.95522	0.00312449	0.0119422
NM_021377	109.936	1.38286	0.241889	5.71693	1.08463e-08	1.46278e-07
NM_028472	112.056	1.38263	0.254985	5.42238	5.8812e-08	7.04629e-07
NM_001290356	109.414	1.382	0.241398	5.72498	1.03444e-08	1.40398e-07
NM_001198785	96.0296	1.38185	0.297194	4.64964	3.3251e-06	2.84892e-05
NM_007377	96.0296	1.38185	0.297194	4.64964	3.3251e-06	2.84892e-05
NM_001146710	398.501	1.38084	0.214596	6.4346	1.23797e-10	2.24481e-09
NM_001080743	231.148	1.38075	0.223774	6.17027	6.81736e-10	1.13134e-08
NM_028306	35.1316	1.38009	0.337855	4.08486	4.41032e-05	0.000297484
NM_027864	531.487	1.37992	0.451724	3.05479	0.00225218	0.009086
NM_177702	39.0421	1.37982	0.3545	3.89229	9.93031e-05	0.000605576
NM_001146711	399.32	1.37971	0.214549	6.43077	1.26963e-10	2.29053e-09
NM_001277295	994.157	1.37862	0.319613	4.3134	1.60763e-05	0.000119875
NM_153506	21.9263	1.37696	0.498358	2.76299	0.00572743	0.0197722
NM_001081227	10.4062	1.37483	0.488233	2.81594	0.00486349	0.0172558
NM_177368	1420.36	1.37137	0.187467	7.31526	2.56883e-13	6.24824e-12
NM_030713	598.036	1.37095	0.220074	6.2295	4.67916e-10	7.90524e-09
NM_001080126	270.449	1.37088	0.262149	5.22938	1.70076e-07	1.8754e-06
NM_001277926	270.449	1.37088	0.262149	5.22938	1.70076e-07	1.8754e-06
NR_030692	37.47	1.36941	0.345269	3.96621	7.30236e-05	0.000463308
NM_138682	9.11988	1.36893	0.483113	2.83357	0.00460313	0.0164818
NM_001033464	78.4496	1.36828	0.245728	5.56828	2.57266e-08	3.24516e-07
NM_001290427	59.1412	1.36787	0.302882	4.51617	6.29691e-06	5.0685e-05
NM_001304739	28.0935	1.36741	0.391472	3.49298	0.000477654	0.00241448
NM_001290733	516.912	1.36554	0.279653	4.88298	1.04493e-06	9.93917e-06
NM_001290734	516.912	1.36554	0.279653	4.88298	1.04493e-06	9.93917e-06
NM_145525	516.912	1.36554	0.279653	4.88298	1.04493e-06	9.93917e-06
NM_001163793	148.182	1.36552	0.260575	5.24043	1.60205e-07	1.77073e-06
NM_001161775	73.576	1.36498	0.286005	4.77257	1.81893e-06	1.65222e-05
NM_013607	73.576	1.36498	0.286005	4.77257	1.81893e-06	1.65222e-05
NM_001301301	51.0695	1.36488	0.353491	3.86116	0.000112852	0.000675096
NM_001301308	51.0695	1.36488	0.353491	3.86116	0.000112852	0.000675096
NM_001301309	51.0695	1.36488	0.353491	3.86116	0.000112852	0.000675096
NM_007486	51.0695	1.36488	0.353491	3.86116	0.000112852	0.000675096
NM_020033	10.3549	1.36466	0.485074	2.81331	0.00490339	0.0173577
NM_001291809	32.0683	1.36395	0.363082	3.7566	0.00017224	0.000981787
NM_007882	32.0683	1.36395	0.363082	3.7566	0.00017224	0.000981787
NM_010213	236.902	1.36331	0.277381	4.91495	8.88061e-07	8.55485e-06
NM_001256518	213.716	1.36316	0.207655	6.56456	5.2187e-11	9.97651e-10
NM_133753	3706.37	1.35935	0.246916	5.50533	3.68476e-08	4.54985e-07
NM_010171	718.003	1.3589	0.288699	4.70699	2.51399e-06	2.21646e-05
NM_001199146	617.486	1.35873	0.262902	5.16818	2.36384e-07	2.52911e-06
NM_153410	617.486	1.35873	0.262902	5.16818	2.36384e-07	2.52911e-06
NM_001301305	50.815	1.35814	0.354029	3.83623	0.000124939	0.000738806
NM_172785	36.387	1.35608	0.347761	3.89946	9.64075e-05	0.000590843
NM_175513	97.0527	1.35596	0.344552	3.93544	8.30436e-05	0.000517894
NM_009569	915.699	1.3557	0.27404	4.94708	7.53358e-07	7.34186e-06
NR_033474	14.3323	1.35526	0.477858	2.83612	0.00456656	0.0163759
NM_001205049	12.2749	1.35456	0.452726	2.99201	0.0027715	0.0108272
NM_001277245	12.2749	1.35456	0.452726	2.99201	0.0027715	0.0108272
NM_001277246	12.2749	1.35456	0.452726	2.99201	0.0027715	0.0108272
NM_001277247	12.2749	1.35456	0.452726	2.99201	0.0027715	0.0108272
NM_013455	12.2749	1.35456	0.452726	2.99201	0.0027715	0.0108272
NM_001114088	1853.28	1.35425	0.287731	4.70665	2.51818e-06	2.21932e-05
NR_038022	39.1239	1.3538	0.382497	3.53938	0.000401068	0.00207945
NM_138306	1199.02	1.35366	0.172244	7.85898	3.87264e-15	1.14559e-13
NM_026280	216.275	1.3535	0.240157	5.6359	1.74148e-08	2.27014e-07
NM_009812	332.323	1.35309	0.261214	5.18002	2.21864e-07	2.38575e-06
NM_020296	17659.9	1.35241	0.294963	4.58502	4.53936e-06	3.75987e-05
NM_009755	908.894	1.35042	0.431054	3.13284	0.00173125	0.00730954
NR_033241	908.894	1.35042	0.431054	3.13284	0.00173125	0.00730954
NM_001289738	62.3212	1.3491	0.302311	4.46262	8.09636e-06	6.36368e-05
NM_177656	62.3212	1.3491	0.302311	4.46262	8.09636e-06	6.36368e-05
NR_110367	62.3212	1.3491	0.302311	4.46262	8.09636e-06	6.36368e-05
NR_110368	62.3212	1.3491	0.302311	4.46262	8.09636e-06	6.36368e-05
NM_001114079	73.9599	1.34521	0.265689	5.06311	4.12464e-07	4.23115e-06
NM_001045530	1984.41	1.34493	0.228801	5.87817	4.14834e-09	6.04402e-08
NM_019732	62.2344	1.34429	0.279413	4.81113	1.5008e-06	1.38682e-05
NM_010516	2929.55	1.34392	0.48465	2.77297	0.00555474	0.0192642
NM_183187	15.5647	1.34351	0.464162	2.89449	0.0037978	0.0140365
NR_126479	73.4638	1.34324	0.389482	3.44879	0.000563096	0.00277504
NM_019483	21.7751	1.34302	0.378545	3.54785	0.000388386	0.00202177
NM_025926	165.562	1.34111	0.259712	5.16382	2.41955e-07	2.58163e-06
NM_054049	17.7322	1.34086	0.435786	3.07688	0.00209178	0.00855094
NM_001195816	174.351	1.34004	0.287323	4.66388	3.10297e-06	2.67821e-05
NM_001198787	77.0474	1.33992	0.301552	4.44341	8.85444e-06	6.93623e-05
NM_153143	55.4442	1.33822	0.363219	3.68434	0.000229293	0.00127018
NM_001256516	216.611	1.33801	0.207953	6.43418	1.24141e-10	2.24481e-09
NM_001256517	216.611	1.33801	0.207953	6.43418	1.24141e-10	2.24481e-09
NM_001256519	216.611	1.33801	0.207953	6.43418	1.24141e-10	2.24481e-09
NM_178761	216.611	1.33801	0.207953	6.43418	1.24141e-10	2.24481e-09
NM_178936	59.132	1.33795	0.274072	4.88177	1.05138e-06	9.99644e-06
NM_008875	647.133	1.3368	0.268113	4.98595	6.16577e-07	6.12364e-06
NM_020260	432.699	1.33628	0.284067	4.7041	2.54983e-06	2.24637e-05
NM_001170975	24.3604	1.33611	0.418926	3.18937	0.00142584	0.00617608
NM_028146	24.3604	1.33611	0.418926	3.18937	0.00142584	0.00617608
NM_138649	164.578	1.33592	0.330167	4.04621	5.20542e-05	0.000344072
NR_026733	14.0024	1.33468	0.476848	2.79897	0.00512657	0.0179983
NM_001100460	22.6373	1.334	0.456246	2.92385	0.0034573	0.0129789
NM_011845	265.348	1.3328	0.476986	2.7942	0.00520278	0.0182191
NM_022319	734.192	1.33214	0.255815	5.20745	1.91455e-07	2.09535e-06
NM_009367	1657.7	1.33136	0.425836	3.12647	0.00176921	0.0074403
NM_009635	42.1584	1.33065	0.331997	4.00802	6.12312e-05	0.000398428
NM_177914	103.086	1.33058	0.230563	5.77099	7.88057e-09	1.08982e-07
NM_001277294	2835.81	1.33032	0.306609	4.33883	1.43243e-05	0.000107808
NM_028736	2835.81	1.33032	0.306609	4.33883	1.43243e-05	0.000107808
NM_130891	2835.81	1.33032	0.306609	4.33883	1.43243e-05	0.000107808
NM_001159376	12.9333	1.32963	0.443446	2.99841	0.00271393	0.0106442
NM_175188	328.207	1.32935	0.231222	5.74922	8.96547e-09	1.22602e-07
NM_008029	332.425	1.32834	0.268575	4.94588	7.57993e-07	7.38396e-06
NM_008730	10.8697	1.32827	0.459609	2.89	0.00385242	0.0142114
NM_001079932	29.1366	1.32826	0.34999	3.79512	0.000147571	0.000855766
NM_146191	1177.33	1.32737	0.346888	3.8265	0.00012998	0.000762832
NM_001166372	328.285	1.32686	0.230697	5.75152	8.84445e-09	1.21166e-07
NM_001293784	328.285	1.32686	0.230697	5.75152	8.84445e-09	1.21166e-07
NM_008978	49.9032	1.32681	0.296123	4.48059	7.44373e-06	5.89826e-05
NM_153060	55.7134	1.32612	0.306106	4.33223	1.47609e-05	0.000110915
NM_011834	18.4676	1.32588	0.382701	3.46454	0.000531145	0.00263814
NM_013886	1230.17	1.32551	0.179514	7.38384	1.53787e-13	3.81194e-12
NM_007388	36.4164	1.32548	0.357497	3.70768	0.000209167	0.00116921
NR_034155	45.8399	1.32479	0.356138	3.71989	0.000199313	0.00111813
NM_028263	22.0858	1.32464	0.388543	3.40925	0.000651419	0.00314474
NM_009621	195.778	1.32122	0.309989	4.26216	2.02459e-05	0.000146985
NM_001122948	38.869	1.31768	0.321636	4.09681	4.18883e-05	0.000283279
NM_027402	19.0126	1.31724	0.457798	2.87734	0.00401039	0.014732
NM_011770	2171.19	1.31632	0.30835	4.26891	1.9643e-05	0.000143186
NM_181397	1287.69	1.31579	0.228146	5.76735	8.05286e-09	1.11102e-07
NM_177290	479.588	1.31578	0.229904	5.72319	1.04541e-08	1.41561e-07
NM_028326	3146.12	1.31479	0.191599	6.86223	6.77925e-12	1.43425e-10
NM_027147	16.0679	1.31408	0.429348	3.06065	0.0022086	0.00894336
NM_133903	15.9191	1.31288	0.428349	3.06499	0.0021768	0.00883827
NM_176973	64.9927	1.31277	0.305245	4.30072	1.70247e-05	0.000125905
NM_011904	37.9503	1.31218	0.325759	4.02806	5.62379e-05	0.000369009
NM_001081277	151.493	1.31201	0.292109	4.49152	7.07171e-06	5.63401e-05
NM_001113529	450.846	1.31117	0.47908	2.73685	0.00620302	0.0210774
NM_007778	450.846	1.31117	0.47908	2.73685	0.00620302	0.0210774
NM_028176	63.2426	1.31098	0.433987	3.02078	0.00252121	0.0100193
NM_001142948	290.391	1.31069	0.26284	4.98664	6.14396e-07	6.10716e-06
NM_175170	290.391	1.31069	0.26284	4.98664	6.14396e-07	6.10716e-06
NM_182809	100.428	1.3101	0.308813	4.24239	2.21155e-05	0.000159216
NM_001277293	11606.2	1.3086	0.279757	4.67765	2.90177e-06	2.52599e-05
NM_207649	525.648	1.30819	0.317046	4.12617	3.68851e-05	0.000252361
NM_175096	28.9371	1.30725	0.448018	2.91785	0.00352455	0.0131848
NM_001277292	11568	1.30709	0.279702	4.67313	2.9664e-06	2.57173e-05
NM_133442	11568	1.30709	0.279702	4.67313	2.9664e-06	2.57173e-05
NM_021339	2025.98	1.30655	0.201845	6.47303	9.60596e-11	1.77274e-09
NM_001113460	1927.99	1.30637	0.233678	5.59049	2.26424e-08	2.87939e-07
NM_001113461	1927.99	1.30637	0.233678	5.59049	2.26424e-08	2.87939e-07
NM_001113464	1927.99	1.30637	0.233678	5.59049	2.26424e-08	2.87939e-07
NM_013689	1927.99	1.30637	0.233678	5.59049	2.26424e-08	2.87939e-07
NM_024228	52.9169	1.30629	0.373449	3.49792	0.00046891	0.00237438
NR_040279	42.7999	1.30591	0.425716	3.06756	0.00215814	0.0087736
NM_001310469	106.782	1.30533	0.259704	5.02621	5.00265e-07	5.04121e-06
NM_011019	106.782	1.30533	0.259704	5.02621	5.00265e-07	5.04121e-06
NM_001286653	518.549	1.3052	0.319174	4.08931	4.32663e-05	0.00029226
NM_028937	226.039	1.30463	0.198852	6.56078	5.35258e-11	1.01991e-09
NM_001271386	2964.58	1.3046	0.201151	6.48569	8.8327e-11	1.64029e-09
NM_152804	1700.72	1.30417	0.271563	4.80245	1.56733e-06	1.44045e-05
NM_001253890	279.068	1.30364	0.28268	4.6117	3.99395e-06	3.34363e-05
NM_008923	279.068	1.30364	0.28268	4.6117	3.99395e-06	3.34363e-05
NM_001081023	18.587	1.30193	0.414241	3.14292	0.0016727	0.00709564
NM_014193	18.587	1.30193	0.414241	3.14292	0.0016727	0.00709564
NM_007557	958.531	1.30158	0.253534	5.13376	2.84004e-07	2.99478e-06
NM_001242349	202.957	1.30136	0.219143	5.93841	2.87808e-09	4.31693e-08
NM_178642	202.957	1.30136	0.219143	5.93841	2.87808e-09	4.31693e-08
NR_015610	42.3983	1.30087	0.274343	4.74175	2.11885e-06	1.89667e-05
NM_010272	121.72	1.29976	0.277843	4.67805	2.89618e-06	2.52394e-05
NM_016798	314.488	1.29891	0.363844	3.56996	0.000357042	0.00187571
NM_153107	388.136	1.29837	0.245946	5.27907	1.29838e-07	1.46202e-06
NM_001164155	3170.4	1.29786	0.274482	4.72839	2.26307e-06	2.01115e-05
NM_175643	391.928	1.29779	0.249738	5.19659	2.0298e-07	2.20908e-06
NM_016695	157.971	1.29762	0.281915	4.60288	4.16698e-06	3.47977e-05
NM_177863	70.4647	1.29757	0.258271	5.02406	5.05898e-07	5.09579e-06
NM_001277305	381.225	1.29672	0.247944	5.22989	1.6961e-07	1.87204e-06
NM_001037764	4248.62	1.29573	0.232177	5.58077	2.39462e-08	3.02968e-07
NM_001005748	18.7578	1.29551	0.41418	3.12788	0.00176069	0.00741379
NM_175483	193.467	1.2948	0.298174	4.34243	1.40913e-05	0.000106191
NM_001164056	866.234	1.29459	0.271838	4.76236	1.91341e-06	1.73199e-05
NM_016794	59.7585	1.29381	0.27348	4.73092	2.23505e-06	1.99094e-05
NM_001199147	535.104	1.29286	0.256681	5.03683	4.73307e-07	4.80474e-06
NM_178884	476.524	1.29249	0.245309	5.26885	1.37283e-07	1.53918e-06
NM_199473	28.4744	1.29176	0.394051	3.27815	0.00104489	0.00472087
NM_001301303	45.4751	1.2914	0.35363	3.65184	0.000260366	0.00142577
NM_001081306	331.209	1.29115	0.181449	7.11579	1.11272e-12	2.53768e-11
NM_001311064	331.209	1.29115	0.181449	7.11579	1.11272e-12	2.53768e-11
NM_028672	111.388	1.29111	0.233425	5.53115	3.18142e-08	3.96813e-07
NM_019723	222.546	1.28969	0.303217	4.25334	2.10605e-05	0.000152238
NM_011894	493.131	1.28677	0.212855	6.04526	1.4917e-09	2.31307e-08
NM_013891	20.5381	1.28563	0.434133	2.96137	0.0030627	0.0117501
NR_110496	33.2239	1.28555	0.381909	3.36611	0.000762352	0.00361007
NM_001254747	339.466	1.28462	0.22977	5.59087	2.25934e-08	2.87939e-07
NM_008357	339.466	1.28462	0.22977	5.59087	2.25934e-08	2.87939e-07
NM_026268	1702.3	1.28448	0.247916	5.1811	2.20581e-07	2.37305e-06
NM_170671	25.4953	1.28429	0.449955	2.85426	0.00431366	0.0156541
NM_013900	25.8109	1.28377	0.369093	3.47817	0.000504853	0.0025247
NM_015814	166.982	1.28366	0.236619	5.42501	5.79502e-08	6.96444e-07
NM_010264	15274.4	1.28162	0.273979	4.6778	2.89965e-06	2.52508e-05
NR_033220	640.721	1.28152	0.20524	6.24402	4.26473e-10	7.24168e-09
NR_105772	48.7516	1.27929	0.292057	4.38027	1.1853e-05	9.06366e-05
NM_013869	3440.38	1.27717	0.27537	4.638	3.51801e-06	2.9912e-05
NM_001177887	13.859	1.27593	0.439644	2.90219	0.00370564	0.0137283
NM_028078	13.859	1.27593	0.439644	2.90219	0.00370564	0.0137283
NM_172152	21.1753	1.27517	0.413847	3.08127	0.00206119	0.00844064
NM_009396	8.8654	1.27506	0.50318	2.53401	0.0112765	0.0344238
NR_102393	81.3676	1.27415	0.24524	5.19555	2.04118e-07	2.2194e-06
NM_029658	65.5227	1.27412	0.289312	4.40398	1.06282e-05	8.19674e-05
NM_178406	98.7362	1.27277	0.365684	3.48052	0.00050045	0.00250643
NM_001110240	50.3719	1.27229	0.312989	4.06497	4.8039e-05	0.000320795
NM_178242	1781.41	1.27132	0.203165	6.25759	3.90975e-10	6.66309e-09
NM_016753	68.6221	1.27109	0.26542	4.78898	1.67634e-06	1.53221e-05
NM_025728	53.9507	1.26932	0.319588	3.97173	7.13514e-05	0.000453559
NM_172466	55.4242	1.269	0.325257	3.90153	9.55854e-05	0.000586112
NM_171824	1119.66	1.26805	0.23428	5.41253	6.21392e-08	7.40323e-07
NM_009931	2632.45	1.26673	0.287269	4.40957	1.03575e-05	8.00646e-05
NM_016894	21.8002	1.26631	0.402187	3.14856	0.00164078	0.00697034
NM_029372	36.2398	1.26584	0.419539	3.01723	0.00255099	0.0101051
NM_001170976	26.583	1.26583	0.41169	3.07471	0.00210709	0.00859942
NM_001042726	10.0649	1.26503	0.516271	2.45033	0.0142727	0.0419557
NM_021543	10.0649	1.26503	0.516271	2.45033	0.0142727	0.0419557
NM_007802	70.4907	1.26421	0.296467	4.26426	2.00562e-05	0.000145829
NM_027587	13.4915	1.26419	0.467542	2.70391	0.00685288	0.0229133
NM_148945	4560.37	1.26409	0.186504	6.77782	1.21999e-11	2.50408e-10
NM_001291156	18.058	1.26348	0.406905	3.1051	0.00190218	0.00790569
NM_027249	18.058	1.26348	0.406905	3.1051	0.00190218	0.00790569
NM_177793	120.078	1.26269	0.315268	4.00512	6.19864e-05	0.000402447
NM_001163136	67.007	1.26257	0.409232	3.08521	0.00203406	0.00834558
NM_001168498	100.273	1.26246	0.233224	5.41309	6.19455e-08	7.3868e-07
NM_001243305	100.273	1.26246	0.233224	5.41309	6.19455e-08	7.3868e-07
NM_181047	100.273	1.26246	0.233224	5.41309	6.19455e-08	7.3868e-07
NM_145136	114.841	1.26221	0.333996	3.77911	0.000157393	0.000906208
NM_146386	114.841	1.26221	0.333996	3.77911	0.000157393	0.000906208
NM_001126338	30.9584	1.26211	0.381276	3.31021	0.000932247	0.00429826
NM_001278257	30.9584	1.26211	0.381276	3.31021	0.000932247	0.00429826
NM_023043	30.9584	1.26211	0.381276	3.31021	0.000932247	0.00429826
NM_010019	146.734	1.26162	0.248467	5.07763	3.82177e-07	3.94119e-06
NM_001290717	37.8279	1.26125	0.324362	3.88841	0.000100902	0.000612243
NM_001290718	37.8279	1.26125	0.324362	3.88841	0.000100902	0.000612243
NM_013757	37.8279	1.26125	0.324362	3.88841	0.000100902	0.000612243
NM_001111015	89.8723	1.26031	0.304068	4.14484	3.4005e-05	0.000234646
NR_027376	16.0821	1.25996	0.427092	2.95009	0.00317678	0.0120907
NM_011383	27.7543	1.25956	0.419577	3.00197	0.00268242	0.0105471
NM_182841	88.4747	1.25881	0.277272	4.53997	5.6263e-06	4.57594e-05
NM_001277216	704.556	1.25853	0.185213	6.79503	1.08289e-11	2.23051e-10
NM_001277217	704.556	1.25853	0.185213	6.79503	1.08289e-11	2.23051e-10
NM_007552	116.722	1.25802	0.276296	4.55318	5.28414e-06	4.31717e-05
NM_013605	20.8931	1.25775	0.383461	3.28	0.00103807	0.0046928
NM_009398	129.382	1.25761	0.283385	4.43783	9.08713e-06	7.09476e-05
NM_001114087	906.533	1.25699	0.313785	4.0059	6.17814e-05	0.000401228
NM_026131	906.533	1.25699	0.313785	4.0059	6.17814e-05	0.000401228
NR_104287	906.533	1.25699	0.313785	4.0059	6.17814e-05	0.000401228
NM_001122730	2531.45	1.25696	0.206969	6.07317	1.25408e-09	1.98137e-08
NM_007734	31.708	1.25585	0.407693	3.08038	0.00206734	0.00846139
NM_027937	38.0378	1.25537	0.401743	3.12481	0.00177923	0.00747963
NM_001310719	1477.23	1.25523	0.219097	5.72912	1.00951e-08	1.37255e-07
NM_177751	1477.23	1.25523	0.219097	5.72912	1.00951e-08	1.37255e-07
NR_033388	63.2474	1.25498	0.313129	4.00785	6.1273e-05	0.00039859
NM_031382	46.8047	1.25491	0.379268	3.30876	0.0009371	0.00431468
NM_172426	51.3045	1.25396	0.308246	4.06806	4.74069e-05	0.000317041
NM_001310679	338.381	1.25388	0.253284	4.9505	7.40217e-07	7.21681e-06
NM_153782	31.1639	1.25189	0.373467	3.35207	0.000802105	0.00377331
NM_001271859	17.0343	1.25008	0.421779	2.96383	0.00303837	0.0116664
NM_013458	17.0343	1.25008	0.421779	2.96383	0.00303837	0.0116664
NM_001130174	19.2747	1.24952	0.453492	2.75533	0.00586336	0.0201434
NM_001130175	19.2747	1.24952	0.453492	2.75533	0.00586336	0.0201434
NM_001130177	19.2747	1.24952	0.453492	2.75533	0.00586336	0.0201434
NM_001130178	19.2747	1.24952	0.453492	2.75533	0.00586336	0.0201434
NM_001130179	19.2747	1.24952	0.453492	2.75533	0.00586336	0.0201434
NM_001130180	19.2747	1.24952	0.453492	2.75533	0.00586336	0.0201434
NM_001130181	19.2747	1.24952	0.453492	2.75533	0.00586336	0.0201434
NM_011619	19.2747	1.24952	0.453492	2.75533	0.00586336	0.0201434
NM_001285956	65.7138	1.24946	0.299841	4.16707	3.08545e-05	0.000215191
NM_019651	1356.57	1.2492	0.185767	6.72457	1.76111e-11	3.54824e-10
NM_172715	1364.62	1.24917	0.249698	5.00274	5.65213e-07	5.64948e-06
NM_001310516	48.4559	1.2474	0.333452	3.74088	0.000183376	0.00103944
NM_001081235	189.307	1.24725	0.189879	6.56868	5.07621e-11	9.73592e-10
NM_178705	71.3136	1.24636	0.27834	4.47782	7.5409e-06	5.96315e-05
NM_009021	6434.46	1.24636	0.225439	5.52857	3.22851e-08	4.02044e-07
NM_001037098	288.092	1.24607	0.181269	6.87413	6.23693e-12	1.3219e-10
NR_038005	331.419	1.24481	0.261786	4.75508	1.98364e-06	1.7914e-05
NM_001142336	33.5125	1.2448	0.330854	3.76239	0.0001683	0.000960972
NM_134029	450.586	1.24402	0.145123	8.57218	1.01544e-17	3.80428e-16
NM_001170401	83.486	1.24308	0.268206	4.63478	3.57315e-06	3.03147e-05
NM_172777	66.8206	1.24274	0.372621	3.33512	0.000852637	0.00397982
NM_008551	2541.7	1.242	0.205539	6.04266	1.51598e-09	2.34761e-08
NM_001278520	30.6704	1.24168	0.380931	3.25958	0.00111575	0.00499953
NM_053008	10.6561	1.24143	0.486914	2.54959	0.0107851	0.0331661
NM_007437	710.192	1.24105	0.18084	6.86267	6.75868e-12	1.43119e-10
NR_040588	22.7023	1.24088	0.459015	2.70335	0.00686438	0.0229424
NM_029254	67.467	1.24006	0.281101	4.41144	1.02685e-05	7.94812e-05
NM_001112723	1410.07	1.23919	0.209683	5.90982	3.42475e-09	5.05588e-08
NM_172415	1410.07	1.23919	0.209683	5.90982	3.42475e-09	5.05588e-08
NM_001114312	711.47	1.23917	0.224228	5.52638	3.26906e-08	4.0666e-07
NM_175172	711.47	1.23917	0.224228	5.52638	3.26906e-08	4.0666e-07
NM_011215	675.116	1.239	0.219406	5.64704	1.63233e-08	2.14337e-07
NM_183138	1173.09	1.23894	0.208413	5.94464	2.77064e-09	4.16379e-08
NM_008586	575.612	1.2389	0.177531	6.97851	2.98321e-12	6.49945e-11
NM_001112722	1421.9	1.2389	0.210127	5.89596	3.72498e-09	5.48182e-08
NM_001290803	1421.9	1.2389	0.210127	5.89596	3.72498e-09	5.48182e-08
NM_001102405	50.5656	1.23831	0.332312	3.72634	0.000194277	0.00109329
NM_001141931	14280.9	1.23728	0.291782	4.24042	2.23102e-05	0.00016038
NM_001141932	14280.9	1.23728	0.291782	4.24042	2.23102e-05	0.00016038
NM_183427	27.2206	1.23671	0.372393	3.32099	0.000896997	0.00416363
NM_022027	281.203	1.23644	0.238415	5.18606	2.14795e-07	2.31826e-06
NM_026418	67.168	1.23642	0.273892	4.51425	6.35423e-06	5.11112e-05
[truncated: 21,402 more rows]

## Sheet: 3. Expression RA_TAMvsUNT
	baseMean	log2FoldChange	lfcSE	stat	pvalue	padj
NM_175499	9.12815	-2.83071	0.540059	-5.24149	1.59285e-07	6.31714e-05
NM_010791	96.451	-2.77544	0.552436	-5.024	5.06054e-07	0.000157882
NR_002870	51.0074	-2.57226	0.568003	-4.5286	NA	NA
NM_001135172	28.2398	-2.43906	0.430747	-5.66239	1.49275e-08	1.64088e-05
NM_001033415	34.1246	-2.10986	0.428363	-4.9254	8.41891e-07	0.00022857
NM_010151	83.5323	-1.92104	0.331591	-5.79342	6.89688e-09	8.069e-06
NM_018766	9.04078	-1.91724	0.566882	-3.38208	0.000719389	0.0225341
NM_198962	10.2074	-1.91659	0.483785	-3.96166	7.44309e-05	0.0049198
NM_021416	67.7429	-1.88771	0.303981	-6.20995	5.30006e-10	9.86458e-07
NM_001293561	485.161	-1.87996	0.29609	-6.34931	2.16283e-10	5.62311e-07
NM_009472	485.161	-1.87996	0.29609	-6.34931	2.16283e-10	5.62311e-07
NM_015770	22.3565	-1.87046	0.437597	-4.27438	1.91667e-05	0.00214542
NM_145584	124.488	-1.84837	0.332857	-5.55305	2.80725e-08	1.94361e-05
NM_001010941	9.56997	-1.83042	0.502084	-3.64564	0.000266729	0.0119334
NM_001034013	550.115	-1.82136	0.332073	-5.4848	4.13932e-08	2.47373e-05
NM_001199556	13.1956	-1.81045	0.48987	-3.69577	0.00021922	0.0104259
NM_178737	13.1956	-1.81045	0.48987	-3.69577	0.00021922	0.0104259
NM_008973	406.239	-1.76354	0.295757	-5.9628	2.47946e-09	3.8678e-06
NM_009369	117.455	-1.72431	0.333735	-5.1667	2.3826e-07	8.44703e-05
NM_007384	521.565	-1.70989	0.438293	-3.90125	9.56979e-05	0.00593961
NM_001077398	68.4251	-1.68945	0.405658	-4.16472	3.11731e-05	0.00274218
NM_001286348	68.4251	-1.68945	0.405658	-4.16472	3.11731e-05	0.00274218
NM_010698	68.4251	-1.68945	0.405658	-4.16472	3.11731e-05	0.00274218
NM_008151	8.06345	-1.67149	0.519089	-3.22004	0.00128174	0.0329214
NM_024449	6.42853	-1.63322	0.5572	-2.93111	0.00337748	0.0608039
NM_023137	25.3249	-1.63055	0.451968	-3.60768	0.000308948	0.0131037
NM_024474	159.692	-1.62417	0.321079	-5.05848	4.22602e-07	0.000139274
NM_017383	19.9094	-1.61064	0.423226	-3.80563	0.000141442	0.00781439
NM_001111275	240.619	-1.60428	0.377587	-4.24877	2.14951e-05	0.0023178
NM_010512	240.619	-1.60428	0.377587	-4.24877	2.14951e-05	0.0023178
NM_001111274	232.271	-1.58678	0.379177	-4.18479	2.85424e-05	0.00260885
NM_001111276	232.271	-1.58678	0.379177	-4.18479	2.85424e-05	0.00260885
NM_007555	108.705	-1.57543	0.521505	-3.02093	0.00251997	0.0500549
NM_001099299	73.7431	-1.55767	0.331083	-4.70478	2.5414e-06	0.000503951
NR_015455	50.5587	-1.54782	0.392197	-3.94655	7.92863e-05	0.00513492
NM_010101	35.8147	-1.54638	0.428177	-3.61154	0.000304386	0.0129497
NM_001110202	25.5976	-1.54596	0.411875	-3.75347	0.000174407	0.0088716
NM_001286387	25.5976	-1.54596	0.411875	-3.75347	0.000174407	0.0088716
NM_001286388	25.5976	-1.54596	0.411875	-3.75347	0.000174407	0.0088716
NM_053167	25.5976	-1.54596	0.411875	-3.75347	0.000174407	0.0088716
NM_184052	191.056	-1.54505	0.384692	-4.01633	5.91122e-05	0.00419142
NR_028311	57.7775	-1.5362	0.335419	-4.57994	4.651e-06	0.000818261
NM_023048	34.8064	-1.53065	0.354697	-4.31536	1.59345e-05	0.00189109
NM_009063	40.7344	-1.52269	0.367998	-4.13776	3.50705e-05	0.00300592
NR_028262	85.9114	-1.51466	0.360158	-4.20555	2.60448e-05	0.00256789
NM_008340	10.7005	-1.50661	0.530362	-2.84071	0.00450129	0.0730414
NM_025817	17.6448	-1.49479	0.446425	-3.34836	0.000812917	0.0240527
NM_144841	65.8993	-1.49071	0.470982	-3.1651	0.00155029	0.0365308
NM_022888	15.5119	-1.48254	0.44328	-3.34449	0.000824339	0.0241314
NM_001289728	32.1051	-1.4797	0.411486	-3.59599	0.000323158	0.0134787
NM_172930	32.1051	-1.4797	0.411486	-3.59599	0.000323158	0.0134787
NM_010332	203.751	-1.47721	0.266068	-5.552	2.82417e-08	1.94361e-05
NM_001289727	32.3445	-1.47496	0.411114	-3.58772	0.000333581	0.013864
NM_029568	15.1859	-1.47258	0.464086	-3.17306	0.00150839	0.0361257
NM_011448	62.4686	-1.46732	0.355334	-4.12943	3.63667e-05	0.003072
NM_013553	19.152	-1.45391	0.372084	-3.90749	9.32592e-05	0.00580365
NM_001008231	107.386	-1.44975	0.3303	-4.3892	1.1377e-05	0.00157591
NM_010517	213.803	-1.43833	0.366018	-3.92968	8.50603e-05	0.00543806
NM_013905	6.91651	-1.4375	0.559804	-2.56786	0.0102328	0.125163
NM_010423	15.5126	-1.4374	0.462977	-3.10469	0.00190479	0.0416154
NM_133918	75.118	-1.41794	0.343134	-4.13231	3.59137e-05	0.00305353
NR_045643	20.159	-1.4066	0.45426	-3.09646	0.00195846	0.0422883
NM_027227	42.5713	-1.40525	0.439473	-3.19757	0.00138589	0.0345352
NM_007482	20.1665	-1.39512	0.482097	-2.89385	0.00380545	0.0653292
NM_001110203	22.3761	-1.39264	0.420786	-3.30962	0.000934216	0.0258877
NM_001286386	22.3761	-1.39264	0.420786	-3.30962	0.000934216	0.0258877
NM_001161431	15.9568	-1.38547	0.424795	-3.26149	0.00110827	0.0293998
NM_173449	13.5934	-1.37708	0.503401	-2.73555	0.00622752	0.0890695
NM_001289706	14.3093	-1.377	0.498257	-2.76363	0.00571616	0.0842269
NM_001289707	14.3093	-1.377	0.498257	-2.76363	0.00571616	0.0842269
NM_001289708	14.3093	-1.377	0.498257	-2.76363	0.00571616	0.0842269
NM_020257	14.3093	-1.377	0.498257	-2.76363	0.00571616	0.0842269
NM_145134	712.349	-1.3619	0.244224	-5.57645	2.45483e-08	1.85711e-05
NM_001243073	431.003	-1.35978	0.276373	-4.92009	8.65035e-07	0.00022857
NM_009152	431.003	-1.35978	0.276373	-4.92009	8.65035e-07	0.00022857
NM_001243072	431.073	-1.35906	0.276086	-4.92261	8.53967e-07	0.00022857
NM_011315	28.6681	-1.35503	0.32936	-4.11412	3.88667e-05	0.00313601
NM_080455	409.092	-1.35455	0.233441	-5.80254	6.53165e-09	8.0439e-06
NM_001136061	26.2735	-1.35325	0.378077	-3.57931	0.000344498	0.0140963
NM_001081220	24.2919	-1.35154	0.403277	-3.35141	0.000804024	0.0239051
NM_001001309	377.846	-1.34889	0.269652	-5.00232	5.66438e-07	0.000163631
NM_001276296	26.1877	-1.34727	0.377386	-3.57	0.000356977	0.0143768
NM_007904	26.1877	-1.34727	0.377386	-3.57	0.000356977	0.0143768
NM_025696	37.5024	-1.34619	0.273665	-4.91911	8.69384e-07	0.00022857
NM_008093	11.1655	-1.33939	0.457365	-2.92849	0.00340615	0.0610731
NM_029584	20.6644	-1.33531	0.461423	-2.8939	0.00380485	0.0653292
NM_175366	82.056	-1.33273	0.328713	-4.0544	5.02628e-05	0.00380615
NM_016854	22.1834	-1.32963	0.445718	-2.98313	0.00285315	0.0542771
NM_177006	53.284	-1.32912	0.313082	-4.24527	2.18329e-05	0.00234343
NM_134032	88.5662	-1.32398	0.308582	-4.29054	1.78239e-05	0.00202457
NM_177753	84.0308	-1.32242	0.378915	-3.49001	0.000483	0.0172793
NM_177794	12.7591	-1.32057	0.443706	-2.97623	0.00291816	0.0550661
NM_009328	151.891	-1.31646	0.320205	-4.1113	3.93437e-05	0.00315524
NM_176807	47.9813	-1.31531	0.377605	-3.48329	0.000495289	0.0175384
NM_001286481	81.7074	-1.30364	0.456944	-2.85297	0.00433132	0.0712218
NM_001286482	81.7074	-1.30364	0.456944	-2.85297	0.00433132	0.0712218
NM_018779	433.867	-1.29495	0.24489	-5.28789	1.23737e-07	5.36169e-05
NM_001286483	74.0514	-1.29208	0.459648	-2.81101	0.00493863	0.077975
NM_011340	51.7785	-1.28434	0.346251	-3.70927	0.000207855	0.0100488
NM_001039365	501.402	-1.28173	0.348798	-3.6747	0.000238131	0.0111216
NR_015560	67.8689	-1.27866	0.279848	-4.56913	4.89749e-06	0.000836469
NM_010391	11.6969	-1.27541	0.507886	-2.51121	0.0120318	0.138755
NM_008266	66.0438	-1.27444	0.291686	-4.3692	1.247e-05	0.00165818
NR_131969	41.0848	-1.26738	0.363052	-3.49092	0.000481364	0.0172793
NM_001305440	314.511	-1.26408	0.258517	-4.88972	1.00979e-06	0.000254066
NM_001305441	314.511	-1.26408	0.258517	-4.88972	1.00979e-06	0.000254066
NM_001305442	314.511	-1.26408	0.258517	-4.88972	1.00979e-06	0.000254066
NM_011896	314.511	-1.26408	0.258517	-4.88972	1.00979e-06	0.000254066
NR_033549	11.525	-1.26151	0.425248	-2.96653	0.00301184	0.0563326
NM_008086	133.887	-1.25549	0.47862	-2.62316	0.00871196	0.112812
NM_008268	17.6458	-1.24064	0.390029	-3.18089	0.00146824	0.0354911
NR_015543	2307.77	-1.23956	0.255991	-4.84223	1.28393e-06	0.000294535
NM_010518	30.9251	-1.23888	0.421504	-2.93919	0.00329069	0.059813
NM_001190703	54.0834	-1.23677	0.283512	-4.36232	1.28692e-05	0.00166368
NM_001190704	54.0834	-1.23677	0.283512	-4.36232	1.28692e-05	0.00166368
NM_001190705	54.0834	-1.23677	0.283512	-4.36232	1.28692e-05	0.00166368
NM_010052	54.0834	-1.23677	0.283512	-4.36232	1.28692e-05	0.00166368
NR_033813	54.0834	-1.23677	0.283512	-4.36232	1.28692e-05	0.00166368
NM_001113559	356.672	-1.22995	0.224402	-5.48102	4.22878e-08	2.47373e-05
NM_001243163	356.672	-1.22995	0.224402	-5.48102	4.22878e-08	2.47373e-05
NM_011444	356.672	-1.22995	0.224402	-5.48102	4.22878e-08	2.47373e-05
NM_001039364	609.705	-1.22833	0.338747	-3.6261	0.000287736	0.0126555
NM_008614	609.705	-1.22833	0.338747	-3.6261	0.000287736	0.0126555
NR_045338	46.1073	-1.22805	0.355693	-3.45256	0.000555287	0.0191076
NR_045339	46.1073	-1.22805	0.355693	-3.45256	0.000555287	0.0191076
NM_011852	16.8861	-1.22471	0.480233	-2.55024	0.0107648	0.129704
NR_126529	16.8861	-1.22471	0.480233	-2.55024	0.0107648	0.129704
NR_036630	13.7605	-1.21526	0.511538	-2.37569	0.0175161	0.173449
NM_177779	7.61383	-1.21481	0.516895	-2.3502	0.0187631	0.181646
NM_011270	72.6229	-1.21383	0.265482	-4.57218	4.82678e-06	0.000830455
NM_001199151	166.615	-1.20896	0.223483	-5.40964	6.31523e-08	3.01572e-05
NM_001199153	166.615	-1.20896	0.223483	-5.40964	6.31523e-08	3.01572e-05
NM_001199154	166.615	-1.20896	0.223483	-5.40964	6.31523e-08	3.01572e-05
NM_026408	166.615	-1.20896	0.223483	-5.40964	6.31523e-08	3.01572e-05
NM_009697	164.361	-1.20496	0.234835	-5.13111	2.88043e-07	9.76801e-05
NM_001253916	21.6569	-1.20481	0.420771	-2.86333	0.0041922	0.0699168
NM_001253917	21.6569	-1.20481	0.420771	-2.86333	0.0041922	0.0699168
NM_019982	21.6569	-1.20481	0.420771	-2.86333	0.0041922	0.0699168
NM_011994	28.2408	-1.19912	0.365685	-3.27911	0.00104133	0.0282016
NM_198863	14.0537	-1.19688	0.433787	-2.75914	0.00579534	0.0847003
NM_001024927	58.1997	-1.1944	0.314214	-3.80122	0.000143986	0.00790878
NM_001081641	58.1997	-1.1944	0.314214	-3.80122	0.000143986	0.00790878
NM_177375	28.0171	-1.19268	0.418302	-2.85124	0.00435496	0.0714598
NM_138682	9.11988	-1.19231	0.47529	-2.5086	0.0121211	0.139646
NM_009259	12.7458	-1.19066	0.51553	-2.30958	0.0209112	0.194953
NM_001177713	343.41	-1.18209	0.312892	-3.77795	0.000158126	0.00842825
NM_011481	10.4177	-1.18169	0.46309	-2.55176	0.0107181	0.129331
NM_175475	343.316	-1.18144	0.313103	-3.77333	0.000161083	0.00854415
NM_177243	63.0312	-1.17655	0.372444	-3.15901	0.00158306	0.0370791
NM_016889	20.8641	-1.17442	0.478455	-2.45461	0.0141038	0.152785
NR_131759	32.5778	-1.17369	0.359895	-3.26119	0.00110945	0.0293998
NM_009437	58.7651	-1.17168	0.369683	-3.16941	0.00152748	0.0362688
NM_013500	53.3006	-1.17041	0.338613	-3.45649	0.000547258	0.0188869
NM_177099	271.349	-1.16869	0.347949	-3.35881	0.000782793	0.0235735
NM_011107	427.629	-1.16859	0.206843	-5.64962	1.60803e-08	1.64088e-05
NM_001168615	13.5817	-1.15993	0.4786	-2.42358	0.0153682	0.160895
NM_145976	13.5817	-1.15993	0.4786	-2.42358	0.0153682	0.160895
NM_172829	122.302	-1.15581	0.265567	-4.35226	1.34743e-05	0.00170425
NM_001284393	7.32934	-1.15297	0.520424	-2.21545	0.0267291	0.224411
NM_023121	7.32934	-1.15297	0.520424	-2.21545	0.0267291	0.224411
NM_001038664	7.06027	-1.15028	0.52314	-2.1988	0.0278923	0.22868
NM_009866	461.102	-1.14841	0.262743	-4.37084	1.23771e-05	0.00165818
NM_134005	1960.84	-1.14272	0.271891	-4.20286	2.63558e-05	0.00256789
NR_015462	163.586	-1.14139	0.2642	-4.32016	1.55917e-05	0.00186138
NM_053015	22.2938	-1.13932	0.429162	-2.65475	0.0079367	0.105398
NM_183261	190.07	-1.13758	0.226821	-5.01531	5.29481e-07	0.000159925
NR_046081	50.8229	-1.13723	0.341716	-3.32801	0.000874701	0.0248992
NR_110337	14.7556	-1.13522	0.505622	-2.2452	0.0247551	0.215986
NM_171824	1119.66	-1.13451	0.233985	-4.84866	1.243e-06	0.000292865
NM_013486	21.7069	-1.12141	0.484232	-2.31584	0.0205669	0.19348
NM_001163565	7.36055	-1.12076	0.499698	-2.24287	0.0249052	0.216561
NM_013643	7.36055	-1.12076	0.499698	-2.24287	0.0249052	0.216561
NM_008610	183.948	-1.12	0.279522	-4.00685	6.15347e-05	0.00429053
NM_013729	9.84793	-1.11899	0.533279	-2.09832	0.0358768	0.264403
NM_001081351	207.475	-1.11821	0.266488	-4.19609	2.71559e-05	0.00260885
NR_046164	16.0458	-1.11759	0.551103	-2.02791	0.0425692	0.28751
NR_029384	153.842	-1.11552	0.298842	-3.7328	0.000189364	0.00950843
NM_001290814	4743.66	-1.11298	0.221258	-5.03024	4.8987e-07	0.000154898
NM_027941	440.932	-1.11184	0.251937	-4.41318	1.01864e-05	0.00145336
NR_030568	37.6119	-1.11153	0.330698	-3.36116	0.000776156	0.023525
NM_001008423	17.9076	-1.10951	0.380256	-2.91779	0.00352524	0.062387
NM_173379	576.827	-1.10839	0.178637	-6.20469	5.48056e-10	9.86458e-07
NR_015552	22.4266	-1.10785	0.364523	-3.03918	0.00237226	0.0481009
NM_175034	21.9985	-1.10722	0.422353	-2.62155	0.00875298	0.112843
NM_013788	40.171	-1.10699	0.369276	-2.99774	0.00271986	0.0521656
NM_010808	21.5923	-1.10361	0.431326	-2.55865	0.010508	0.127397
NM_001304439	127.817	-1.09945	0.275633	-3.98884	6.63983e-05	0.00452346
NM_153778	44.9567	-1.09938	0.335649	-3.27538	0.0010552	0.0284645
NM_001173506	52.2334	-1.0988	0.382969	-2.86917	0.00411555	0.0695305
NM_001271472	328.765	-1.09843	0.209335	-5.24725	1.54385e-07	6.22838e-05
NM_001271473	328.765	-1.09843	0.209335	-5.24725	1.54385e-07	6.22838e-05
NM_022723	328.765	-1.09843	0.209335	-5.24725	1.54385e-07	6.22838e-05
NM_001031664	40.3785	-1.09756	0.314438	-3.49054	0.000482037	0.0172793
NM_001034881	19.7503	-1.09709	0.432886	-2.53436	0.0112654	0.133265
NM_007666	759.054	-1.09581	0.209968	-5.21895	1.7994e-07	6.90231e-05
NM_001159556	12.9714	-1.09579	0.411969	-2.65989	0.00781672	0.104219
NM_001159557	12.9714	-1.09579	0.411969	-2.65989	0.00781672	0.104219
NM_026253	8.84395	-1.09536	0.569137	-1.9246	0.0542789	0.329517
NM_010458	77.6674	-1.09184	0.297286	-3.6727	0.000240004	0.0111647
NM_010262	56.0526	-1.08997	0.359973	-3.02791	0.0024625	0.0490383
NM_001037810	12.8968	-1.08942	0.511869	-2.12831	0.0333115	0.253142
NM_212483	39.425	-1.0854	0.43443	-2.49845	0.0124737	0.141754
NM_144795	88.7043	-1.0854	0.363739	-2.984	0.00284504	0.0542553
NM_025451	93.1611	-1.08485	0.240318	-4.51421	6.35521e-06	0.00102286
NR_038008	12.7512	-1.08409	0.488116	-2.22096	0.0263535	0.22318
NR_110450	12.7512	-1.08409	0.488116	-2.22096	0.0263535	0.22318
NM_001310734	26.045	-1.08135	0.468906	-2.30612	0.0211038	0.195413
NM_010287	26.045	-1.08135	0.468906	-2.30612	0.0211038	0.195413
NM_013775	17.6116	-1.08057	0.418722	-2.58064	0.0098617	0.122027
NM_001310635	262.13	-1.07808	0.275103	-3.91881	8.89889e-05	0.00561254
NM_030209	262.13	-1.07808	0.275103	-3.91881	8.89889e-05	0.00561254
NM_001195687	110.34	-1.07581	0.318455	-3.37822	0.000729567	0.0228224
NM_001277268	172.24	-1.07285	0.323707	-3.31428	0.000918796	0.0256857
NM_010203	172.24	-1.07285	0.323707	-3.31428	0.000918796	0.0256857
NM_001080814	1089.6	-1.07041	0.226674	-4.72226	2.33233e-06	0.000466446
NM_001033324	264.374	-1.06961	0.25511	-4.19275	2.75589e-05	0.00260885
NM_010459	131.285	-1.06863	0.280323	-3.81215	0.000137762	0.00765675
NM_010218	51.1714	-1.06718	0.37138	-2.87355	0.00405882	0.0686216
NM_144783	646.3	-1.06609	0.285994	-3.72766	0.000193265	0.00958799
NM_172800	773.473	-1.0643	0.275368	-3.86501	0.000111087	0.00671658
NM_001102607	28.834	-1.0629	0.383469	-2.77179	0.00557495	0.0831941
NM_032393	62.9804	-1.06283	0.35694	-2.97762	0.00290496	0.0549522
NM_018863	19.8742	-1.06159	0.501707	-2.11596	0.0343486	0.257686
NR_004853	14.6775	-1.06003	0.44264	-2.39479	0.01663	0.168162
NM_008964	27.2472	-1.05876	0.421385	-2.51258	0.0119852	0.138381
NM_001177732	1476.5	-1.05755	0.211022	-5.01155	5.39941e-07	0.000159925
NM_001177733	1476.5	-1.05755	0.211022	-5.01155	5.39941e-07	0.000159925
NM_183191	1476.5	-1.05755	0.211022	-5.01155	5.39941e-07	0.000159925
NM_008289	11.6773	-1.05581	0.460177	-2.29435	0.0217702	0.198582
NM_001042613	57.7541	-1.05493	0.315132	-3.3476	0.000815153	0.0240527
NM_001042614	57.7541	-1.05493	0.315132	-3.3476	0.000815153	0.0240527
NM_009155	57.7541	-1.05493	0.315132	-3.3476	0.000815153	0.0240527
NM_001170935	48.1917	-1.05111	0.322449	-3.25977	0.00111503	0.029481
NM_001285457	366.811	-1.04821	0.251041	-4.17545	2.97401e-05	0.00267243
NM_010279	366.811	-1.04821	0.251041	-4.17545	2.97401e-05	0.00267243
NR_104342	366.811	-1.04821	0.251041	-4.17545	2.97401e-05	0.00267243
NM_011374	396.192	-1.04762	0.264796	-3.95631	7.61177e-05	0.00501712
NM_172418	9.67848	-1.04689	0.489446	-2.13894	0.0324407	0.248146
NM_008278	80.126	-1.04568	0.377728	-2.76834	0.00563419	0.0836229
NM_001168588	51.2951	-1.04428	0.441119	-2.36735	0.0179161	0.175817
NM_001039484	59.1771	-1.04412	0.301215	-3.46637	0.000527532	0.0183141
NM_011397	231.878	-1.04238	0.307017	-3.39518	0.000685831	0.0221654
NR_130160	123.106	-1.04173	0.303413	-3.43336	0.00059614	0.0199558
NM_007937	172.378	-1.04136	0.304381	-3.42124	0.000623369	0.0206348
NR_131118	19.3546	-1.04064	0.523286	-1.98867	0.0467382	0.302052
NM_001033776	48.9044	-1.03533	0.447508	-2.31354	0.0206927	0.193976
NM_001252651	14.3709	-1.03102	0.422492	-2.44033	0.0146738	0.156655
NM_007782	14.3709	-1.03102	0.422492	-2.44033	0.0146738	0.156655
NR_045561	14.3709	-1.03102	0.422492	-2.44033	0.0146738	0.156655
NM_001001979	454.55	-1.03096	0.295348	-3.49065	0.000481841	0.0172793
NM_011461	64.2684	-1.03017	0.35324	-2.91635	0.00354152	0.0625891
NM_001190451	35.793	-1.02731	0.347278	-2.95819	0.00309451	0.0571044
NM_001163566	95.1704	-1.02618	0.321897	-3.18792	0.00143302	0.0349283
NM_172430	24.3126	-1.02561	0.353617	-2.90035	0.00372749	0.0643211
NM_172796	22.408	-1.02538	0.458867	-2.2346	0.0254437	0.21848
NM_009574	198.028	-1.01591	0.303732	-3.34475	0.000823578	0.0241314
NM_001033158	26.7742	-1.0136	0.351212	-2.88601	0.00390159	0.0662736
NM_001168589	59.6319	-1.01269	0.43282	-2.33976	0.0192963	0.185198
NM_001167925	13.2942	-1.01266	0.418598	-2.41916	0.0155563	0.161954
NM_173759	13.2942	-1.01266	0.418598	-2.41916	0.0155563	0.161954
NR_033764	13.2942	-1.01266	0.418598	-2.41916	0.0155563	0.161954
NR_033765	13.2942	-1.01266	0.418598	-2.41916	0.0155563	0.161954
NM_001282007	106.449	-1.01059	0.239041	-4.2277	2.36088e-05	0.0024249
NM_001161665	711.107	-1.00952	0.227152	-4.44423	8.82057e-06	0.00128194
NM_001168369	20.0779	-1.0081	0.379166	-2.65873	0.00784349	0.104397
NM_029292	20.0779	-1.0081	0.379166	-2.65873	0.00784349	0.104397
NM_181681	46.0388	-1.00441	0.32865	-3.05616	0.00224193	0.0467549
NR_033210	46.0388	-1.00441	0.32865	-3.05616	0.00224193	0.0467549
NM_011569	107.928	-1.00398	0.236709	-4.24142	2.22108e-05	0.0023731
NM_178394	266.39	-1.00265	0.313375	-3.19951	0.00137661	0.034377
NM_001282006	109.58	-1.00216	0.235623	-4.25322	2.10716e-05	0.00229328
NM_013622	91.5455	-1.00104	0.290865	-3.44161	0.000578272	0.0196596
NM_145211	19.6749	-0.999262	0.467158	-2.13902	0.0324339	0.248146
NM_001079869	649.984	-0.998013	0.220612	-4.52385	6.07259e-06	0.00100065
NM_001290510	97.2508	-0.994645	0.334551	-2.97308	0.0029483	0.0554114
NM_010169	761.099	-0.990055	0.185746	-5.33015	9.81337e-08	4.59246e-05
NM_001193274	11.3142	-0.989411	0.464334	-2.13082	0.033104	0.251956
NM_183143	11.3142	-0.989411	0.464334	-2.13082	0.033104	0.251956
NM_001286081	29.4624	-0.989186	0.346768	-2.85259	0.00433649	0.0712433
NM_138673	34.8943	-0.988296	0.363369	-2.71982	0.00653183	0.0919052
NM_010471	28.3604	-0.986012	0.346708	-2.84393	0.00445609	0.0725835
NM_177897	321.131	-0.985508	0.3171	-3.10788	0.00188436	0.0412075
NR_131087	443.081	-0.98481	0.323023	-3.04873	0.00229808	0.0473725
NM_001163387	23.0719	-0.983273	0.3597	-2.73359	0.00626482	0.08933
NM_027937	38.0378	-0.982663	0.397268	-2.47356	0.0133776	0.147968
NM_001159638	126.716	-0.982061	0.237179	-4.14058	3.46422e-05	0.00299112
NM_028747	126.716	-0.982061	0.237179	-4.14058	3.46422e-05	0.00299112
NM_001252293	1092.35	-0.980615	0.263756	-3.71788	0.000200901	0.00981395
NM_001252292	1090.55	-0.98008	0.263567	-3.71852	0.000200396	0.00980976
NM_008590	1090.55	-0.98008	0.263567	-3.71852	0.000200396	0.00980976
NM_153166	186.601	-0.97873	0.226104	-4.32868	1.50007e-05	0.00180928
NM_024445	12.4739	-0.978197	0.47263	-2.06969	0.0384815	0.27494
NM_139218	100.325	-0.97806	0.375109	-2.6074	0.00912324	0.116198
NM_172506	604.856	-0.973662	0.215731	-4.51332	6.38221e-06	0.00102286
NM_021287	435.511	-0.96853	0.242845	-3.98826	6.65591e-05	0.00452346
NM_020030	27.4586	-0.968394	0.341516	-2.83557	0.00457437	0.0737161
NM_026929	113.165	-0.965744	0.407437	-2.37029	0.0177741	0.175262
NM_172610	88.974	-0.964805	0.239564	-4.02734	5.64114e-05	0.00407399
NM_001164369	19.0995	-0.964212	0.43736	-2.20462	0.0274808	0.226656
NM_029815	19.0995	-0.964212	0.43736	-2.20462	0.0274808	0.226656
NM_177863	70.4647	-0.96406	0.25148	-3.83354	0.000126312	0.00726022
NR_131929	249.706	-0.963774	0.216612	-4.44932	8.61433e-06	0.00126771
NM_145066	32.48	-0.963319	0.399747	-2.40982	0.0159604	0.164146
NR_131137	13.3571	-0.962717	0.454666	-2.11741	0.0342248	0.25711
NM_010134	32.2557	-0.96267	0.353644	-2.72214	0.00648601	0.0914805
NR_040340	24.2026	-0.962571	0.355162	-2.71023	0.00672362	0.0939821
NM_198599	18.2542	-0.962039	0.399239	-2.40968	0.0159664	0.164146
NM_011582	31.8614	-0.961659	0.300325	-3.20206	0.0013645	0.0341474
NM_175329	229.7	-0.961465	0.264328	-3.6374	0.000275406	0.0122281
NM_001286502	18.7596	-0.960187	0.509331	-1.88519	0.0594038	0.343887
NR_040725	128.469	-0.957704	0.253879	-3.77228	0.000161762	0.00854415
NM_032398	60.9198	-0.957689	0.284902	-3.36147	0.000775293	0.023525
NM_001286083	26.4505	-0.95747	0.355562	-2.69283	0.0070848	0.0970593
NM_001198914	347.935	-0.953976	0.268513	-3.55281	0.000381138	0.0149887
NM_010848	347.935	-0.953976	0.268513	-3.55281	0.000381138	0.0149887
NM_026668	98.0305	-0.952941	0.33006	-2.88718	0.00388717	0.0662736
NM_001130419	28.8548	-0.952074	0.342582	-2.77912	0.00545072	0.0819149
NM_027872	54.2732	-0.951364	0.338757	-2.8084	0.00497888	0.0781885
NM_001302179	79.114	-0.95043	0.287107	-3.31037	0.000931743	0.0258877
NM_001302183	79.114	-0.95043	0.287107	-3.31037	0.000931743	0.0258877
NM_133659	79.114	-0.95043	0.287107	-3.31037	0.000931743	0.0258877
NM_026820	309.191	-0.950346	0.27325	-3.47793	0.000505293	0.0177795
NM_011377	18.1517	-0.948876	0.369177	-2.57024	0.0101627	0.124632
NM_020581	74.0644	-0.948327	0.318913	-2.97362	0.00294307	0.0553577
NM_001014761	30.0294	-0.94783	0.400301	-2.36779	0.0178946	0.175709
NM_029999	137.238	-0.947421	0.271868	-3.48485	0.000492405	0.0175008
NM_001162923	28.3017	-0.94652	0.337803	-2.80199	0.0050789	0.0791317
NM_001177995	547.389	-0.946312	0.31127	-3.04016	0.0023645	0.0480268
NM_001291026	547.389	-0.946312	0.31127	-3.04016	0.0023645	0.0480268
NM_001291029	547.389	-0.946312	0.31127	-3.04016	0.0023645	0.0480268
NM_027504	547.389	-0.946312	0.31127	-3.04016	0.0023645	0.0480268
NM_001168657	488.744	-0.944078	0.278627	-3.38833	0.000703204	0.0224173
NM_145365	8.08674	-0.943618	0.548016	-1.72188	0.0850911	0.41308
NM_001302153	41.4525	-0.942965	0.34019	-2.77187	0.00557346	0.0831941
NM_001302154	41.4525	-0.942965	0.34019	-2.77187	0.00557346	0.0831941
NM_007903	17.9121	-0.941033	0.437896	-2.14899	0.0316352	0.244679
NM_019459	947.496	-0.935214	0.272607	-3.43063	0.00060219	0.0201008
NM_013533	10.8258	-0.934279	0.501473	-1.86307	0.0624523	0.350847
NM_001168656	498.516	-0.933555	0.279655	-3.33824	0.000843105	0.0244156
NR_033482	15.927	-0.932884	0.487993	-1.91168	0.0559178	0.333866
NM_001164786	39.268	-0.928157	0.311169	-2.98281	0.00285617	0.0542904
NR_045052	21.7489	-0.927583	0.526231	-1.76269	0.0779526	0.395065
NM_011990	56.8215	-0.927006	0.45693	-2.02877	NA	NA
NM_148944	31.0327	-0.925791	0.373812	-2.47662	0.0132632	0.146874
NM_001302152	105.048	-0.921855	0.266584	-3.45803	0.000544141	0.018807
NM_010246	16.0326	-0.921272	0.46807	-1.96823	0.0490412	0.311715
NM_175651	426.803	-0.921128	0.268699	-3.42811	0.000607809	0.0202306
NM_007833	32.4394	-0.920748	0.346652	-2.65611	0.00790471	0.105033
NM_001291010	16.1906	-0.919268	0.470076	-1.95557	0.0505153	0.317213
NM_019741	42.553	-0.919049	0.32439	-2.83316	0.004609	0.0741719
NM_001083894	310.7	-0.916292	0.24326	-3.76672	0.000165404	0.00862715
NM_001289581	310.7	-0.916292	0.24326	-3.76672	0.000165404	0.00862715
NM_001289582	310.7	-0.916292	0.24326	-3.76672	0.000165404	0.00862715
NM_153404	310.7	-0.916292	0.24326	-3.76672	0.000165404	0.00862715
NM_007909	48.7188	-0.916146	0.310441	-2.95111	0.00316632	0.0579723
NM_026778	104.421	-0.915385	0.332186	-2.75564	0.00585779	0.0851873
NM_011169	267.902	-0.913698	0.275362	-3.31817	0.000906095	0.0254522
NM_011658	26.2394	-0.912798	0.327596	-2.78636	0.00533041	0.0812564
NM_145711	677.214	-0.911358	0.222423	-4.09741	4.1779e-05	0.00330265
NM_007706	534.544	-0.910957	0.274974	-3.31288	0.000923404	0.0257837
NM_026516	46.1723	-0.91087	0.270002	-3.37356	0.00074202	0.0230885
NM_001081358	173.288	-0.910196	0.209596	-4.34262	1.40795e-05	0.0017431
NM_001291452	173.288	-0.910196	0.209596	-4.34262	1.40795e-05	0.0017431
NM_001291453	173.288	-0.910196	0.209596	-4.34262	1.40795e-05	0.0017431
NM_177431	67.8126	-0.908535	0.269644	-3.36939	0.000753357	0.0231687
NM_010320	19.3238	-0.907792	0.368828	-2.46129	0.013844	0.150808
NM_001104614	15.0523	-0.90706	0.516928	-1.75471	0.0793087	0.398827
NM_008452	745.999	-0.906347	0.298448	-3.03687	0.00239047	0.0483863
NM_010292	26.7452	-0.903666	0.369227	-2.44745	0.014387	0.155063
NM_001077406	3383.65	-0.902787	0.287562	-3.13945	0.00169264	0.0385817
NM_001077407	3383.65	-0.902787	0.287562	-3.13945	0.00169264	0.0385817
NM_028973	327.471	-0.902417	0.282114	-3.19876	0.00138019	0.0344296
NM_133204	31.4119	-0.902406	0.385351	-2.34178	0.0191922	0.184502
NM_001168655	520.484	-0.901716	0.275669	-3.27101	0.00107163	0.0286901
NM_177906	188.451	-0.901355	0.230404	-3.91206	9.15136e-05	0.00574082
NM_176921	197.505	-0.899931	0.266088	-3.38208	0.00071939	0.0225341
NM_027073	13.7856	-0.899216	0.462249	-1.94531	0.0517381	0.321181
NR_003188	293.437	-0.898635	0.278308	-3.22892	0.00124258	0.0322697
NM_172898	76.0966	-0.898531	0.355282	-2.52907	0.0114367	0.134679
NM_011443	1285.97	-0.898002	0.301014	-2.98326	0.002852	0.0542771
NM_001289468	130.466	-0.897013	0.317939	-2.82134	0.00478238	0.0762837
NM_001309484	130.466	-0.897013	0.317939	-2.82134	0.00478238	0.0762837
NM_001309485	130.466	-0.897013	0.317939	-2.82134	0.00478238	0.0762837
NM_009337	130.466	-0.897013	0.317939	-2.82134	0.00478238	0.0762837
NR_110339	130.466	-0.897013	0.317939	-2.82134	0.00478238	0.0762837
NM_001164785	66.193	-0.896412	0.27403	-3.27122	0.00107086	0.0286901
NM_007548	562.356	-0.89632	0.262007	-3.42098	0.000623963	0.0206348
NR_029473	13.1937	-0.894826	0.491463	-1.82074	0.0686462	0.36499
NM_018782	127.296	-0.893625	0.322785	-2.76848	0.00563184	0.0836229
NM_001077403	4023.93	-0.892424	0.284324	-3.13875	0.00169668	0.0385817
NM_001077404	4023.93	-0.892424	0.284324	-3.13875	0.00169668	0.0385817
NM_001077405	4023.93	-0.892424	0.284324	-3.13875	0.00169668	0.0385817
NM_010939	4023.93	-0.892424	0.284324	-3.13875	0.00169668	0.0385817
NM_008904	18.2811	-0.892295	0.390091	-2.2874	0.0221723	0.200313
NR_027710	18.2811	-0.892295	0.390091	-2.2874	0.0221723	0.200313
NM_001291145	12.296	-0.892111	0.477363	-1.86883	0.0616464	0.349068
NM_182840	12.296	-0.892111	0.477363	-1.86883	0.0616464	0.349068
NM_001081432	17.7743	-0.891926	0.424749	-2.09989	0.0357385	0.264041
NM_001077425	23.548	-0.891704	0.345885	-2.57804	0.0099363	0.122691
NM_175279	27.2214	-0.891607	0.347075	-2.56892	0.0102016	0.124847
NM_001081178	35.4682	-0.889865	0.308359	-2.88581	0.00390408	0.0662736
NR_028376	46.4227	-0.888741	0.353906	-2.51124	0.0120309	0.138755
NM_029408	11.2312	-0.887883	0.449069	-1.97716	0.0480231	0.307777
NM_019568	28.7707	-0.887489	0.361376	-2.45586	0.0140549	0.152538
NM_001160127	76.5324	-0.886862	0.328501	-2.69972	0.00693979	0.096176
NM_009762	76.5324	-0.886862	0.328501	-2.69972	0.00693979	0.096176
NM_009127	478.92	-0.886749	0.286044	-3.10004	0.00193493	0.0420776
NM_001253782	69.6354	-0.885881	0.328356	-2.69793	0.00697726	0.0963191
NM_172148	35.2411	-0.885371	0.358254	-2.47135	0.0134604	0.148147
NR_015611	14.3065	-0.882551	0.435569	-2.0262	0.0427439	0.288112
NM_133719	72.1384	-0.881507	0.330114	-2.67031	0.00757811	0.10185
NM_177905	23.9817	-0.87777	0.427686	-2.05237	0.0401335	0.279323
NM_007836	320.158	-0.877556	0.283301	-3.09761	0.00195088	0.0422883
NM_001159696	707.581	-0.876576	0.261125	-3.35692	0.000788145	0.0236433
NM_001039047	10.8639	-0.876529	0.431936	-2.0293	0.0424275	0.287136
NM_021390	843.12	-0.87574	0.256013	-3.42069	0.000624632	0.0206348
NM_133229	27.4061	-0.875364	0.340651	-2.56968	0.0101793	0.124661
NM_029416	12.7546	-0.875122	0.484942	-1.80459	0.0711387	0.373977
NM_001253872	45.4707	-0.874274	0.30492	-2.86722	0.00414095	0.0695843
NM_001253873	45.4707	-0.874274	0.30492	-2.86722	0.00414095	0.0695843
NM_001253874	45.4707	-0.874274	0.30492	-2.86722	0.00414095	0.0695843
NM_008400	45.4707	-0.874274	0.30492	-2.86722	0.00414095	0.0695843
NM_001310512	879.599	-0.874151	0.290713	-3.00692	0.00263911	0.0512895
NM_016968	71.9471	-0.874076	0.38612	-2.26374	0.02359	0.208532
NM_007639	15.2107	-0.871794	0.422963	-2.06116	0.0392879	0.277407
NM_009638	141.262	-0.871719	0.328593	-2.65288	0.00798082	0.105924
NM_001310511	855.285	-0.86932	0.297858	-2.91857	0.00351643	0.062387
NM_019724	712.571	-0.868587	0.219804	-3.95164	7.76185e-05	0.00508738
NM_001291045	47.9189	-0.866978	0.293906	-2.94985	0.00317929	0.0581643
NM_023219	27.6362	-0.866095	0.354105	-2.44587	0.0144502	0.15553
NM_145621	54.179	-0.864217	0.422443	-2.04576	0.04078	0.281395
NM_178727	31.1461	-0.864077	0.425944	-2.02862	0.0424974	0.287258
NM_001256050	9.51218	-0.863099	0.49342	-1.74922	0.0802533	0.401764
NM_144852	14.292	-0.862933	0.459975	-1.87604	0.0606495	0.345962
NM_001198811	100.181	-0.862687	0.27864	-3.09606	0.0019611	0.0422883
NM_001033263	14.2845	-0.86145	0.408022	-2.11128	0.034748	0.259049
NM_001301014	14.2845	-0.86145	0.408022	-2.11128	0.034748	0.259049
NM_011437	16.5241	-0.86071	0.488989	-1.76018	0.0783768	0.396099
NM_133721	2843.28	-0.860541	0.228052	-3.77344	0.000161015	0.00854415
NM_177838	70.8993	-0.86032	0.273086	-3.15037	0.00163064	0.037815
NM_008952	210.347	-0.85922	0.274827	-3.12641	0.00176957	0.0396611
NM_028974	13.5793	-0.858045	0.437337	-1.96198	0.0497653	0.314174
NM_022657	11.6578	-0.85734	0.496027	-1.72841	0.0839142	0.409491
NR_045402	98.3551	-0.856998	0.302091	-2.83689	0.00455553	0.0735644
NM_001029868	1236.21	-0.85699	0.221824	-3.86338	0.000111827	0.0067266
NM_001290540	1236.21	-0.85699	0.221824	-3.86338	0.000111827	0.0067266
NM_138666	34.0979	-0.856317	0.301115	-2.84382	0.00445756	0.0725835
NM_001101443	28.0937	-0.854877	0.44772	-1.9094	0.0562103	0.334843
NM_001253781	149.913	-0.854083	0.2906	-2.93903	0.00329241	0.059813
NM_001013385	48.1616	-0.853589	0.292728	-2.91598	0.00354578	0.0626171
NR_038184	65.6296	-0.852914	0.286134	-2.98082	0.0028748	0.0545118
NR_038185	65.6296	-0.852914	0.286134	-2.98082	0.0028748	0.0545118
NM_007758	16.7822	-0.852365	0.412879	-2.06445	0.0389755	0.276696
NM_001276684	93.9829	-0.852205	0.424916	-2.00558	0.0449009	0.295896
NM_018790	93.9829	-0.852205	0.424916	-2.00558	0.0449009	0.295896
NM_172896	54.2051	-0.852009	0.321638	-2.64897	0.00807376	0.106956
NR_029382	1254.76	-0.851749	0.235601	-3.61521	0.000300105	0.0129448
NM_177733	338.807	-0.851376	0.16504	-5.15862	2.48783e-07	8.59351e-05
NM_177811	2240.16	-0.850751	0.262726	-3.23817	0.00120299	0.031416
NM_001128093	20.3158	-0.85018	0.387608	-2.1934	0.0282786	0.230154
NM_010118	58.3814	-0.849242	0.560433	-1.51533	0.129689	0.496172
NR_040589	150.221	-0.84918	0.382735	-2.21872	0.026506	0.223581
NM_033042	14.9344	-0.848703	0.484818	-1.75056	0.0800218	0.401379
NM_011127	105.846	-0.847681	0.26552	-3.19253	0.0014103	0.0347533
NM_175686	105.846	-0.847681	0.26552	-3.19253	0.0014103	0.0347533
NR_033481	14.3437	-0.846193	0.445982	-1.89737	0.0577788	0.340163
NM_001162943	181.822	-0.846086	0.250516	-3.37738	0.000731807	0.0228619
NR_130314	31.0869	-0.845953	0.365967	-2.31155	0.0208023	0.194545
NM_001042726	10.0649	-0.845889	0.50859	-1.66321	0.0962711	0.438635
NM_021543	10.0649	-0.845889	0.50859	-1.66321	0.0962711	0.438635
NM_001024614	147.345	-0.845825	0.26167	-3.23242	0.00122748	0.0319131
NM_178756	336.637	-0.845505	0.20527	-4.11899	3.80537e-05	0.00309923
NM_001145406	7.47778	-0.845039	0.514875	-1.64125	0.100745	0.449469
NM_001163472	14.4914	-0.8449	0.434994	-1.94232	0.0520979	0.322068
NM_019823	14.4914	-0.8449	0.434994	-1.94232	0.0520979	0.322068
NR_045850	68.5331	-0.843793	0.251579	-3.35399	0.00079656	0.0237921
NM_018801	239.288	-0.843619	0.237581	-3.55086	0.000383971	0.0149992
NM_173067	239.288	-0.843619	0.237581	-3.55086	0.000383971	0.0149992
NM_173068	239.288	-0.843619	0.237581	-3.55086	0.000383971	0.0149992
NR_015485	99.9722	-0.843577	0.264549	-3.18873	0.00142899	0.0348796
NM_009335	781.929	-0.843236	0.257085	-3.27999	0.00103811	0.0281636
NR_045195	98.0124	-0.842988	0.296719	-2.84103	0.00449678	0.0730188
NM_001199224	37.6485	-0.842842	0.327992	-2.5697	0.0101786	0.124661
NM_001291009	118.662	-0.841256	0.336332	-2.50127	0.012375	0.140951
NM_011987	118.662	-0.841256	0.336332	-2.50127	0.012375	0.140951
NR_110990	118.662	-0.841256	0.336332	-2.50127	0.012375	0.140951
NM_001164171	14.6153	-0.840801	0.407143	-2.06513	0.0389111	0.276415
NM_010856	14.6153	-0.840801	0.407143	-2.06513	0.0389111	0.276415
NM_010360	12.4218	-0.837333	0.470924	-1.77806	0.0753935	0.386194
NM_011795	75.3758	-0.837244	0.36663	-2.28362	0.0223938	0.201381
NM_008988	854.384	-0.836981	0.219948	-3.80536	0.0001416	0.00781439
NM_026436	24.8488	-0.835723	0.43092	-1.93939	0.0524533	0.322674
NM_009511	43.9964	-0.835686	0.275592	-3.03233	0.00242672	0.0487029
NM_001244952	311.592	-0.834358	0.304159	-2.74316	0.00608502	0.0877819
NM_029838	311.592	-0.834358	0.304159	-2.74316	0.00608502	0.0877819
NM_198711	311.592	-0.834358	0.304159	-2.74316	0.00608502	0.0877819
NM_001040691	833.614	-0.834327	0.211893	-3.93749	8.23368e-05	0.00530743
NM_010094	739.26	-0.834168	0.480244	-1.73697	0.082393	0.406849
NM_011677	802.895	-0.832367	0.20873	-3.98778	6.66949e-05	0.00452346
NM_007759	84.6517	-0.831771	0.281373	-2.95611	0.00311542	0.0572646
NM_146100	282.209	-0.831709	0.26652	-3.12062	0.0018047	0.0400268
NM_009253	172.291	-0.831477	0.212126	-3.91973	8.86469e-05	0.00561254
NM_001081048	294.245	-0.830892	0.210259	-3.95176	7.75775e-05	0.00508738
NM_008052	83.8085	-0.830434	0.272185	-3.05099	0.00228089	0.0472723
NM_001008700	77.0993	-0.830365	0.403316	-2.05884	0.0395092	0.277929
NM_181422	8.81552	-0.829773	0.475432	-1.7453	0.0809323	0.404212
NM_001177604	2917.69	-0.826906	0.223043	-3.70739	0.000209404	0.010082
NM_001177605	2917.69	-0.826906	0.223043	-3.70739	0.000209404	0.010082
NM_026743	26.5538	-0.826755	0.323662	-2.55438	0.0106377	0.128637
NM_001177602	2917.76	-0.826675	0.223083	-3.70568	0.000210824	0.0101088
NM_009647	2916.9	-0.826641	0.223008	-3.70678	0.000209912	0.0100857
NM_001113514	1589.07	-0.826106	0.236727	-3.48969	0.000483572	0.0172793
NR_131964	235.518	-0.825716	0.240572	-3.43231	0.000598467	0.020005
NR_024599	13.7363	-0.82571	0.433159	-1.90625	0.0566175	0.336235
NR_040658	122.032	-0.824963	0.299628	-2.75329	0.00589988	0.0856929
NM_001043336	396.235	-0.824581	0.218225	-3.77858	0.000157727	0.00842617
NM_001286347	396.235	-0.824581	0.218225	-3.77858	0.000157727	0.00842617
NM_001256005	86.7103	-0.824031	0.295913	-2.78471	0.0053576	0.08151
NM_008620	86.7103	-0.824031	0.295913	-2.78471	0.0053576	0.08151
NM_001043335	395.794	-0.823321	0.217266	-3.78946	0.000150973	0.00819413
NM_007430	423.504	-0.823044	0.318775	-2.5819	0.00982587	0.121906
NM_009061	12.159	-0.822664	0.513849	-1.60098	0.10938	0.464308
NM_001286346	397.098	-0.822591	0.218428	-3.76595	0.000165914	0.00862715
NM_028270	24.1367	-0.822557	0.387284	-2.12391	0.0336777	0.254865
NM_178656	88.6882	-0.821496	0.425003	-1.93292	0.0532461	0.325642
NM_009396	8.8654	-0.821476	0.491842	-1.6702	0.0948791	0.436937
NM_001083935	155.523	-0.820723	0.348018	-2.35828	0.01836	0.178969
NM_001291104	24.1223	-0.820344	0.365577	-2.24397	0.0248343	0.216504
NM_010198	24.1223	-0.820344	0.365577	-2.24397	0.0248343	0.216504
NM_021492	221.37	-0.819188	0.225653	-3.6303	0.000283088	0.0124981
NM_009848	22.0096	-0.819171	0.420539	-1.94791	0.0514261	0.319959
NR_038162	41.3648	-0.818896	0.322565	-2.5387	0.0111266	0.132094
NR_045897	35.8912	-0.818779	0.397394	-2.06037	0.0393628	0.277508
NM_001040689	38.4148	-0.81869	0.395918	-2.06783	0.0386562	0.275683
NM_001083936	154.925	-0.817806	0.347269	-2.35496	0.0185245	0.179857
NR_040564	17.8253	-0.816261	0.388969	-2.09853	0.0358587	0.264403
NM_178791	44.9724	-0.816237	0.307294	-2.65621	0.00790237	0.105033
NM_181277	134.825	-0.815852	0.327174	-2.49363	0.0126445	0.142959
NM_145459	81.6913	-0.814965	0.258256	-3.15565	0.00160143	0.0373598
NR_045624	54.3414	-0.813911	0.365523	-2.2267	0.0259671	0.221834
NM_010296	198.089	-0.812764	0.253726	-3.20332	0.00135854	0.0340935
NM_001277238	9.25836	-0.811321	0.491062	-1.65218	0.0984984	0.443224
NM_010456	9.25836	-0.811321	0.491062	-1.65218	0.0984984	0.443224
NM_011255	15.5331	-0.811114	0.427691	-1.89649	0.0578948	0.340372
NM_027468	1337.33	-0.810065	0.167117	-4.84729	1.25161e-06	0.000292865
NM_001284507	22.7294	-0.809793	0.374312	-2.16342	0.0305092	0.240608
NM_013496	22.7294	-0.809793	0.374312	-2.16342	0.0305092	0.240608
NM_011889	229.864	-0.809244	0.220096	-3.67678	0.000236198	0.0110731
NM_020557	23.2457	-0.806038	0.470654	-1.71259	0.0867878	0.418193
NM_026515	575.66	-0.805058	0.166203	-4.84383	1.27363e-06	0.000294535
NR_040617	51.7953	-0.804537	0.383765	-2.09643	0.0360437	0.265132
NM_011199	158.612	-0.804165	0.351638	-2.28691	0.022201	0.20034
NM_001195617	206.588	-0.802918	0.269729	-2.97676	0.00291309	0.0550148
NM_001302939	82.32	-0.802613	0.316625	-2.5349	0.011248	0.133152
NM_027419	36.7666	-0.802441	0.329862	-2.43266	0.0149884	0.158723
NM_010827	87.9027	-0.801711	0.350386	-2.28808	0.0221328	0.200188
NM_001204166	98.3013	-0.801131	0.417646	-1.91821	0.055085	0.332542
NM_031402	172.268	-0.801102	0.248811	-3.21972	0.00128315	0.0329216
NM_001271422	16.6252	-0.800952	0.40298	-1.98757	0.0468588	0.302052
NM_001271423	16.6252	-0.800952	0.40298	-1.98757	0.0468588	0.302052
NM_001271424	16.6252	-0.800952	0.40298	-1.98757	0.0468588	0.302052
NM_007425	16.6252	-0.800952	0.40298	-1.98757	0.0468588	0.302052
NR_073173	16.6252	-0.800952	0.40298	-1.98757	0.0468588	0.302052
NR_073175	16.6252	-0.800952	0.40298	-1.98757	0.0468588	0.302052
NR_073176	16.6252	-0.800952	0.40298	-1.98757	0.0468588	0.302052
NR_040341	21.3681	-0.800419	0.369558	-2.16588	0.0303203	0.239877
NR_040548	15.4045	-0.799687	0.414752	-1.92811	0.0538414	0.327655
NM_001161799	18.1237	-0.798219	0.425703	-1.87506	0.0607843	0.346547
NR_015538	34.4308	-0.795704	0.36985	-2.15142	0.0314427	0.243835
NM_177722	106.297	-0.795498	0.311167	-2.5565	0.0105732	0.127988
NR_040437	15.0708	-0.794631	0.456272	-1.74157	0.081583	0.405801
NM_001025570	87.2947	-0.794053	0.268136	-2.96138	0.00306267	0.0567731
NR_033539	30.0507	-0.792654	0.498102	-1.59135	0.111531	0.466188
NM_010069	10.7421	-0.792626	0.515624	-1.53722	0.12424	0.487603
NM_009513	218.224	-0.790749	0.23083	-3.42568	0.000613269	0.0203833
NM_138948	19.3681	-0.790257	0.446945	-1.76813	0.0770389	0.391799
NM_010821	9.39242	-0.789606	0.529769	-1.49047	0.1361	0.507425
NM_001033481	325.991	-0.789579	0.291548	-2.70823	0.00676428	0.0943619
NM_001081403	35.3803	-0.787688	0.369986	-2.12897	0.0332571	0.252821
NM_030063	18.0479	-0.786547	0.472679	-1.66402	0.0961086	0.438635
NM_178257	14.5956	-0.785848	0.422141	-1.86158	0.0626629	0.351366
NM_199251	62.2799	-0.785833	0.345116	-2.27701	0.0227856	0.203774
NM_022880	659.212	-0.785323	0.242167	-3.2429	0.00118319	0.0309681
NM_001304721	51.8951	-0.784597	0.279782	-2.80432	0.00504229	0.0787613
NM_001291064	17.3115	-0.783874	0.413141	-1.89735	0.0577816	0.340163
NM_021482	17.3115	-0.783874	0.413141	-1.89735	0.0577816	0.340163
NM_175525	11.5436	-0.783806	0.474132	-1.65314	0.0983025	0.442807
NM_080644	54.9559	-0.783626	0.378699	-2.06926	0.038522	0.274977
NM_001159344	1956.85	-0.783119	0.194052	-4.03563	5.4457e-05	0.00398377
NM_013415	44.0845	-0.782722	0.382349	-2.04714	0.0406441	0.280811
NM_001145927	84.5586	-0.78212	0.361456	-2.16381	0.0304793	0.240603
NM_027195	1863.31	-0.781791	0.197956	-3.94932	7.83745e-05	0.00510831
NM_001002896	14.6206	-0.781686	0.386946	-2.02014	0.0433686	0.289689
NM_001159487	15.6135	-0.781545	0.427996	-1.82606	0.0678418	0.363119
NM_010243	6318	-0.781244	0.244833	-3.19092	0.0014182	0.0347533
NM_018733	70.6091	-0.778382	0.312453	-2.49119	0.0127314	0.143154
NM_008595	91.2444	-0.777842	0.324427	-2.39759	0.0165034	0.167315
NM_008546	17.9775	-0.777428	0.424237	-1.83253	0.066872	0.360373
NM_001271759	65.8823	-0.777322	0.454343	-1.71087	0.0871047	0.418858
NM_001271760	65.8823	-0.777322	0.454343	-1.71087	0.0871047	0.418858
NM_013461	65.8823	-0.777322	0.454343	-1.71087	0.0871047	0.418858
NM_008709	1270.44	-0.777241	0.268747	-2.89209	0.00382687	0.0656006
NM_181588	20.5065	-0.776592	0.398489	-1.94884	0.0513144	0.319677
NM_009233	17.9822	-0.775078	0.457131	-1.69553	0.0899756	0.425923
NM_009180	269.605	-0.775044	0.227202	-3.41126	0.000646635	0.0211913
NM_148938	1678.29	-0.773387	0.192324	-4.02128	5.78826e-05	0.00412925
NM_008078	21.9972	-0.773087	0.416609	-1.85566	0.0635014	0.353869
NM_177782	1220.27	-0.772841	0.226676	-3.40945	0.000650939	0.0212728
NM_011993	72.8129	-0.772613	0.349852	-2.2084	0.0272163	0.226068
NM_011148	58.6965	-0.771716	0.304573	-2.53377	0.0112844	0.133355
NM_001166063	21.4929	-0.771288	0.454224	-1.69804	0.0895012	0.424955
NM_153459	89.3531	-0.770352	0.302322	-2.54812	0.0108306	0.129961
NM_011703	14.8825	-0.769016	0.438326	-1.75444	0.0793555	0.398891
NM_001004174	115.496	-0.766958	0.3039	-2.52372	0.0116122	0.135997
NM_007866	32.093	-0.766777	0.449167	-1.70711	0.087802	0.420655
NM_183188	123.585	-0.765836	0.276448	-2.77027	0.00560101	0.0834765
NM_001198765	16.1843	-0.765013	0.420218	-1.82052	0.0686803	0.36499
NM_001198766	16.1843	-0.765013	0.420218	-1.82052	0.0686803	0.36499
NM_015784	16.1843	-0.765013	0.420218	-1.82052	0.0686803	0.36499
NM_015730	35.3869	-0.764337	0.388831	-1.96573	0.0493297	0.312302
NM_001159745	58.4807	-0.763809	0.318407	-2.39884	0.0164469	0.16725
NM_009368	40.9259	-0.76358	0.3118	-2.44894	0.0143278	0.154567
NM_001252508	182.601	-0.763284	0.295527	-2.58279	0.00980057	0.121722
NM_001033542	70.8459	-0.763154	0.253571	-3.00963	0.00261569	0.051103
NM_001145926	83.7465	-0.762895	0.365123	-2.08942	0.0366699	0.267528
NM_001302938	102.973	-0.762877	0.302723	-2.52005	0.0117338	0.136528
NM_018825	102.973	-0.762877	0.302723	-2.52005	0.0117338	0.136528
NM_175642	1192.25	-0.762281	0.191478	-3.98104	6.86136e-05	0.00464015
NM_029861	51.1034	-0.761872	0.282216	-2.6996	0.00694223	0.096176
NM_133686	97.3934	-0.761655	0.332585	-2.29011	0.0220152	0.199573
NM_027452	130.2	-0.761396	0.254127	-2.99613	0.00273432	0.0524
NR_028425	5347.06	-0.761152	0.253393	-3.00383	0.00266602	0.0514704
NM_001271761	70.7024	-0.760995	0.449759	-1.69201	0.0906446	0.427017
NR_029438	61.5501	-0.760841	0.320139	-2.3766	0.017473	0.173321
NR_125722	465.74	-0.760711	0.281862	-2.69888	0.00695737	0.0961785
NR_027923	30.8818	-0.760545	0.345431	-2.20173	0.0276843	0.227613
NM_012006	177.474	-0.760483	0.297896	-2.55285	0.0106845	0.12907
NM_001177653	414.018	-0.758398	0.272653	-2.78156	0.00540989	0.0817869
NM_001025597	194.184	-0.757947	0.251906	-3.00885	0.00262242	0.051103
NM_001301868	194.184	-0.757947	0.251906	-3.00885	0.00262242	0.051103
NM_009578	194.184	-0.757947	0.251906	-3.00885	0.00262242	0.051103
NM_009446	31.1845	-0.757539	0.391122	-1.93684	0.0527655	0.324228
NM_172842	105.939	-0.757369	0.316998	-2.3892	0.0168853	0.169352
NM_178194	414.535	-0.756275	0.272621	-2.77408	0.00553572	0.0828729
NR_033430	466.623	-0.755777	0.281901	-2.681	0.00734019	0.0999145
NM_001304329	143.237	-0.755294	0.361679	-2.0883	0.0367709	0.267788
NM_001304330	143.237	-0.755294	0.361679	-2.0883	0.0367709	0.267788
NM_177603	33.4214	-0.755149	0.421944	-1.78969	0.0735036	0.38121
NM_183221	157.161	-0.754756	0.235631	-3.20313	0.00135943	0.0340935
NM_175696	95.7417	-0.75449	0.35197	-2.14362	0.0320634	0.246457
NM_011211	1777.29	-0.754439	0.183512	-4.11112	3.93748e-05	0.00315524
NM_016853	35.2906	-0.754382	0.3037	-2.48397	0.0129927	0.145115
NR_040661	24.9688	-0.754034	0.381555	-1.97621	0.0481308	0.308129
NM_175730	34.3036	-0.753886	0.344637	-2.18748	0.0287075	0.231779
NM_028317	40.1034	-0.753635	0.409449	-1.84061	0.0656792	0.357706
NM_028157	30.3898	-0.752647	0.33614	-2.23909	0.0251503	0.217138
NM_001112798	599.087	-0.75243	0.157716	-4.77079	1.83508e-06	0.000380571
NM_001286684	599.087	-0.75243	0.157716	-4.77079	1.83508e-06	0.000380571
NM_011406	599.087	-0.75243	0.157716	-4.77079	1.83508e-06	0.000380571
NR_104580	599.087	-0.75243	0.157716	-4.77079	1.83508e-06	0.000380571
NR_045479	38.4612	-0.751528	0.368627	-2.03872	0.0414777	0.284281
NM_001126047	145.103	-0.751232	0.362749	-2.07094	0.0383645	0.274356
NM_001301173	33.3931	-0.750997	0.469872	-1.5983	0.109976	0.464823
NM_177791	33.3931	-0.750997	0.469872	-1.5983	0.109976	0.464823
NM_007873	32.068	-0.750872	0.376856	-1.99247	0.0463199	0.301372
NM_019417	64.4402	-0.749786	0.368349	-2.03553	0.0417972	0.285052
NM_001290763	182.46	-0.749533	0.213891	-3.50427	0.000457866	0.0169251
NM_026916	18.0959	-0.74931	0.406619	-1.84278	0.0653608	0.357472
NM_015767	253.709	-0.748609	0.233575	-3.20501	0.00135058	0.0340471
NM_001034894	37.1744	-0.74808	0.404523	-1.84929	0.064416	0.356653
NM_001159649	106.713	-0.747897	0.317062	-2.35883	0.0183324	0.178876
NM_080575	300.677	-0.747343	0.2477	-3.01713	0.00255177	0.0503024
NM_001080780	97.7652	-0.747117	0.268361	-2.78399	0.00536941	0.0815837
NM_009050	97.7652	-0.747117	0.268361	-2.78399	0.00536941	0.0815837
NM_028186	116.44	-0.746389	0.32472	-2.29856	0.0215297	0.197574
NR_045264	11.8283	-0.745182	0.56747	-1.31317	0.189127	0.580935
NM_021560	11.7615	-0.744692	0.471504	-1.5794	0.114245	0.470969
NM_153390	16.9075	-0.744298	0.427277	-1.74196	0.0815159	0.405655
NM_173052	24.864	-0.744014	0.468464	-1.5882	0.112242	0.467222
NM_001286607	201.67	-0.743678	0.472514	-1.57388	0.115516	0.472703
NM_212435	201.67	-0.743678	0.472514	-1.57388	0.115516	0.472703
NR_027926	15.5333	-0.743334	0.457	-1.62655	0.103832	0.454346
NM_146050	11.9166	-0.743257	0.483627	-1.53684	0.124333	0.487722
NM_001113515	159.14	-0.742162	0.304009	-2.44125	0.0146367	0.156655
NM_031163	159.14	-0.742162	0.304009	-2.44125	0.0146367	0.156655
NR_045979	35.5163	-0.742135	0.400742	-1.8519	0.0640403	0.355764
NM_001037712	58.5419	-0.741855	0.343994	-2.15659	0.0310373	0.242647
NM_001080781	10.3669	-0.741062	0.466781	-1.5876	0.112377	0.467222
NM_025601	10.3669	-0.741062	0.466781	-1.5876	0.112377	0.467222
NM_198114	206.939	-0.740166	0.220734	-3.3532	0.000798835	0.0238114
NM_013748	87.2636	-0.740063	0.300708	-2.46107	0.0138524	0.150829
NM_001199301	69.3736	-0.740025	0.368022	-2.01082	0.0443449	0.293529
NM_001162479	141.525	-0.739791	0.25254	-2.9294	0.00339612	0.0609585
NM_146162	13.2132	-0.739611	0.479684	-1.54187	0.123105	0.485929
NM_021453	17.6598	-0.738845	0.49072	-1.50564	0.132161	0.500427
NR_045450	30.3153	-0.738797	0.410444	-1.79999	0.0718617	0.375605
NM_001289591	15.9319	-0.7385	0.424364	-1.74025	0.0818147	0.406062
NM_001289592	15.9319	-0.7385	0.424364	-1.74025	0.0818147	0.406062
NM_028261	15.9319	-0.7385	0.424364	-1.74025	0.0818147	0.406062
NM_007645	31.0847	-0.738499	0.318922	-2.31561	0.0205794	0.19348
NM_001205204	353.732	-0.738245	0.20081	-3.67633	0.000236615	0.0110731
NM_007495	353.732	-0.738245	0.20081	-3.67633	0.000236615	0.0110731
NM_173014	385.736	-0.736939	0.21928	-3.36072	0.000777404	0.0235323
NM_001080929	291.531	-0.736774	0.275552	-2.67381	0.00749946	0.101492
NM_001001806	223.034	-0.735829	0.298942	-2.46144	0.0138379	0.150808
NM_001162476	142.934	-0.735214	0.252946	-2.9066	0.00365376	0.0638017
NM_172399	23.0567	-0.734972	0.362218	-2.02909	0.0424495	0.287157
NM_001097617	41.123	-0.73491	0.363465	-2.02196	0.0431809	0.288869
NM_144938	41.123	-0.73491	0.363465	-2.02196	0.0431809	0.288869
NM_001289927	64.9044	-0.734906	0.576715	-1.2743	0.202558	0.595048
NM_008262	45.0597	-0.733736	0.290789	-2.52326	0.0116272	0.135997
NM_001285947	476.566	-0.733327	0.22982	-3.19088	0.00141841	0.0347533
NM_001285948	476.566	-0.733327	0.22982	-3.19088	0.00141841	0.0347533
NM_018887	476.566	-0.733327	0.22982	-3.19088	0.00141841	0.0347533
NM_001205227	67.6214	-0.733178	0.358641	-2.04432	0.0409215	0.281783
NM_177216	67.6214	-0.733178	0.358641	-2.04432	0.0409215	0.281783
NM_001112813	216.924	-0.732178	0.26166	-2.7982	0.00513877	0.0796306
NM_001177888	216.924	-0.732178	0.26166	-2.7982	0.00513877	0.0796306
NM_001177890	216.924	-0.732178	0.26166	-2.7982	0.00513877	0.0796306
NM_009783	216.924	-0.732178	0.26166	-2.7982	0.00513877	0.0796306
NM_016687	37.6167	-0.732121	0.390802	-1.87338	0.061016	0.346953
NM_183289	378.699	-0.73153	0.342282	-2.13721	0.0325807	0.249055
NM_001293623	218.302	-0.730834	0.282153	-2.59021	0.00959179	0.120021
NM_001293624	218.302	-0.730834	0.282153	-2.59021	0.00959179	0.120021
NM_001293625	218.302	-0.730834	0.282153	-2.59021	0.00959179	0.120021
NM_008253	218.302	-0.730834	0.282153	-2.59021	0.00959179	0.120021
NM_010316	33.1289	-0.729621	0.330661	-2.20656	0.0273451	0.226452
NM_001301737	339.9	-0.729619	0.262399	-2.78057	0.00542632	0.0817869
NM_010065	339.9	-0.729619	0.262399	-2.78057	0.00542632	0.0817869
NR_125959	339.9	-0.729619	0.262399	-2.78057	0.00542632	0.0817869
NM_001013749	21.9478	-0.728825	0.468444	-1.55584	0.119745	0.481265
NM_172053	22.0225	-0.727715	0.396035	-1.8375	0.0661361	0.358624
NM_001311151	155.424	-0.727545	0.300716	-2.41937	0.0155473	0.161954
NR_027803	9.70623	-0.726809	0.503598	-1.44323	0.148955	0.52589
NM_183287	590.546	-0.726558	0.149514	-4.85946	1.17707e-06	0.000281043
NM_011921	14.3581	-0.7264	0.425651	-1.70656	0.0879036	0.420911
NM_153579	19.7171	-0.72611	0.367914	-1.97359	0.0484287	0.308938
NM_010942	79.5868	-0.725965	0.28548	-2.54296	0.0109917	0.131355
NM_001289925	66.556	-0.725132	0.576456	-1.25791	0.208423	0.60167
NM_018781	66.556	-0.725132	0.576456	-1.25791	0.208423	0.60167
NM_172665	2236.54	-0.724612	0.166597	-4.3495	1.36446e-05	0.0017165
NR_040423	650.937	-0.724307	0.221734	-3.26656	0.00108861	0.0290781
NM_016710	156.177	-0.724262	0.246309	-2.94047	0.00327717	0.0597216
NR_030601	10.6992	-0.723947	0.447031	-1.61946	0.105349	0.456749
NM_008004	55.2951	-0.723068	0.302195	-2.39272	0.0167242	0.168822
NM_183204	301.588	-0.722729	0.248638	-2.90675	0.00365202	0.0638017
NR_004443	53.524	-0.722686	0.341468	-2.11641	0.0343102	0.257481
NM_148946	172.771	-0.722644	0.297227	-2.43128	0.0150454	0.158938
NM_001199113	764.037	-0.722499	0.24159	-2.9906	0.00278427	0.05327
NM_176848	16.377	-0.722037	0.438785	-1.64554	0.0998593	0.446799
NM_009291	158.506	-0.721959	0.259076	-2.78667	0.00532525	0.0812564
NM_011898	2714.45	-0.721106	0.324989	-2.21886	0.026496	0.223577
NM_028175	16.2929	-0.721058	0.477573	-1.50984	0.131084	0.499144
NM_001101510	46.7954	-0.720864	0.306965	-2.34836	0.0188563	0.182322
NM_001142965	128.771	-0.720609	0.231537	-3.11229	0.00185643	0.0409412
NM_001162475	158.576	-0.720329	0.258908	-2.78218	0.0053995	0.0817753
NM_175013	160.837	-0.719647	0.264208	-2.72378	0.00645385	0.0910818
NM_175501	285.691	-0.718442	0.327635	-2.19281	0.0283212	0.230282
NM_001167832	39.8256	-0.718299	0.32562	-2.20594	0.0273883	0.226452
NM_146203	39.8256	-0.718299	0.32562	-2.20594	0.0273883	0.226452
NM_001159558	21.8296	-0.71758	0.343693	-2.08785	0.0368112	0.267998
NM_008859	28.4492	-0.71753	0.295852	-2.4253	0.0152958	0.160424
NM_001122895	58.8778	-0.717375	0.325351	-2.20493	0.0274592	0.226656
NM_008668	58.8778	-0.717375	0.325351	-2.20493	0.0274592	0.226656
NM_011834	18.4676	-0.717055	0.363745	-1.97131	0.0486883	0.310002
NM_001195496	2033.35	-0.716644	0.214336	-3.34356	0.000827104	0.0241314
NM_001195497	2033.35	-0.716644	0.214336	-3.34356	0.000827104	0.0241314
NM_001195498	2033.35	-0.716644	0.214336	-3.34356	0.000827104	0.0241314
NM_001195499	2033.35	-0.716644	0.214336	-3.34356	0.000827104	0.0241314
NM_027539	2033.35	-0.716644	0.214336	-3.34356	0.000827104	0.0241314
NM_023184	261.421	-0.716283	0.303742	-2.35819	0.0183642	0.178969
NM_001163753	29.2489	-0.71622	0.401745	-1.78277	0.0746234	0.384403
NM_080467	157.815	-0.716206	0.309632	-2.31309	0.0207178	0.194065
NM_001039530	112.642	-0.716164	0.307495	-2.32903	0.0198576	0.188345
NM_001290802	31.2341	-0.715707	0.316182	-2.2636	0.023599	0.208532
NM_001290804	31.2341	-0.715707	0.316182	-2.2636	0.023599	0.208532
NM_023209	290.284	-0.715692	0.216623	-3.30386	0.000953647	0.0263452
NM_001290761	219.519	-0.715582	0.197758	-3.61848	0.000296338	0.0129142
NM_001290762	219.519	-0.715582	0.197758	-3.61848	0.000296338	0.0129142
NM_026393	219.519	-0.715582	0.197758	-3.61848	0.000296338	0.0129142
NM_001163399	172.94	-0.714358	0.192252	-3.71573	0.000202615	0.00985655
NM_010488	172.94	-0.714358	0.192252	-3.71573	0.000202615	0.00985655
NM_026562	27.8887	-0.71384	0.476955	-1.49666	0.134482	0.504691
NM_053242	533.511	-0.713296	0.438123	-1.62807	0.10351	0.454206
NM_007863	233.858	-0.713231	0.324067	-2.20087	0.027745	0.227792
NM_008713	15.2117	-0.712616	0.485221	-1.46864	0.14193	0.516776
NM_001170788	45.935	-0.712403	0.333411	-2.13671	0.0326216	0.249286
NM_175280	43.3728	-0.712104	0.280403	-2.53957	0.0110988	0.132094
NR_036631	9.80037	-0.712011	0.48418	-1.47055	0.141413	0.515729
NR_029437	69.3678	-0.711946	0.314631	-2.2628	0.0236483	0.208889
NM_026358	54.5454	-0.711609	0.309865	-2.29651	0.0216466	0.197855
NR_028121	54.5454	-0.711609	0.309865	-2.29651	0.0216466	0.197855
NM_001101535	41.1055	-0.711571	0.3964	-1.79508	0.0726404	0.378167
NR_040574	22.994	-0.711413	0.421746	-1.68683	0.0916361	0.429957
NM_175206	58.6336	-0.711191	0.252181	-2.82016	0.0048	0.0764568
NM_019949	97.3916	-0.710509	0.268559	-2.64563	0.00815381	0.10767
NM_008197	283.339	-0.710058	0.464133	-1.52986	0.126051	0.490272
NM_011349	170.986	-0.709651	0.30533	-2.32421	0.0201141	0.190239
NM_007675	9.19372	-0.709532	0.491036	-1.44497	0.148466	0.525705
NM_025577	88.3227	-0.709528	0.298283	-2.37871	0.0173734	0.17262
NM_001038698	174.201	-0.703904	0.189245	-3.71954	0.000199588	0.00980976
NM_001277954	372.362	-0.703456	0.192469	-3.6549	0.000257284	0.0116764
NM_001277955	372.362	-0.703456	0.192469	-3.6549	0.000257284	0.0116764
NM_017400	372.362	-0.703456	0.192469	-3.6549	0.000257284	0.0116764
NM_177152	2122.03	-0.702637	0.176036	-3.99144	6.56731e-05	0.00450641
NM_011449	34.6633	-0.701985	0.351226	-1.99867	0.0456438	0.298246
NM_026443	32.676	-0.700788	0.379526	-1.84648	0.0648221	0.356653
NM_001163282	114.652	-0.700485	0.348042	-2.01264	0.0441524	0.292945
NM_138647	114.652	-0.700485	0.348042	-2.01264	0.0441524	0.292945
NM_001244198	101.965	-0.700242	0.360197	-1.94405	0.0518891	0.321374
NM_001244201	101.965	-0.700242	0.360197	-1.94405	0.0518891	0.321374
NM_001145920	61.0516	-0.699785	0.268534	-2.60594	0.00916218	0.116198
NM_001271630	61.0516	-0.699785	0.268534	-2.60594	0.00916218	0.116198
NM_001271631	61.0516	-0.699785	0.268534	-2.60594	0.00916218	0.116198
NM_029102	20.7623	-0.69917	0.344915	-2.02708	0.0426545	0.287795
NM_025582	21.9836	-0.698458	0.456373	-1.53046	0.125904	0.490105
NM_008269	8.69743	-0.69666	0.468246	-1.48781	0.136802	0.508025
NM_001199114	925.011	-0.696283	0.238933	-2.91413	0.00356677	0.0629055
NR_045955	18.6523	-0.695821	0.377737	-1.84208	0.0654633	0.357472
NM_001199116	918.695	-0.69506	0.239255	-2.90509	0.00367142	0.0639669
NM_018732	590.338	-0.694878	0.29294	-2.37208	0.0176881	0.174836
NM_001081025	30.5439	-0.694447	0.364988	-1.90266	0.0570852	0.338333
NM_021791	25.4015	-0.694108	0.384406	-1.80566	0.0709712	0.373603
NM_022987	228.988	-0.694099	0.328486	-2.11303	0.0345984	0.258793
NM_024230	31.4803	-0.694	0.332696	-2.08599	0.0369797	0.268742
NM_001293783	66.3341	-0.693988	0.457657	-1.51639	0.12942	0.495835
NM_025995	1158.56	-0.693866	0.229318	-3.02578	0.00247992	0.0493432
NM_001195500	1766.1	-0.693684	0.225011	-3.08289	0.00205	0.0436176
NM_001271002	9.407	-0.693003	0.48186	-1.43818	0.150382	0.529141
NM_020014	9.407	-0.693003	0.48186	-1.43818	0.150382	0.529141
NM_001242934	373.313	-0.691711	0.265581	-2.60452	0.00920024	0.116618
NM_001199115	976.381	-0.691574	0.236087	-2.92931	0.00339715	0.0609585
NM_001301863	175.769	-0.691105	0.254661	-2.71382	0.00665122	0.0931369
NM_001301865	175.769	-0.691105	0.254661	-2.71382	0.00665122	0.0931369
NM_001301866	175.769	-0.691105	0.254661	-2.71382	0.00665122	0.0931369
NM_001099738	22.2315	-0.690923	0.446326	-1.54802	0.121617	0.48364
NM_138664	22.2315	-0.690923	0.446326	-1.54802	0.121617	0.48364
NM_001289713	37.8085	-0.690579	0.320558	-2.1543	0.0312164	0.242911
NM_001289714	37.8085	-0.690579	0.320558	-2.1543	0.0312164	0.242911
NM_027749	37.8085	-0.690579	0.320558	-2.1543	0.0312164	0.242911
NM_001282016	28.2488	-0.690414	0.347216	-1.98843	0.0467644	0.302052
NM_008772	28.2488	-0.690414	0.347216	-1.98843	0.0467644	0.302052
NM_008036	198.211	-0.690337	0.577066	-1.19629	0.231585	0.623393
NM_001301840	622.192	-0.69033	0.210929	-3.27281	0.00106483	0.0286061
NM_007515	622.192	-0.69033	0.210929	-3.27281	0.00106483	0.0286061
NR_029441	68.1539	-0.690283	0.329231	-2.09665	0.0360245	0.26512
NM_016697	13598.8	-0.689205	0.215972	-3.19118	0.00141694	0.0347533
NM_027770	105.989	-0.688821	0.280926	-2.45197	0.0142077	0.153555
NM_028735	70.5175	-0.688798	0.248409	-2.77284	0.00555689	0.0830834
NM_001204165	115.804	-0.688631	0.396482	-1.73685	0.0824132	0.406849
NM_019688	115.804	-0.688631	0.396482	-1.73685	0.0824132	0.406849
NM_001044718	257.845	-0.686962	0.303889	-2.26057	0.0237861	0.20971
NM_011759	257.845	-0.686962	0.303889	-2.26057	0.0237861	0.20971
NM_172861	24.6436	-0.686533	0.366933	-1.871	0.0613447	0.348145
NM_010441	3846.83	-0.685932	0.304815	-2.25032	0.0244284	0.213602
NM_001005508	33.668	-0.685668	0.366977	-1.86842	0.0617029	0.349112
NM_001033668	42.7288	-0.684926	0.326294	-2.09911	0.0358073	0.264307
NM_153394	84.5205	-0.684618	0.250753	-2.73025	0.00632859	0.0898621
NM_016750	410.457	-0.684344	0.244793	-2.7956	0.00518035	0.0801157
NM_001161712	183.232	-0.683594	0.232057	-2.94581	0.00322114	0.058838
NM_001290661	246.365	-0.683357	0.180355	-3.78895	0.000151283	0.00819413
NM_001290664	246.365	-0.683357	0.180355	-3.78895	0.000151283	0.00819413
NM_198618	1649.61	-0.68331	0.236607	-2.88796	0.00387753	0.0662736
NM_054048	499.086	-0.682883	0.232908	-2.93199	0.00336802	0.0607621
NM_201518	893.618	-0.682539	0.223367	-3.05568	0.00224547	0.046787
NM_001109753	19.485	-0.682494	0.371017	-1.83952	0.0658384	0.358185
NR_045824	48.2393	-0.68238	0.313441	-2.17706	0.0294759	0.235395
NM_001305399	182.797	-0.681359	0.190253	-3.58133	0.000341843	0.0140659
NM_001302081	1609.15	-0.68128	0.23762	-2.8671	0.00414252	0.0695843
NM_009675	32.1734	-0.681031	0.347839	-1.95789	0.0502424	0.316198
NM_007625	40.8123	-0.680694	0.371094	-1.83429	0.0666112	0.359962
NM_146025	91.1753	-0.680548	0.223236	-3.04856	0.00229943	0.0473725
NM_007623	223.471	-0.680433	0.306595	-2.21932	0.0264651	0.223478
NM_001081072	13.3858	-0.679619	0.437934	-1.55188	0.120692	0.482867
NM_178110	324.95	-0.6796	0.191338	-3.55182	0.000382573	0.0149992
NM_007445	16.8686	-0.679566	0.404498	-1.68002	0.0929532	0.431973
NM_009189	42.633	-0.679408	0.350012	-1.9411	0.0522461	0.322314
NM_001190374	62.5378	-0.678904	0.249949	-2.71617	0.00660411	0.0926993
NM_001162977	417.227	-0.678856	0.269027	-2.52337	0.0116235	0.135997
NM_030188	25.4274	-0.678038	0.435507	-1.55689	0.119496	0.480413
NM_010831	535.664	-0.677945	0.229077	-2.95946	0.00308177	0.0569523
NM_198610	190.803	-0.677734	0.389336	-1.74074	0.0817284	0.406062
NM_183185	31.5998	-0.676032	0.386324	-1.74991	0.0801335	0.401639
NM_001174053	1016.61	-0.675336	0.200723	-3.36451	0.000766798	0.0234234
NM_001174054	1016.61	-0.675336	0.200723	-3.36451	0.000766798	0.0234234
NM_007595	1016.61	-0.675336	0.200723	-3.36451	0.000766798	0.0234234
NM_025778	76.6552	-0.674245	0.362917	-1.85785	0.0631908	0.35272
NM_177360	76.2511	-0.673775	0.227478	-2.96194	0.0030571	0.0567731
NR_002855	36.6456	-0.673358	0.291796	-2.30764	0.0210194	0.195164
NM_001163752	173.212	-0.673171	0.240306	-2.8013	0.00508967	0.0791317
NM_029045	173.212	-0.673171	0.240306	-2.8013	0.00508967	0.0791317
NM_001081333	15.638	-0.672543	0.452831	-1.48519	0.137492	0.509965
NR_045687	18.1555	-0.672242	0.413869	-1.62429	0.104315	0.454901
NM_008417	7.87833	-0.672059	0.517869	-1.29774	0.194377	0.586565
NM_001080815	38.8815	-0.671986	0.383345	-1.75296	0.0796096	0.399825
NM_001310537	27.7032	-0.671896	0.32135	-2.09085	0.0365412	0.267118
NM_008026	247.571	-0.671712	0.209058	-3.21304	0.00131337	0.0333677
NM_007913	1537.51	-0.671676	0.507292	-1.32404	0.185489	0.578856
NM_001168244	668.083	-0.670851	0.160139	-4.18917	2.79976e-05	0.00260885
NM_001168246	668.083	-0.670851	0.160139	-4.18917	2.79976e-05	0.00260885
NM_027954	668.083	-0.670851	0.160139	-4.18917	2.79976e-05	0.00260885
NR_031759	668.083	-0.670851	0.160139	-4.18917	2.79976e-05	0.00260885
NR_045822	459.692	-0.670546	0.212735	-3.15203	0.00162141	0.0376383
NR_045823	459.692	-0.670546	0.212735	-3.15203	0.00162141	0.0376383
NM_001025310	136.168	-0.670353	0.287523	-2.33147	0.0197284	0.187729
NM_001289547	136.168	-0.670353	0.287523	-2.33147	0.0197284	0.187729
NM_001289548	136.168	-0.670353	0.287523	-2.33147	0.0197284	0.187729
NM_001289549	136.168	-0.670353	0.287523	-2.33147	0.0197284	0.187729
NM_016973	136.168	-0.670353	0.287523	-2.33147	0.0197284	0.187729
NR_110347	136.168	-0.670353	0.287523	-2.33147	0.0197284	0.187729
NM_001098237	26.1737	-0.669417	0.398024	-1.68185	0.0925973	0.43111
NM_133759	26.1737	-0.669417	0.398024	-1.68185	0.0925973	0.43111
NM_146188	503.316	-0.668416	0.175555	-3.80745	0.000140405	0.00778516
NM_001146038	72.0681	-0.668061	0.24371	-2.74121	0.00612127	0.0878937
NM_001271627	72.0681	-0.668061	0.24371	-2.74121	0.00612127	0.0878937
NM_009820	72.0681	-0.668061	0.24371	-2.74121	0.00612127	0.0878937
NR_073392	72.0681	-0.668061	0.24371	-2.74121	0.00612127	0.0878937
NM_001164225	43.0633	-0.667818	0.343618	-1.94349	0.0519572	0.321626
NM_026812	38.697	-0.667176	0.323325	-2.06348	0.0390667	0.277174
NM_010658	11.0411	-0.666899	0.486653	-1.37038	0.170569	0.558162
NM_001256318	84.434	-0.666837	0.306775	-2.1737	0.0297276	0.236678
NM_178381	305.006	-0.666798	0.173771	-3.83723	0.000124428	0.00724253
NM_008738	39.128	-0.666649	0.374289	-1.78111	0.0748953	0.384483
NR_040766	46.5787	-0.666024	0.332962	-2.0003	0.0454677	0.297594
NM_001024728	306.835	-0.665889	0.207945	-3.20224	0.00136365	0.0341474
NM_009426	419.954	-0.665339	0.504727	-1.31822	0.187432	0.580092
NM_009131	54.5443	-0.66505	0.301311	-2.20719	0.0273007	0.226452
NM_017463	147.946	-0.665026	0.278698	-2.38619	0.0170241	0.170075
NM_001291483	579.975	-0.664934	0.273786	-2.42867	0.0151545	0.159658
NM_010784	579.975	-0.664934	0.273786	-2.42867	0.0151545	0.159658
NM_001163019	230.233	-0.664499	0.267003	-2.48873	0.0128199	0.143597
NM_175287	230.233	-0.664499	0.267003	-2.48873	0.0128199	0.143597
NM_194059	149.04	-0.664316	0.212178	-3.13093	0.00174252	0.0391673
NM_001244200	97.5471	-0.664252	0.368344	-1.80335	0.071334	0.37436
NM_001310144	97.5471	-0.664252	0.368344	-1.80335	0.071334	0.37436
NM_001038610	1636.33	-0.664028	0.279154	-2.37872	0.017373	0.17262
NM_007826	1636.33	-0.664028	0.279154	-2.37872	0.017373	0.17262
NM_001159538	47.139	-0.663183	0.354195	-1.87237	0.0611559	0.347496
NM_013710	47.139	-0.663183	0.354195	-1.87237	0.0611559	0.347496
NM_001159289	387.661	-0.662625	0.264606	-2.50419	0.0122732	0.140225
NM_016707	387.661	-0.662625	0.264606	-2.50419	0.0122732	0.140225
NM_172259	21.0691	-0.662512	0.41898	-1.58125	0.113821	0.46955
NM_008265	15.9041	-0.662144	0.37999	-1.74253	0.0814158	0.405243
NR_045740	133.648	-0.661531	0.214116	-3.08959	0.00200433	0.0430269
NM_001077514	43.6813	-0.661125	0.269057	-2.45719	0.0140027	0.152041
NM_001101502	231.663	-0.660655	0.308212	-2.14351	0.0320723	0.246457
NM_001110508	231.663	-0.660655	0.308212	-2.14351	0.0320723	0.246457
NR_131914	54.6861	-0.660386	0.325844	-2.0267	0.0426936	0.287976
NM_001160211	89.2929	-0.660181	0.22324	-2.95728	0.00310368	0.0571386
NM_001160212	89.2929	-0.660181	0.22324	-2.95728	0.00310368	0.0571386
NM_028408	89.2929	-0.660181	0.22324	-2.95728	0.00310368	0.0571386
NM_001166635	62.0838	-0.659601	0.33979	-1.9412	0.0522337	0.322314
NM_026524	62.0838	-0.659601	0.33979	-1.9412	0.0522337	0.322314
NM_008070	86.8539	-0.6588	0.284571	-2.31506	0.0206095	0.193516
NM_008135	210.144	-0.658478	0.231944	-2.83895	0.00452616	0.0733432
NM_013624	13.5761	-0.657774	0.542773	-1.21188	0.22556	0.618163
NM_010201	75.0281	-0.657037	0.248757	-2.64128	0.00825924	0.108572
NM_008108	593.245	-0.656056	0.218104	-3.008	0.00262976	0.0511502
NM_001166067	180.489	-0.655737	0.28107	-2.333	0.0196481	0.187574
NM_172471	108.238	-0.65558	0.377066	-1.73864	0.0820988	0.406395
NR_045855	9.78646	-0.655172	0.468209	-1.39932	0.161718	0.545617
NM_001163630	597.719	-0.655171	0.21519	-3.04462	0.00232978	0.0477778
NM_001290337	16.7293	-0.654916	0.476558	-1.37426	0.16936	0.556428
NM_001272097	123.518	-0.654572	0.345079	-1.89687	0.0578447	0.340163
NM_001272098	123.518	-0.654572	0.345079	-1.89687	0.0578447	0.340163
NM_010634	123.518	-0.654572	0.345079	-1.89687	0.0578447	0.340163
NM_011776	30.0146	-0.654538	0.352262	-1.8581	0.0631548	0.352603
NM_080285	681.016	-0.6543	0.261637	-2.50079	0.0123917	0.140951
NM_011882	24.6933	-0.654268	0.48039	-1.36195	0.173213	0.562204
NM_027402	19.0126	-0.653821	0.44702	-1.46262	0.143571	0.518988
NM_001136063	9.48746	-0.653785	0.482022	-1.35634	0.174992	0.562758
NM_001271001	9.48746	-0.653785	0.482022	-1.35634	0.174992	0.562758
NM_013847	160.727	-0.653779	0.228795	-2.85749	0.00427007	0.070512
NM_007699	63.1404	-0.653498	0.32372	-2.01871	0.043517	0.290329
NM_153514	295.725	-0.653282	0.174884	-3.73552	0.00018733	0.00942655
NR_037269	92.0647	-0.653277	0.29544	-2.2112	0.0270219	0.225233
NR_038042	81.5808	-0.652647	0.227531	-2.86839	0.00412565	0.0695843
NM_001077515	26.3969	-0.652084	0.346028	-1.88449	0.0594993	0.344213
NM_001159290	381.695	-0.652033	0.265553	-2.45538	0.0140737	0.152671
NM_008730	10.8697	-0.651909	0.440322	-1.48053	0.138732	0.511684
NM_001161628	15.6044	-0.651527	0.405766	-1.60567	0.108346	0.462765
NM_008320	23.7462	-0.651485	0.440405	-1.47928	0.139064	0.512113
NM_001012336	566.259	-0.651274	0.273083	-2.38489	0.017084	0.170321
NM_001291482	566.259	-0.651274	0.273083	-2.38489	0.017084	0.170321
NM_010358	159.661	-0.651228	0.304977	-2.13534	0.0327335	0.249733
NR_108021	28.9073	-0.651149	0.338886	-1.92144	0.0546762	0.330757
NM_001244202	96.881	-0.650463	0.372523	-1.7461	0.0807937	0.403608
NM_013627	96.881	-0.650463	0.372523	-1.7461	0.0807937	0.403608
NM_019641	511.843	-0.650306	0.207257	-3.13767	0.00170295	0.0386118
NR_033305	17.1613	-0.649559	0.44424	-1.46218	0.143692	0.519186
NR_040581	25.2075	-0.649225	0.360753	-1.79964	0.0719173	0.375791
NM_001007573	42.6021	-0.648839	0.373119	-1.73896	0.0820417	0.406284
NM_011383	27.7543	-0.64854	0.410119	-1.58135	0.113798	0.469542
NM_011372	4601.46	-0.648218	0.206306	-3.14202	0.00167786	0.0384527
NR_015586	47.3111	-0.646216	0.286014	-2.25938	0.0238595	0.210119
NM_001207021	40.5341	-0.645759	0.318037	-2.03045	0.0423105	0.287124
NM_053254	122.049	-0.645425	0.273119	-2.36316	0.0181197	0.177392
NM_172553	19.1447	-0.645388	0.393936	-1.63831	0.101358	0.450288
NR_029452	26.722	-0.645035	0.404043	-1.59645	0.110388	0.465147
NR_045318	30.2912	-0.644768	0.448194	-1.43859	0.150267	0.529053
NM_177366	163.876	-0.644345	0.269376	-2.39199	0.0167573	0.168949
NR_045334	54.3067	-0.644271	0.32855	-1.96095	0.0498844	0.314514
NM_001033813	14.834	-0.643749	0.411358	-1.56493	0.117598	0.475695
NM_013633	1246.75	-0.64353	0.260335	-2.47193	0.0134384	0.147974
NM_028980	641.487	-0.642921	0.342228	-1.87863	0.0602951	0.345142
NM_013930	81.6053	-0.642904	0.28981	-2.21837	0.0265299	0.223616
NR_104381	624.737	-0.642903	0.215817	-2.97893	0.00289255	0.0548039
NM_025427	252.997	-0.64279	0.239935	-2.67901	0.00738394	0.100452
NM_207231	21.1997	-0.642517	0.437687	-1.46798	0.142109	0.516805
NM_008872	230.576	-0.642148	0.331659	-1.93617	0.0528467	0.32434
NM_009525	486.698	-0.641875	0.297026	-2.16101	0.0306948	0.24134
NM_001164052	86.0871	-0.641732	0.270908	-2.36882	0.017845	0.175664
NM_198642	9.29139	-0.64139	0.516185	-1.24256	0.214031	0.607558
NM_001080820	88.162	-0.641036	0.267592	-2.39558	0.0165943	0.167898
NM_001276422	88.162	-0.641036	0.267592	-2.39558	0.0165943	0.167898
NM_001276423	88.162	-0.641036	0.267592	-2.39558	0.0165943	0.167898
NM_146069	94.361	-0.64103	0.231915	-2.76407	0.00570854	0.0842269
NM_001163631	628.461	-0.64056	0.21148	-3.02893	0.00245418	0.0490383
NM_009122	643.109	-0.640538	0.207628	-3.08503	0.00203532	0.0434133
NM_001163632	643.197	-0.640502	0.207783	-3.08255	0.00205235	0.0436176
NM_026183	58.1911	-0.640482	0.304349	-2.10443	0.0353408	0.262437
NM_028133	378.645	-0.640214	0.290693	-2.20237	0.0276393	0.227322
NM_183141	8.44692	-0.639881	0.501713	-1.27539	0.20217	0.594978
NM_001122737	626.49	-0.639357	0.349784	-1.82786	0.0675703	0.362328
NM_025712	64.0966	-0.639279	0.32908	-1.94262	0.0520619	0.322068
NM_007865	92.6805	-0.638282	0.396601	-1.60938	0.107533	0.46109
NM_001033416	11.1145	-0.638232	0.514267	-1.24105	0.214587	0.608353
NR_073425	67.3623	-0.637142	0.261646	-2.43513	0.0148863	0.158114
NM_001159505	69.1273	-0.636841	0.295257	-2.1569	0.0310134	0.242541
NM_023517	69.1273	-0.636841	0.295257	-2.1569	0.0310134	0.242541
NM_172500	383.546	-0.636821	0.22098	-2.8818	0.00395405	0.0670441
NM_001162929	14.3069	-0.636396	0.488633	-1.3024	0.19278	0.585322
NM_008153	100.357	-0.636272	0.285997	-2.22475	0.0260977	0.222462
NM_175326	59.348	-0.63623	0.342296	-1.85871	0.0630679	0.352361
NM_001252655	107.45	-0.635264	0.303	-2.09658	0.0360307	0.26512
NM_001252656	107.45	-0.635264	0.303	-2.09658	0.0360307	0.26512
NM_001013758	34.8941	-0.635231	0.432928	-1.46729	0.142297	0.516908
NM_009946	23.0776	-0.634727	0.372416	-1.70435	0.0883153	0.421751
NM_001004154	701.208	-0.63454	0.195293	-3.24916	0.00115746	0.0305023
NM_134122	100.036	-0.633648	0.209993	-3.01747	0.00254892	0.0502884
NM_001033469	18.3969	-0.633159	0.429527	-1.47408	0.140459	0.514819
NM_001166029	63.4751	-0.632567	0.246091	-2.57045	0.0101565	0.124632
NM_177368	1420.36	-0.63249	0.186543	-3.39059	0.000697427	0.0222639
NM_001042699	316.233	-0.632136	0.223297	-2.83092	0.00464149	0.0746434
NM_173004	71.2549	-0.632112	0.28562	-2.21312	0.0268894	0.22495
NM_001199015	116.127	-0.631777	0.258985	-2.43944	0.0147102	0.15667
NM_153565	27.4884	-0.630985	0.352255	-1.79127	0.0732496	0.380206
NM_001163748	678.719	-0.630555	0.228422	-2.76048	0.00577159	0.0845115
NM_008804	678.719	-0.630555	0.228422	-2.76048	0.00577159	0.0845115
NM_010140	133.654	-0.629848	0.26968	-2.33554	0.0195151	0.186891
NR_131758	62.4099	-0.62974	0.308727	-2.03979	0.0413708	0.283715
NM_001034858	64.9258	-0.629645	0.292672	-2.15137	0.0314471	0.243835
NM_001082483	260.832	-0.629261	0.257571	-2.44306	0.0145635	0.156317
NM_001301811	22.1327	-0.629043	0.438777	-1.43363	0.151679	0.531784
NM_053269	568.28	-0.62876	0.190348	-3.30321	0.000955863	0.0263552
NM_175506	566.445	-0.628028	0.171386	-3.66441	0.000247914	0.0114446
NM_001163793	148.182	-0.627831	0.255274	-2.45943	0.0139156	0.151236
NM_175528	117.329	-0.627383	0.236089	-2.6574	0.0078746	0.104751
NM_183311	13.4907	-0.627098	0.450936	-1.39066	0.164329	0.54954
NM_001114385	36.025	-0.627023	0.333017	-1.88286	0.0597196	0.34474
NM_001122639	26.4086	-0.626496	0.445918	-1.40496	0.160033	0.542855
NR_104449	26.4086	-0.626496	0.445918	-1.40496	0.160033	0.542855
NM_198412	3062.27	-0.626365	0.216362	-2.89499	0.00379167	0.0653173
NM_001291440	570.877	-0.626234	0.191204	-3.27521	0.00105584	0.0284645
NM_001285882	58.2745	-0.626204	0.272577	-2.29735	0.0215989	0.197805
NM_010090	13.0343	-0.626074	0.461477	-1.35667	0.174885	0.562724
NM_025866	1040.71	-0.625563	0.179097	-3.49287	0.000477852	0.0172793
NM_015826	2902.51	-0.624634	0.269994	-2.31351	0.0206944	0.193976
NM_029004	32.4698	-0.623651	0.310663	-2.00749	0.0446978	0.295281
NM_175340	18.0189	-0.621871	0.396482	-1.56847	0.116771	0.475294
NM_172870	9886.11	-0.621826	0.32502	-1.91319	0.0557233	0.333708
NM_172527	106.502	-0.621522	0.256295	-2.42503	0.0153072	0.160472
NM_008058	114.15	-0.621417	0.333583	-1.86286	0.0624826	0.350847
NM_010859	18.2507	-0.621294	0.458512	-1.35502	0.175411	0.563138
NM_031182	667.557	-0.620429	0.184245	-3.36741	0.000758779	0.0232696
NM_027919	17.9856	-0.619884	0.452181	-1.37088	0.170414	0.557928
NM_001177955	30.6163	-0.619767	0.365954	-1.69357	0.0903475	0.426018
NM_001177956	30.6163	-0.619767	0.365954	-1.69357	0.0903475	0.426018
NM_001177957	30.6163	-0.619767	0.365954	-1.69357	0.0903475	0.426018
NM_001177958	30.6163	-0.619767	0.365954	-1.69357	0.0903475	0.426018
NM_001177959	30.6163	-0.619767	0.365954	-1.69357	0.0903475	0.426018
NM_001177960	30.6163	-0.619767	0.365954	-1.69357	0.0903475	0.426018
NM_001199016	115.781	-0.619354	0.259078	-2.39061	0.0168204	0.169136
NM_001310145	71.7623	-0.619258	0.36043	-1.71811	0.0857766	0.415394
NM_001310146	71.7623	-0.619258	0.36043	-1.71811	0.0857766	0.415394
NM_007707	305.566	-0.619159	0.457131	-1.35444	0.175595	0.563138
NM_053008	10.6561	-0.619032	0.473293	-1.30792	0.190899	0.582626
NM_001252623	95.4544	-0.61807	0.25847	-2.39127	0.0167904	0.169053
NM_172753	95.4544	-0.61807	0.25847	-2.39127	0.0167904	0.169053
NM_011439	1977.28	-0.617889	0.141333	-4.37185	1.23197e-05	0.00165818
NM_011905	38.9402	-0.617843	0.333766	-1.85113	0.0641512	0.356211
NM_001109749	72.4561	-0.617799	0.285214	-2.16609	0.0303046	0.239877
NM_153789	221.269	-0.617306	0.257682	-2.39561	0.0165925	0.167898
NM_024257	9.69381	-0.617197	0.472216	-1.30702	0.191205	0.583312
NM_177577	440.179	-0.617165	0.26985	-2.28707	0.022192	0.20034
NM_001285999	466.405	-0.616579	0.226999	-2.71622	0.00660326	0.0926993
NM_001277863	96.3045	-0.616531	0.325866	-1.89198	0.058494	0.342261
NM_010021	96.3045	-0.616531	0.325866	-1.89198	0.058494	0.342261
NM_024237	18.9895	-0.616257	0.441095	-1.39711	0.162382	0.546846
NM_021291	115.12	-0.61592	0.261731	-2.35325	0.0186099	0.180536
NM_001012623	1542.02	-0.61581	0.263784	-2.33452	0.0195685	0.186891
NM_001012624	1542.02	-0.61581	0.263784	-2.33452	0.0195685	0.186891
NM_001012625	1542.02	-0.61581	0.263784	-2.33452	0.0195685	0.186891
NR_015580	3264.17	-0.615271	0.264134	-2.32939	0.0198382	0.188314
NM_009183	108	-0.615123	0.298013	-2.06408	0.0390098	0.276855
NM_177674	116.055	-0.614136	0.195087	-3.14802	0.00164382	0.0379701
NR_027961	33.5881	-0.613457	0.320081	-1.91657	0.0552927	0.333194
NM_080445	147.143	-0.613217	0.247169	-2.48096	0.0131029	0.145684
NM_016875	105.252	-0.613115	0.390935	-1.56833	0.116804	0.475294
NR_045694	24.3396	-0.612824	0.399253	-1.53493	0.124802	0.488619
NM_027147	16.0679	-0.611832	0.412168	-1.48442	0.137696	0.510288
NR_033540	15.4888	-0.611819	0.44979	-1.36023	0.173756	0.562204
NM_028804	242.642	-0.611503	0.287789	-2.12483	0.0336008	0.254507
NM_153127	60.5236	-0.610789	0.25707	-2.37596	0.0175032	0.173394
NM_008776	93.3627	-0.610431	0.286263	-2.13241	0.0329728	0.251313
NM_001081089	58.159	-0.610405	0.427639	-1.42738	0.15347	0.534381
NM_013628	114.593	-0.610344	0.330462	-1.84694	0.0647556	0.356653
NM_148935	78.3423	-0.610237	0.335229	-1.82036	0.0687042	0.365034
NM_001004176	2714.11	-0.609578	0.336601	-1.81098	0.0701439	0.370445
NM_021431	70.1137	-0.60938	0.24719	-2.46523	0.0136926	0.149997
NM_009182	14.5719	-0.609244	0.430084	-1.41657	0.156608	0.539455
NR_045832	28.8986	-0.609137	0.363082	-1.67769	0.0934084	0.433148
NR_045833	28.8986	-0.609137	0.363082	-1.67769	0.0934084	0.433148
NR_045834	28.8986	-0.609137	0.363082	-1.67769	0.0934084	0.433148
NM_009234	745.912	-0.608817	0.213439	-2.85242	0.00433872	0.0712433
NM_001024698	28.4227	-0.608488	0.370545	-1.64214	0.10056	0.449133
NM_001177416	1474.95	-0.606718	0.242253	-2.50448	0.0122633	0.140225
NM_001177417	1474.8	-0.606715	0.242266	-2.50434	0.0122681	0.140225
NM_018763	38.3943	-0.605884	0.309674	-1.95652	0.0504042	0.31679
NM_009962	5.48442	-0.605865	0.561259	-1.07947	0.280377	0.673335
NM_011045	1279.87	-0.605723	0.237389	-2.55161	0.0107228	0.129331
NM_029794	588.27	-0.60523	0.272329	-2.22242	0.0262547	0.222866
NM_008415	239.668	-0.605094	0.338486	-1.78765	0.0738333	0.382338
NM_001080965	35.3354	-0.604516	0.40517	-1.49201	0.135697	0.50665
NM_001080966	35.3354	-0.604516	0.40517	-1.49201	0.135697	0.50665
NM_020572	35.3354	-0.604516	0.40517	-1.49201	0.135697	0.50665
NM_010514	645.915	-0.60447	0.426593	-1.41697	0.156491	0.539455
NM_001168624	5.22521	-0.604201	0.553112	-1.09237	0.274672	0.669004
NM_198614	5.22521	-0.604201	0.553112	-1.09237	0.274672	0.669004
NM_026280	216.275	-0.604141	0.235912	-2.56088	0.0104409	0.126912
NM_001177985	452.158	-0.604092	0.192514	-3.13791	0.00170154	0.0386118
NM_030150	42.8419	-0.603926	0.291267	-2.07345	0.0381307	0.2734
NM_019831	452.909	-0.603302	0.192187	-3.13913	0.0016945	0.0385817
NM_207667	100.35	-0.603126	0.234068	-2.57671	0.00997462	0.123099
NM_010439	708.255	-0.603053	0.205745	-2.93108	0.00337789	0.0608039
NR_015495	83.9206	-0.602471	0.270164	-2.23002	0.025746	0.220604
NM_025317	141.011	-0.602304	0.326803	-1.84302	0.0653258	0.357472
NM_001001454	173.375	-0.602242	0.310376	-1.94037	0.0523353	0.322314
NM_001109765	173.375	-0.602242	0.310376	-1.94037	0.0523353	0.322314
NM_001305822	173.375	-0.602242	0.310376	-1.94037	0.0523353	0.322314
NM_021324	173.375	-0.602242	0.310376	-1.94037	0.0523353	0.322314
NM_028116	128.061	-0.601763	0.252784	-2.38054	0.0172871	0.172128
NR_030721	25.4794	-0.601578	0.33165	-1.81389	0.0696942	0.368787
NM_001012765	390.178	-0.601349	0.235453	-2.55401	0.010649	0.128706
NM_001081235	189.307	-0.600619	0.184071	-3.26298	0.00110246	0.029281
NM_019883	366.632	-0.600608	0.291726	-2.05881	0.0395124	0.277929
NM_201374	87.2329	-0.600578	0.294066	-2.04232	0.0411195	0.282322
NM_026383	453.73	-0.600508	0.265604	-2.26091	0.0237646	0.209679
NM_001159627	98.2387	-0.60022	0.273222	-2.19682	0.0280334	0.229354
NM_001159628	98.2387	-0.60022	0.273222	-2.19682	0.0280334	0.229354
NM_010417	98.2387	-0.60022	0.273222	-2.19682	0.0280334	0.229354
NM_029537	79.7131	-0.600166	0.322266	-1.86233	0.0625568	0.351107
NM_001285441	27.988	-0.599238	0.353862	-1.69342	0.0903747	0.426018
NM_001177832	49.174	-0.598142	0.287373	-2.08141	0.037396	0.270404
NM_001009819	22.5077	-0.597465	0.364611	-1.63864	0.101289	0.450068
NM_010565	17.1592	-0.597274	0.462156	-1.29237	0.196231	0.588139
NM_001122736	660.893	-0.597242	0.430057	-1.38875	0.164908	0.550534
NM_178405	8.61792	-0.596429	0.549437	-1.08553	0.277688	0.671241
NM_001271861	12.5477	-0.596267	0.432433	-1.37887	0.167936	0.554158
NM_001243307	96.894	-0.595415	0.260449	-2.28611	0.022248	0.200609
NM_198616	96.894	-0.595415	0.260449	-2.28611	0.022248	0.200609
NM_001252192	669.236	-0.59531	0.192312	-3.09555	0.0019645	0.0422883
NM_001310459	669.236	-0.59531	0.192312	-3.09555	0.0019645	0.0422883
NM_010164	669.236	-0.59531	0.192312	-3.09555	0.0019645	0.0422883
NM_153777	60.6315	-0.594895	0.302794	-1.96468	0.049451	0.312704
NM_007960	2103.39	-0.593859	0.266305	-2.23	0.0257476	0.220604
NM_001167949	376.331	-0.593804	0.242828	-2.44537	0.0144702	0.15553
NM_213616	376.331	-0.593804	0.242828	-2.44537	0.0144702	0.15553
NM_001164532	581.142	-0.593775	0.274744	-2.16119	0.0306806	0.241309
NM_026682	581.142	-0.593775	0.274744	-2.16119	0.0306806	0.241309
NM_001289809	24.1818	-0.593733	0.413709	-1.43515	0.151246	0.530823
NM_001289811	24.1818	-0.593733	0.413709	-1.43515	0.151246	0.530823
NR_045178	21.6546	-0.593718	0.460135	-1.29031	0.196942	0.588763
NM_008239	17.0595	-0.593494	0.439968	-1.34895	0.177354	0.566727
NM_001163154	2034.39	-0.592768	0.268074	-2.21121	0.0270213	0.225233
NM_145492	3607.95	-0.592118	0.207096	-2.85915	0.00424781	0.0703927
NM_001145435	13.7334	-0.591389	0.504069	-1.17323	0.240703	0.634911
NM_029053	13.7334	-0.591389	0.504069	-1.17323	0.240703	0.634911
NM_027622	10.5652	-0.591384	0.511504	-1.15617	0.247613	0.642781
NM_018805	553.001	-0.591062	0.206598	-2.86093	0.00422406	0.070198
NM_175105	38.5557	-0.590874	0.332357	-1.77783	0.0754314	0.386303
NM_001102563	36.144	-0.590674	0.322718	-1.83031	0.0672033	0.361326
NM_207203	42.148	-0.589163	0.391889	-1.50339	0.132739	0.501364
NR_024328	38.8815	-0.588557	0.347684	-1.69279	0.0904947	0.426397
NM_008883	141.854	-0.588518	0.25642	-2.29513	0.0217256	0.198267
NM_001033669	37.29	-0.588473	0.368757	-1.59583	0.110527	0.465401
NM_001291441	37.29	-0.588473	0.368757	-1.59583	0.110527	0.465401
NM_001081635	1320.28	-0.588126	0.189552	-3.10271	0.0019176	0.0417783
NM_001081636	1320.28	-0.588126	0.189552	-3.10271	0.0019176	0.0417783
NM_008545	11.3351	-0.587952	0.488237	-1.20424	0.228499	0.621702
NM_011352	57.0005	-0.587916	0.260522	-2.25668	0.024028	0.211131
NR_045944	4.99086	-0.587828	0.570704	-1.03	0.303008	0.694561
NM_011438	114.714	-0.587784	0.29009	-2.02621	0.0427429	0.288112
NM_175638	44.5696	-0.587187	0.301195	-1.94952	0.0512331	0.319596
NM_001199217	133.353	-0.586614	0.312308	-1.87832	0.0603377	0.345142
NM_001199218	133.353	-0.586614	0.312308	-1.87832	0.0603377	0.345142
NM_023805	133.353	-0.586614	0.312308	-1.87832	0.0603377	0.345142
NM_001098528	104.006	-0.586512	0.24784	-2.3665	0.0179573	0.176103
NM_022983	146.843	-0.586403	0.234216	-2.50369	0.0122906	0.140342
NM_001162493	68.6102	-0.586125	0.334072	-1.75449	0.079347	0.398891
NM_001160366	101.686	-0.586098	0.247361	-2.3694	0.0178168	0.175535
NM_001164504	2535.66	-0.58605	0.224289	-2.61292	0.00897712	0.114973
NM_029372	36.2398	-0.586042	0.411274	-1.42494	0.154174	0.535717
NM_023203	200.18	-0.585366	0.247164	-2.36833	0.0178688	0.175709
NM_001277132	9.51314	-0.585047	0.533786	-1.09603	0.273065	0.667444
NM_027649	140.577	-0.584403	0.310844	-1.88005	0.060101	0.345142
NM_001281830	4.01536	-0.583855	0.5682	-1.02755	0.304161	0.695908
NR_040518	28.5741	-0.583211	0.359939	-1.6203	0.105167	0.456749
NM_172614	357.123	-0.583087	0.259892	-2.24357	0.02486	0.216561
NR_045902	17.0639	-0.582964	0.483199	-1.20647	0.227637	0.620653
NM_175488	60.4781	-0.58276	0.287774	-2.02506	0.042861	0.288295
NR_045749	11.079	-0.58257	0.464185	-1.25504	0.209465	0.603011
NM_172746	273	-0.582531	0.267937	-2.17413	0.0296951	0.23666
NM_001271860	38.2526	-0.581483	0.364324	-1.59606	0.110475	0.465401
NM_145222	531.532	-0.581116	0.262496	-2.21381	0.0268418	0.224666
NM_008815	622.64	-0.580702	0.198876	-2.91992	0.00350118	0.0622997
NR_040438	18.3291	-0.580427	0.432532	-1.34193	0.179619	0.569532
NM_001287172	1329.99	-0.580383	0.1517	-3.82587	0.00013031	0.00732965
NM_001162492	68.5244	-0.579858	0.334129	-1.73543	0.0826643	0.406849
NM_020271	136.292	-0.579753	0.292178	-1.98424	0.0472287	0.3036
NR_038005	331.419	-0.579498	0.259446	-2.23359	0.0255098	0.218967
NM_001114116	51.2569	-0.579042	0.363358	-1.59359	0.111029	0.465585
NM_016663	51.2569	-0.579042	0.363358	-1.59359	0.111029	0.465585
NM_008629	483.415	-0.579014	0.269243	-2.15052	0.0315139	0.243966
NM_029662	53.7349	-0.57897	0.349015	-1.65887	0.0971421	0.439657
NM_001177986	174.649	-0.578945	0.220164	-2.62961	0.00854828	0.111557
NM_181273	76.4957	-0.578032	0.286587	-2.01695	0.0437003	0.290908
NR_045187	79.4961	-0.578022	0.295339	-1.95715	0.0503298	0.316492
NM_025870	49.5454	-0.5779	0.345849	-1.67096	0.0947294	0.436677
NM_001166476	642.322	-0.577557	0.206164	-2.80144	0.00508749	0.0791317
NM_001166477	642.322	-0.577557	0.206164	-2.80144	0.00508749	0.0791317
NM_001164051	148.698	-0.577277	0.243682	-2.36898	0.0178373	0.175663
NM_001177988	175.4	-0.577135	0.218685	-2.63911	0.00831229	0.109147
NM_172845	28.5796	-0.577042	0.410055	-1.40723	0.159359	0.542193
NM_001029837	258.959	-0.576501	0.230541	-2.50064	0.0123968	0.140951
NM_001110506	74.0905	-0.576386	0.30893	-1.86575	0.0620761	0.349583
NM_001039155	159.302	-0.576053	0.336359	-1.71261	0.0867838	0.418193
NM_001004145	12.256	-0.575428	0.548416	-1.04925	0.294061	0.686
NM_001204931	37.399	-0.575412	0.336497	-1.71	0.0872652	0.419141
NM_139292	37.399	-0.575412	0.336497	-1.71	0.0872652	0.419141
NM_001177987	175.239	-0.575272	0.219711	-2.61832	0.00883644	0.113731
NM_001025427	642.481	-0.575126	0.206308	-2.78771	0.00530821	0.0811278
NM_001039356	642.481	-0.575126	0.206308	-2.78771	0.00530821	0.0811278
NM_001166535	642.481	-0.575126	0.206308	-2.78771	0.00530821	0.0811278
NM_001166536	642.481	-0.575126	0.206308	-2.78771	0.00530821	0.0811278
NM_001166537	642.481	-0.575126	0.206308	-2.78771	0.00530821	0.0811278
NM_001166539	642.481	-0.575126	0.206308	-2.78771	0.00530821	0.0811278
NM_001166540	642.481	-0.575126	0.206308	-2.78771	0.00530821	0.0811278
NM_001166541	642.481	-0.575126	0.206308	-2.78771	0.00530821	0.0811278
NM_001166542	642.481	-0.575126	0.206308	-2.78771	0.00530821	0.0811278
NM_001166543	642.481	-0.575126	0.206308	-2.78771	0.00530821	0.0811278
NM_001166544	642.481	-0.575126	0.206308	-2.78771	0.00530821	0.0811278
NM_001166545	642.481	-0.575126	0.206308	-2.78771	0.00530821	0.0811278
NM_001166546	642.481	-0.575126	0.206308	-2.78771	0.00530821	0.0811278
NM_016660	642.481	-0.575126	0.206308	-2.78771	0.00530821	0.0811278
NM_001164584	2721.16	-0.57512	0.221255	-2.59936	0.00933983	0.117787
NM_001164585	2721.16	-0.57512	0.221255	-2.59936	0.00933983	0.117787
NM_001304810	1205.25	-0.575074	0.229552	-2.5052	0.0122383	0.140099
NM_008426	1205.25	-0.575074	0.229552	-2.5052	0.0122383	0.140099
NM_027308	54.1308	-0.57494	0.265681	-2.16402	0.0304625	0.240603
NR_015561	17.9951	-0.57431	0.42397	-1.3546	0.175545	0.563138
NM_138670	67.4903	-0.573636	0.3362	-1.70624	0.087964	0.421
NR_040736	868.75	-0.57308	0.222965	-2.57027	0.010162	0.124632
NM_032002	209.238	-0.573029	0.226454	-2.53044	0.0113918	0.134286
NM_029762	465.697	-0.57283	0.241889	-2.36815	0.0178773	0.175709
NM_001162884	183.201	-0.572544	0.220198	-2.60013	0.00931877	0.117674
NR_126329	445.1	-0.572511	0.269807	-2.12193	0.0338438	0.25562
NR_037982	335.094	-0.57204	0.221467	-2.58296	0.00979575	0.121722
NR_037983	335.094	-0.57204	0.221467	-2.58296	0.00979575	0.121722
NM_175163	115.125	-0.571533	0.269412	-2.12141	0.0338875	0.255868
NM_001163608	194.872	-0.571391	0.238794	-2.39282	0.0167195	0.168822
NM_028199	194.872	-0.571391	0.238794	-2.39282	0.0167195	0.168822
NR_045886	138.478	-0.571176	0.2095	-2.72638	0.00640338	0.0904786
NM_009687	461.497	-0.571056	0.265908	-2.14757	0.0317477	0.244781
NM_031258	34.2646	-0.570969	0.338872	-1.68491	0.0920064	0.430708
NM_001085546	376.447	-0.570753	0.189512	-3.0117	0.00259789	0.0510395
NM_007511	192.529	-0.570744	0.251354	-2.27068	0.0231662	0.205936
NR_037991	80.9632	-0.570655	0.35971	-1.58643	0.112642	0.467915
NM_029872	673.458	-0.570526	0.265497	-2.1489	0.0316423	0.244679
NR_015459	15.2302	-0.570498	0.474476	-1.20237	0.229219	0.62253
NM_020605	128.941	-0.570376	0.301827	-1.88974	0.0587925	0.342267
NM_001291047	528.306	-0.570297	0.206029	-2.76804	0.00563942	0.0836229
NM_001291053	528.306	-0.570297	0.206029	-2.76804	0.00563942	0.0836229
NM_023249	528.306	-0.570297	0.206029	-2.76804	0.00563942	0.0836229
NM_001305819	645.958	-0.570026	0.288527	-1.97564	0.0481953	0.308168
NM_007931	33.4836	-0.569718	0.392813	-1.45035	0.14696	0.524513
NM_001267593	202.134	-0.569563	0.212077	-2.68564	0.00723904	0.0987675
NM_007451	781.6	-0.569024	0.283628	-2.00624	0.0448311	0.295744
NM_001164049	247.965	-0.568812	0.230903	-2.46342	0.0137618	0.150332
NM_001164050	247.965	-0.568812	0.230903	-2.46342	0.0137618	0.150332
NM_008840	247.965	-0.568812	0.230903	-2.46342	0.0137618	0.150332
NM_198702	1449.95	-0.568799	0.23007	-2.47229	0.0134252	0.147968
NM_008381	47.811	-0.568284	0.558808	-1.01696	0.309174	0.69974
NM_175454	32.2687	-0.568257	0.370195	-1.53502	0.124779	0.488619
NM_007825	1294.05	-0.567774	0.227859	-2.49178	0.0127106	0.142988
NM_198299	92.6502	-0.567397	0.219008	-2.59076	0.00957648	0.120021
NM_183358	150.922	-0.56704	0.283409	-2.00079	0.0454154	0.297418
NM_178214	46.6543	-0.566887	0.326802	-1.73465	0.0828031	0.407125
NM_146125	88.8035	-0.565658	0.327105	-1.72929	0.083758	0.408899
NM_001305844	655.214	-0.56536	0.287533	-1.96625	0.0492702	0.312015
NM_025838	26.8233	-0.565152	0.347105	-1.62819	0.103485	0.454206
NM_028336	26.8233	-0.565152	0.347105	-1.62819	0.103485	0.454206
NM_001166207	38.0854	-0.564887	0.288954	-1.95493	0.0505908	0.317489
NM_001164583	1596.76	-0.564615	0.215199	-2.62369	0.00869831	0.112812
NM_010100	33.0522	-0.564549	0.315462	-1.78959	0.0735193	0.38121
NM_026594	148.044	-0.564518	0.323708	-1.74391	0.0811746	0.404818
NM_001252565	32.0015	-0.56394	0.344348	-1.6377	0.101484	0.450593
NM_053273	1191.78	-0.563488	0.252776	-2.2292	0.0258008	0.220898
NM_001287195	13.3967	-0.563304	0.454464	-1.23949	0.215163	0.609147
NM_175430	122.544	-0.563262	0.234287	-2.40415	0.0162099	0.166212
NM_001252089	580.594	-0.563198	0.22104	-2.54794	0.0108361	0.129961
NM_009033	580.594	-0.563198	0.22104	-2.54794	0.0108361	0.129961
NM_172777	66.8206	-0.563179	0.366617	-1.53615	0.124502	0.488058
NM_001024717	77.8957	-0.562993	0.373893	-1.50576	0.132129	0.500427
NR_045696	34.1431	-0.562888	0.284905	-1.9757	0.0481886	0.308168
NM_001177961	150.004	-0.562037	0.222499	-2.52602	0.0115364	0.135512
NM_001177962	150.004	-0.562037	0.222499	-2.52602	0.0115364	0.135512
NM_023122	150.004	-0.562037	0.222499	-2.52602	0.0115364	0.135512
NM_009308	18.7223	-0.561336	0.47548	-1.18057	0.237774	0.631084
NM_013779	42.358	-0.56083	0.35767	-1.56801	0.116879	0.475333
NM_133198	58.3927	-0.560459	0.423512	-1.32336	0.185715	0.579143
NM_001302440	220.976	-0.560207	0.268376	-2.08739	0.0368526	0.268132
NM_027560	74.5959	-0.559645	0.335588	-1.66765	0.0953843	0.437923
NM_001311106	18.2778	-0.559459	0.427385	-1.30903	0.190525	0.582148
NM_025890	18.2778	-0.559459	0.427385	-1.30903	0.190525	0.582148
NM_008343	412.83	-0.559305	0.336172	-1.66375	0.0961629	0.438635
NM_018741	91.8543	-0.559251	0.260714	-2.14508	0.0319468	0.245734
NM_001286103	205.499	-0.559208	0.261793	-2.13607	0.0326738	0.249522
NM_001310712	337.266	-0.557733	0.195755	-2.84913	0.00438383	0.0717323
NM_198724	89.1004	-0.557587	0.338963	-1.64498	0.0999746	0.446977
NM_198725	89.1004	-0.557587	0.338963	-1.64498	0.0999746	0.446977
NM_011012	32.2482	-0.557525	0.348263	-1.60087	0.109405	0.464308
NR_045540	32.2482	-0.557525	0.348263	-1.60087	0.109405	0.464308
NR_045541	32.2482	-0.557525	0.348263	-1.60087	0.109405	0.464308
NR_045542	32.2482	-0.557525	0.348263	-1.60087	0.109405	0.464308
NM_177922	15.0053	-0.557444	0.472636	-1.17944	0.238225	0.631772
NM_001302439	222.041	-0.557291	0.268473	-2.07578	0.0379143	0.272719
NM_026057	222.041	-0.557291	0.268473	-2.07578	0.0379143	0.272719
NM_199473	28.4744	-0.55708	0.380981	-1.46222	0.14368	0.519186
NM_145700	25.8148	-0.556984	0.388779	-1.43265	0.151958	0.532365
NM_001253682	25.6905	-0.556726	0.332028	-1.67675	0.0935921	0.433656
NM_016984	25.6905	-0.556726	0.332028	-1.67675	0.0935921	0.433656
NR_046161	25.6905	-0.556726	0.332028	-1.67675	0.0935921	0.433656
NM_001287176	1510.22	-0.55668	0.14826	-3.75476	0.00017351	0.0088716
NM_001164466	21.3045	-0.556377	0.413209	-1.34648	0.178148	0.567287
NM_010197	195.15	-0.556303	0.352525	-1.57805	0.114554	0.47104
NM_001190325	8.152	-0.556175	0.540453	-1.02909	0.303438	0.695025
NM_007938	408.4	-0.55556	0.211065	-2.63218	0.00848395	0.111088
NM_001287386	10.2398	-0.555344	0.45485	-1.22094	0.222109	0.615264
NM_001164564	88.4121	-0.555219	0.339673	-1.63457	0.10214	0.451748
NM_033612	13.7476	-0.5544	0.428824	-1.29284	0.196067	0.587915
NM_001172064	63.3577	-0.554304	0.299618	-1.85004	0.0643085	0.356324
NM_001172065	63.3577	-0.554304	0.299618	-1.85004	0.0643085	0.356324
NM_178891	129.748	-0.554256	0.318265	-1.74149	0.0815973	0.405801
NM_178444	89.6945	-0.554235	0.339593	-1.63206	0.102667	0.452754
NM_183389	29.0951	-0.553963	0.329772	-1.67984	0.0929888	0.431973
NM_016957	725.66	-0.553764	0.266417	-2.07856	0.037658	0.271537
NM_001195075	189.308	-0.553652	0.250199	-2.21285	0.0269083	0.225027
NR_033505	127.511	-0.553253	0.282611	-1.95765	0.0502716	0.316258
NM_021350	188.497	-0.553072	0.266499	-2.07533	0.0379562	0.272805
NM_177236	32.0501	-0.553064	0.307661	-1.79764	0.0722337	0.376603
NM_001286062	142.743	-0.553057	0.17399	-3.17867	0.00147953	0.0356903
NM_009640	142.743	-0.553057	0.17399	-3.17867	0.00147953	0.0356903
NM_011055	1373.6	-0.552562	0.189224	-2.92015	0.00349859	0.0622997
NM_175564	21.4271	-0.552503	0.402268	-1.37347	0.169606	0.556842
NR_040322	963.081	-0.552476	0.207791	-2.6588	0.00784197	0.104397
NM_001270489	8.11675	-0.552303	0.526287	-1.04943	0.293979	0.686
NM_001289915	35.7911	-0.551602	0.324969	-1.6974	0.0896214	0.424971
NM_009856	35.7911	-0.551602	0.324969	-1.6974	0.0896214	0.424971
NM_175503	257.179	-0.551592	0.323045	-1.70748	0.0877332	0.420498
NM_175263	89.2981	-0.551105	0.262613	-2.09854	0.0358571	0.264403
NM_001301269	28.8717	-0.551003	0.330869	-1.66532	0.0958483	0.438635
NM_001113238	27.197	-0.550653	0.435053	-1.26572	0.205615	0.598001
NM_009923	39.4089	-0.550429	0.357418	-1.54001	0.123557	0.486081
NM_021394	19.1087	-0.550404	0.535719	-1.02741	0.304226	0.695922
NM_001163397	401.428	-0.550188	0.173453	-3.17197	0.00151409	0.0362252
NR_015519	48.0317	-0.550025	0.329265	-1.67046	0.0948276	0.436937
NM_001033789	102.534	-0.549707	0.238124	-2.30849	0.0209718	0.195164
NM_001082975	41.3413	-0.549636	0.368794	-1.49036	0.136129	0.507455
NM_001305843	679.374	-0.549438	0.282477	-1.94507	0.0517661	0.321181
NM_009696	679.374	-0.549438	0.282477	-1.94507	0.0517661	0.321181
NM_010234	384.315	-0.549139	0.564619	-0.972584	0.33076	0.71768
NM_175136	381.401	-0.548915	0.218909	-2.5075	0.0121587	0.139719
NM_080437	139.3	-0.54868	0.23217	-2.36327	0.0181146	0.177392
NM_026542	336.283	-0.54839	0.256192	-2.14054	0.0323109	0.247655
NM_016754	325.222	-0.548265	0.297355	-1.8438	0.0652119	0.357472
NM_001142804	143.739	-0.548232	0.280863	-1.95196	0.0509434	0.318723
NM_007390	1082.56	-0.548212	0.232038	-2.3626	0.0181474	0.177522
NM_008584	24.5028	-0.548169	0.394583	-1.38924	0.16476	0.550275
NM_001035244	28.1148	-0.547847	0.334144	-1.63955	0.101098	0.449811
NM_175481	596.479	-0.547613	0.24302	-2.25336	0.0242363	0.212399
NM_001033405	19.1353	-0.547582	0.456451	-1.19965	0.230274	0.622548
NM_001025311	157.903	-0.54758	0.278118	-1.96888	0.0489674	0.311525
NM_153553	10.2217	-0.547376	0.453279	-1.20759	0.227204	0.6202
NM_175126	248.99	-0.547341	0.294564	-1.85814	0.0631492	0.352603
NM_013687	262.511	-0.546525	0.211136	-2.5885	0.0096395	0.120553
NM_001085555	262.604	-0.546494	0.211283	-2.58655	0.00969426	0.121044
NM_001277179	55.0898	-0.546081	0.4875	-1.12017	0.262643	0.656229
NM_001277180	55.0898	-0.546081	0.4875	-1.12017	0.262643	0.656229
NM_001277181	55.0898	-0.546081	0.4875	-1.12017	0.262643	0.656229
NM_001277182	55.0898	-0.546081	0.4875	-1.12017	0.262643	0.656229
NM_001277183	55.0898	-0.546081	0.4875	-1.12017	0.262643	0.656229
NM_145974	386.403	-0.545956	0.157467	-3.46712	0.000526068	0.0182904
NM_199055	59.9449	-0.545882	0.271801	-2.00838	0.0446025	0.294817
NM_001256522	83.1363	-0.545571	0.299146	-1.82376	0.0681885	0.363367
NR_033326	144.818	-0.545474	0.310657	-1.75587	0.0791103	0.398426
NR_038186	39.9558	-0.544439	0.432208	-1.25967	0.207789	0.600997
NM_027298	11.1202	-0.544275	0.431684	-1.26082	0.207374	0.600368
NM_001033356	13.7068	-0.544164	0.462343	-1.17697	0.239207	0.633239
NM_001289692	13.7068	-0.544164	0.462343	-1.17697	0.239207	0.633239
NM_001289693	13.7068	-0.544164	0.462343	-1.17697	0.239207	0.633239
NR_040323	718.652	-0.544094	0.210797	-2.58113	0.00984788	0.121985
NM_175096	28.9371	-0.543934	0.439451	-1.23776	0.215806	0.60944
NM_001122950	16.6533	-0.543804	0.382166	-1.42295	0.15475	0.53636
NM_144879	353.257	-0.543741	0.201709	-2.69567	0.00702466	0.0965179
NR_027352	353.257	-0.543741	0.201709	-2.69567	0.00702466	0.0965179
NM_001271358	148.733	-0.543638	0.275682	-1.97197	0.0486129	0.309691
NM_001271359	148.733	-0.543638	0.275682	-1.97197	0.0486129	0.309691
NM_001271360	148.733	-0.543638	0.275682	-1.97197	0.0486129	0.309691
NM_145429	148.733	-0.543638	0.275682	-1.97197	0.0486129	0.309691
NM_001038658	21.4036	-0.54354	0.35355	-1.53738	0.124201	0.487532
NM_028224	21.4036	-0.54354	0.35355	-1.53738	0.124201	0.487532
NM_198636	131.129	-0.542933	0.288394	-1.88261	0.0597533	0.34474
NM_001004177	161.402	-0.54243	0.27698	-1.95837	0.0501861	0.315928
NM_017392	161.402	-0.54243	0.27698	-1.95837	0.0501861	0.315928
NM_001135728	1115.94	-0.542151	0.210119	-2.58021	0.00987399	0.122115
NM_001081005	2304.14	-0.541609	0.226093	-2.39552	0.0165968	0.167898
NM_029619	477.065	-0.541441	0.216368	-2.5024	0.0123354	0.140729
NM_001029933	26.7897	-0.541218	0.378118	-1.43135	0.152331	0.532378
NM_001077591	12.3305	-0.541051	0.488896	-1.10668	0.268432	0.662862
NM_011651	12.3305	-0.541051	0.488896	-1.10668	0.268432	0.662862
NM_008712	58.1244	-0.541043	0.290408	-1.86304	0.0624567	0.350847
NR_110345	206.363	-0.541032	0.225071	-2.40383	0.0162245	0.166289
NM_001033338	78.6307	-0.541028	0.253916	-2.13073	0.033111	0.251956
NM_019440	33.0421	-0.540851	0.563343	-0.960074	0.337018	0.722559
NM_001289530	201.511	-0.540814	0.228399	-2.36785	0.017892	0.175709
NM_052977	201.511	-0.540814	0.228399	-2.36785	0.017892	0.175709
NM_001311140	407.663	-0.540711	0.270777	-1.99688	0.0458378	0.299096
NM_026094	34.4454	-0.540505	0.378922	-1.42643	0.153746	0.535182
NM_026268	1702.3	-0.540478	0.247439	-2.18429	0.028941	0.232472
NM_009630	37.0146	-0.540377	0.366836	-1.47307	0.140731	0.515178
NM_001033428	25.5495	-0.540156	0.396623	-1.36189	0.173234	0.562204
NR_131928	813.239	-0.539978	0.225125	-2.39857	0.0164591	0.16725
NM_022722	30.728	-0.539885	0.420454	-1.28405	0.199124	0.591958
NM_025980	27.6831	-0.539378	0.400273	-1.34753	0.177811	0.567234
NM_001081977	1248.65	-0.538908	0.185173	-2.9103	0.00361082	0.0632406
NM_080563	1248.65	-0.538908	0.185173	-2.9103	0.00361082	0.0632406
NM_010601	33.4665	-0.538843	0.331319	-1.62636	0.103874	0.454346
NM_007592	428.688	-0.538704	0.216787	-2.48495	0.012957	0.144785
NM_021397	78.0912	-0.538674	0.250251	-2.15254	0.0313549	0.243584
NM_138313	436.545	-0.538261	0.269765	-1.9953	0.0460105	0.299972
NM_001256521	97.3135	-0.537776	0.301881	-1.78142	0.0748443	0.384475
NM_153743	656.368	-0.537593	0.249393	-2.15561	0.0311145	0.242829
NM_008957	3948.55	-0.536992	0.241157	-2.22673	0.0259655	0.221834
NM_011393	21.4627	-0.53691	0.370682	-1.44844	0.147495	0.5253
NM_153596	80.253	-0.536226	0.242805	-2.20846	0.0272123	0.226068
NM_008592	16.5141	-0.535863	0.388418	-1.37961	0.167708	0.553885
NM_026418	67.168	-0.535819	0.263045	-2.03699	0.0416514	0.284634
NM_026871	44.8073	-0.53565	0.315883	-1.69572	0.0899384	0.425833
NM_008067	109.111	-0.535553	0.254391	-2.10523	0.0352712	0.262087
NR_045794	21.2628	-0.535441	0.379496	-1.41092	0.158267	0.541848
NM_175207	44.4173	-0.535423	0.340182	-1.57393	0.115503	0.472703
NM_030689	63.1493	-0.535331	0.317405	-1.68659	0.0916826	0.430002
NM_001253757	1462.08	-0.534675	0.139596	-3.83016	0.000128059	0.00726022
NM_001253758	1462.08	-0.534675	0.139596	-3.83016	0.000128059	0.00726022
NM_023210	1462.08	-0.534675	0.139596	-3.83016	0.000128059	0.00726022
NM_198250	9.92479	-0.534648	0.463075	-1.15456	0.248271	0.643809
NM_198423	794.972	-0.534037	0.230509	-2.31677	0.0205164	0.19348
NM_028386	26.9559	-0.534009	0.361837	-1.47583	0.13999	0.513904
NM_201411	22.4774	-0.533763	0.401379	-1.32982	0.183577	0.576719
NM_001081127	734.567	-0.53365	0.248015	-2.15169	0.0314221	0.243835
NM_001099635	11.0028	-0.533234	0.469213	-1.13644	0.255771	0.650706
NR_033564	19.177	-0.532883	0.412922	-1.29052	0.196871	0.588626
NM_001141921	249.34	-0.532543	0.274076	-1.94305	0.0520102	0.321869
NM_009575	1039.9	-0.532444	0.280314	-1.89945	0.0575049	0.339527
NM_001146318	38.2068	-0.532414	0.353933	-1.50428	0.13251	0.500847
NM_001099307	42.2514	-0.532283	0.380211	-1.39997	0.161523	0.545458
NM_001162932	308.031	-0.531834	0.158867	-3.34766	0.000814981	0.0240527
NM_011172	336.055	-0.531604	0.215127	-2.47112	0.0134692	0.148174
NM_011746	150.806	-0.531191	0.273679	-1.94093	0.0522672	0.322314
NM_011698	10.2935	-0.530802	0.514868	-1.03095	0.302565	0.694499
NR_110508	15.2447	-0.530519	0.420193	-1.26256	0.206747	0.59939
NM_011676	104.253	-0.530483	0.31129	-1.70414	0.0883547	0.421751
NM_001081650	305.204	-0.530448	0.273337	-1.94063	0.0523027	0.322314
NR_024139	177.831	-0.529424	0.298281	-1.77492	0.075911	0.387995
NM_001285795	98.2585	-0.52923	0.286043	-1.85018	0.064288	0.356324
NM_009519	98.2585	-0.52923	0.286043	-1.85018	0.064288	0.356324
NM_028536	282.885	-0.52861	0.178145	-2.9673	0.00300424	0.056237
NM_001081679	18.1216	-0.528418	0.385428	-1.37099	0.170379	0.557891
NM_198617	42.8017	-0.528368	0.337112	-1.56734	0.117036	0.475695
NM_207242	14.1337	-0.52832	0.456964	-1.15615	0.247619	0.642781
NM_028662	155.137	-0.527572	0.263949	-1.99876	0.0456339	0.298246
NR_040539	1220.93	-0.527307	0.286382	-1.84127	0.0655821	0.357513
NM_028882	446.796	-0.527235	0.245595	-2.14677	0.0318116	0.244936
NM_144867	369.635	-0.527228	0.175495	-3.00423	0.00266255	0.0514459
NM_026789	16.5992	-0.527144	0.402117	-1.31092	0.189884	0.581551
NR_024067	1323.59	-0.527102	0.238777	-2.2075	0.0272788	0.22643
NR_030682	30.841	-0.526958	0.309964	-1.70006	0.0891192	0.423669
NM_028492	8.73007	-0.526804	0.495313	-1.06358	0.28752	0.678593
NM_138628	72.6494	-0.526439	0.321595	-1.63696	0.101638	0.451007
NM_028908	136.898	-0.526379	0.340874	-1.5442	0.122539	0.485077
NM_021480	3714.05	-0.526269	0.261847	-2.00984	0.0444486	0.293967
NM_013823	17.124	-0.526205	0.403033	-1.30561	0.191684	0.583937
NM_138655	9.41674	-0.525814	0.550995	-0.954299	0.339932	0.725671
NM_001025605	121.041	-0.525497	0.295903	-1.77591	0.0757473	0.387243
NM_001289499	45.556	-0.524792	0.311254	-1.68606	0.0917843	0.430134
NM_001289500	45.556	-0.524792	0.311254	-1.68606	0.0917843	0.430134
NM_001289501	45.556	-0.524792	0.311254	-1.68606	0.0917843	0.430134
NM_030067	45.556	-0.524792	0.311254	-1.68606	0.0917843	0.430134
NM_011854	159.016	-0.524668	0.48197	-1.08859	0.276335	0.66986
NR_015349	40.9366	-0.524028	0.351974	-1.48883	0.136533	0.507743
NM_001037915	12.0726	-0.523818	0.513687	-1.01972	0.307861	0.699107
NR_015610	42.3983	-0.523751	0.254925	-2.05453	0.0399248	0.278783
NM_001252463	231.943	-0.523623	0.287062	-1.82408	0.0681405	0.363367
NM_001252464	231.943	-0.523623	0.287062	-1.82408	0.0681405	0.363367
NM_001252465	231.943	-0.523623	0.287062	-1.82408	0.0681405	0.363367
NM_019988	231.943	-0.523623	0.287062	-1.82408	0.0681405	0.363367
NM_133995	70.1462	-0.522765	0.271404	-1.92615	0.054086	0.328716
NM_013640	37.7825	-0.522282	0.329385	-1.58563	0.112824	0.468079
NM_007603	25.4046	-0.521442	0.452306	-1.15285	0.248971	0.64457
NM_009292	1130.82	-0.521315	0.215274	-2.42164	0.0154507	0.16147
NM_146094	656.684	-0.521299	0.239805	-2.17384	0.0297169	0.236678
NM_001290996	20.7317	-0.521204	0.37768	-1.38001	0.167582	0.553885
NM_001271857	42.7392	-0.521078	0.349158	-1.49238	0.135599	0.506606
NM_001271858	42.7392	-0.521078	0.349158	-1.49238	0.135599	0.506606
NM_001290999	19.7827	-0.520912	0.384306	-1.35546	0.17527	0.563138
NM_001013771	104.886	-0.520772	0.277963	-1.87353	0.0609954	0.346953
NM_008894	149.431	-0.520454	0.249084	-2.08947	0.0366653	0.267528
NM_024440	35.5832	-0.520089	0.324877	-1.60088	0.109403	0.464308
NM_001163610	1035.04	-0.520062	0.233587	-2.22642	0.0259862	0.221899
NM_001033367	162.589	-0.520039	0.290596	-1.78956	0.0735245	0.38121
NM_001109751	28.7701	-0.51984	0.381849	-1.36138	0.173395	0.562204
NM_175445	134.433	-0.519797	0.284466	-1.82727	0.0676592	0.362361
NM_198191	37.3598	-0.519477	0.334642	-1.55234	0.120582	0.482762
NM_001302630	14.559	-0.519128	0.410986	-1.26313	0.206544	0.599097
NM_001302631	14.559	-0.519128	0.410986	-1.26313	0.206544	0.599097
NM_010452	379.813	-0.518859	0.208172	-2.49246	0.0126862	0.142969
NM_001204912	119.93	-0.518834	0.265525	-1.95399	0.0507021	0.317553
NM_011897	1465.15	-0.518584	0.24623	-2.1061	0.0351957	0.261609
NM_028448	627.22	-0.518077	0.200717	-2.58113	0.00984768	0.121985
NM_010272	121.72	-0.517957	0.271752	-1.90599	0.0566514	0.336235
NM_009056	1817.59	-0.516985	0.168936	-3.06025	0.00221155	0.0462862
NM_027787	1817.59	-0.516985	0.168936	-3.06025	0.00221155	0.0462862
NR_029468	1495.15	-0.515502	0.28942	-1.78116	0.074887	0.384483
NM_001163175	92.5715	-0.514935	0.250454	-2.05601	0.0397818	0.278471
NM_009266	316.678	-0.514904	0.326102	-1.57896	0.114344	0.471038
NM_021458	1128.71	-0.514735	0.161984	-3.17768	0.00148458	0.0357752
NR_038126	127.045	-0.514632	0.379124	-1.35743	0.174646	0.562449
NR_030567	272.744	-0.514482	0.271535	-1.89471	0.0581303	0.340992
NM_001033865	1200.78	-0.514464	0.258686	-1.98876	0.0467275	0.302052
NM_024277	1200.78	-0.514464	0.258686	-1.98876	0.0467275	0.302052
NM_001163516	38.4262	-0.514372	0.315337	-1.63118	0.102853	0.453314
NM_001004761	38.5141	-0.514317	0.347469	-1.48018	0.138825	0.511684
NM_027711	2359.2	-0.514016	0.185959	-2.76414	0.00570738	0.0842269
NR_015536	2272.43	-0.513702	0.261261	-1.96624	0.0492711	0.312015
NR_027943	2272.43	-0.513702	0.261261	-1.96624	0.0492711	0.312015
NM_001002272	276.148	-0.513664	0.254107	-2.02145	0.0432334	0.288869
NM_001290770	276.148	-0.513664	0.254107	-2.02145	0.0432334	0.288869
NM_001290771	276.148	-0.513664	0.254107	-2.02145	0.0432334	0.288869
NM_001290772	276.148	-0.513664	0.254107	-2.02145	0.0432334	0.288869
NM_019548	276.148	-0.513664	0.254107	-2.02145	0.0432334	0.288869
NR_027925	158.912	-0.513611	0.234907	-2.18644	0.0287834	0.231779
NR_131011	22.9878	-0.513089	0.43303	-1.18488	0.236065	0.629093
NM_010603	23.4173	-0.512922	0.325444	-1.57607	0.11501	0.471981
NM_016967	161.361	-0.512868	0.313938	-1.63366	0.102331	0.451881
NM_001271008	30.1165	-0.512646	0.38898	-1.31792	0.18753	0.580092
NM_001167743	18.8986	-0.51258	0.420752	-1.21825	0.22313	0.615583
NM_181545	18.8986	-0.51258	0.420752	-1.21825	0.22313	0.615583
NM_001033186	187.088	-0.512424	0.267744	-1.91386	0.055638	0.333708
NM_001177898	187.088	-0.512424	0.267744	-1.91386	0.055638	0.333708
NM_001177899	187.088	-0.512424	0.267744	-1.91386	0.055638	0.333708
NR_015492	76.495	-0.512392	0.26549	-1.92999	0.0536082	0.327171
NM_021389	2333.35	-0.510913	0.221082	-2.31097	0.0208347	0.194616
NR_110969	2333.35	-0.510913	0.221082	-2.31097	0.0208347	0.194616
NR_110970	2333.35	-0.510913	0.221082	-2.31097	0.0208347	0.194616
NM_001310597	12.9394	-0.510817	0.487127	-1.04863	0.294347	0.686
NM_198410	12.9394	-0.510817	0.487127	-1.04863	0.294347	0.686
NM_001081085	163.895	-0.510268	0.273912	-1.86289	0.0624779	0.350847
NM_001290407	163.895	-0.510268	0.273912	-1.86289	0.0624779	0.350847
NM_010202	785.028	-0.510179	0.2937	-1.73708	0.0823737	0.406849
NM_026637	282.484	-0.510149	0.213181	-2.39303	0.0167101	0.168822
NM_001285881	41.8439	-0.50999	0.307598	-1.65797	0.0973226	0.440134
NM_175293	41.8439	-0.50999	0.307598	-1.65797	0.0973226	0.440134
NM_031878	197.041	-0.509846	0.234301	-2.17603	0.0295527	0.235767
NR_105742	186.75	-0.509795	0.198717	-2.56543	0.0103047	0.125518
NM_001281487	15.3635	-0.509776	0.436805	-1.16706	0.243187	0.637883
NM_175286	138.273	-0.509431	0.277573	-1.8353	0.0664606	0.359643
NM_001122954	525.047	-0.509284	0.180867	-2.81579	0.00486577	0.0772934
NR_027924	196.432	-0.509046	0.23788	-2.13993	0.0323608	0.247859
NM_173868	28.3062	-0.508769	0.45326	-1.12247	0.261664	0.655647
NR_045188	28.3062	-0.508769	0.45326	-1.12247	0.261664	0.655647
NR_045189	28.3062	-0.508769	0.45326	-1.12247	0.261664	0.655647
NM_019959	10.6323	-0.508548	0.480541	-1.05828	0.289928	0.682265
NM_178045	93.2704	-0.508078	0.34141	-1.48817	0.136706	0.507822
NM_001243586	232.198	-0.507981	0.221458	-2.29381	0.0218017	0.198582
NM_027162	232.198	-0.507981	0.221458	-2.29381	0.0218017	0.198582
NM_001109764	482.415	-0.507394	0.219721	-2.30926	0.0209291	0.194953
NM_009819	482.415	-0.507394	0.219721	-2.30926	0.0209291	0.194953
NM_145732	482.415	-0.507394	0.219721	-2.30926	0.0209291	0.194953
NM_027289	180.354	-0.50739	0.277507	-1.82838	0.0674918	0.362328
NM_173767	34.8096	-0.507368	0.445765	-1.1382	0.255039	0.650638
NR_033552	75.1508	-0.507336	0.244938	-2.07129	0.0383321	0.274298
NM_029066	28.3937	-0.507319	0.33774	-1.5021	0.133072	0.501842
NM_009080	1351.56	-0.507042	0.228205	-2.22188	0.0262917	0.222979
NR_003373	1351.56	-0.507042	0.228205	-2.22188	0.0262917	0.222979
NM_175502	20.2403	-0.507022	0.418721	-1.21088	0.225941	0.618773
NM_001290434	1783.15	-0.506999	0.231462	-2.19042	0.0284937	0.23078
NM_010141	1783.15	-0.506999	0.231462	-2.19042	0.0284937	0.23078
NM_001033820	108.718	-0.506438	0.271435	-1.86578	0.0620721	0.349583
NM_026376	63.2967	-0.506306	0.32842	-1.54164	0.123162	0.485929
NR_030449	10.8255	-0.506136	0.530741	-0.95364	0.340266	0.725985
NM_001034876	14.8517	-0.506025	0.456255	-1.10908	0.267395	0.661612
NM_028454	94.4883	-0.505773	0.247334	-2.0449	0.0408651	0.281733
NM_199016	142.148	-0.505457	0.266754	-1.89485	0.0581129	0.340992
NM_025273	14.3151	-0.505446	0.430805	-1.17326	0.240692	0.634911
NR_030700	47.6446	-0.505298	0.323543	-1.56176	0.118344	0.477435
NM_009728	1772.63	-0.505173	0.214776	-2.35209	0.0186681	0.180876
NM_001285792	112.845	-0.505138	0.28261	-1.7874	0.0738728	0.382338
NM_001285794	112.845	-0.505138	0.28261	-1.7874	0.0738728	0.382338
NM_001294162	52.3966	-0.505096	0.28109	-1.79692	0.0723485	0.376866
NM_020493	775.7	-0.504747	0.458562	-1.10072	0.27102	0.665329
NM_027049	352.437	-0.504743	0.168621	-2.99336	0.00275924	0.0528343
NM_181548	99.3996	-0.504622	0.276675	-1.82388	0.0681698	0.363367
NM_001128151	6933.41	-0.504568	0.226746	-2.22526	0.0260637	0.222335
NM_153551	40.3925	-0.504227	0.351606	-1.43407	0.151553	0.531661
NM_001163554	126.102	-0.504182	0.328591	-1.53438	0.124937	0.488619
NM_001163555	126.102	-0.504182	0.328591	-1.53438	0.124937	0.488619
NM_001163556	126.102	-0.504182	0.328591	-1.53438	0.124937	0.488619
NM_011138	126.102	-0.504182	0.328591	-1.53438	0.124937	0.488619
NM_028602	235.006	-0.504151	0.327061	-1.54146	0.123205	0.485929
NM_053079	206.343	-0.503782	0.254841	-1.97685	0.0480588	0.307921
NM_001033371	26.4089	-0.503687	0.405099	-1.24337	0.213732	0.607299
NM_001170789	26.4089	-0.503687	0.405099	-1.24337	0.213732	0.607299
NM_019392	408.332	-0.503438	0.230761	-2.18164	0.0291359	0.233717
NM_011296	1859.13	-0.503253	0.252061	-1.99656	0.0458734	0.299245
NM_001081643	11.4885	-0.503185	0.455872	-1.10379	0.269686	0.663396
NM_010276	66.5476	-0.502877	0.379252	-1.32597	0.18485	0.578149
NM_011295	1881.75	-0.502786	0.266322	-1.88789	0.0590413	0.342806
NM_053270	2494.6	-0.502479	0.246972	-2.03456	0.0418952	0.285471
NM_183018	2494.6	-0.502479	0.246972	-2.03456	0.0418952	0.285471
NM_172450	53.9959	-0.502455	0.29291	-1.71539	0.0862743	0.416652
NM_001080809	15.8166	-0.50237	0.420372	-1.19506	0.232064	0.624002
NM_001143755	40.4782	-0.502235	0.310878	-1.61554	0.106194	0.458203
NM_001113368	15.2175	-0.502054	0.404571	-1.24095	0.214623	0.608353
NM_001113369	15.2175	-0.502054	0.404571	-1.24095	0.214623	0.608353
NM_007543	15.2175	-0.502054	0.404571	-1.24095	0.214623	0.608353
NM_007620	68.8758	-0.502044	0.287693	-1.74506	0.0809737	0.404333
NM_023113	187.552	-0.501889	0.314975	-1.59342	0.111065	0.465653
NM_025479	579.759	-0.501816	0.218148	-2.30035	0.0214285	0.197574
NM_177765	28.9622	-0.501547	0.324734	-1.54448	0.122471	0.48489
NR_102394	33.6919	-0.501324	0.34016	-1.47379	0.140539	0.514949
NM_001081420	236.974	-0.501196	0.223396	-2.24353	0.0248625	0.216561
NM_001164567	101.458	-0.50112	0.336684	-1.4884	0.136645	0.507822
NM_011700	101.458	-0.50112	0.336684	-1.4884	0.136645	0.507822
NM_001190448	1047.59	-0.500904	0.246772	-2.02982	0.0423747	0.287124
NM_021511	288.005	-0.500882	0.312111	-1.60482	0.108534	0.463318
NM_007431	3740.55	-0.500694	0.168691	-2.96812	0.00299631	0.0561334
NM_023627	139.872	-0.500557	0.266389	-1.87905	0.0602379	0.345142
NM_199200	63.6309	-0.500379	0.36992	-1.35267	0.176162	0.563887
NM_001111268	363.487	-0.500129	0.191909	-2.60607	0.00915885	0.116198
NM_010349	363.487	-0.500129	0.191909	-2.60607	0.00915885	0.116198
NM_009660	5.18589	-0.500094	0.545193	-0.917278	0.358997	0.741017
NM_001159706	12.3515	-0.50008	0.450278	-1.1106	0.26674	0.661612
NM_016770	12.3515	-0.50008	0.450278	-1.1106	0.26674	0.661612
NR_027975	25.9922	-0.50006	0.410441	-1.21835	0.223092	0.615583
NM_001290800	408.857	-0.499652	0.231157	-2.16152	0.0306548	0.241285
NM_001289464	11.6027	-0.499611	0.426979	-1.17011	0.241959	0.636392
NM_001289465	11.6027	-0.499611	0.426979	-1.17011	0.241959	0.636392
NM_001289466	11.6027	-0.499611	0.426979	-1.17011	0.241959	0.636392
NM_001289467	11.6027	-0.499611	0.426979	-1.17011	0.241959	0.636392
NM_011441	11.6027	-0.499611	0.426979	-1.17011	0.241959	0.636392
NM_030708	1220.59	-0.499551	0.309104	-1.61613	0.106067	0.458045
NM_010724	9.31796	-0.499016	0.529153	-0.943047	0.345657	0.732006
NM_010772	394.063	-0.498531	0.257784	-1.93391	0.0531237	0.325111
NM_023737	207.692	-0.498411	0.206925	-2.40865	0.0160116	0.164467
NM_001291236	106.618	-0.498224	0.305916	-1.62863	0.103391	0.454206
NM_026708	106.618	-0.498224	0.305916	-1.62863	0.103391	0.454206
NM_011150	20.7079	-0.497984	0.43421	-1.14687	0.251434	0.647227
NM_001252070	174.511	-0.497898	0.258756	-1.9242	0.0543293	0.329586
NM_026967	93.5305	-0.497873	0.285341	-1.74484	0.081013	0.404443
NR_045880	17.7558	-0.497789	0.456615	-1.09017	0.275637	0.669674
NM_175381	421.814	-0.497304	0.294744	-1.68724	0.091557	0.429773
NR_131052	33.6882	-0.497277	0.384095	-1.29467	0.195434	0.587485
NM_001177538	30.9383	-0.497128	0.323536	-1.53654	0.124405	0.487842
NM_001177539	30.9383	-0.497128	0.323536	-1.53654	0.124405	0.487842
NM_001252654	204.071	-0.496983	0.286238	-1.73626	0.0825185	0.406849
NM_010598	204.071	-0.496983	0.286238	-1.73626	0.0825185	0.406849
NM_001243584	234.578	-0.496922	0.220443	-2.2542	0.0241836	0.212017
NM_001243587	234.578	-0.496922	0.220443	-2.2542	0.0241836	0.212017
NM_016672	1046.09	-0.496509	0.24703	-2.00991	0.0444407	0.293967
NM_001291348	287.399	-0.495994	0.221462	-2.23963	0.0251149	0.21709
NM_001291349	287.399	-0.495994	0.221462	-2.23963	0.0251149	0.21709
NM_027532	287.399	-0.495994	0.221462	-2.23963	0.0251149	0.21709
NR_045912	15.9887	-0.49584	0.460379	-1.07703	0.281469	0.674528
NR_045913	15.9887	-0.49584	0.460379	-1.07703	0.281469	0.674528
NM_001164259	233.69	-0.494803	0.320854	-1.54215	0.123038	0.485902
NM_054071	233.69	-0.494803	0.320854	-1.54215	0.123038	0.485902
NM_145930	1449.78	-0.494645	0.217225	-2.27711	0.0227796	0.203774
NM_174987	73.1164	-0.494487	0.275473	-1.79504	0.0726466	0.378167
NM_001163104	29.7763	-0.494269	0.389352	-1.26946	0.204276	0.596313
NM_019946	64.6075	-0.494199	0.334164	-1.47891	0.139163	0.512156
NM_001301414	1079.03	-0.494153	0.208444	-2.37067	0.017756	0.175157
NM_146144	1079.03	-0.494153	0.208444	-2.37067	0.017756	0.175157
NM_010725	262.934	-0.494114	0.27431	-1.8013	0.0716555	0.37501
NM_019865	425.558	-0.494014	0.246624	-2.0031	0.0451661	0.296865
NM_153150	197.48	-0.493307	0.329427	-1.49747	0.134271	0.50414
NM_026853	21.068	-0.493152	0.359342	-1.37238	0.169947	0.557458
NM_001083316	86.5814	-0.493011	0.215294	-2.28994	0.0220248	0.199573
NM_001252330	1117.14	-0.492707	0.252605	-1.95051	0.0511157	0.319106
NM_175328	1117.14	-0.492707	0.252605	-1.95051	0.0511157	0.319106
NM_008949	132.308	-0.492649	0.269583	-1.82745	0.0676325	0.362328
NM_011058	87.9386	-0.492647	0.214837	-2.29312	0.0218409	0.198854
NM_001110222	46.8944	-0.492583	0.276389	-1.78221	0.0747154	0.384403
NM_001110223	46.8944	-0.492583	0.276389	-1.78221	0.0747154	0.384403
NM_001110224	46.8944	-0.492583	0.276389	-1.78221	0.0747154	0.384403
NM_010025	46.8944	-0.492583	0.276389	-1.78221	0.0747154	0.384403
NM_207161	121.774	-0.492571	0.267216	-1.84335	0.0652784	0.357472
NM_001164275	485.229	-0.492495	0.193391	-2.54663	0.0108767	0.130181
NM_001289683	485.229	-0.492495	0.193391	-2.54663	0.0108767	0.130181
NM_027322	485.229	-0.492495	0.193391	-2.54663	0.0108767	0.130181
NM_007397	1352.56	-0.492344	0.146803	-3.35377	0.000797172	0.0237921
NM_007957	23.9205	-0.492139	0.407818	-1.20676	0.227525	0.620653
NR_033325	52.7804	-0.492072	0.346661	-1.41946	0.155764	0.538363
NM_001163766	217.749	-0.491974	0.197429	-2.4919	0.0127062	0.142988
NM_178747	101.368	-0.491905	0.330411	-1.48877	0.136549	0.507743
NM_172831	18.1941	-0.491766	0.467943	-1.05091	0.2933	0.685676
NM_146011	43.3321	-0.49142	0.345701	-1.42152	0.155166	0.537329
NM_001309233	669.073	-0.491415	0.308984	-1.59042	0.11174	0.466624
NM_001135727	3051.92	-0.491413	0.218713	-2.24684	0.0246504	0.215382
NM_001011707	53.1838	-0.491273	0.361023	-1.36078	0.173583	0.562204
NM_029645	121.144	-0.490856	0.203114	-2.41666	0.0156637	0.162805
NM_001310762	8953.12	-0.490728	0.289012	-1.69795	0.0895168	0.424955
NM_001271777	5.89412	-0.490447	0.537564	-0.912351	0.361584	0.742949
NM_011858	8931.96	-0.490338	0.289134	-1.69589	0.0899071	0.425771
NM_001310760	8903.72	-0.490199	0.289232	-1.69483	0.0901078	0.426018
NM_009710	22.9836	-0.490153	0.370484	-1.32301	0.185832	0.579357
NM_019431	109.832	-0.490112	0.261748	-1.87245	0.0611437	0.347496
NM_001081283	114.11	-0.490026	0.260843	-1.87862	0.0602962	0.345142
NM_053068	148.945	-0.490008	0.286559	-1.70997	0.0872711	0.419141
NM_053107	30.1728	-0.489868	0.342596	-1.42987	0.152753	0.533156
NR_131915	90.0838	-0.489554	0.271193	-1.80519	0.0710457	0.37374
NM_026069	1060.13	-0.489517	0.240145	-2.03843	0.0415074	0.284402
NR_015522	764.776	-0.489028	0.160143	-3.0537	0.00226038	0.0469721
NM_178406	98.7362	-0.488908	0.361225	-1.35347	0.175905	0.563372
NM_008101	8.44653	-0.488685	0.51826	-0.942934	0.345715	0.732006
NM_001122889	1557.29	-0.488335	0.240226	-2.03281	0.0420713	0.286004
NM_146019	439.955	-0.488309	0.221337	-2.20619	0.027371	0.226452
NR_028378	29.4377	-0.488216	0.323035	-1.51134	0.130701	0.498415
NM_009214	2298.67	-0.488197	0.278179	-1.75498	0.0792631	0.398769
NM_001289630	657.852	-0.488105	0.201057	-2.4277	0.0151949	0.159724
NM_001289631	657.852	-0.488105	0.201057	-2.4277	0.0151949	0.159724
NM_028984	657.852	-0.488105	0.201057	-2.4277	0.0151949	0.159724
NM_026014	590.504	-0.488063	0.25056	-1.94789	0.0514281	0.319959
NM_013760	312.851	-0.487889	0.273816	-1.78181	0.0747799	0.384443
NM_001001985	36.6919	-0.487735	0.392313	-1.24323	0.213784	0.607299
NM_001305585	72.1102	-0.487727	0.281693	-1.73141	0.0833783	0.408156
NM_001013829	603.052	-0.487222	0.203984	-2.38853	0.0169161	0.169459
NM_013605	20.8931	-0.486923	0.363961	-1.33785	0.180947	0.572159
NM_011077	242.813	-0.486851	0.251752	-1.93385	0.0531315	0.325111
NM_144953	2906.95	-0.486681	0.284867	-1.70845	0.0875529	0.420169
NM_001198587	78.7981	-0.486526	0.266759	-1.82384	0.0681759	0.363367
NM_008126	211.666	-0.485884	0.265047	-1.8332	0.0667728	0.360164
NM_031396	97.1103	-0.485725	0.246742	-1.96856	0.0490039	0.311672
NM_012055	4778.32	-0.48549	0.221501	-2.19181	0.0283929	0.230282
NM_001289563	207.56	-0.485192	0.19271	-2.51773	0.0118114	0.137159
NM_001289565	207.56	-0.485192	0.19271	-2.51773	0.0118114	0.137159
NM_001168577	21.5502	-0.485137	0.412879	-1.17501	0.23999	0.634811
NM_010874	21.5502	-0.485137	0.412879	-1.17501	0.23999	0.634811
NM_172523	9.6862	-0.484912	0.467	-1.03836	0.299104	0.689668
NM_015737	108.182	-0.4849	0.212287	-2.28417	0.0223613	0.201171
NM_001079883	399.422	-0.484544	0.196768	-2.46251	0.0137968	0.150434
NM_001286343	399.422	-0.484544	0.196768	-2.46251	0.0137968	0.150434
NM_021399	399.422	-0.484544	0.196768	-2.46251	0.0137968	0.150434
NM_013851	106.125	-0.484351	0.248633	-1.94805	0.0514088	0.319959
NM_010098	329.597	-0.484238	0.249584	-1.94018	0.0523576	0.322314
NM_177763	45.1554	-0.484178	0.329124	-1.47111	0.14126	0.515673
NM_009639	26.9959	-0.48414	0.449906	-1.07609	0.281886	0.675126
NM_024228	52.9169	-0.484093	0.364961	-1.32642	0.184699	0.578149
NM_001145403	75.7636	-0.483788	0.326201	-1.4831	0.138049	0.510462
NM_001029890	580.867	-0.483758	0.221346	-2.18553	0.0288503	0.231823
NM_023794	8605.9	-0.483182	0.214112	-2.25667	0.0240285	0.211131
NM_001289561	207.487	-0.483137	0.19281	-2.50577	0.0122186	0.140079
NM_001289567	207.487	-0.483137	0.19281	-2.50577	0.0122186	0.140079
NM_033564	207.487	-0.483137	0.19281	-2.50577	0.0122186	0.140079
NM_007424	170.218	-0.48308	0.247203	-1.95418	0.0506794	0.317553
NM_001278226	1377.19	-0.483028	0.15361	-3.14452	0.0016636	0.0382382
NM_010059	1377.19	-0.483028	0.15361	-3.14452	0.0016636	0.0382382
NR_103477	1377.19	-0.483028	0.15361	-3.14452	0.0016636	0.0382382
NM_198625	321.3	-0.482569	0.201016	-2.40064	0.0163663	0.166739
NM_173419	83.513	-0.482565	0.211854	-2.27781	0.0227377	0.203612
NM_178250	24.5326	-0.482562	0.431189	-1.11914	0.26308	0.656802
NM_176973	64.9927	-0.482423	0.294763	-1.63664	0.101705	0.451145
NM_001163559	84.46	-0.482409	0.3167	-1.52324	0.127699	0.493319
NM_173867	4103.17	-0.482388	0.133425	-3.61541	0.00029987	0.0129448
NR_015597	316.267	-0.481877	0.184679	-2.60926	0.00907374	0.11583
NR_027808	316.267	-0.481877	0.184679	-2.60926	0.00907374	0.11583
NM_001018013	13.4921	-0.481803	0.494006	-0.975298	0.329412	0.716816
NM_001145968	12.2259	-0.481757	0.470576	-1.02376	0.305948	0.696991
NM_001145969	12.2259	-0.481757	0.470576	-1.02376	0.305948	0.696991
NM_027100	12.2259	-0.481757	0.470576	-1.02376	0.305948	0.696991
NR_045813	25.4593	-0.481679	0.430168	-1.11975	0.262822	0.656466
NM_172658	709.182	-0.481474	0.225604	-2.13415	0.0328301	0.250388
NM_027445	395.639	-0.48137	0.264601	-1.81923	0.0688769	0.365775
NM_001081134	22.7868	-0.48136	0.372641	-1.29175	0.196443	0.588539
NM_001290574	315.917	-0.481159	0.216712	-2.22028	0.0264001	0.223212
NM_138605	315.917	-0.481159	0.216712	-2.22028	0.0264001	0.223212
NM_010461	14.4516	-0.480813	0.392142	-1.22612	0.220153	0.613843
NM_025377	2218.34	-0.480489	0.177314	-2.70983	0.00673183	0.0940407
NM_032397	39.6601	-0.480312	0.339115	-1.41637	0.156667	0.539455
NM_007693	44.5069	-0.480181	0.318054	-1.50975	0.131108	0.499153
NM_008057	711.784	-0.479354	0.273091	-1.75529	0.079209	0.398583
NM_021883	52.4979	-0.478975	0.262735	-1.82304	0.0682979	0.363807
NR_028266	11.4716	-0.478814	0.492206	-0.972793	0.330656	0.717587
NM_001033447	79.9932	-0.478616	0.317161	-1.50906	0.131284	0.499503
NM_145521	34.6669	-0.47843	0.399314	-1.19813	0.230867	0.622548
NM_008563	2889.47	-0.478403	0.165269	-2.89469	0.00379532	0.0653173
NM_025717	359.6	-0.47838	0.23562	-2.0303	0.0423256	0.287124
NM_001085500	68.9365	-0.478189	0.294768	-1.62226	0.104748	0.456
NM_001177503	117.642	-0.478105	0.218611	-2.18701	0.0287414	0.231779
NM_001024699	157.56	-0.477836	0.226029	-2.11405	0.0345114	0.25841
NR_027817	358.566	-0.4774	0.193788	-2.46351	0.0137583	0.150332
NM_008637	189.32	-0.477267	0.241483	-1.9764	0.0481093	0.308076
NM_178674	32.3331	-0.476962	0.378799	-1.25914	0.207979	0.601024
NM_001081209	329.195	-0.47664	0.27759	-1.71707	0.085967	0.415851
NM_001204371	17.1493	-0.47651	0.436466	-1.09175	0.274945	0.669242
NM_011011	17.1493	-0.47651	0.436466	-1.09175	0.274945	0.669242
NM_009579	275.492	-0.476412	0.27743	-1.71723	0.085937	0.415806
NM_009076	1201.51	-0.476071	0.305615	-1.55775	0.119293	0.479875
NM_022814	198.93	-0.475989	0.248571	-1.9149	0.0555048	0.333699
NM_001177601	111.201	-0.475922	0.294543	-1.6158	0.106138	0.458045
NM_001177603	111.201	-0.475922	0.294543	-1.6158	0.106138	0.458045
NM_001177606	111.201	-0.475922	0.294543	-1.6158	0.106138	0.458045
NM_001177607	111.201	-0.475922	0.294543	-1.6158	0.106138	0.458045
NM_026757	111.201	-0.475922	0.294543	-1.6158	0.106138	0.458045
NM_145758	111.201	-0.475922	0.294543	-1.6158	0.106138	0.458045
NR_027656	261.908	-0.475867	0.273089	-1.74254	0.0814142	0.405243
NM_029338	26.6819	-0.475739	0.326812	-1.45569	0.145477	0.52183
NM_001081104	90.3535	-0.475635	0.356279	-1.33501	0.181874	0.574079
NM_177570	30.3698	-0.475329	0.32119	-1.4799	0.1389	0.511684
NM_001163833	50.3752	-0.475147	0.340462	-1.39559	0.162837	0.547288
NM_020625	147.706	-0.475099	0.291069	-1.63225	0.102626	0.452658
NM_183307	27.5343	-0.475013	0.396086	-1.19927	0.230423	0.622548
NM_009128	3934.24	-0.474931	0.240976	-1.97086	0.0487398	0.310246
NM_172951	82.1304	-0.474504	0.311859	-1.52153	0.128126	0.493909
NM_199309	29.4394	-0.474214	0.358694	-1.32206	0.18615	0.579683
NM_175138	28.8028	-0.473847	0.38656	-1.22581	0.220272	0.614027
NM_001198560	19.3242	-0.473717	0.475353	-0.996557	0.318979	0.708409
NM_001198561	19.3242	-0.473717	0.475353	-0.996557	0.318979	0.708409
NM_001201460	19.3242	-0.473717	0.475353	-0.996557	0.318979	0.708409
NM_010394	19.3242	-0.473717	0.475353	-0.996557	0.318979	0.708409
NM_001166282	28.5945	-0.473697	0.344491	-1.37506	0.169112	0.556235
NM_013491	362.278	-0.473515	0.206039	-2.29818	0.0215516	0.197574
NM_009085	448.453	-0.473423	0.230348	-2.05525	0.039855	0.278545
NM_001099328	9.68592	-0.47334	0.475726	-0.994985	0.319743	0.709288
NM_011667	66.5661	-0.473202	0.315245	-1.50106	0.13334	0.501975
NM_008003	17.1593	-0.473202	0.476845	-0.99236	0.321022	0.710237
NM_178757	114.039	-0.473079	0.307149	-1.54022	0.123506	0.486081
NM_008818	135.29	-0.4728	0.34687	-1.36305	0.172868	0.561719
NM_001081114	150.497	-0.472781	0.269427	-1.75476	0.0793003	0.398827
NM_175543	1060.19	-0.472758	0.26226	-1.80263	0.0714467	0.374503
NM_001301034	264.491	-0.472654	0.273658	-1.72717	0.0841375	0.410153
NM_008753	264.491	-0.472654	0.273658	-1.72717	0.0841375	0.410153
NM_016785	249.416	-0.472556	0.187638	-2.51844	0.0117875	0.137018
NM_177364	1400.58	-0.472554	0.189846	-2.48915	0.0128049	0.143597
NM_028902	1286.39	-0.472549	0.225191	-2.09844	0.0358662	0.264403
NM_021411	18.7543	-0.472485	0.435562	-1.08477	0.278023	0.671775
NM_001302351	71.7602	-0.472278	0.318691	-1.48193	0.138359	0.511165
NM_175462	71.7602	-0.472278	0.318691	-1.48193	0.138359	0.511165
NM_010156	102.765	-0.472149	0.377652	-1.25022	0.211218	0.604782
NM_016764	646.636	-0.47152	0.192084	-2.45476	0.0140979	0.152785
NM_009940	217.57	-0.471286	0.19607	-2.40366	0.0162319	0.166292
NM_001101430	312.291	-0.471186	0.217914	-2.16225	0.0305986	0.241151
NM_001110515	312.291	-0.471186	0.217914	-2.16225	0.0305986	0.241151
NM_013806	13.9712	-0.471134	0.484149	-0.973117	0.330495	0.717587
NM_027009	508.304	-0.471057	0.192939	-2.44149	0.014627	0.156655
NR_040312	64.2745	-0.470745	0.33607	-1.40073	0.161293	0.545076
NM_019732	62.2344	-0.470329	0.265831	-1.76928	0.0768473	0.391349
NM_001168561	131.038	-0.470274	0.205766	-2.28548	0.0222846	0.200707
NM_001168562	131.038	-0.470274	0.205766	-2.28548	0.0222846	0.200707
NM_175558	131.038	-0.470274	0.205766	-2.28548	0.0222846	0.200707
NM_021375	28.5026	-0.470191	0.391707	-1.20036	0.229999	0.622548
NM_001160012	244.551	-0.470019	0.261126	-1.79997	0.0718655	0.375605
NM_021544	158.694	-0.469599	0.31125	-1.50875	0.131362	0.499503
NM_001033162	51.527	-0.469466	0.367894	-1.27609	0.201923	0.594978
NM_001099636	17.0856	-0.469412	0.421076	-1.11479	0.26494	0.659081
NM_001301710	626.933	-0.469222	0.212213	-2.21109	0.0270297	0.225233
NM_001301711	626.933	-0.469222	0.212213	-2.21109	0.0270297	0.225233
NM_011900	626.933	-0.469222	0.212213	-2.21109	0.0270297	0.225233
NR_125917	626.933	-0.469222	0.212213	-2.21109	0.0270297	0.225233
NM_011289	1052.33	-0.469123	0.263937	-1.77741	0.0755009	0.386575
NM_001252401	45.3065	-0.469065	0.305375	-1.53603	0.124532	0.488085
NR_028486	23.0808	-0.468827	0.396748	-1.18168	0.237334	0.630526
NR_028487	23.0808	-0.468827	0.396748	-1.18168	0.237334	0.630526
NM_001195579	43.29	-0.468804	0.327142	-1.43303	0.151849	0.532064
NM_153509	27.6617	-0.468796	0.343296	-1.36558	0.172072	0.560619
NM_001162433	75.6472	-0.468644	0.293422	-1.59717	0.110228	0.464823
NM_133949	359.626	-0.468577	0.281586	-1.66406	0.0960999	0.438635
NM_008252	1007.72	-0.468552	0.209982	-2.23139	0.0256551	0.219972
NM_001310591	259.296	-0.46853	0.192594	-2.43273	0.0149854	0.158723
NM_008972	2170.23	-0.468468	0.220191	-2.12755	0.0333744	0.25327
NM_178035	81.3154	-0.468154	0.300172	-1.55962	0.11885	0.478653
NR_029447	183.337	-0.468139	0.313049	-1.49542	0.134806	0.505257
NM_027914	108.354	-0.467952	0.249102	-1.87856	0.0603051	0.345142
NM_001146023	54.9257	-0.46785	0.319478	-1.46442	0.143079	0.518374
NM_021793	370.703	-0.46757	0.219329	-2.13182	0.0330218	0.251604
NM_027246	869.267	-0.467454	0.167491	-2.79092	0.00525585	0.081069
NM_001164518	23.4002	-0.46724	0.438785	-1.06485	0.286944	0.678442
NM_001290784	6139.58	-0.467101	0.211801	-2.20537	0.027428	0.22662
NM_178886	6139.58	-0.467101	0.211801	-2.20537	0.027428	0.22662
NM_025478	493.963	-0.466818	0.16561	-2.81878	0.00482063	0.0767332
NM_001302333	33.0706	-0.466624	0.320814	-1.4545	0.145808	0.522045
NM_009920	33.0706	-0.466624	0.320814	-1.4545	0.145808	0.522045
NM_001039512	2434.68	-0.466547	0.145954	-3.19653	0.00139092	0.0345499
NM_054102	2434.68	-0.466547	0.145954	-3.19653	0.00139092	0.0345499
NM_026222	139.34	-0.466345	0.24041	-1.93979	0.0524049	0.32252
NM_007741	106.554	-0.466342	0.277216	-1.68223	0.0925241	0.431041
NM_139300	199.708	-0.465835	0.249562	-1.86661	0.0619567	0.349583
NM_029751	801.765	-0.465749	0.276423	-1.68491	0.092005	0.430708
NM_010453	87.0245	-0.465726	0.251112	-1.85466	0.0636454	0.354299
NM_001291235	112.924	-0.465647	0.30674	-1.51805	0.129002	0.495204
NM_001291237	112.924	-0.465647	0.30674	-1.51805	0.129002	0.495204
NM_001177775	48.3857	-0.465317	0.393295	-1.18312	0.23676	0.630255
NM_001162432	74.7458	-0.465088	0.29369	-1.5836	0.113284	0.468888
NM_010693	74.7458	-0.465088	0.29369	-1.5836	0.113284	0.468888
NM_013661	750.03	-0.465016	0.320752	-1.44977	0.147123	0.524618
NR_028520	149.409	-0.464776	0.211358	-2.199	0.0278781	0.228644
NM_027122	27.0047	-0.464142	0.34812	-1.33328	0.18244	0.575033
NM_009469	3843.04	-0.464106	0.211936	-2.18984	0.0285359	0.230884
NM_030562	160.236	-0.464102	0.271297	-1.71068	0.0871402	0.418943
NM_001081097	3012.99	-0.464044	0.203342	-2.28208	0.0224845	0.202041
NM_001310715	247.928	-0.46401	0.185761	-2.49789	0.0124936	0.141838
NM_013879	247.928	-0.46401	0.185761	-2.49789	0.0124936	0.141838
NM_001253822	10.1797	-0.46362	0.481897	-0.962073	0.336013	0.721705
NM_008393	10.1797	-0.46362	0.481897	-0.962073	0.336013	0.721705
NM_008937	160.536	-0.463439	0.323643	-1.43194	0.15216	0.532378
NM_001085549	1071.15	-0.463158	0.236059	-1.96204	0.0497576	0.314174
NM_001310670	387.402	-0.463111	0.185561	-2.49573	0.0125698	0.142363
NM_015772	195.56	-0.463105	0.270086	-1.71466	0.0864076	0.417049
NM_146201	964.936	-0.463101	0.249153	-1.8587	0.0630698	0.352361
NM_177776	633.928	-0.462643	0.281727	-1.64217	0.100555	0.449133
NM_001204233	1068	-0.462549	0.247837	-1.86634	0.0619935	0.349583
NM_130448	129.037	-0.462369	0.248442	-1.86107	0.062734	0.351597
NM_019833	91.6761	-0.462206	0.326188	-1.41699	0.156485	0.539455
NM_025660	115.739	-0.461442	0.219022	-2.10683	0.035132	0.261468
NM_007756	24.1445	-0.461297	0.395508	-1.16634	0.243477	0.638277
NM_021361	968.901	-0.461287	0.244611	-1.8858	0.0593215	0.34377
NM_001163479	2055.79	-0.461024	0.239875	-1.92193	0.0546142	0.330553
NR_028097	2055.79	-0.461024	0.239875	-1.92193	0.0546142	0.330553
NR_028098	2055.79	-0.461024	0.239875	-1.92193	0.0546142	0.330553
NM_029212	21.9414	-0.460837	0.352778	-1.30631	0.191447	0.58363
NM_019683	264.575	-0.460586	0.256161	-1.79803	0.0721715	0.376523
NM_144526	188.431	-0.460361	0.309142	-1.48916	0.136446	0.507741
NM_001278041	17.2988	-0.460334	0.383701	-1.19972	0.230249	0.622548
NM_009893	17.2988	-0.460334	0.383701	-1.19972	0.230249	0.622548
NM_133859	28.9972	-0.459928	0.321275	-1.43157	0.152267	0.532378
NM_001034878	35.5895	-0.459894	0.358466	-1.28295	0.199509	0.5922
NM_011613	98.4932	-0.459891	0.384503	-1.19607	0.231671	0.623393
NM_153513	36.71	-0.459843	0.341782	-1.34543	0.178488	0.567502
NM_009077	642.056	-0.459743	0.297619	-1.54474	0.122409	0.48489
NM_001163478	3127.79	-0.458816	0.241851	-1.8971	0.057815	0.340163
NR_028094	3127.79	-0.458816	0.241851	-1.8971	0.057815	0.340163
NR_028384	14.5706	-0.458587	0.493235	-0.929753	0.352499	0.737522
NM_001097621	144.251	-0.458274	0.325786	-1.40667	0.159525	0.542468
NM_001204167	47.4553	-0.458081	0.345571	-1.32558	0.18498	0.578149
NM_011231	2862.68	-0.457843	0.240027	-1.90746	0.0564606	0.335907
NR_028095	2862.68	-0.457843	0.240027	-1.90746	0.0564606	0.335907
NR_028096	2862.68	-0.457843	0.240027	-1.90746	0.0564606	0.335907
NM_001291352	292.474	-0.457596	0.217615	-2.10277	0.0354856	0.262975
NM_011978	692.844	-0.457579	0.234354	-1.95251	0.0508777	0.318483
NM_026729	404.515	-0.457572	0.190232	-2.40534	0.0161574	0.165749
NM_001290390	183.09	-0.457451	0.198254	-2.3074	0.0210325	0.195164
NM_001290392	183.09	-0.457451	0.198254	-2.3074	0.0210325	0.195164
NM_001290393	183.09	-0.457451	0.198254	-2.3074	0.0210325	0.195164
NM_027671	183.09	-0.457451	0.198254	-2.3074	0.0210325	0.195164
NM_027464	233.768	-0.457188	0.280638	-1.62911	0.103291	0.454134
NM_001081300	2312.81	-0.457075	0.240689	-1.89903	0.0575602	0.339527
NM_007804	1119.97	-0.457056	0.230671	-1.98142	0.0475439	0.305207
NM_001290779	22.7113	-0.456941	0.349794	-1.30631	0.191446	0.58363
NM_173387	22.7113	-0.456941	0.349794	-1.30631	0.191446	0.58363
NM_007740	13.9385	-0.45694	0.411483	-1.11047	0.266797	0.661612
[truncated: 21,411 more rows]

## Sheet: 4. GO RA diff higher in WT 
Category	Term	Count	%	-log10 p-value	p-value	Genes	Pop Hits	Pop Total	Fold Enrichment	Bonferroni	Benjamini	FDR
[truncated: 140 more rows]

[truncated: 1 more sheets: 5. GO RA diff higher in TAM]
