# Supplementary figures and images for: FBXL19 recruits CDK-Mediator to CpG islands of developmental genes priming them for activation during lineage commitment
Source: eLife journal article supplement (doi:10.7554/elife.37084), 2018-05-29

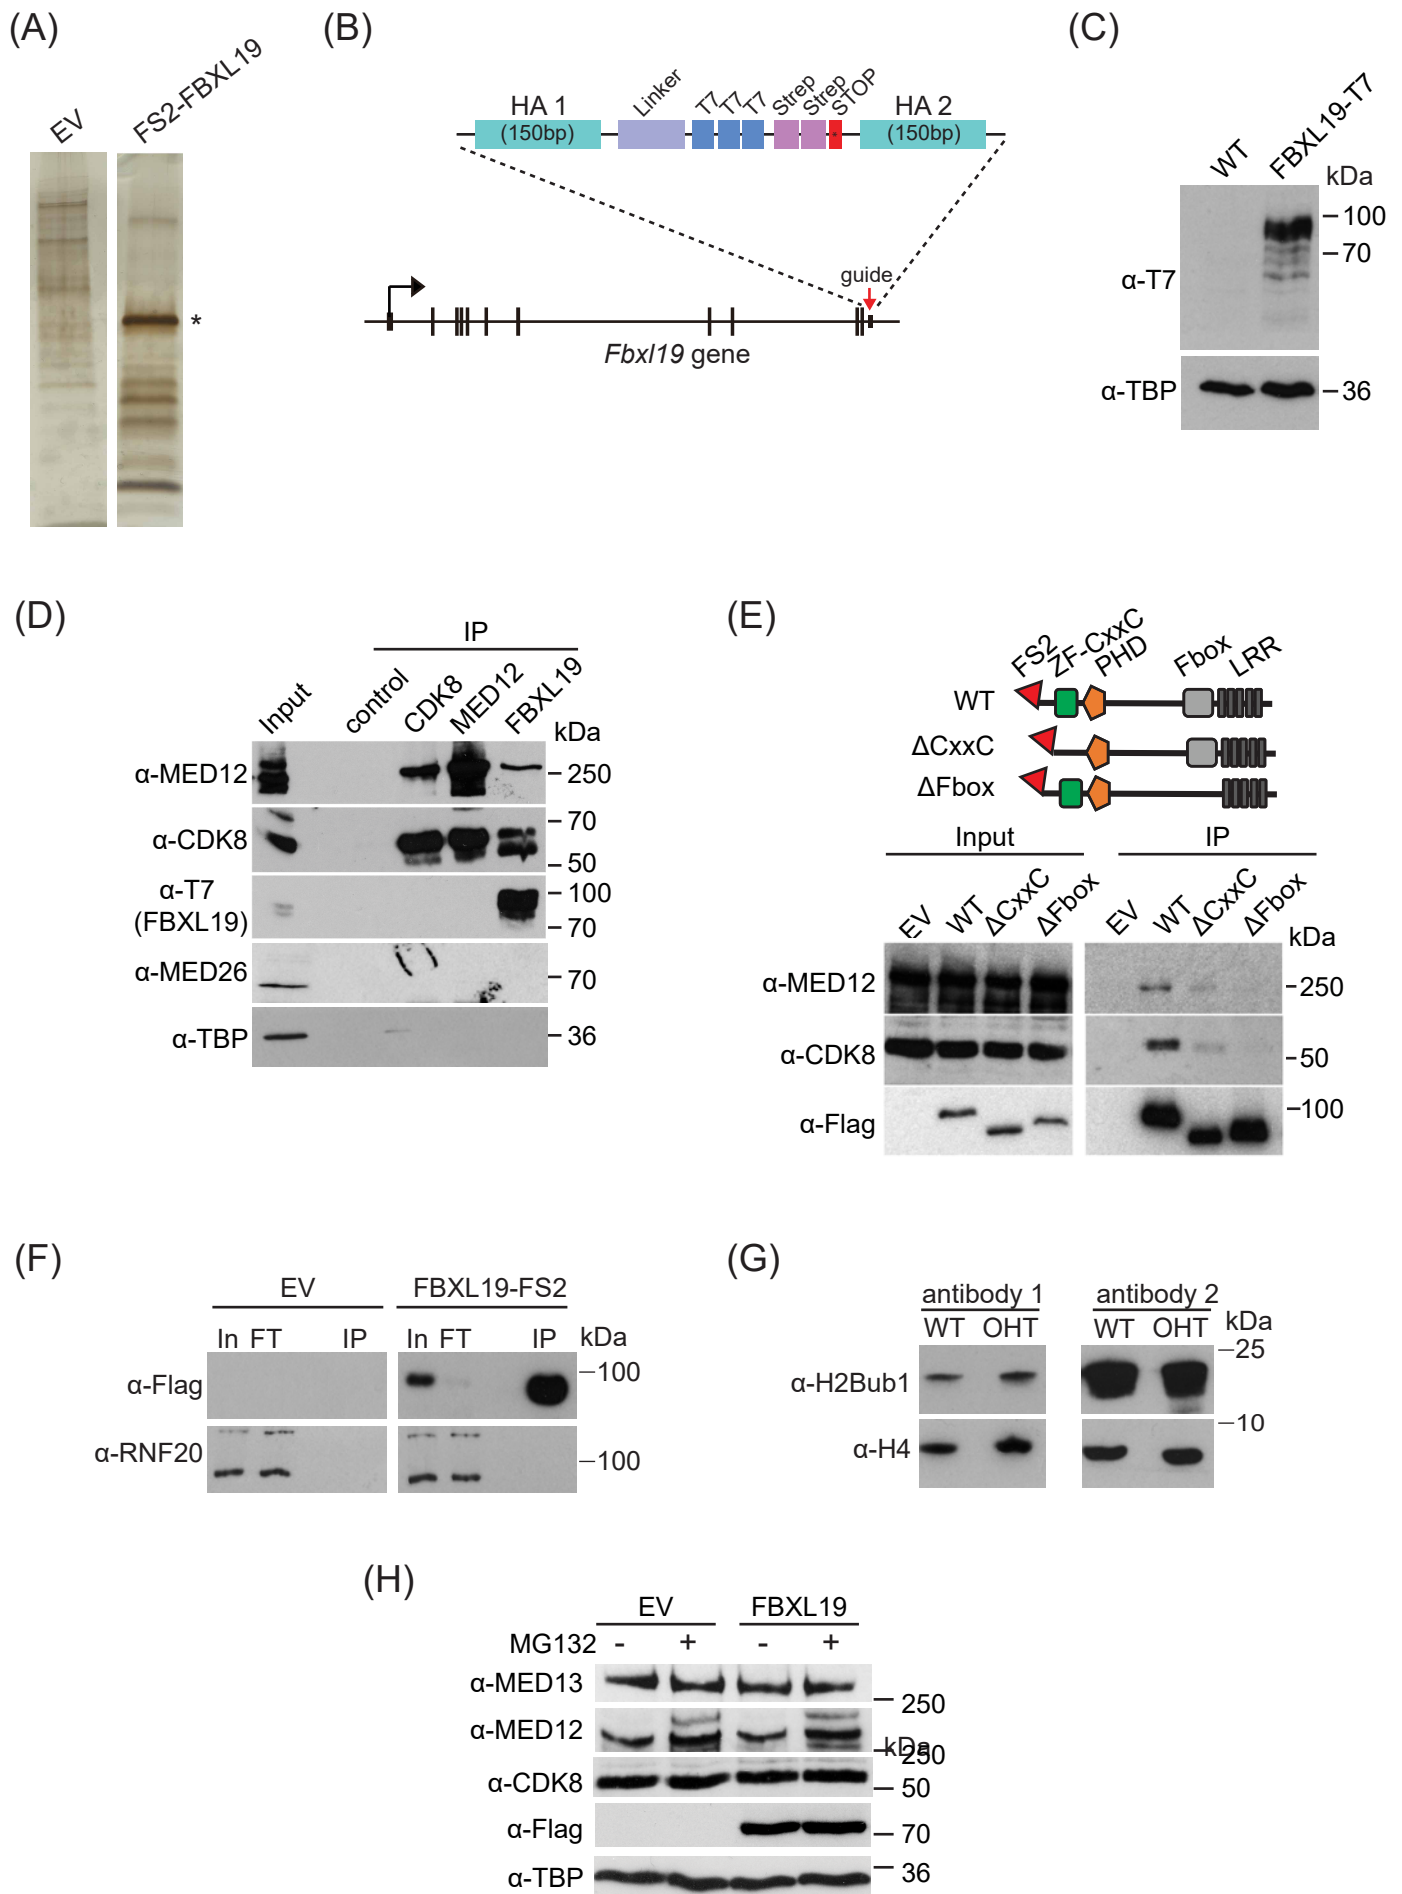

Supplement: supp [file elife-37084-supp-v1.zip › elife_poa_e37084_Figure_2_figure_supplement_1.pdf]

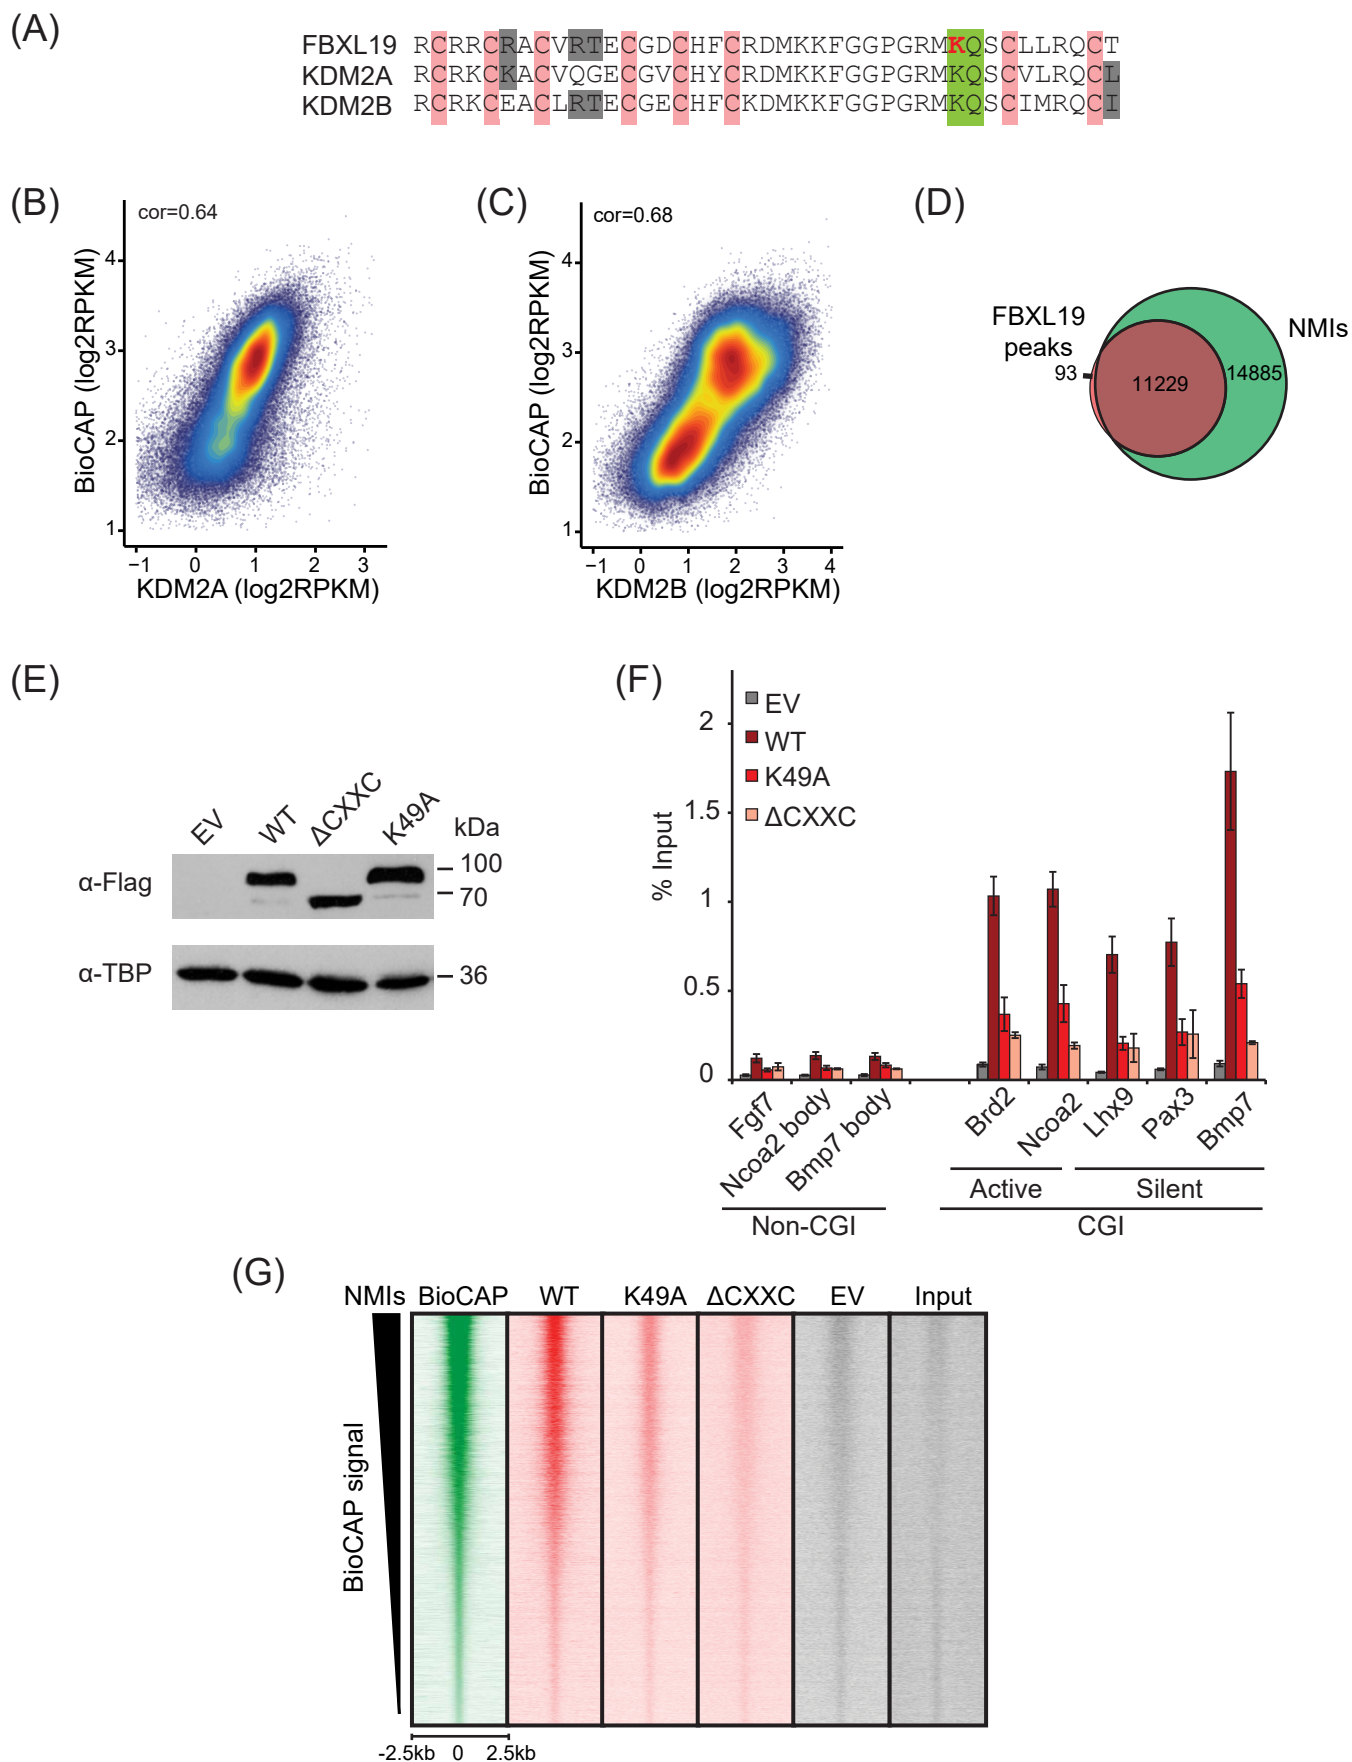

Supplement: supp [file elife-37084-supp-v1.zip › elife_poa_e37084_Figure_1_figure_supplement_1.pdf]

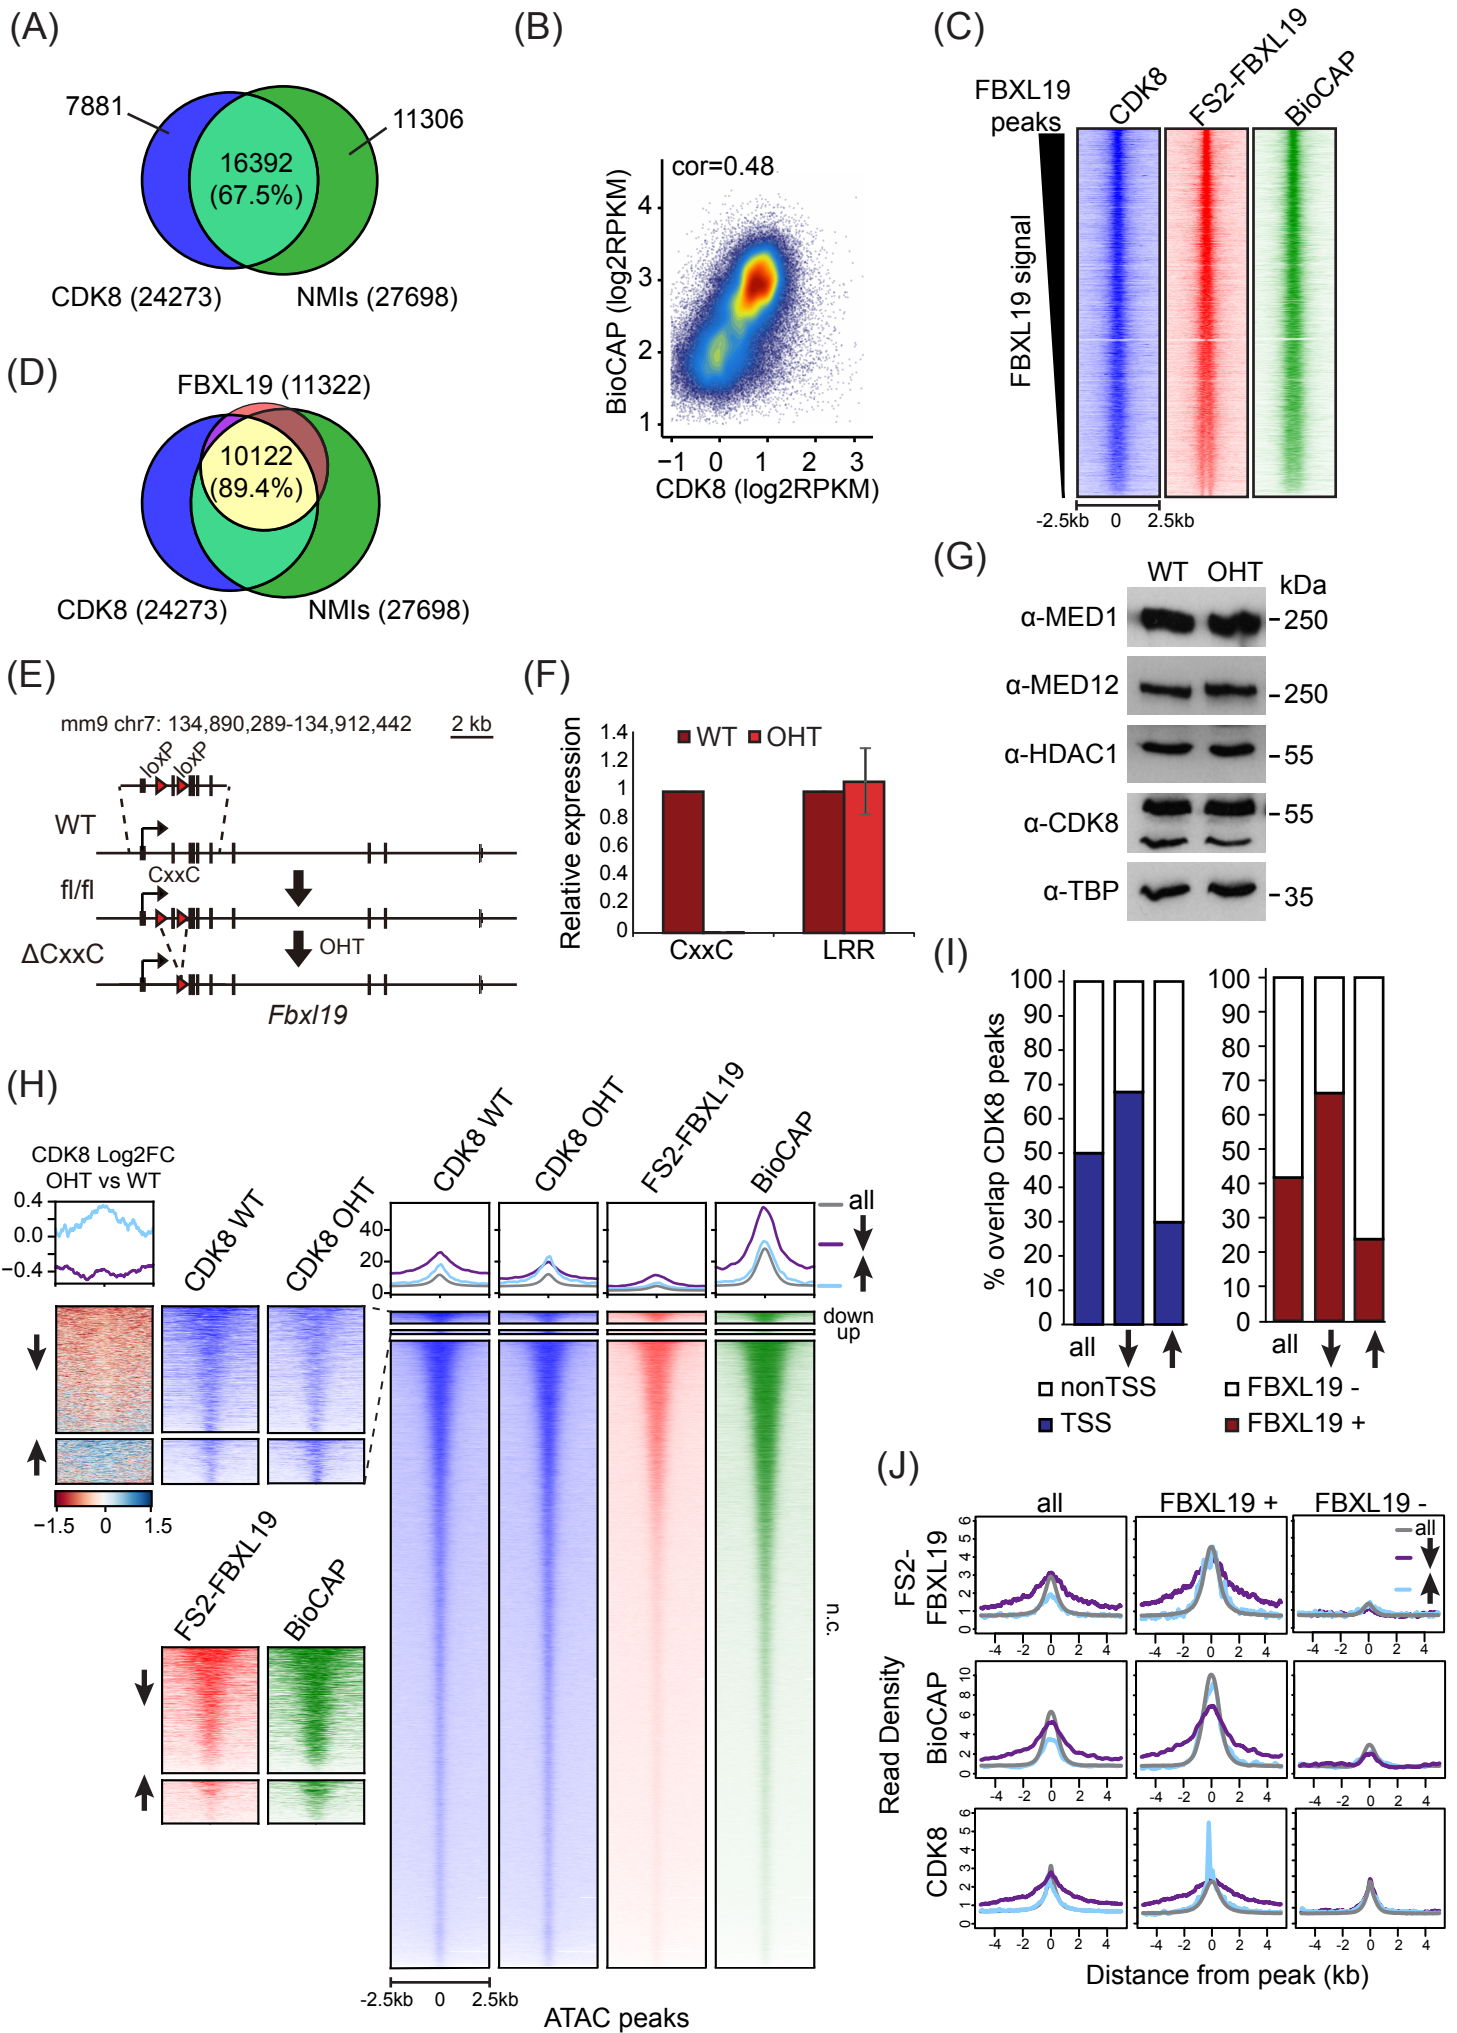

Supplement: supp [file elife-37084-supp-v1.zip › elife_poa_e37084_Figure_4_figure_supplement_1.pdf]

(A)

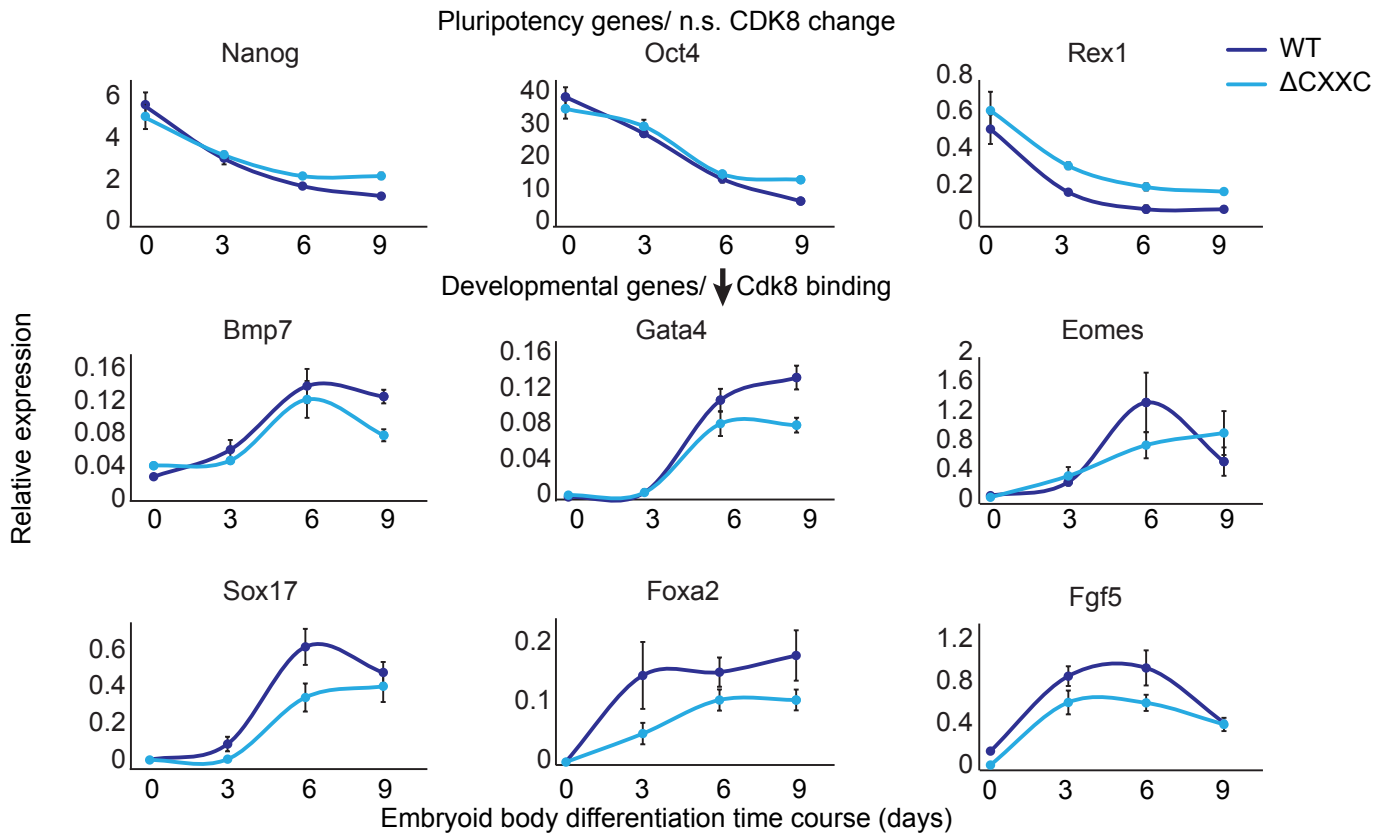

(B)

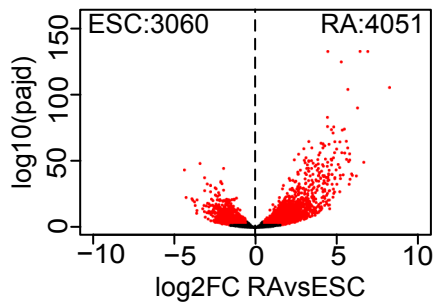

(D)

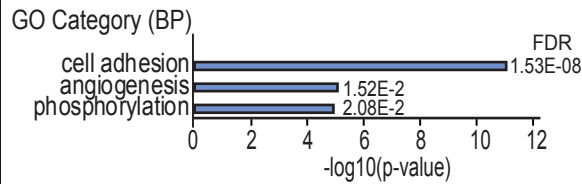

(E)

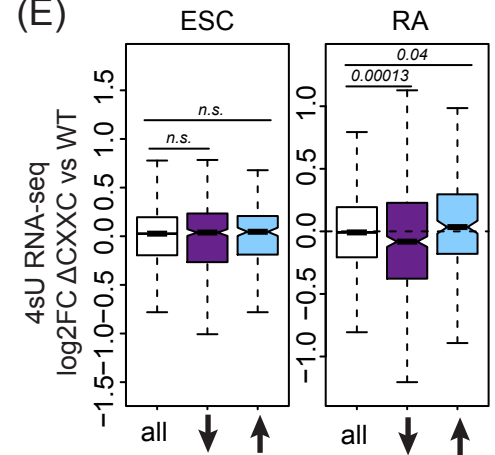

(C)

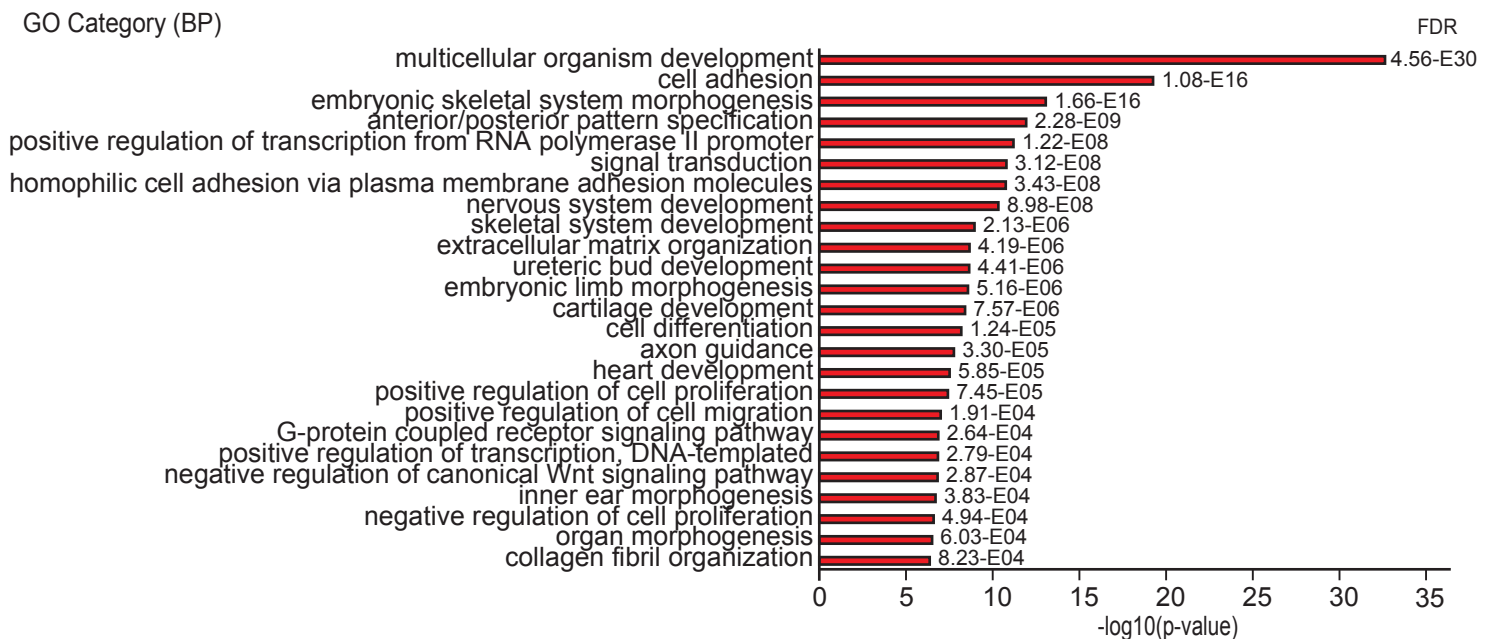

Supplement: supp [file elife-37084-supp-v1.zip › elife_poa_e37084_Figure_6_figure_supplement_1.pdf]

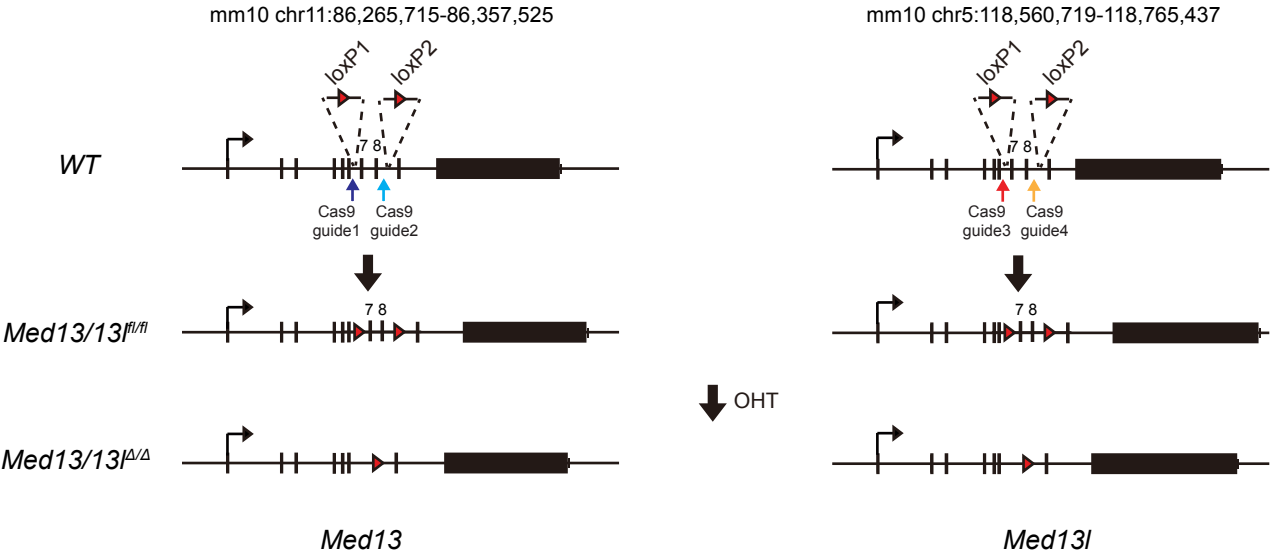

Supplement: supp [file elife-37084-supp-v1.zip › elife_poa_e37084_Figure_7_figure_supplement_1.pdf]

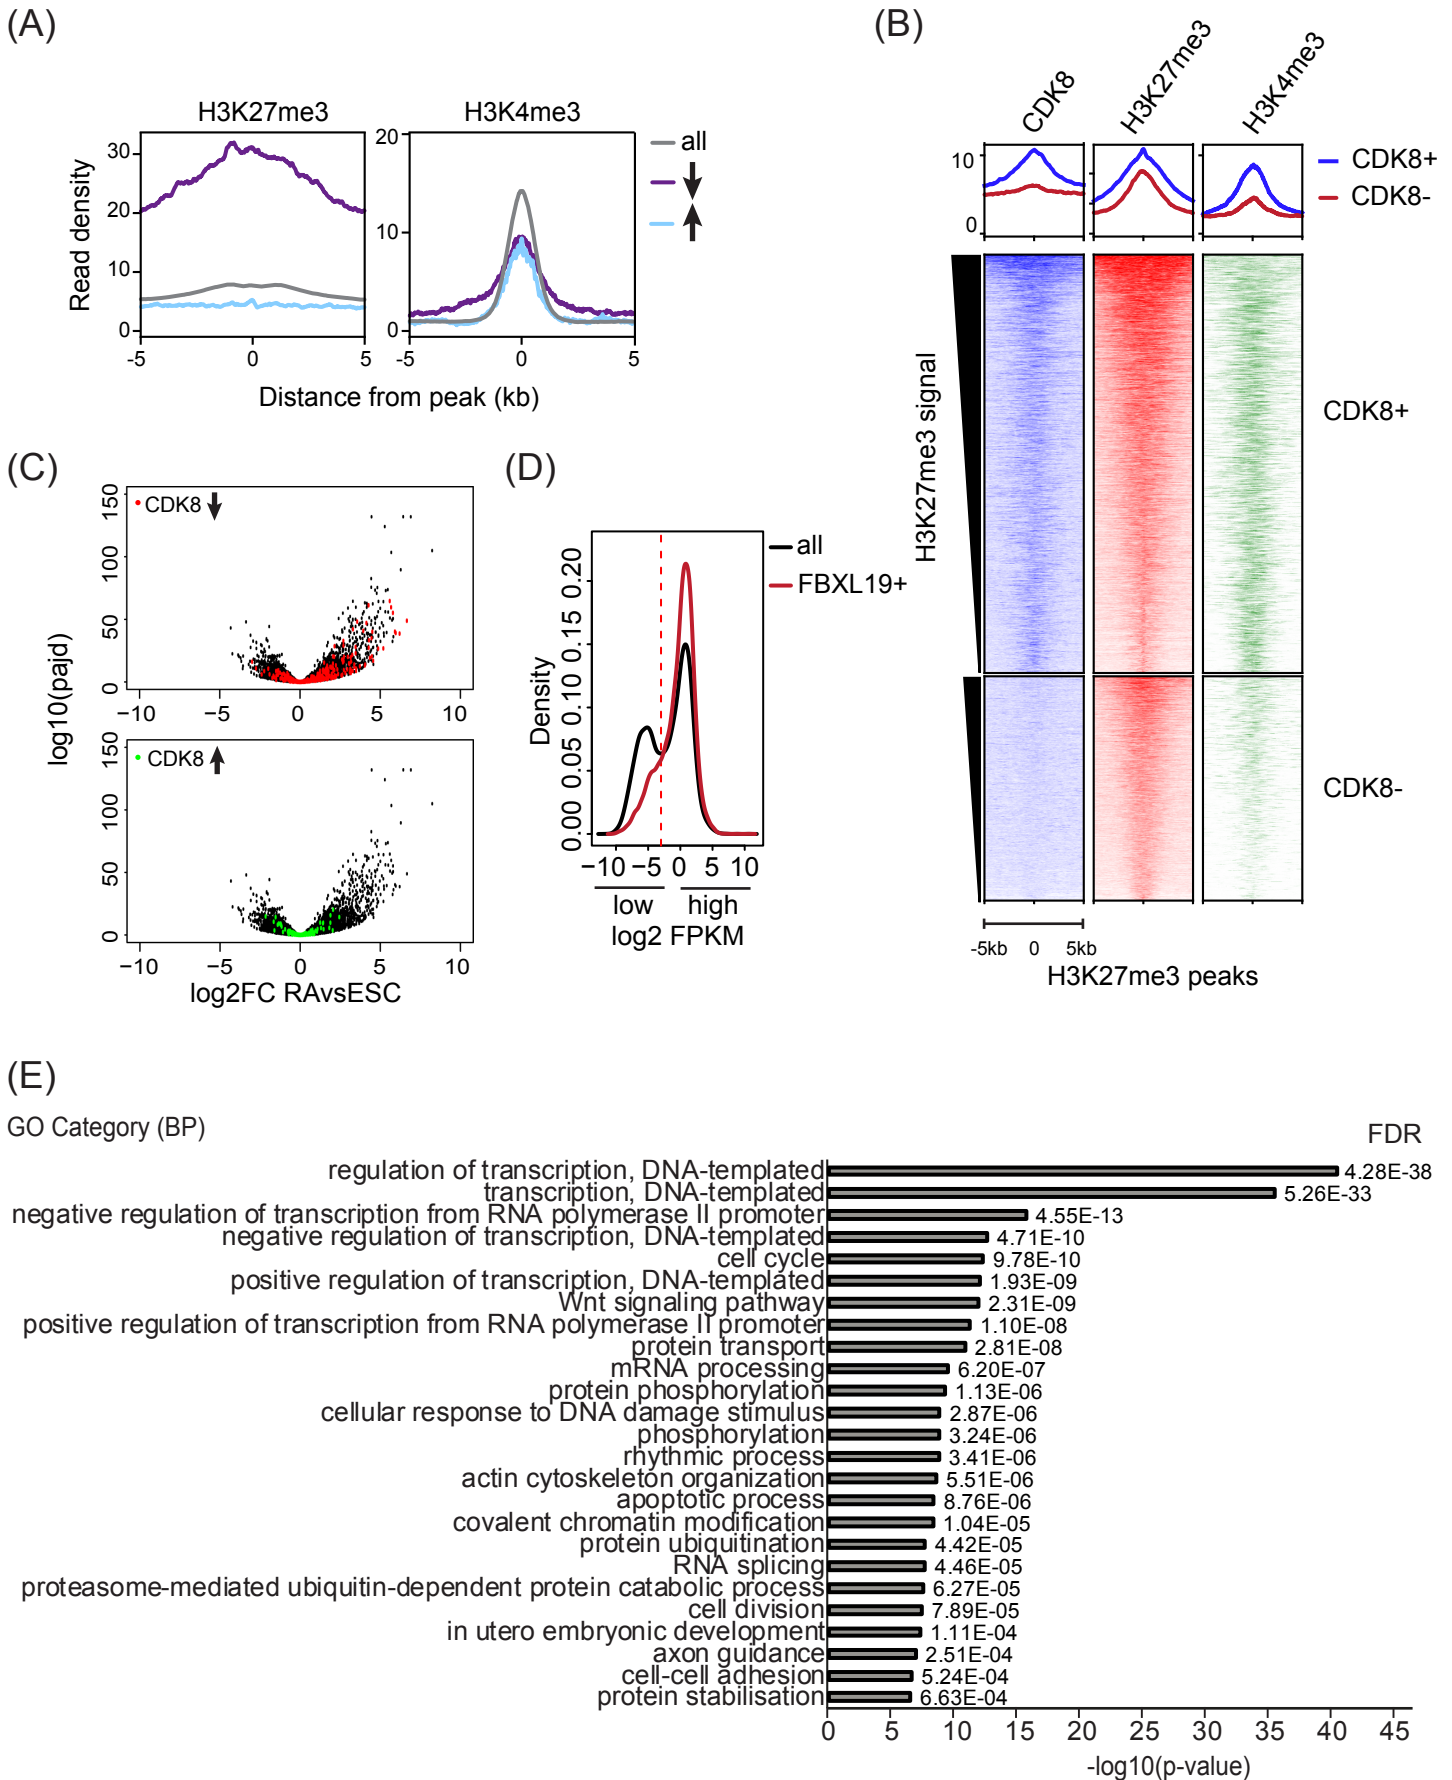

Supplement: supp [file elife-37084-supp-v1.zip › elife_poa_e37084_Figure_5_figure_supplement_1.pdf]

(A)

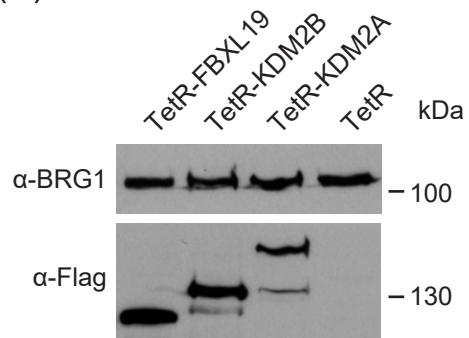

(B)

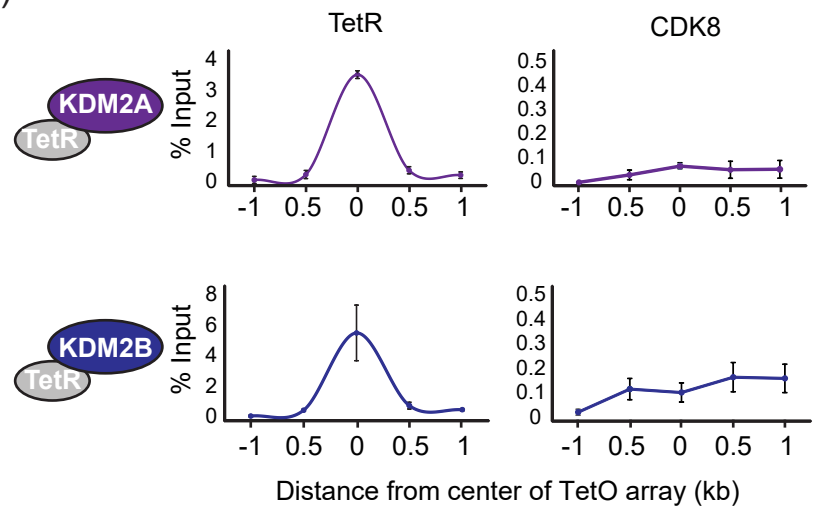

Supplement: supp [file elife-37084-supp-v1.zip › elife_poa_e37084_Figure_3_figure_supplement_1.pdf]
